# Supplementary material for: Autophagy controls the hippocampal postsynaptic organization and affects cognition in a mouse model of Fragile X syndrome
Source: Research Square preprint supplement (doi:10.21203/rs.3.rs-4415392/v1), 2025-08-27
Supplement: Supplementary file 1 [file 0d2ccf3a9c4c43ab4887fec3.xlsx]

## Sheet: Gene_List
Description	access.ID	gene.ID
BDNF/NT-3 growth factors receptor	P15209	Ntrk2
Rap1 GTPase-activating protein 1	A2ALS5	Rap1gap
(E3-independent) E2 ubiquitin-conjugating enzyme UBE2O	Q6ZPJ3	Ube2o
WD40 repeat-containing protein SMU1	Q3UKJ7	Smu1
26S proteasome non-ATPase regulatory subunit 6	Q99JI4	Psmd6
Unconventional myosin-XVIIIa	Q9JMH9	Myo18a
Eukaryotic translation initiation factor 4 gamma 1	Q6NZJ6	Eif4g1
Tudor and KH domain-containing protein	Q80VL1	Tdrkh
Zinc finger Ran-binding domain-containing protein 2	Q9R020	Zranb2
C-Jun-amino-terminal kinase-interacting protein 4	Q58A65	Spag9
ATPase family AAA domain-containing protein 3	Q925I1	Atad3
Succinate dehydrogenase [ubiquinone] flavoprotein subunit, mitochondrial	Q8K2B3	Sdha
Peroxiredoxin-2	Q61171	Prdx2
Cytoplasmic polyadenylation element-binding protein 4	Q7TN98	Cpeb4
Signal recognition particle 54 kDa protein	P14576	Srp54
3-mercaptopyruvate sulfurtransferase	Q99J99	Mpst
Microtubule-associated protein 2	P20357	Map2
Glycine amidinotransferase, mitochondrial	Q9D964	Gatm
Heterogeneous nuclear ribonucleoprotein A0	Q9CX86	Hnrnpa0
Sequestosome-1	Q64337	Sqstm1
RNA-binding protein 10	Q99KG3	Rbm10
Mitochondrial fission factor	Q6PCP5	Mff
Leucine-rich repeat-containing protein 59	Q922Q8	Lrrc59
G protein-regulated inducer of neurite outgrowth 3	Q8BWS5	Gprin3
Disks large homolog 4	Q62108	Dlg4
Tetratricopeptide repeat protein 9A	Q3V038	Ttc9
Ras GTPase-activating protein-binding protein 2	P97379	G3bp2
Cystathionine beta-synthase	Q91WT9	Cbs
Trimeric intracellular cation channel type A	Q3TMP8	Tmem38a
PDZ domain-containing protein GIPC1	Q9Z0G0	Gipc1
Basigin	P18572	Bsg
Serine/threonine-protein phosphatase 6 regulatory subunit 1	Q7TSI3	Ppp6r1
Mitochondrial pyruvate carrier 1	P63030	Mpc1
Growth arrest and DNA damage-inducible proteins-interacting protein 1	Q9CR59	Gadd45gip1
Neuron navigator 1	Q8CH77	Nav1
BRISC and BRCA1-A complex member 2	Q8K3W0	Babam2
Methylmalonic aciduria type A homolog, mitochondrial	Q8C7H1	Mmaa
Mitochondrial inner membrane protein OXA1L	Q8BGA9	Oxa1l
ATP-binding cassette sub-family D member 2	Q61285	Abcd2
IgLON family member 5	Q8HW98	Iglon5
Monocarboxylate transporter 2	O70451	Slc16a7
Neuromodulin	P06837	Gap43

## Sheet: Background
Gene
A2M
A4GALT
AAAS
AACS
AAGAB
AAK1
AAMDC
AAMP
AAR2
AARD
AARS1
AARS2
AARSD1
AASDH
AASDHPPT
AASS
AATF
AATK
ABAT
ABCA1
ABCA2
ABCA3
ABCA4
ABCA5
ABCA6
ABCA7
ABCA8
ABCA9
ABCB1
ABCB10
ABCB4
ABCB6
ABCB7
ABCB8
ABCB9
ABCC1
ABCC10
ABCC12
ABCC3
ABCC4
ABCC5
ABCC8
ABCC9
ABCD1
ABCD2
ABCD3
ABCD4
ABCE1
ABCF1
ABCF2
ABCF3
ABCG1
ABCG4
ABHD1
ABHD10
ABHD11
ABHD12
ABHD12B
ABHD13
ABHD14A
ABHD14B
ABHD15
ABHD16A
ABHD17A
ABHD17B
ABHD17C
ABHD18
ABHD2
ABHD3
ABHD4
ABHD5
ABHD6
ABHD8
ABI1
ABI2
ABI3
ABI3BP
ABITRAM
ABL1
ABL2
ABLIM1
ABLIM2
ABLIM3
ABR
ABRACL
ABRAXAS1
ABRAXAS2
ABT1
ABTB1
ABTB2
ABTB3
ACAA1
ACAA2
ACACA
ACACB
ACAD10
ACAD11
ACAD8
ACAD9
ACADL
ACADM
ACADS
ACADSB
ACADVL
ACAN
ACAP2
ACAP3
ACAT1
ACAT2
ACBD3
ACBD4
ACBD5
ACBD6
ACBD7
ACCS
ACD
ACE
ACE2
ACER2
ACER3
ACHE
ACIN1
ACKR1
ACKR2
ACKR3
ACKR4
ACLY
ACO1
ACO2
ACOT11
ACOT13
ACOT4
ACOT6
ACOT7
ACOT8
ACOT9
ACOX1
ACOX2
ACOX3
ACP1
ACP2
ACP5
ACP6
ACP7
ACR
ACRBP
ACSBG1
ACSF2
ACSF3
ACSL1
ACSL3
ACSL4
ACSL5
ACSL6
ACSM5
ACSS1
ACSS2
ACSS3
ACTA1
ACTA2
ACTB
ACTG1
ACTG2
ACTL6A
ACTL6B
ACTN1
ACTN2
ACTN3
ACTN4
ACTR10
ACTR1A
ACTR1B
ACTR2
ACTR3
ACTR3B
ACTR5
ACTR6
ACTR8
ACTRT3
ACVR1
ACVR1B
ACVR1C
ACVR2A
ACVR2B
ACVRL1
ACY1
ACY3
ACYP2
ADA
ADAL
ADAM10
ADAM11
ADAM12
ADAM15
ADAM17
ADAM18
ADAM22
ADAM23
ADAM33
ADAM9
ADAMTS1
ADAMTS10
ADAMTS15
ADAMTS17
ADAMTS18
ADAMTS19
ADAMTS2
ADAMTS20
ADAMTS3
ADAMTS4
ADAMTS5
ADAMTS8
ADAMTS9
ADAMTSL1
ADAMTSL2
ADAMTSL3
ADAMTSL4
ADAMTSL5
ADAP1
ADAP2
ADAR
ADARB1
ADARB2
ADAT1
ADAT2
ADCK1
ADCK2
ADCK5
ADCY1
ADCY2
ADCY3
ADCY4
ADCY5
ADCY6
ADCY7
ADCY8
ADCY9
ADCYAP1
ADCYAP1R1
ADD1
ADD2
ADD3
ADGRA1
ADGRA2
ADGRA3
ADGRB1
ADGRB2
ADGRB3
ADGRD1
ADGRE1
ADGRE5
ADGRF4
ADGRF5
ADGRG1
ADGRG2
ADGRG6
ADGRL1
ADGRL2
ADGRL3
ADGRL4
ADGRV1
ADH5
ADHFE1
ADI1
ADIPOR1
ADIPOR2
ADK
ADM
ADNP
ADNP2
ADO
ADORA1
ADORA2A
ADORA2B
ADORA3
ADPGK
ADPRH
ADPRHL1
ADPRM
ADPRS
ADRA1A
ADRA1B
ADRA1D
ADRA2A
ADRA2B
ADRA2C
ADRB1
ADRB2
ADRB3
ADRM1
ADSL
ADSS1
ADSS2
AEBP1
AEBP2
AEN
AFAP1
AFAP1L1
AFAP1L2
AFDN
AFF1
AFF2
AFF3
AFF4
AFG1L
AFG3L2
AFMID
AFTPH
AGA
AGAP1
AGAP2
AGAP3
AGBL2
AGBL3
AGBL4
AGBL5
AGER
AGFG1
AGFG2
AGGF1
AGK
AGL
AGMAT
AGMO
AGO1
AGO2
AGO3
AGO4
AGPAT1
AGPAT2
AGPAT3
AGPAT4
AGPAT5
AGPS
AGR3
AGRN
AGRP
AGT
AGTPBP1
AGTR2
AGTRAP
AHCTF1
AHCY
AHCYL1
AHCYL2
AHDC1
AHI1
AHNAK
AHNAK2
AHR
AHSA1
AIDA
AIF1
AIF1L
AIFM1
AIFM2
AIFM3
AIG1
AIM2
AIMP1
AIMP2
AIP
AJAP1
AJM1
AJUBA
AK1
AK2
AK3
AK4
AK5
AK7
AK8
AKAIN1
AKAP1
AKAP10
AKAP11
AKAP12
AKAP13
AKAP14
AKAP5
AKAP6
AKAP7
AKAP8
AKAP8L
AKAP9
AKIP1
AKIRIN1
AKIRIN2
AKNA
AKR1A1
AKR1B1
AKR1B10
AKR1E2
AKR7L
AKT1
AKT1S1
AKT2
AKT3
AKTIP
ALAD
ALAS1
ALAS2
ALCAM
ALDH16A1
ALDH18A1
ALDH1A1
ALDH1A2
ALDH1A3
ALDH1B1
ALDH1L1
ALDH1L2
ALDH2
ALDH3A1
ALDH3A2
ALDH3B1
ALDH3B2
ALDH4A1
ALDH5A1
ALDH6A1
ALDH7A1
ALDOA
ALDOC
ALG1
ALG11
ALG12
ALG13
ALG14
ALG2
ALG3
ALG5
ALG6
ALG8
ALG9
ALK
ALKAL2
ALKBH1
ALKBH2
ALKBH3
ALKBH4
ALKBH5
ALKBH6
ALKBH7
ALKBH8
ALMS1
ALOX12
ALOX12B
ALOX15B
ALOX5
ALOX5AP
ALOXE3
ALPK1
ALPL
ALS2
ALS2CL
ALX3
ALX4
ALYREF
AMACR
AMBRA1
AMD1
AMDHD2
AMER1
AMER2
AMER3
AMFR
AMHR2
AMIGO1
AMIGO2
AMIGO3
AMMECR1
AMMECR1L
AMN
AMN1
AMOT
AMOTL1
AMOTL2
AMPD2
AMPD3
AMPH
AMT
AMZ1
AMZ2
ANAPC1
ANAPC10
ANAPC11
ANAPC13
ANAPC16
ANAPC2
ANAPC4
ANAPC5
ANAPC7
ANG
ANGEL1
ANGEL2
ANGPT1
ANGPT2
ANGPTL1
ANGPTL2
ANGPTL4
ANGPTL6
ANK1
ANK2
ANK3
ANKDD1A
ANKFN1
ANKFY1
ANKH
ANKHD1
ANKIB1
ANKLE2
ANKMY2
ANKRA2
ANKRD10
ANKRD11
ANKRD12
ANKRD13A
ANKRD13B
ANKRD13C
ANKRD13D
ANKRD16
ANKRD17
ANKRD2
ANKRD23
ANKRD24
ANKRD27
ANKRD28
ANKRD29
ANKRD33B
ANKRD34A
ANKRD34B
ANKRD34C
ANKRD35
ANKRD37
ANKRD39
ANKRD40
ANKRD42
ANKRD44
ANKRD45
ANKRD46
ANKRD49
ANKRD50
ANKRD52
ANKRD54
ANKRD55
ANKRD6
ANKRD63
ANKRD66
ANKRD9
ANKS1A
ANKS1B
ANKS3
ANKS6
ANKUB1
ANKZF1
ANLN
ANO1
ANO10
ANO2
ANO3
ANO4
ANO5
ANO6
ANO7
ANO8
ANP32A
ANP32B
ANP32E
ANPEP
ANTKMT
ANTXR1
ANTXR2
ANXA1
ANXA11
ANXA2
ANXA3
ANXA4
ANXA5
ANXA6
ANXA7
ANXA9
AOC2
AOPEP
AOX1
AP1AR
AP1B1
AP1G1
AP1M1
AP1M2
AP1S1
AP1S2
AP1S3
AP2A1
AP2A2
AP2B1
AP2M1
AP2S1
AP3B1
AP3B2
AP3D1
AP3M1
AP3M2
AP3S1
AP3S2
AP4B1
AP4E1
AP4M1
AP4S1
AP5B1
AP5M1
AP5S1
AP5Z1
APAF1
APBA1
APBA2
APBA3
APBB1
APBB1IP
APBB2
APBB3
APC
APC2
APCDD1
APEH
APEX1
APEX2
APH1A
APH1B
API5
APIP
APLF
APLN
APLNR
APLP1
APLP2
APMAP
APOA2
APOBEC1
APOBEC2
APOBEC3H
APOC1
APOC3
APOD
APOE
APOH
APOLD1
APOO
APOOL
APP
APPBP2
APPL1
APPL2
APRT
APTX
AQP1
AQP11
AQP4
AQP6
AQP9
AQR
AR
ARAF
ARAP1
ARAP2
ARAP3
ARC
ARCN1
AREG
AREL1
ARF1
ARF3
ARF4
ARF5
ARF6
ARFGAP1
ARFGAP2
ARFGAP3
ARFGEF1
ARFGEF2
ARFGEF3
ARFIP1
ARFIP2
ARFRP1
ARG1
ARG2
ARGLU1
ARHGAP1
ARHGAP10
ARHGAP11A
ARHGAP12
ARHGAP15
ARHGAP17
ARHGAP18
ARHGAP19
ARHGAP20
ARHGAP21
ARHGAP22
ARHGAP23
ARHGAP24
ARHGAP25
ARHGAP26
ARHGAP27
ARHGAP29
ARHGAP30
ARHGAP31
ARHGAP32
ARHGAP33
ARHGAP35
ARHGAP36
ARHGAP39
ARHGAP4
ARHGAP42
ARHGAP44
ARHGAP45
ARHGAP5
ARHGAP9
ARHGDIA
ARHGDIB
ARHGDIG
ARHGEF1
ARHGEF10
ARHGEF10L
ARHGEF11
ARHGEF12
ARHGEF15
ARHGEF16
ARHGEF17
ARHGEF18
ARHGEF19
ARHGEF2
ARHGEF25
ARHGEF26
ARHGEF28
ARHGEF3
ARHGEF33
ARHGEF37
ARHGEF39
ARHGEF40
ARHGEF5
ARHGEF6
ARHGEF7
ARHGEF9
ARID1A
ARID1B
ARID2
ARID3A
ARID3B
ARID4A
ARID4B
ARID5A
ARID5B
ARIH1
ARIH2
ARL1
ARL10
ARL11
ARL13B
ARL14EP
ARL15
ARL16
ARL2
ARL2BP
ARL3
ARL4A
ARL4C
ARL4D
ARL5A
ARL5B
ARL5C
ARL6
ARL6IP1
ARL6IP4
ARL6IP5
ARL6IP6
ARL8A
ARL8B
ARL9
ARMC1
ARMC10
ARMC2
ARMC3
ARMC5
ARMC6
ARMC7
ARMC8
ARMC9
ARMCX1
ARMCX2
ARMCX3
ARMCX4
ARMCX5
ARMCX6
ARMH1
ARMH3
ARMH4
ARMT1
ARNT
ARNT2
ARPC1A
ARPC1B
ARPC2
ARPC3
ARPC4
ARPC5
ARPC5L
ARPIN
ARPP19
ARPP21
ARR3
ARRB1
ARRB2
ARRDC1
ARRDC2
ARRDC3
ARRDC4
ARSA
ARSB
ARSG
ARSI
ARSJ
ARSK
ART3
ART4
ARTN
ARV1
ARVCF
ARX
AS3MT
ASAH1
ASAH2
ASAP1
ASAP2
ASAP3
ASB1
ASB11
ASB13
ASB16
ASB18
ASB2
ASB3
ASB4
ASB5
ASB6
ASB7
ASB8
ASCC1
ASCC2
ASCC3
ASCL1
ASCL5
ASF1A
ASF1B
ASGR1
ASH1L
ASH2L
ASIC1
ASIC2
ASIC4
ASL
ASNS
ASNSD1
ASPA
ASPDH
ASPG
ASPH
ASPHD1
ASPHD2
ASPN
ASPRV1
ASPSCR1
ASRGL1
ASS1
ASTE1
ASTN1
ASTN2
ASXL1
ASXL2
ASXL3
ATAD1
ATAD2B
ATAD3A
ATAD5
ATAT1
ATCAY
ATE1
ATF1
ATF2
ATF3
ATF4
ATF5
ATF6
ATF6B
ATF7
ATF7IP
ATG10
ATG101
ATG12
ATG13
ATG14
ATG16L1
ATG16L2
ATG2A
ATG2B
ATG3
ATG4A
ATG4B
ATG4C
ATG4D
ATG5
ATG7
ATG9A
ATG9B
ATIC
ATL1
ATL2
ATL3
ATM
ATMIN
ATN1
ATOH7
ATOSA
ATOSB
ATOX1
ATP10A
ATP10B
ATP11A
ATP11B
ATP11C
ATP13A1
ATP13A2
ATP13A3
ATP13A4
ATP13A5
ATP1A1
ATP1A2
ATP1A3
ATP1B1
ATP1B2
ATP1B3
ATP23
ATP2A1
ATP2A2
ATP2A3
ATP2B1
ATP2B2
ATP2B3
ATP2B4
ATP2C1
ATP2C2
ATP5F1A
ATP5F1B
ATP5F1C
ATP5F1D
ATP5F1E
ATP5IF1
ATP5MC2
ATP5MC3
ATP5ME
ATP5MF
ATP5MJ
ATP5MK
ATP5PB
ATP5PD
ATP5PF
ATP5PO
ATP6AP1
ATP6AP2
ATP6V0A1
ATP6V0A2
ATP6V0B
ATP6V0C
ATP6V0D1
ATP6V0E1
ATP6V0E2
ATP6V1A
ATP6V1B2
ATP6V1C1
ATP6V1C2
ATP6V1D
ATP6V1E1
ATP6V1F
ATP6V1G1
ATP6V1G2
ATP6V1H
ATP7A
ATP7B
ATP8A1
ATP8A2
ATP8B1
ATP8B2
ATP8B3
ATP9A
ATP9B
ATPAF1
ATPAF2
ATPSCKMT
ATR
ATRAID
ATRIP
ATRN
ATRNL1
ATRX
ATXN1
ATXN10
ATXN1L
ATXN2
ATXN2L
ATXN3
ATXN7
ATXN7L1
ATXN7L2
ATXN7L3
ATXN7L3B
AUH
AUP1
AURKA
AURKAIP1
AURKB
AUTS2
AVEN
AVIL
AVL9
AVP
AVPI1
AVPR1A
AXIN1
AXIN2
AXL
AZI2
AZIN1
AZIN2
B2M
B3GALNT1
B3GALNT2
B3GALT1
B3GALT2
B3GALT4
B3GALT5
B3GALT6
B3GAT1
B3GAT2
B3GAT3
B3GLCT
B3GNT2
B3GNT4
B3GNT5
B3GNT7
B3GNT9
B3GNTL1
B4GALNT1
B4GALNT4
B4GALT1
B4GALT2
B4GALT3
B4GALT4
B4GALT5
B4GALT6
B4GALT7
B4GAT1
B9D1
B9D2
BAALC
BABAM1
BABAM2
BACE1
BACE2
BACH1
BACH2
BAD
BAG1
BAG2
BAG3
BAG4
BAG5
BAG6
BAHCC1
BAHD1
BAIAP2
BAIAP2L1
BAIAP2L2
BAIAP3
BAK1
BAMBI
BANF1
BANK1
BANP
BAP1
BARHL1
BARHL2
BARX2
BASP1
BATF3
BAX
BAZ1A
BAZ1B
BAZ2A
BAZ2B
BBC3
BBIP1
BBLN
BBOF1
BBOX1
BBS1
BBS10
BBS12
BBS2
BBS4
BBS5
BBS7
BBS9
BBX
BCAM
BCAN
BCAP29
BCAP31
BCAR1
BCAR3
BCAS1
BCAS2
BCAS3
BCAT1
BCAT2
BCCIP
BCDIN3D
BCHE
BCKDHA
BCKDHB
BCKDK
BCL10
BCL11A
BCL11B
BCL2
BCL2A1
BCL2L1
BCL2L11
BCL2L12
BCL2L13
BCL2L15
BCL2L2
BCL6
BCL6B
BCL7A
BCL7B
BCL7C
BCL9
BCL9L
BCLAF1
BCLAF3
BCO2
BCOR
BCORL1
BCR
BCS1L
BDH1
BDH2
BDKRB1
BDNF
BDP1
BEAN1
BECN1
BEGAIN
BEND3
BEND5
BEND6
BEND7
BEST1
BEX3
BEX4
BFAR
BFSP1
BFSP2
BGLAP
BGN
BHLHA9
BHLHE22
BHLHE40
BHLHE41
BHMT
BICC1
BICD1
BICD2
BICDL1
BICRA
BICRAL
BID
BIN1
BIN2
BIN3
BIRC2
BIRC3
BIRC5
BIRC6
BIRC7
BIVM
BLCAP
BLM
BLMH
BLNK
BLOC1S1
BLOC1S2
BLOC1S3
BLOC1S4
BLOC1S5
BLOC1S6
BLTP1
BLTP2
BLTP3A
BLTP3B
BLVRA
BLVRB
BLZF1
BMAL1
BMAL2
BMERB1
BMF
BMI1
BMP1
BMP2
BMP2K
BMP3
BMP4
BMP5
BMP6
BMP7
BMPER
BMPR1A
BMPR1B
BMPR2
BMS1
BMT2
BMX
BNC2
BNIP1
BNIP2
BNIP3
BNIP3L
BNIP5
BNIPL
BOC
BOD1L1
BOK
BOLA1
BOLA3
BOP1
BORA
BORCS5
BORCS6
BORCS7
BORCS8
BPGM
BPHL
BPIFA1
BPIFB1
BPNT1
BPNT2
BPTF
BRAF
BRAP
BRAT1
BRCA1
BRCC3
BRD1
BRD2
BRD3
BRD4
BRD8
BRD9
BRDT
BRF1
BRF2
BRI3
BRI3BP
BRICD5
BRINP1
BRINP2
BRINP3
BRIP1
BRIX1
BRK1
BRME1
BRMS1
BRMS1L
BROX
BRPF1
BRPF3
BRS3
BRSK1
BRSK2
BRWD1
BRWD3
BSCL2
BSDC1
BSG
BSN
BST2
BSX
BTAF1
BTBD1
BTBD10
BTBD16
BTBD17
BTBD2
BTBD3
BTBD6
BTBD7
BTBD8
BTBD9
BTD
BTF3
BTF3L4
BTG1
BTG2
BTG3
BTK
BTN2A2
BTRC
BUB1
BUB1B
BUB3
BUD13
BUD23
BUD31
BVES
BYSL
BZW1
BZW2
C10orf105
C10orf143
C10orf53
C10orf88
C10orf90
C10orf95
C11orf1
C11orf16
C11orf24
C11orf52
C11orf54
C11orf58
C11orf65
C11orf68
C11orf71
C11orf87
C11orf96
C11orf97
C11orf98
C12orf29
C12orf4
C12orf43
C12orf57
C12orf60
C12orf75
C14orf119
C14orf132
C14orf28
C14orf39
C14orf93
C15orf39
C15orf40
C15orf48
C15orf61
C15orf62
C16orf46
C16orf54
C16orf74
C16orf87
C16orf89
C16orf90
C16orf91
C17orf100
C17orf114
C17orf49
C17orf58
C17orf67
C17orf75
C17orf80
C17orf97
C17orf98
C18orf21
C18orf25
C18orf32
C18orf54
C19orf12
C19orf25
C19orf38
C19orf44
C19orf47
C19orf53
C19orf54
C1D
C1GALT1
C1GALT1C1
C1orf109
C1orf112
C1orf115
C1orf116
C1orf122
C1orf131
C1orf159
C1orf162
C1orf174
C1orf198
C1orf21
C1orf216
C1orf232
C1orf35
C1orf43
C1orf50
C1orf52
C1orf53
C1orf54
C1orf74
C1orf94
C1QA
C1QB
C1QBP
C1QC
C1QL1
C1QL2
C1QL3
C1QL4
C1QTNF1
C1QTNF12
C1QTNF2
C1QTNF3
C1QTNF4
C1QTNF5
C1QTNF6
C1QTNF7
C1R
C1S
C2
C20orf202
C20orf204
C20orf27
C20orf85
C20orf96
C21orf62
C21orf91
C22orf15
C22orf23
C22orf39
C2CD2
C2CD2L
C2CD3
C2CD4C
C2CD5
C2orf42
C2orf49
C2orf68
C2orf69
C2orf72
C2orf80
C2orf81
C2orf88
C3
C3AR1
C3orf14
C3orf18
C3orf33
C3orf38
C3orf62
C3orf70
C3orf80
C4orf19
C4orf3
C4orf33
C4orf46
C4orf47
C4orf48
C4orf50
C4orf54
C5
C5AR1
C5orf15
C5orf22
C5orf24
C5orf34
C5orf49
C5orf52
C5orf63
C6orf118
C6orf120
C6orf136
C6orf163
C6orf226
C6orf47
C6orf62
C6orf89
C7orf25
C7orf31
C7orf50
C7orf57
C8G
C8orf33
C8orf34
C8orf48
C8orf58
C8orf76
C8orf82
C8orf88
C9orf40
C9orf50
C9orf64
C9orf72
C9orf78
C9orf85
CA10
CA11
CA12
CA13
CA14
CA2
CA3
CA4
CA5B
CA7
CA8
CA9
CAAP1
CAB39
CAB39L
CABCOCO1
CABIN1
CABLES1
CABLES2
CABP1
CABP2
CABP7
CABYR
CACFD1
CACHD1
CACNA1A
CACNA1B
CACNA1C
CACNA1D
CACNA1E
CACNA1G
CACNA1H
CACNA1I
CACNA1S
CACNA2D1
CACNA2D2
CACNA2D3
CACNA2D4
CACNB1
CACNB2
CACNB3
CACNB4
CACNG1
CACNG2
CACNG3
CACNG4
CACNG5
CACNG6
CACNG7
CACNG8
CACTIN
CACUL1
CACYBP
CAD
CADM1
CADM2
CADM3
CADM4
CADPS2
CAGE1
CALB1
CALB2
CALCA
CALCB
CALCOCO1
CALCR
CALCRL
CALD1
CALHM2
CALHM5
CALM1
CALM2
CALM3
CALML4
CALN1
CALR
CALR3
CALU
CALY
CAMK1
CAMK1D
CAMK1G
CAMK2A
CAMK2B
CAMK2G
CAMK2N1
CAMK2N2
CAMK4
CAMKK1
CAMKK2
CAMKMT
CAMKV
CAMLG
CAMSAP1
CAMSAP2
CAMSAP3
CAMTA1
CAMTA2
CAND1
CAND2
CANT1
CANX
CAP1
CAP2
CAPG
CAPN1
CAPN10
CAPN15
CAPN2
CAPN3
CAPN5
CAPN6
CAPN7
CAPNS1
CAPRIN1
CAPRIN2
CAPSL
CAPZA1
CAPZA2
CAPZB
CARD10
CARD19
CARD6
CARD9
CARF
CARHSP1
CARM1
CARMIL1
CARMIL3
CARNMT1
CARNS1
CARS1
CARS2
CARTPT
CASC3
CASD1
CASK
CASKIN1
CASKIN2
CASP1
CASP12
CASP2
CASP3
CASP6
CASP7
CASP8
CASP8AP2
CASP9
CASQ2
CASR
CAST
CASTOR1
CASTOR2
CAT
CATIP
CATSPER2
CATSPERD
CATSPERZ
CAV1
CAV2
CAVIN1
CAVIN2
CAVIN3
CBARP
CBFA2T2
CBFA2T3
CBFB
CBL
CBLB
CBLL1
CBLN1
CBLN2
CBLN3
CBLN4
CBR1
CBR3
CBR4
CBS
CBX1
CBX2
CBX3
CBX4
CBX5
CBX6
CBX7
CBX8
CBY1
CC2D1A
CC2D1B
CC2D2A
CCAR1
CCAR2
CCBE1
CCDC102A
CCDC103
CCDC106
CCDC107
CCDC112
CCDC113
CCDC115
CCDC116
CCDC117
CCDC12
CCDC120
CCDC122
CCDC124
CCDC126
CCDC127
CCDC13
CCDC134
CCDC136
CCDC137
CCDC138
CCDC14
CCDC141
CCDC146
CCDC148
CCDC149
CCDC15
CCDC153
CCDC157
CCDC159
CCDC160
CCDC167
CCDC170
CCDC174
CCDC177
CCDC180
CCDC181
CCDC184
CCDC186
CCDC187
CCDC190
CCDC191
CCDC192
CCDC22
CCDC24
CCDC25
CCDC28A
CCDC28B
CCDC3
CCDC30
CCDC32
CCDC33
CCDC34
CCDC39
CCDC40
CCDC42
CCDC43
CCDC47
CCDC50
CCDC51
CCDC57
CCDC59
CCDC6
CCDC60
CCDC61
CCDC65
CCDC66
CCDC69
CCDC71
CCDC71L
CCDC77
CCDC78
CCDC8
CCDC80
CCDC81
CCDC82
CCDC85A
CCDC85B
CCDC85C
CCDC86
CCDC87
CCDC88A
CCDC88B
CCDC88C
CCDC89
CCDC9
CCDC90B
CCDC91
CCDC92
CCDC92B
CCDC93
CCDC97
CCDC9B
CCER2
CCHCR1
CCK
CCKAR
CCKBR
CCL17
CCL19
CCL2
CCL24
CCL28
CCL4
CCM2
CCM2L
CCN1
CCN2
CCN3
CCN4
CCN5
CCNA1
CCNA2
CCNB1
CCNB1IP1
CCNB2
CCNC
CCND1
CCND2
CCND3
CCNDBP1
CCNE1
CCNE2
CCNF
CCNG1
CCNG2
CCNH
CCNI
CCNJ
CCNJL
CCNK
CCNL1
CCNL2
CCNO
CCNQ
CCNT1
CCNT2
CCNY
CCNYL1
CCP110
CCPG1
CCR6
CCRL2
CCS
CCSAP
CCSER1
CCSER2
CCT2
CCT3
CCT4
CCT5
CCT6A
CCT7
CCT8
CD109
CD14
CD151
CD163
CD164
CD164L2
CD180
CD1D
CD200
CD24
CD248
CD274
CD276
CD28
CD2AP
CD2BP2
CD302
CD320
CD34
CD36
CD37
CD38
CD4
CD40
CD44
CD46
CD47
CD48
CD52
CD53
CD63
CD7
CD70
CD72
CD74
CD80
CD81
CD82
CD83
CD84
CD86
CD9
CD93
CD99L2
CDA
CDADC1
CDAN1
CDC123
CDC14A
CDC16
CDC20
CDC23
CDC25A
CDC25B
CDC25C
CDC26
CDC27
CDC34
CDC37
CDC37L1
CDC40
CDC42
CDC42BPA
CDC42BPB
CDC42BPG
CDC42EP1
CDC42EP2
CDC42EP3
CDC42EP4
CDC42EP5
CDC42SE1
CDC42SE2
CDC45
CDC5L
CDC6
CDC7
CDC73
CDCA2
CDCA3
CDCA4
CDCA5
CDCA7
CDCA7L
CDCA8
CDH1
CDH10
CDH11
CDH12
CDH13
CDH15
CDH16
CDH18
CDH19
CDH2
CDH20
CDH22
CDH24
CDH26
CDH3
CDH4
CDH5
CDH6
CDH7
CDH8
CDH9
CDHR1
CDHR2
CDHR3
CDHR4
CDIN1
CDIP1
CDIPT
CDK1
CDK10
CDK12
CDK13
CDK14
CDK15
CDK16
CDK17
CDK18
CDK19
CDK2
CDK20
CDK2AP1
CDK2AP2
CDK4
CDK5
CDK5R1
CDK5R2
CDK5RAP1
CDK5RAP2
CDK5RAP3
CDK7
CDK8
CDK9
CDKAL1
CDKL1
CDKL2
CDKL3
CDKL4
CDKL5
CDKN1A
CDKN1B
CDKN1C
CDKN2AIP
CDKN2AIPNL
CDKN2B
[truncated: 11,732 more rows]

## Sheet: GO_BO
Category	Term	Count	%	PValue	Genes	List Total	Pop Hits	Pop Total	Fold Enrichment	Bonferroni	Benjamini	FDR
GOTERM_BP_5	GO:0046942~carboxylic acid transport	5	12.5	0.00462966	NTRK2, ABCD2, MPC1, GIPC1, SLC16A7	38	220	11918	7.12799	0.911282	1	1
GOTERM_BP_5	GO:0070814~hydrogen sulfide biosynthetic process	2	5	0.00928554	MPST, CBS	38	3	11918	209.088	0.992324	1	1
GOTERM_BP_5	GO:0008038~neuron recognition	3	7.5	0.012126	NTRK2, GAP43, BSG	38	54	11918	17.424	0.998285	1	1
GOTERM_BP_5	GO:1903829~positive regulation of protein localization	6	15	0.0160029	DLG4, BSG, MYO18A, MFF, SQSTM1, EIF4G1	38	483	11918	3.89604	0.99978	1	1
GOTERM_BP_5	GO:1901475~pyruvate transmembrane transport	2	5	0.0184872	MPC1, SLC16A7	38	6	11918	104.544	0.999941	1	1
GOTERM_BP_5	GO:0006534~cysteine metabolic process	2	5	0.0276056	MPST, CBS	38	9	11918	69.6959	1	1	1
GOTERM_BP_5	GO:0050667~homocysteine metabolic process	2	5	0.0276056	MPST, CBS	38	9	11918	69.6959	1	1	1
GOTERM_BP_5	GO:0007399~nervous system development	12	30	0.0358397	GPRIN3, MPST, NTRK2, GAP43, ABCD2, DLG4, CBS, MAP2, BSG, NAV1, SDHA, EIF4G1	38	1999	11918	1.88273	1	1	1
GOTERM_BP_5	GO:0043436~oxoacid metabolic process	6	15	0.036822	MPST, GATM, ABCD2, CBS, MPC1, SDHA	38	601	11918	3.1311	1	1	1
GOTERM_BP_5	GO:0048640~negative regulation of developmental growth	3	7.5	0.0369922	SPAG9, MAP2, RBM10	38	98	11918	9.60097	1	1	1
GOTERM_BP_5	GO:0043069~negative regulation of programmed cell death	7	17.5	0.0376756	NTRK2, PRDX2, BABAM2, CBS, MYO18A, SQSTM1, CPEB4	38	814	11918	2.69708	1	1	1
GOTERM_BP_5	GO:0014047~glutamate secretion	2	5	0.0455959	NTRK2, GIPC1	38	15	11918	41.8175	1	1	1
GOTERM_BP_5	GO:1903825~organic acid transmembrane transport	3	7.5	0.0486121	ABCD2, MPC1, SLC16A7	38	114	11918	8.25346	1	1	1
GOTERM_BP_5	GO:0048667~cell morphogenesis involved in neuron differentiation	5	12.5	0.0530455	NTRK2, GAP43, DLG4, MAP2, BSG	38	460	11918	3.40904	1	1	1
GOTERM_BP_5	GO:0032880~regulation of protein localization	7	17.5	0.053822	DLG4, MAP2, BSG, MYO18A, MFF, SQSTM1, EIF4G1	38	888	11918	2.47232	1	1	1
GOTERM_BP_5	GO:0030100~regulation of endocytosis	4	10	0.0639311	DLG4, MYO18A, MFF, RAP1GAP	38	297	11918	4.22399	1	1	1
GOTERM_BP_5	GO:0048699~generation of neurons	8	20	0.0682955	GPRIN3, NTRK2, GAP43, DLG4, MAP2, BSG, NAV1, EIF4G1	38	1182	11918	2.12272	1	1	1
GOTERM_BP_5	GO:0048812~neuron projection morphogenesis	5	12.5	0.0723932	NTRK2, GAP43, DLG4, MAP2, BSG	38	511	11918	3.0688	1	1	1
GOTERM_BP_5	GO:0120039~plasma membrane bounded cell projection morphogenesis	5	12.5	0.0748823	NTRK2, GAP43, DLG4, MAP2, BSG	38	517	11918	3.03319	1	1	1
GOTERM_BP_5	GO:0031175~neuron projection development	6	15	0.078814	GPRIN3, NTRK2, GAP43, DLG4, MAP2, BSG	38	746	11918	2.52251	1	1	1
GOTERM_BP_5	GO:0048858~cell projection morphogenesis	5	12.5	0.0795596	NTRK2, GAP43, DLG4, MAP2, BSG	38	528	11918	2.97	1	1	1
GOTERM_BP_5	GO:0045807~positive regulation of endocytosis	3	7.5	0.0851379	MYO18A, MFF, RAP1GAP	38	157	11918	5.99296	1	1	1
GOTERM_BP_5	GO:0035235~ionotropic glutamate receptor signaling pathway	2	5	0.086323	DLG4, CPEB4	38	29	11918	21.6298	1	1	1
GOTERM_BP_5	GO:0030308~negative regulation of cell growth	3	7.5	0.0898077	SPAG9, MAP2, RBM10	38	162	11918	5.80799	1	1	1
