# Supplementary material for: Autophagy controls the hippocampal postsynaptic organization and affects cognition in a mouse model of Fragile X syndrome
Source: Research Square preprint supplement (doi:10.21203/rs.3.rs-4415392/v1), 2025-08-27
Supplement: Supplementary file 2 [file 2edbd75ebab96e08a5ae0f3d.xlsx]

## Sheet: Sheet1
Description	access.ID	gene.ID
BDNF/NT-3 growth factors receptor	P15209	Ntrk2
Rap1 GTPase-activating protein 1	A2ALS5	Rap1gap
(E3-independent) E2 ubiquitin-conjugating enzyme UBE2O	Q6ZPJ3	Ube2o
WD40 repeat-containing protein SMU1	Q3UKJ7	Smu1
26S proteasome non-ATPase regulatory subunit 6	Q99JI4	Psmd6
Unconventional myosin-XVIIIa	Q9JMH9	Myo18a
Eukaryotic translation initiation factor 4 gamma 1	Q6NZJ6	Eif4g1
Tudor and KH domain-containing protein	Q80VL1	Tdrkh
Zinc finger Ran-binding domain-containing protein 2	Q9R020	Zranb2
C-Jun-amino-terminal kinase-interacting protein 4	Q58A65	Spag9
ATPase family AAA domain-containing protein 3	Q925I1	Atad3
Succinate dehydrogenase [ubiquinone] flavoprotein subunit, mitochondrial	Q8K2B3	Sdha
Peroxiredoxin-2	Q61171	Prdx2
Cytoplasmic polyadenylation element-binding protein 4	Q7TN98	Cpeb4
Signal recognition particle 54 kDa protein	P14576	Srp54
3-mercaptopyruvate sulfurtransferase	Q99J99	Mpst
Microtubule-associated protein 2	P20357	Map2
Glycine amidinotransferase, mitochondrial	Q9D964	Gatm
Heterogeneous nuclear ribonucleoprotein A0	Q9CX86	Hnrnpa0
Sequestosome-1	Q64337	Sqstm1
RNA-binding protein 10	Q99KG3	Rbm10
Mitochondrial fission factor	Q6PCP5	Mff
Leucine-rich repeat-containing protein 59	Q922Q8	Lrrc59
G protein-regulated inducer of neurite outgrowth 3	Q8BWS5	Gprin3
Disks large homolog 4	Q62108	Dlg4
Tetratricopeptide repeat protein 9A	Q3V038	Ttc9
Ras GTPase-activating protein-binding protein 2	P97379	G3bp2
Cystathionine beta-synthase	Q91WT9	Cbs
Trimeric intracellular cation channel type A	Q3TMP8	Tmem38a
PDZ domain-containing protein GIPC1	Q9Z0G0	Gipc1
Basigin	P18572	Bsg
Serine/threonine-protein phosphatase 6 regulatory subunit 1	Q7TSI3	Ppp6r1
Mitochondrial pyruvate carrier 1	P63030	Mpc1
Growth arrest and DNA damage-inducible proteins-interacting protein 1	Q9CR59	Gadd45gip1
Neuron navigator 1	Q8CH77	Nav1
BRISC and BRCA1-A complex member 2	Q8K3W0	Babam2
Methylmalonic aciduria type A homolog, mitochondrial	Q8C7H1	Mmaa
Mitochondrial inner membrane protein OXA1L	Q8BGA9	Oxa1l
ATP-binding cassette sub-family D member 2	Q61285	Abcd2
IgLON family member 5	Q8HW98	Iglon5
Monocarboxylate transporter 2	O70451	Slc16a7
Neuromodulin	P06837	Gap43
