# Supplementary material for: Autophagy controls the hippocampal postsynaptic organization and affects cognition in a mouse model of Fragile X syndrome
Source: Research Square preprint supplement (doi:10.21203/rs.3.rs-4415392/v1), 2025-08-27
Supplement: Supplementary file 3 [file 314078abbcc1699cd1b1b4a3.xlsx]

## Sheet: Sheet1
Description	Accession	Gene	MW [kDa]	# Peptides	Coverage [%]	# PSMs	# AAs	Score Sequest HT	WT-1	WT-2	WT-3	WT-4	FXS-1	FXS-2	FXS-3	FXS-4	WT + CQ-1	WT + CQ-2	WT + CQ-3	WT + CQ-4	FXS+Ril-1	FXS+Ril-2	FXS+Ril-3	FXS+Ril-4
(E3-independent) E2 ubiquitin-conjugating enzyme UBE2O	Q6ZPJ3	Ube2o	140.7	33	37.9658	52	1288	184.98	6576.7	6326.1	6479.4	6562.1	6635.5	6633	6618.8	6681.8	6798.9	6755.5	6712.4	6808	6582.8	6605.5	6508.2	6468.3
(Lyso)-N-acylphosphatidylethanolamine lipase	Q8VD66	Abhd4	38.8	5	17.5439	5	342	10.39	260.3	281.6	263	277.2	265.5	265.6	273.7	279.5	249.8	267.5	257.9	260	252.7	272.9	252.1	260.8
[3-methyl-2-oxobutanoate dehydrogenase [lipoamide]] kinase, mitochondrial	O55028	Bckdk	46.6	2	6.06796	3	412	13.97	711.6	724.6	703.7	766	707	714.8	691.1	701.8	712.8	713.7	731.7	725.5	694	680.1	723.5	689.8
[F-actin]-monooxygenase MICAL3	Q8CJ19	Mical3	223.6	25	14.6513	28	1993	73.22	3549.8	3587.2	3718.6	3741.5	3734.7	3954.5	3825.8	3727.3	3468.6	3434.2	3570.1	3530.8	3792.7	3664.9	3770.6	3885.3
[Protein ADP-ribosylarginine] hydrolase	P54923	Adprh	40	13	48.895	25	362	88.1	3259.4	3245.6	3247.1	3284.5	3271.9	3178.4	3212.8	3202.5	3365.8	3375.6	3434.7	3447.5	3261.6	3265.3	3212.5	3294.4
[Pyruvate dehydrogenase (acetyl-transferring)] kinase isozyme 1, mitochondrial	Q8BFP9	Pdk1	49	14	32.7189	18	434	53.48	2246	2150.6	2192.7	2262	2139.7	2093	2130.6	2072.8	2152.8	2170.9	2222.3	2095.1	2133.7	2067.8	2096.3	2149.1
[Pyruvate dehydrogenase (acetyl-transferring)] kinase isozyme 2, mitochondrial	Q9JK42	Pdk2	46	13	37.8378	18	407	60.07	1452.6	1445.7	1446.8	1509.5	1398.8	1422.2	1408.6	1409.3	1425.1	1295	1442.5	1283.8	1432.7	1337.2	1310	1289.9
[Pyruvate dehydrogenase (acetyl-transferring)] kinase isozyme 3, mitochondrial	Q922H2	Pdk3	47.9	15	44.3373	19	415	61.17	2802.9	2865.2	2861.2	2895.3	2642	2703.8	2657.3	2738.4	2620.6	2559.5	2531.5	2542.8	2618.1	2632.9	2640.9	2597.9
[Pyruvate dehydrogenase [acetyl-transferring]]-phosphatase 1, mitochondrial	Q3UV70	Pdp1	61.1	12	25.2788	13	538	35.42	1840.6	1803.9	1792	1827.9	1740.7	1732	1767.1	1760.5	1788.9	1897.3	1847.4	1898.4	1759.4	1798.1	1768.2	1778.2
1,2-dihydroxy-3-keto-5-methylthiopentene dioxygenase	Q99JT9	Adi1	21.5	7	48.0447	7	179	20.83	1319.9	1321.9	1390.8	1393.6	1355.1	1400	1352.4	1343.6	1303.4	1295.6	1346.2	1341.5	1370.9	1375.4	1389.5	1424.1
1,4-alpha-glucan-branching enzyme	Q9D6Y9	Gbe1	80.3	13	22.6496	16	702	45.95	1305.3	1353.2	1377.3	1409	1366.7	1462.2	1375.8	1425.8	1445.4	1376.7	1441	1432.9	1398.7	1379.5	1385.4	1332.9
1,5-anhydro-D-fructose reductase	Q9DCT1	Akr1e2	34.4	6	21.5947	8	301	22.96	902.9	897.8	948.8	930.6	917.2	933	936	909.8	915.1	851.8	923.1	898	887.7	920.2	926.1	945.8
10 kDa heat shock protein, mitochondrial	Q64433	Hspe1	11	14	88.2353	52	102	141.77	11175.4	11263.2	10900.4	10944.4	11413.3	11412.5	11388.9	11454.1	10710.5	10598.2	11040.2	10558.5	11248.5	11178.2	10895	11182.1
116 kDa U5 small nuclear ribonucleoprotein component	O08810	Eftud2	109.3	30	44.6962	46	971	144.18	3443.8	3593.9	3649.3	3606.9	3638.5	3690.7	3579.7	3557.6	3693.7	3729.9	3680.1	3845	3579	3525.7	3532.9	3528.4
14 kDa phosphohistidine phosphatase	Q9DAK9	Phpt1	14	11	72.5806	23	124	54.99	3092.3	3128.2	3121.2	3125.1	3103	3058.8	3000.2	3161.8	3026.7	2944	3318.1	3167.1	3127.5	2989	3011.5	3407.4
14-3-3 protein beta/alpha	Q9CQV8	Ywhab	28.1	22	75.6098	170	246	367.05	4200.9	4052.7	4151.3	3990.4	4078.1	3898	4125.6	4082.9	4173.5	4250.7	4240.2	4184.2	4193.2	4281	4162.7	4223.6
14-3-3 protein epsilon	P62259	Ywhae	29.2	31	78.8235	224	255	564.89	32188.7	32909.8	31982.2	31959.6	31340.6	30127.9	31933.6	31664.9	31837.6	31948.5	31760.7	31042.4	33054.2	33212.6	31542.2	32938.8
14-3-3 protein eta	P68510	Ywhah	28.2	27	75.2033	198	246	421.45	15121.7	14354.1	14730.3	13966.8	14569.7	14567.1	14597.2	14679.3	15460.8	15563.5	15159.7	15446.2	15089.6	15040.1	14747.6	14870.8
14-3-3 protein gamma	P61982	Ywhag	28.3	29	90.2834	203	247	458.17	17965.6	17304.4	17925.6	17081.2	18180.3	18258.9	18235.1	18379.6	18240.2	18325.4	18887.3	18342	19231.4	18582.9	18403.1	18648.2
14-3-3 protein theta	P68254	Ywhaq	27.8	30	81.2245	210	245	431.56	12410.7	12618.6	12437.4	12623.2	12211.3	12011.6	12522.5	12499.6	12933.6	13271.5	13138	13359	12753.2	12781.2	12564.8	12930.4
14-3-3 protein zeta/delta	P63101	Ywhaz	27.8	31	80.8163	371	245	816.55	34944.3	34679.3	34305.5	34531.9	34578.8	34757	35668.8	34879.5	35035.4	34961.7	34956.2	34802.2	36386.2	36321.9	34731.9	35354.9
182 kDa tankyrase-1-binding protein	P58871	Tnks1bp1	181.7	50	39.5349	61	1720	187.28	6531.3	6656.2	6697.8	6525.9	6655.1	6726.8	6687.8	6626.5	6933.5	6571.6	6369.3	6802.8	6409.1	6495	6419.5	6387
1-acyl-sn-glycerol-3-phosphate acyltransferase alpha	O35083	Agpat1	31.7	6	29.4737	7	285	14.12	528.6	528.2	555	543.9	538.7	528.9	537.6	534.8	547.2	594.3	528.9	548.9	504.4	529.2	544	531.3
1-acyl-sn-glycerol-3-phosphate acyltransferase delta	Q8K4X7	Agpat4	43.8	11	27.7778	13	378	35.69	1293.6	1305.7	1321.8	1363.1	1307	1272.5	1333.4	1345.3	1382.6	1342.8	1382.9	1424.9	1294.7	1372	1334.6	1333.6
1-acyl-sn-glycerol-3-phosphate acyltransferase epsilon	Q9D1E8	Agpat5	42.2	7	24.6575	9	365	29.94	1150.1	1168.8	1159.6	1172.4	1226.7	1140	1198.3	1181.9	1231.9	1277.2	1311.1	1302.8	1192.4	1200.9	1188.2	1176.8
1-acyl-sn-glycerol-3-phosphate acyltransferase gamma	Q9D517	Agpat3	43.3	10	28.7234	12	376	33.61	1566.3	1575.4	1535.6	1568.8	1536	1534.4	1589.6	1582.8	1585.9	1647.2	1627.8	1702.7	1522.4	1536.8	1544.9	1523.3
1-phosphatidylinositol 3-phosphate 5-kinase	Q9Z1T6	Pikfyve	236.7	4	2.28898	4	2097	8.39	467	509.9	490.2	500.6	456.4	477.2	449.4	509.2	408.5	424.1	390	438.6	395	426.8	437	438.3
1-phosphatidylinositol 4,5-bisphosphate phosphodiesterase beta-1	Q9Z1B3	Plcb1	138.3	74	62.3355	154	1216	515.17	25143.7	24958.4	25426.8	24955.1	24781.1	24920.6	25389.3	25523	24430.5	24394	23312	23931.9	24465.5	25258.9	24439.7	24197
1-phosphatidylinositol 4,5-bisphosphate phosphodiesterase beta-3	P51432	Plcb3	139.4	9	8.67099	13	1234	28.83	701.6	721.2	708.5	680	653.8	724.7	659.1	681.7	650.5	648.3	661.7	689.7	658.9	657	653.1	680.2
1-phosphatidylinositol 4,5-bisphosphate phosphodiesterase delta-1	Q8R3B1	Plcd1	85.8	11	19.1799	12	756	44.53	1189.1	1267.3	1253	1243.7	1160.9	1111.9	1131.8	1168.8	1150.6	1110.3	1092.9	1086.9	1150.9	1152.2	1225.2	1259.9
1-phosphatidylinositol 4,5-bisphosphate phosphodiesterase eta-2	A2AP18	Plch2	164.2	17	12.525	23	1501	66.88	3390.5	3280	3350.6	3376.9	3334.7	3279.3	3437.8	3397	3364.6	3266.9	3244.9	3306.3	3335.9	3433.3	3373.1	3362.4
1-phosphatidylinositol 4,5-bisphosphate phosphodiesterase gamma-1	Q62077	Plcg1	149.6	17	18.51	20	1302	47.48	1815	1821.3	1837.5	1796.5	1794.1	1803.2	1804.8	1819.4	1748.2	1859.4	1693.7	1889.6	1762.9	1768.8	1800.5	1791.5
2',3'-cyclic-nucleotide 3'-phosphodiesterase	P16330	Cnp	47.1	54	86.4286	291	420	857.88	50427.8	51492.7	52652.5	56795.3	46291	51267.2	57476.5	53856.2	48575	43766.2	36071.7	43448.3	53399.3	56361.6	55466.9	59055.5
2,4-dienoyl-CoA reductase, mitochondrial	Q9CQ62	Decr1	36.2	9	35.8209	15	335	49.79	1955.8	1991.7	1899.7	2009.8	1794.1	1756.2	1720.3	1774.2	1808.7	1892.1	1955.1	1742.2	1664	1686	1820.9	1849.9
2',5'-phosphodiesterase 12	Q3TIU4	Pde12	67.5	5	10.0329	5	608	10.85	656.4	657.1	662.9	635.7	668.2	669.2	635.8	687.7	600.7	615.4	630.5	643.7	612.1	630.3	639.6	620.4
26S proteasome non-ATPase regulatory subunit 1	Q3TXS7	Psmd1	105.7	35	46.6946	69	953	218.72	7398	7233.1	7375.6	7465.1	7505	7516.8	7514.6	7529.1	7617.9	7862.2	7871.5	8094.7	7463.7	7511.5	7557.9	7484.9
26S proteasome non-ATPase regulatory subunit 11	Q8BG32	Psmd11	47.4	24	62.3223	38	422	126.72	5082.3	5122	5075.5	5056.3	5127.5	5055	5084	5173.3	5291.1	5448.6	5370.6	5455.2	5066.6	5180.2	5122.2	5076
26S proteasome non-ATPase regulatory subunit 12	Q9D8W5	Psmd12	52.9	20	47.3684	27	456	94.18	4670.3	4950.3	4705.3	4975.7	4632	4540.8	4702.3	4729.8	4868.9	5038.3	5076	4901.6	4666.4	4952.2	4835.4	4918.6
26S proteasome non-ATPase regulatory subunit 13	Q9WVJ2	Psmd13	42.8	15	34.8404	27	376	72.59	2896.7	2971.1	2817.2	3039.9	2885.7	2791	2885.1	2848.1	2998.6	3068.3	2999.1	3117.9	2864.8	2893.7	2917	2944.4
26S proteasome non-ATPase regulatory subunit 14	O35593	Psmd14	34.6	15	59.6774	33	310	64.1	2572.5	2581.7	2587.2	2530.4	2525.9	2488.1	2501.8	2553.5	2689.9	2740.5	2949.9	2781.4	2591	2550.1	2549.4	2577.3
26S proteasome non-ATPase regulatory subunit 2	Q8VDM4	Psmd2	100.1	44	56.9383	64	908	201.29	7979.2	8092.7	8110.1	8077.1	8139.7	8126.2	8158.8	8073.6	8472.2	8673	8644.5	8844.4	8181	8211.1	8256.1	8220.2
26S proteasome non-ATPase regulatory subunit 3	P14685	Psmd3	60.7	25	53.7736	36	530	116.25	5220.5	5418.5	5279.1	5414.4	5362.6	5353.6	5358.9	5494.3	5650.8	5572.2	5680.1	5631.2	5264.4	5435.2	5342.9	5279.6
26S proteasome non-ATPase regulatory subunit 4	O35226	Psmd4	40.7	9	35.9043	21	376	98.3	2948.4	2910.8	2931.2	2884.8	3065.6	3153.3	3024.2	3054.7	3052.3	3043.6	3237.1	3231.3	3086.5	3007.5	3047.9	3107.7
26S proteasome non-ATPase regulatory subunit 5	Q8BJY1	Psmd5	55.9	17	48.0159	27	504	78.17	2435.1	2504.1	2496.9	2463	2444.4	2388.8	2350.7	2427.6	2486.3	2453.5	2363.4	2436	2389.6	2431.8	2410.2	2354.5
26S proteasome non-ATPase regulatory subunit 6	Q99JI4	Psmd6	45.5	21	44.2159	29	389	84.47	3858.7	3844.3	3835.8	3828.4	3948	3914.4	3974.8	3919.8	3961.1	4044	4009.8	4124.5	3872	3893.5	3873.4	3855.3
26S proteasome non-ATPase regulatory subunit 7	P26516	Psmd7	36.5	13	49.2212	17	321	61.22	1868.5	1839.2	1986.8	1977.5	2001.1	1987.1	1963.7	2024.6	2013.6	2018.2	2084.1	2121.4	1968.1	1992.8	1935.6	1995.5
26S proteasome non-ATPase regulatory subunit 8	Q9CX56	Psmd8	39.9	6	21.813	14	353	35.53	1374.6	1463.2	1368.5	1385.1	1357.7	1308.4	1368.5	1352.8	1461.2	1419.6	1571.2	1452.1	1354	1391.9	1348.2	1388.8
26S proteasome non-ATPase regulatory subunit 9	Q9CR00	Psmd9	24.7	8	42.3423	12	222	41.36	1635.7	1702.5	1679	1663.3	1711	1774.1	1721.2	1717	1679.6	1626.9	1703.7	1721.3	1737.5	1680.3	1678	1720.3
26S proteasome regulatory subunit 10B	P62334	Psmc6	44.1	24	69.4087	46	389	147.46	5916.7	5994.5	5957.7	5933.3	6012.3	5944.7	5994.3	6037.6	6308.8	6286.7	6539.5	6331.3	6093.7	5958.4	6019	6190.6
26S proteasome regulatory subunit 4	P62192	Psmc1	49.2	22	56.1364	43	440	136.87	5130.4	5371	5029.5	5080	5243.7	5136.6	5235.4	5221.2	5383	5478.6	5313.3	5453.5	4952.3	5158.4	5222.6	5196.3
26S proteasome regulatory subunit 6A	O88685	Psmc3	49.5	29	75.7919	62	442	195.04	6657.8	6591.4	6594.5	6600.3	6722.2	6649.9	6705	6717.4	6961.6	6866.2	7065.4	6938.2	6889.3	6728.6	6578.3	6782.7
26S proteasome regulatory subunit 6B	P54775	Psmc4	47.4	31	70.3349	64	418	185.51	5414.2	5344.1	5403.4	5461.6	5677.7	5592	5529.8	5562.2	5648.5	5659.3	5859	5812.8	5486.7	5479.3	5562.1	5537.2
26S proteasome regulatory subunit 7	P46471	Psmc2	48.6	33	74.1339	54	433	184.19	7636.4	7579.7	7619.2	7662.7	7830.3	7763	7758.8	7733.2	7978.9	8068.4	8171.7	8288.2	7787.5	7761.7	7753.6	7958.8
26S proteasome regulatory subunit 8	P62196	Psmc5	45.6	22	59.8522	52	406	168.03	5652.1	5674.8	5727.3	5846.5	5802.9	5691.3	5664.7	5683.6	5987.1	6118.3	6047.7	6121.7	6228.7	5733.4	5810.8	5795.1
28 kDa heat- and acid-stable phosphoprotein	Q3UHX2	Pdap1	20.6	12	48.6188	21	181	58.69	3354.4	3334.2	3349.9	3384.9	3468.5	3679.2	3526.7	3536.9	3585	3450.9	3490.8	3660.5	3585.7	3504.9	3440.4	3526.3
28S ribosomal protein S11, mitochondrial	Q9DCA2	Mrps11	20.2	2	15.7068	2	191	5.82	54.6	60.1	47.4	56.2	49.8	56.1	46.1	47.5	50.7	50.5	51.1	52.8	53.9	44.4	45.7	43.8
28S ribosomal protein S12, mitochondrial	O35680	Mrps12	15.4	2	23.741	2	139	6.85	194.2	194.1	190.7	194.9	198	204.6	198	195	185	203.1	213.4	213.8	211.4	190.1	189.4	196.6
28S ribosomal protein S15, mitochondrial	Q9DC71	Mrps15	29.4	3	14.7287	3	258	9	267	266.7	293.8	268.8	286.1	281	276.3	291.7	301.1	299.5	292.3	310.7	281.7	271.4	277.6	283.4
28S ribosomal protein S16, mitochondrial	Q9CPX7	Mrps16	15.2	2	19.2593	3	135	9.14	343.1	358.1	359.1	355	366.2	371.8	357.1	361.9	337.6	347.6	339.9	343.2	331.6	368.2	370	389.1
28S ribosomal protein S17, mitochondrial	Q9CQE3	Mrps17	13.4	3	31.6667	3	120	11.94	256.3	283.4	280.9	274.1	269.3	272.4	270.4	305.4	281.8	300.3	286	313.6	255.6	292.2	277.3	280.8
28S ribosomal protein S18a, mitochondrial	Q99N85	Mrps18a	22.3	4	21.9388	4	196	10.66	714.6	711.4	738.2	717.4	726.8	714.3	695.7	759	680.8	706.5	676.3	680.4	731.1	684.9	765.4	684.2
28S ribosomal protein S18b, mitochondrial	Q99N84	Mrps18b	28.7	3	13.7795	3	254	10.99	368.3	342.1	395.9	389.4	382.2	380.8	371.6	375	375.6	388.9	377.5	381.2	359.7	373.6	377.2	390
28S ribosomal protein S2, mitochondrial	Q924T2	Mrps2	32.3	3	13.4021	3	291	8.82	320.6	309.8	298.1	306.4	330.5	303.2	312.9	307.3	304.9	306.8	320.6	290.3	291.1	299.4	309.1	297.2
28S ribosomal protein S22, mitochondrial	Q9CXW2	Mrps22	41.2	6	25.0696	7	359	18.73	535.6	539	583.3	529.7	586.8	512.6	561.5	557.3	511.4	564.9	500.4	577.1	502.8	545.7	532.6	549.7
28S ribosomal protein S23, mitochondrial	Q8VE22	Mrps23	20.3	7	53.6723	8	177	23.73	931.3	911.6	972.1	950.7	905.1	923	950.5	936.7	936.1	957.7	1004.8	969.4	909.5	925.3	957.9	970.2
28S ribosomal protein S25, mitochondrial	Q9D125	Mrps25	19.9	3	12.2807	3	171	2.36	449.1	467.6	463.8	461.6	482.1	481.8	472.1	465.9	455.2	473.2	467.9	472.3	463.3	441	456.8	458.9
28S ribosomal protein S26, mitochondrial	Q80ZS3	Mrps26	23.4	6	24	8	200	15.58	751.6	777.5	719.4	791.2	777.2	783.7	727.6	743.1	787.7	781.2	786.9	820.7	737.5	748.6	750.1	744.6
28S ribosomal protein S27, mitochondrial	Q8BK72	Mrps27	47.7	8	21.9277	9	415	24.99	1182.9	1167.4	1230.8	1201.3	1223.6	1279.6	1195.6	1257.7	1208.4	1251.6	1170.3	1275.1	1180.7	1211.6	1220.8	1176.4
28S ribosomal protein S28, mitochondrial	Q9CY16	Mrps28	20.5	3	17.7419	4	186	7.81	350.2	361.2	355	368.4	358	364.7	363.9	381.9	371.1	352.9	376.6	373.1	348.1	379.5	352.7	350.6
28S ribosomal protein S29, mitochondrial	Q9ER88	Dap3	44.7	8	26.087	10	391	20.99	878.6	861	853.8	851.3	855.8	840.3	866.2	887.9	884.8	894.3	863.2	907.4	847.1	855.5	861.3	857.5
28S ribosomal protein S30, mitochondrial	Q9D0G0	Mrps30	49.9	8	26.4706	13	442	33.36	740	742.8	739.9	714	739.5	752.5	718.8	746.2	759.4	762	767.2	780.4	724.9	708.4	710.4	721.6
28S ribosomal protein S31, mitochondrial	Q61733	Mrps31	43.9	7	22.3958	8	384	21.89	683.1	724.7	754	773.2	773.2	791.7	773.4	718.3	774.4	736.4	771.5	798.4	759.6	746.7	748.3	724.2
28S ribosomal protein S34, mitochondrial	Q9JIK9	Mrps34	25.8	7	39.4495	7	218	23.13	958.2	947.9	936.1	963.9	1003.4	1000.5	988.3	973.8	970	1006.1	944.5	993.1	946.7	976	991.2	937.6
28S ribosomal protein S35, mitochondrial	Q8BJZ4	Mrps35	36	6	27.5	6	320	16.2	636.9	647.2	639.5	655.5	654.6	642	645.3	655.7	649.2	661.2	646.3	666.3	634	656.1	673.6	614
28S ribosomal protein S36, mitochondrial	Q9CQX8	Mrps36	11.1	7	81.3725	12	102	39.82	1486.9	1410.4	1490	1490.3	1588.7	1704.9	1618.8	1508.8	1518.7	1403.1	1663.7	1478.1	1677	1488.4	1523.2	1528.9
28S ribosomal protein S5, mitochondrial	Q99N87	Mrps5	48.2	5	11.8056	6	432	15.66	650.4	671	658.9	667.4	700	725.6	661.1	716.7	717.2	719	720.2	778.6	658.9	693.6	693.7	684.1
28S ribosomal protein S6, mitochondrial	P58064	Mrps6	14.3	3	25.6	3	125	9.35	907.6	888.9	876.5	888.3	926.4	853.7	854.6	906.8	941.4	927.2	916.4	976	872	898.2	922	898.7
28S ribosomal protein S7, mitochondrial	Q80X85	Mrps7	28	5	25.2066	5	242	19.14	656.2	659.5	705.4	652.1	723.2	679.7	655.8	638.8	672	709.2	713.7	722.6	634.8	660.7	702.8	665
28S ribosomal protein S9, mitochondrial	Q9D7N3	Mrps9	44.9	7	22.8205	7	390	21.46	546.7	578.8	594.2	573	585.8	567	549.7	618.4	597.8	575.3	577.4	591.7	579.8	589.5	584.3	582.9
2-amino-3-ketobutyrate coenzyme A ligase, mitochondrial	O88986	Gcat	44.9	6	25.7212	11	416	37.76	797.2	830.2	803.4	853.4	810.3	842.5	796.4	823	791.1	776	830.8	779.5	799.6	802.6	834.7	825.5
2-aminoethanethiol dioxygenase	Q6PDY2	Ado	28.4	9	54.2969	11	256	42.58	1184.5	1193.8	1206.2	1189	1226.9	1258.5	1304.2	1260.4	1196.6	1198.5	1200.6	1262.4	1257.8	1221.6	1229.1	1224.2
2-hydroxyacylsphingosine 1-beta-galactosyltransferase	Q64676	Ugt8	61.2	5	10.536	6	541	12.63	408	403.4	410.4	441.5	397.6	429.6	464.4	442.7	660.3	616.6	526.3	858.7	458.6	460.5	465.6	468.6
2-iminobutanoate/2-iminopropanoate deaminase	P52760	Rida	14.2	10	70.3704	22	135	79.81	4281.7	4201.2	3982.8	3677.3	3428.4	3416.1	3498.8	3550.6	3517.2	3184.1	3880.9	3142.2	3608.5	3530.4	3351.7	4020
2-methoxy-6-polyprenyl-1,4-benzoquinol methylase, mitochondrial	Q9CXI0	Coq5	37.3	7	29.6636	7	327	20	649	660.1	684.1	638.6	671.4	648.9	650.6	644.6	611.5	622.1	572.6	582.2	623.3	619	643.3	646.7
2-oxoglutarate dehydrogenase, mitochondrial	Q60597	Ogdh	116.4	53	55.2297	125	1023	428.22	20174.8	20263.8	20121.2	20453.1	20432.9	20066.5	20025.6	20363.7	19624.9	20159.6	19508	19761.7	20037.7	20309.1	20657.3	20160.8
2-oxoisovalerate dehydrogenase subunit alpha, mitochondrial	P50136	Bckdha	50.3	9	33.2579	15	442	54.33	1000.3	1044.8	1062.7	1063.8	1060.1	1022	1002.7	1075.8	1061.4	1015.2	1027.5	1075.1	989.4	961.9	1018.9	1039.7
2-oxoisovalerate dehydrogenase subunit beta, mitochondrial	Q6P3A8	Bckdhb	42.9	7	34.6154	8	390	33.97	797.8	783.7	810.3	810.5	843.5	859.6	816.8	849.6	877.3	837.5	850.8	857.2	835.5	811.8	806.2	822.1
3'(2'),5'-bisphosphate nucleotidase 1	Q9Z0S1	Bpnt1	33.2	17	73.0519	34	308	88.18	3620.2	3652.2	3609.9	3635.5	3545.6	3536.1	3601.3	3559.2	3469.8	3474.9	3425.7	3473.6	3604	3639.8	3658.3	3705.8
3'-5' RNA helicase YTHDC2	B2RR83	Ythdc2	161	5	4.9827	6	1445	18.08	299.1	285.2	281	278.6	272.4	295.9	277.2	254.7	290.5	283	302.4	280.5	282.4	269.5	286.6	272.8
39S ribosomal protein L1, mitochondrial	Q99N96	Mrpl1	37.6	8	27.381	8	336	12.32	836.5	989.9	824.4	862	852.4	855.1	840.4	833	861.2	882	944.8	892.7	802.5	831.7	895	836.2
39S ribosomal protein L10, mitochondrial	Q3TBW2	Mrpl10	29.4	5	30.1527	9	262	34.81	617	606.7	865.1	626.4	635.3	594.5	641.1	607.9	658.1	668.3	656.5	651.5	596	642.8	610.2	612
39S ribosomal protein L11, mitochondrial	Q9CQF0	Mrpl11	20.7	7	36.4583	8	192	23.19	770.9	810.9	833.9	815.6	871	869.1	825.9	866.2	838	814.6	838.1	852.9	799.3	824.7	816.7	811.1
39S ribosomal protein L12, mitochondrial	Q9DB15	Mrpl12	21.7	8	46.7662	14	201	36.12	969.6	952.4	932.3	932.7	992.6	1010	990.5	1020.8	1011.7	999.7	1012.7	1021.1	1006.6	993.8	944.1	961.4
39S ribosomal protein L13, mitochondrial	Q9D1P0	Mrpl13	20.7	6	35.9551	6	178	15.59	691.1	650.5	637.6	649.4	713.6	674.9	703.7	683.5	651.4	699.3	620.9	787.7	641.1	748.2	760.3	730.8
39S ribosomal protein L14, mitochondrial	Q9D1I6	Mrpl14	15.9	3	20	4	145	7.62	535.4	546.2	538.8	558.5	570.4	565.1	544.9	580.3	572.8	575	595.4	629.2	539.6	573.1	580.2	570.4
39S ribosomal protein L15, mitochondrial	Q9CPR5	Mrpl15	33.5	11	45.0847	15	295	38.04	1769	1709.7	1817.6	1799.3	1851.9	1869.6	1796.3	1834.8	1944.6	1950.3	2027.3	2036.4	1811.5	1789.4	1763.2	1757.7
39S ribosomal protein L16, mitochondrial	Q99N93	Mrpl16	28.8	5	20.7171	5	251	10.89	281.4	275.2	286.3	307.7	311.5	319.9	281	303.3	312.7	295.7	291.5	340.2	297.3	297.9	315.9	295.1
39S ribosomal protein L17, mitochondrial	Q9D8P4	Mrpl17	20.2	3	19.3182	3	176	4.59	113.9	110.2	108.3	106.3	114.2	117.3	109.4	110.6	120.9	108	121.4	120.9	119	105.5	101.5	109.2
39S ribosomal protein L19, mitochondrial	Q9D338	Mrpl19	33.6	3	12.3288	5	292	14.96	191.2	176.9	193.3	183	176.4	180.4	166.8	180.9	194.6	185.6	189.6	203.3	171.5	166.7	180.4	179.6
39S ribosomal protein L21, mitochondrial	Q9D1N9	Mrpl21	23.4	4	31.1005	4	209	10.09	571.7	614.4	610.4	613.6	631.1	627.3	597.7	607.8	634.6	613.1	622.8	618.5	590.4	561.3	579.4	583.1
39S ribosomal protein L22, mitochondrial	Q8BU88	Mrpl22	23.8	4	17.4757	4	206	7.17	53.4	40.6	49.8	52.4	45	46.4	46.2	50.5	59.3	53.1	61	55.9	60.5	57.5	58.5	52.7
39S ribosomal protein L23, mitochondrial	O35972	Mrpl23	17.1	4	45.8904	4	146	12.08	330.9	363.5	360.2	336.5	358.1	357.7	356.9	357	337.2	365.2	339.8	375.2	353	385.2	365.3	336.1
39S ribosomal protein L24, mitochondrial	Q9CQ06	Mrpl24	24.9	6	35.1852	7	216	18.64	354.2	380.3	403.1	391.7	358.7	400.6	386.3	393.8	404.2	401.8	415.9	416.5	377.6	387.4	377.5	374.9
39S ribosomal protein L27, mitochondrial	Q99N92	Mrpl27	15.9	2	18.9189	2	148	6.84	352.7	327.1	321	334.7	342.7	345.8	355.3	365.6	348.2	352.5	362.5	368.5	327.8	322.6	333	343.6
39S ribosomal protein L28, mitochondrial	Q9D1B9	Mrpl28	30.2	8	36.5759	10	257	16.97	682.6	705	731	730.7	752.4	731.9	727.2	717.4	758.3	746.3	733.1	793.8	683	723.3	688.4	682.4
39S ribosomal protein L3, mitochondrial	Q99N95	Mrpl3	39.1	4	13.7931	5	348	10.43	72.5	68.7	73.1	62.5	72.3	67.1	70	60.2	75.9	74.8	86.3	79.4	76.6	62.2	69.6	78.6
39S ribosomal protein L30, mitochondrial	Q9D7N6	Mrpl30	18.3	3	15	3	160	0
39S ribosomal protein L37, mitochondrial	Q921S7	Mrpl37	48.3	6	20.331	6	423	16.56	508.7	559.8	549.6	565.9	577.6	555.9	567.3	562	573.7	573.2	556.6	593	549.1	551	539.3	551.6
39S ribosomal protein L38, mitochondrial	Q8K2M0	Mrpl38	45	6	15	6	380	13.75	460.5	481.9	504.9	481.9	470.4	498.3	489.3	507.5	502.7	506.9	510.2	512.4	470	489.2	482.6	514.4
39S ribosomal protein L39, mitochondrial	Q9JKF7	Mrpl39	38.5	11	36.0119	16	336	38.95	1509	1519.4	1481.8	1511.8	1578.4	1574.4	1543.7	1513.1	1624.2	1631.2	1740.3	1717.1	1534.8	1533	1519.4	1515.5
39S ribosomal protein L4, mitochondrial	Q9DCU6	Mrpl4	33.1	5	26.8707	5	294	13.18	149.9	142.5	162.3	140.2	159.4	144	156.5	144.2	149.3	159.6	142.8	167.7	154.8	159.1	153.2	139.4
39S ribosomal protein L40, mitochondrial	Q9Z2Q5	Mrpl40	24.3	3	18.932	5	206	12.33	407.3	398.9	410.7	402.6	445.2	436.7	433.6	428.7	439.8	430.3	436.5	482.3	404.1	419.5	408.3	438.9
39S ribosomal protein L41, mitochondrial	Q9CQN7	Mrpl41	15.3	5	42.2222	8	135	18.77	814.9	813.8	827.7	824.7	887.9	859.3	830.8	854.5	811.5	827.9	847.4	888.5	829	810.8	821	850.4
39S ribosomal protein L43, mitochondrial	Q99N89	Mrpl43	20.2	4	16.9399	4	183	9.42	853.9	890	789.8	813	855.8	826.3	833.2	840.2	842.3	865.9	882.1	874.7	808.8	813.2	854.6	819.7
39S ribosomal protein L44, mitochondrial	Q9CY73	Mrpl44	37.5	6	23.1231	6	333	14.77	801.5	814.8	847.7	851.6	844.6	853.3	818.5	872.1	872.4	930	870.2	954.1	813.4	842.7	849.3	818.1
39S ribosomal protein L45, mitochondrial	Q9D0Q7	Mrpl45	35.4	4	19.6078	5	306	15.95	893.5	924.7	855.9	871.9	914.9	839.5	913.4	874.5	924.2	918.4	964.6	939.1	890.8	899.4	867.8	901.6
39S ribosomal protein L46, mitochondrial	Q9EQI8	Mrpl46	32.1	6	26.1484	6	283	17.9	875.9	854.4	855.6	862	890.2	873.7	883.8	866.2	898.3	888.4	937.1	925.4	854.6	873.3	870.6	867.5
39S ribosomal protein L47, mitochondrial	Q8K2Y7	Mrpl47	29.7	2	9.12698	2	252	5.25	220.5	215.4	238.4	232.3	258.7	254.7	235.5	245.7	266.8	236.2	284.3	270.2	246.1	226.4	253.8	240.7
39S ribosomal protein L49, mitochondrial	Q9CQ40	Mrpl49	19.1	4	35.5422	4	166	10.94	230.1	213	226.3	204	231.3	224	209	232.4	229.1	236.2	230.6	235.9	213.9	235.3	235.3	226.8
39S ribosomal protein L53, mitochondrial	Q9D1H8	Mrpl53	12.7	2	15.2542	2	118	4.82	189	189	200.6	177.8	201	219	219.7	212.5	205.9	181.1	209.5	216.4	188.2	187.6	187.4	190.5
39S ribosomal protein L54, mitochondrial	Q9CPW3	Mrpl54	15.4	2	20.7407	3	135	5.97	317.2	326.8	343.1	327	332.7	344.6	331.9	353.5	336.5	358.2	366.4	361	343.6	327.6	334.1	360
39S ribosomal protein L55, mitochondrial	Q9CZ83	Mrpl55	15.1	3	31.4961	3	127	12.45	205.3	214.7	206.3	205	207.6	213.9	202.5	214.8	197	217.1	207.9	211.8	197	216.3	213.4	207.6
39S ribosomal protein L9, mitochondrial	Q99N94	Mrpl9	30.2	2	7.54717	3	265	6.98	453.3	445.4	430.3	434.1	466.5	477.6	469	437	442.5	420	408.2	456.5	437.3	459.1	440	459.8
3-hydroxyacyl-CoA dehydrogenase type-2	O08756	Hsd17b10	27.4	12	55.9387	24	261	93.75	2155.6	2135.4	2157.6	2126.6	2165.5	2029.7	2067.6	2061.2	2180.5	2149.9	2215.9	2152	2115.6	2081.5	2152.5	2179.8
3-hydroxyisobutyrate dehydrogenase, mitochondrial	Q99L13	Hibadh	35.4	14	50.4478	23	335	92.78	3690.5	3665.8	3712.5	3698.1	3763.8	3689	3623.2	3503.9	3439.7	3319.2	3561	3305.9	3688.7	3604	3726.6	3665.8
3-hydroxyisobutyryl-CoA hydrolase, mitochondrial	Q8QZS1	Hibch	43	24	68.3117	43	385	109.22	4297.6	4285.8	4175.4	4252	4068.8	4017.9	3995.3	4078.5	3931.7	3878.4	3788.8	3751.7	3847.7	3909.4	4082.9	3994.3
3-ketoacyl-CoA thiolase A, peroxisomal	Q921H8	Acaa1a	43.9	14	52.8302	27	424	119.5	2589.2	2679.3	2628.3	2718.4	2688.8	2729.4	2787.9	2687.5	2920.5	2734.3	2838.5	2976.5	2756.2	2740.3	2690.2	2752.7
3-ketoacyl-CoA thiolase, mitochondrial	Q8BWT1	Acaa2	41.8	30	84.6348	71	397	283.7	9214.4	9913.5	9283.7	10011.7	8842.6	8561.4	8281.3	8378.6	9813	8599.3	8933.8	8956.2	8130	8357.5	9406.5	9582.4
3-ketodihydrosphingosine reductase	Q6GV12	Kdsr	35.9	3	7.83133	4	332	5.98
3-mercaptopyruvate sulfurtransferase	Q99J99	Mpst	33.1	14	54.2088	29	297	102.94	3558.2	3682	3642	3803.8	3886	3939.2	3797.9	3797.4	3992.1	3891.9	4121.2	4042.7	3818.2	3674.7	3718.5	3716.8
3-oxoacyl-[acyl-carrier-protein] synthase, mitochondrial	Q9D404	Oxsm	48.6	5	15.9041	5	459	9.66	423.7	462.2	451.7	449.1	454	487	430.9	468.1	399.3	395.4	402.1	405.5	412.4	428.9	454.4	422.1
3-phosphoinositide-dependent protein kinase 1	Q9Z2A0	Pdpk1	63.7	13	27.0125	21	559	69.37	2114.6	2178.9	2183.6	2190.1	2109.7	2064.5	2147	2098.7	2181	2145.3	2113.5	2174.2	2075.3	2107.8	2127.8	2130.5
40S ribosomal protein S10	P63325	Rps10	18.9	16	71.5152	39	165	92.94	4107.9	4134.4	4201.6	4187.9	4297.4	4138.9	4230.8	4190.4	4578.7	4541.2	4386.6	4647.2	4064.9	4250.7	4224.1	4157
40S ribosomal protein S11	P62281	Rps11	18.4	9	49.3671	17	158	60.86	5740.6	5661	5678.3	5776.9	5748.4	6060.7	5798.2	5980.7	6251.3	6193.4	5908.9	6444.3	5668.7	5934.1	5956	5698.6
40S ribosomal protein S12	P63323	Rps12	14.5	8	49.2424	18	132	57.34	2956.7	2902.2	2959.8	3042.1	3076.9	3117	3095.7	3075.7	3391.8	3256.3	3632	3452	3305.2	3105.4	3095.8	3206.1
40S ribosomal protein S13	P62301	Rps13	17.2	16	70.8609	36	151	77.37	5713.3	5600.7	5696.1	5873	5769.1	6009.3	5912.4	6002.4	6254.1	6377.9	6016.8	6585.1	5777.8	5974.6	6038.5	5769.2
40S ribosomal protein S14	P62264	Rps14	16.3	9	45.6954	14	151	51.95	1899.7	1900.8	1891.4	1896.9	2027.5	1989.9	1995.7	1919.7	2065.2	2050.9	2161.6	2173.6	2016.7	1970.6	2021.3	1987
40S ribosomal protein S15	P62843	Rps15	17	6	42.069	23	145	35.81	1533.3	1442.3	1515.1	1547.7	1579.9	1620.5	1668.1	1519.6	1887.8	1785.7	2031.6	1797.6	1774.1	1584.1	1572.4	1602.5
40S ribosomal protein S15a	P62245	Rps15a	14.8	13	72.3077	23	130	66.9	3795.4	3996.4	3900.1	3975	3937.3	4011.3	3814.2	3989.6	4195.7	4227.3	4145.5	4566.7	3896.2	3964.2	4014.2	3952.6
40S ribosomal protein S16	P14131	Rps16	16.4	17	73.2877	24	146	65.47	2363	2607.4	2367	2542.6	2439.6	2429.5	2450.9	2442	2627.4	2675.1	2677.4	2762.7	2444.5	2542.5	2514.9	2510.9
40S ribosomal protein S17	P63276	Rps17	15.5	11	65.9259	36	135	122.44	4112.5	4269.1	4286.6	4217	4394.7	4509.7	4309.1	4301.9	4821.4	4794.5	4884.9	5026.3	4404.6	4298.3	4233	4303.2
40S ribosomal protein S18	P62270	Rps18	17.7	12	59.8684	19	152	47.59	3360.4	3330	3368.6	3373.6	3437.9	3405.6	3419.8	3358.2	3689.4	3649.9	3664.8	3795.3	3385.6	3465.9	3481.6	3425.9
40S ribosomal protein S19	Q9CZX8	Rps19	16.1	14	62.7586	32	145	97.39	7376.1	7129	7269.9	7318.9	7587.7	7767.2	7702.7	7509.7	8330.6	8119.7	8366.3	8541.9	7744.7	7636.2	7656.2	7521.5
40S ribosomal protein S2	P25444	Rps2	31.2	21	60.7509	42	293	110.07	6985.5	7061.7	6811.6	6929.8	7056	6961.9	7022.6	7026.3	7621	7847.3	7482.4	7890.4	6854.2	7202.9	7236.3	6891.6
40S ribosomal protein S20	P60867	Rps20	13.4	5	36.1345	12	119	35.01	1860.9	1813	1911.3	1833.6	1967	1904.2	1876.3	1868.5	2092.1	2070.5	2036.7	2141	1937.4	1905.5	1901.6	1929
40S ribosomal protein S21	Q9CQR2	Rps21	9.1	6	63.8554	12	83	33.15	2187.1	2186.5	2104.1	2142.3	2276.6	2345.1	2196.8	2234.9	2403	2372.9	2622.5	2496.4	2393	2240.9	2230.7	2305.7
40S ribosomal protein S23	P62267	Rps23	15.8	10	58.7413	17	143	55.65	1577.9	1510	1502.3	1577.1	1538.4	1553.3	1557.8	1516.4	1735.8	1716	1706	1719.9	1574.5	1606.8	1500.7	1506.7
40S ribosomal protein S24	P62849	Rps24	15.4	6	39.8496	10	133	31.15	844	779.5	776.1	773.6	771.1	776.7	778.9	734.1	906.5	869.1	922	861.1	800.5	798.8	734	766.5
40S ribosomal protein S25	P62852	Rps25	13.7	7	44.8	15	125	36.58	2044.1	2028.7	2080.2	2088.5	2099.5	2200	2118.7	2205.2	2318.8	2308.3	2299.3	2497.2	2114.6	2169.9	2130	2197.9
40S ribosomal protein S26	P62855	Rps26	13	4	44.3478	6	115	21.74	1009.4	1011.2	1113.8	1057.2	1025.6	1093.7	1017	1100.9	1142.4	1089.7	1099.1	1154.7	1040.8	1092.8	1024.1	1075.2
40S ribosomal protein S27	Q6ZWU9	Rps27	9.5	4	40.4762	9	84	21.91	1459.6	1494.2	1530.9	1490	1607	1648.4	1574.3	1551.6	1722.7	1592.4	1746.9	1748.4	1614.3	1526.6	1542.3	1513.1
40S ribosomal protein S27-like	Q6ZWY3	Rps27l	9.5	3	38.0952	6	84	18.44	151.7	175.6	187.6	195.1	171.3	206.1	189.1	195	228.2	186.4	203.7	217.2	184.4	176.4	168.9	190.2
40S ribosomal protein S28	P62858	Rps28	7.8	4	52.1739	16	69	47.87	1603.2	1546.9	1551.5	1544.5	1610	1609.9	1560.4	1601.8	1665.7	1650.3	1768.7	1723	1645.8	1539.5	1604.9	1616
40S ribosomal protein S29	P62274	Rps29	6.7	6	41.0714	9	56	14.49	1264.4	1209.6	1191.8	1255.2	1284.9	1247.6	1242.1	1232.2	1333.2	1337.4	1388	1351.7	1272.6	1244.5	1288	1255.3
40S ribosomal protein S3	P62908	Rps3	26.7	22	80.6584	54	243	185.34	8692.9	9366.5	9012.1	9331.2	9120.7	9124.9	9087.1	9094.8	10188	9978.4	10289.7	10309.8	9277.9	9096.7	9101.2	9180.1
40S ribosomal protein S30	P62862	Fau	6.6	2	18.6441	3	59	8.35	1011.2	904	944	949.6	1019.2	1081.1	1081	1024.1	1139.5	1048.2	1179.6	1137.3	1061.2	1019.7	998	1040.8
40S ribosomal protein S3a	P97351	Rps3a	29.9	27	71.9697	55	264	176.2	8339.2	8332	8606.6	8857.2	8898	9431.3	8942.2	8958.3	9571.4	9366.3	9551.1	9963.5	8828.7	8722.2	8890.4	8749.8
40S ribosomal protein S4, X isoform	P62702	Rps4x	29.6	27	72.6236	45	263	127.71	7344	7284.5	7153	7240.2	7310.8	7039.3	7398.3	7257.6	7985.1	8369.5	7899.3	8553.4	7144.1	7475.3	7593.6	7537.7
40S ribosomal protein S5	P97461	Rps5	22.9	8	38.7255	17	204	52.91	2340	2329.1	2308.8	2337.5	2376.9	2512	2353.9	2395.1	2579.4	2535.6	2425	2731	2366	2349.3	2428.9	2249.7
40S ribosomal protein S6	P62754	Rps6	28.7	9	25.7028	15	249	40.83	2030.9	1833.6	1893.8	1868.8	1900.8	1966.9	2024.7	2021	2204.3	2115.5	2429.2	2279	2046.2	2010	1977.8	2119.4
40S ribosomal protein S7	P62082	Rps7	22.1	15	67.5258	40	194	114.01	5253.4	5311.4	5285.9	5348.5	5325.5	5292.2	5225.1	5344	5837.2	5977.5	5892.8	6044.7	5345.7	5245.8	5419.7	5505.3
40S ribosomal protein S8	P62242	Rps8	24.2	10	57.6923	19	208	60.18	2830.8	2419.8	2626.9	2651.8	2651	2710.9	2796.3	2781.1	2918.7	2840.4	3140	3134.9	2880.4	2684.7	2705.6	2807.9
40S ribosomal protein S9	Q6ZWN5	Rps9	22.6	13	56.701	20	194	48.87	3958.5	4006.2	3930.3	3917.3	3889.6	3915.5	3907.9	3984.4	4300.7	4204.8	3991.7	4222.6	3745.3	4011.1	3977.5	3896.3
40S ribosomal protein SA	P14206	Rpsa	32.8	13	55.5932	24	295	92.7	3696.7	3872	3707.6	3784.4	3763.2	3692.6	3725.4	3761.2	4292	4220.8	4421	4340.9	3887.1	3840.4	3857.2	3983.4
45 kDa calcium-binding protein	Q61112	Sdf4	42	3	14.6814	3	361	5.27	17	23.5	19.7	14.9	14.8	13.3	17.2	18.4	16	18.4	15	17.4	12.3	16.7	11.3	16.2
4-aminobutyrate aminotransferase, mitochondrial	P61922	Abat	56.4	35	80.2	119	500	466.45	15626.4	15688.1	16069.7	16605.5	16071.6	16396.4	15891.5	16056.4	15427	15777.2	16134.1	15022	15769.3	15987.5	15837	15570
4F2 cell-surface antigen heavy chain	P10852	Slc3a2	58.3	28	45.6274	58	526	188.29	11745.8	11635.1	11555.3	11549.5	11643.6	11244.7	11326.2	11699.4	11057.8	11582.7	11225.6	11055.4	11342.5	11475.7	11914.7	11541.3
4-trimethylaminobutyraldehyde dehydrogenase	Q9JLJ2	Aldh9a1	53.5	22	57.2874	39	494	137.64	5094	5075.7	5141.7	5361.5	4934.3	4965.8	4817.5	4988.7	4682.5	4653.4	4696.8	4550.2	4797.1	4859.8	5061.5	5012.3
5'(3')-deoxyribonucleotidase, cytosolic type	Q9JM14	Nt5c	23.1	9	63	25	200	89.85	2603.9	2561.5	2628.3	2668.6	2682.5	2659.1	2631.9	2667	2473.9	2483.6	2657.9	2381.1	2738.5	2560.6	2539.3	2686.1
5'(3')-deoxyribonucleotidase, mitochondrial	Q8VCE6	Nt5m	25.6	6	35	8	220	32.75	542.9	606.2	591.3	589.7	579.8	552.1	577.4	581.4	568.6	567	551.1	517.8	558	583.3	550.6	552.8
5'-3' exoribonuclease 1	P97789	Xrn1	194.2	3	1.91972	4	1719	7.8	370.2	380.2	357.5	374.5	363.1	369.4	338.6	341.8	377.1	344.1	361.2	366.6	360.5	342.6	369.5	339.7
5'-3' exoribonuclease 2	Q9DBR1	Xrn2	108.6	10	13.775	12	951	21.23	608.6	608.2	603.2	594.6	619.1	608.8	608.4	607.7	560.5	598.1	570.7	621.2	569.5	575.6	625.9	594.9
55 kDa erythrocyte membrane protein	P70290	Mpp1	52.2	15	46.1373	23	466	66.14	2749.7	2727.6	2777	2747.8	2778.6	2719.4	2799.5	2743.3	2593.6	2513	2524.4	2540.4	2741.9	2694.1	2649.7	2806.5
5'-AMP-activated protein kinase catalytic subunit alpha-1	Q5EG47	Prkaa1	63.9	12	25.0447	15	559	48.28	1734.9	1704.9	1707	1717.5	1694.6	1668.7	1688.5	1690	1702.8	1656.6	1685.4	1700.9	1658.6	1625.7	1617.3	1606.7
5'-AMP-activated protein kinase catalytic subunit alpha-2	Q8BRK8	Prkaa2	62	8	17.2101	11	552	28.27	502.1	498.7	481.1	469.8	473.1	490.5	486.7	487.5	474.9	488	489.2	465.8	470.9	455.7	487.8	484.9
5'-AMP-activated protein kinase subunit beta-1	Q9R078	Prkab1	30.3	2	18.1481	2	270	10.28	213.1	242.1	252	267.7	255.5	239.2	240.3	257.6	242	232.4	256.8	231.9	272	239.7	252.8	247.2
5'-AMP-activated protein kinase subunit beta-2	Q6PAM0	Prkab2	30.2	3	18.8192	4	271	16.28	521.1	503.6	525.5	518.9	507.5	488.7	503.5	519	513	524.3	525.2	500.6	504.7	497.9	501.3	530.4
5'-AMP-activated protein kinase subunit gamma-2	Q91WG5	Prkag2	62.9	8	18.7279	10	566	25.37	728.9	729.1	712.8	711.6	699	669	695.5	721.8	693.5	685.3	687.5	694.6	699.2	680.2	713.8	707.4
5-demethoxyubiquinone hydroxylase, mitochondrial	P97478	Coq7	24	4	22.5806	5	217	16.28	887.4	835.1	876.7	889.2	872.7	844.9	836.4	869.9	790.2	812.1	747.7	774.4	827.6	815	845.8	811.1
5'-nucleotidase	Q61503	Nt5e	63.8	2	7.11806	2	576	6.45	69.8	75.7	82.2	91.9	83	89.9	79.5	78.9	69.6	71.2	79.7	78.8	84.4	68.8	88.7	77.3
5'-nucleotidase domain-containing protein 3	Q3UHB1	Nt5dc3	63.1	21	43.5897	32	546	96.98	4948.7	4787.3	4813.3	4536.8	4573.7	4230.9	4495.3	4566.7	4760.7	4708.3	4359.4	4635.1	4493.8	4804.3	4629.3	4643.2
5-oxoprolinase	Q8K010	Oplah	137.5	29	31.1335	33	1288	111.03	4137	4052.3	4135.8	4177.2	4038.8	3932.9	3946.1	3983.3	4059	4084.6	4092.4	3936.2	3885.4	3947.4	3990.4	3958.9
60 kDa heat shock protein, mitochondrial	P63038	Hspd1	60.9	54	84.4677	330	573	1148.98	35551.4	34731.9	35433.6	34986.1	36242.9	36494.5	35806.9	35837.9	36066.6	35970.5	35638.8	35367.3	35629.2	35764.7	35753.8	35722.1
60 kDa SS-A/Ro ribonucleoprotein	O08848	RO60	60.1	13	28.4387	18	538	52.08	1987.8	2044.5	1997.9	2045.2	2066.1	1967.7	2016.4	2012.5	1995.6	2091.7	2022.6	2061.3	2009.9	2075.1	2088.7	2095.3
60S acidic ribosomal protein P0	P14869	Rplp0	34.2	17	50.1577	35	317	115.29	4407.4	4443.4	4423	4525.1	4473	4142.4	4366.7	4374.8	4814	5044.4	5072.7	4984.7	4489.6	4484.5	4490.7	4525.6
60S acidic ribosomal protein P1	P47955	Rplp1	11.5	3	66.6667	14	114	52.57	935	947.1	945.7	981.5	951	974.6	977.5	954.4	1124.8	1103.2	1117	1113.2	1067.8	1001.1	952	942.8
60S acidic ribosomal protein P2	P99027	Rplp2	11.6	9	95.6522	30	115	132.75	5516.6	5485.5	5374.7	5390.4	5741.4	5798.5	5565.8	5794.4	6069.6	6101.9	6418.7	6498.3	5911.2	5674.6	5813.8	5883.3
60S ribosomal protein L10	Q6ZWV3	Rpl10	24.6	13	55.6075	27	214	107.64	4298.3	4065.4	4126.3	4270.6	4337.2	4516.8	4459.8	4492.2	4646.6	4664.5	4638	4795.9	4376.6	4366.6	4368.4	4265
60S ribosomal protein L10a	P53026	Rpl10a	24.9	13	44.7005	31	217	80.45	4101	3994.5	4018.7	4161.5	4250.7	4284.5	4196.3	4246.4	4739.2	4564.3	4620.3	4815.5	4228.2	4186.5	4240.7	4120.5
60S ribosomal protein L11	Q9CXW4	Rpl11	20.2	5	27.5281	11	178	27.34	1271	1218.8	1300	1315.6	1332.9	1379.1	1330.6	1304.2	1475.5	1394.4	1516.2	1489	1362.2	1321.3	1309.1	1260.8
60S ribosomal protein L12	P35979	Rpl12	17.8	9	67.2727	18	165	63.66	2786.2	2927.3	2905.6	2839.7	2922.2	2836.1	2809.1	2858.2	3048.4	3141.7	3198.4	3290.3	2830.5	2910.8	2933.1	2927.4
60S ribosomal protein L13	P47963	Rpl13	24.3	8	31.2796	9	211	29.04	2596.2	2190.6	2365.6	2405	2372.3	2489.9	2485.8	2445.5	2775.8	2676.3	2968.7	2837.1	2466.7	2487.8	2443.2	2411.6
60S ribosomal protein L13a	P19253	Rpl13a	23.4	10	35.468	18	203	39.26	2484.9	2182.8	2264.2	2258.2	2261.5	2326.9	2429.5	2262.8	2636.6	2394.5	2647	2453.6	2281.8	2382.2	2302.6	2231.7
60S ribosomal protein L14	Q9CR57	Rpl14	23.5	5	23.0415	6	217	11.66	584.9	648.3	621.8	609.4	597.3	567.8	600.1	587.5	571.4	596.2	614.2	592	554.1	667.1	627.2	634.9
60S ribosomal protein L15	Q9CZM2	Rpl15	24.1	9	42.1569	11	204	35.34	1611.1	1471.4	1519.7	1511.4	1572.1	1637.9	1596.5	1547.1	1769.7	1552.8	1828.1	1689.3	1527.2	1672.6	1584.7	1707
60S ribosomal protein L17	Q9CPR4	Rpl17	21.4	10	44.0217	16	184	43.96	2480.9	2277.8	2377.6	2406.9	2322	2403.9	2427.4	2490.6	2567.6	2485.1	2771.3	2669.3	2456.9	2615.8	2440.3	2643.7
60S ribosomal protein L18	P35980	Rpl18	21.6	4	26.5957	7	188	22.3	1237.6	1022.4	1112.8	1085.8	1068.6	1127.3	1097.2	1037.3	1288.9	1074.6	1347.6	1179.3	994.4	1186.1	1122.3	1130.1
60S ribosomal protein L18a	P62717	Rpl18a	20.7	9	48.8636	16	176	42.26	2010.6	1981.7	1969.7	1984.2	1957	1944	1865.8	1931.3	2010.2	2024.6	1921.8	2011.8	1864.6	2018.1	1927.9	1791.8
60S ribosomal protein L19	P84099	Rpl19	23.5	8	33.1633	8	196	11.48	1055.2	876.8	1019.8	924.6	935	1011.6	1050.7	1065.6	1139.1	1021.4	1254.4	1101.4	1038.5	1060.4	948.4	1053.3
60S ribosomal protein L21	O09167	Rpl21	18.6	10	50.625	13	160	28.56	1761.9	1537.2	1692.8	1602	1605.4	1687	1637.1	1706.2	1849.3	1762.1	1798.7	1796.7	1716.5	1714.2	1642.9	1583.8
60S ribosomal protein L22	P67984	Rpl22	14.8	6	61.7188	21	128	66.61	2262.6	2379.6	2319.3	2349.9	2342.4	2308.5	2342.5	2334.5	2646.2	2677.1	2729.4	2800.9	2419	2335	2334.2	2433.1
60S ribosomal protein L22-like 1	Q9D7S7	Rpl22l1	14.5	4	45.9016	5	122	22.4	514.3	489.4	528.3	519.7	515.1	536.2	536.4	510.5	506.5	501.2	517.8	489.7	523.7	480.2	502.9	513
60S ribosomal protein L23	P62830	Rpl23	14.9	10	57.8571	20	140	55.8	2450.9	2383.8	2423.6	2412.4	2510.5	2505.1	2525.1	2443.6	2686.3	2673.7	2720.3	2748.1	2510.8	2499	2525.5	2441.7
60S ribosomal protein L23a	P62751	Rpl23a	17.7	10	54.4872	18	156	45.31	3998	3657.7	3835	3790.5	4003.8	4130.9	4048.8	3964.2	4538.1	4219.3	4484.8	4502.4	4130.6	3909	3855.3	3963.2
60S ribosomal protein L24	Q8BP67	Rpl24	17.8	5	28.0255	7	157	14.39	698.9	652.8	674.3	680.6	641.8	667.2	687	654.8	734.2	675.4	824.3	701.4	650.7	722.2	671.4	666.2
60S ribosomal protein L26	P61255	Rpl26	17.2	10	44.1379	11	145	20.98	1406.7	1275.2	1300.8	1309.6	1269.4	1349.7	1336.7	1304	1451.1	1411	1512.4	1407.2	1275.4	1338.7	1256	1288.3
60S ribosomal protein L27	P61358	Rpl27	15.8	9	55.1471	13	136	38.99	1658.6	1453.2	1576.3	1564.1	1542.4	1675.6	1603.9	1581.4	1810.8	1737.2	1778.5	1802.3	1602.7	1625.6	1575.8	1596.3
60S ribosomal protein L27a	P14115	Rpl27a	16.6	9	43.2432	16	148	37.78	1235.7	1082.7	1155.4	1110.8	1210.8	1181.2	1201.5	1206.3	1231.5	1257.5	1239.5	1229.7	1158.9	1166	1159.6	1157.5
60S ribosomal protein L28	P41105	Rpl28	15.7	5	32.1168	6	137	14.17	697.1	588.4	668.8	643.9	632	648.3	627.7	642.1	757.8	663.8	799.5	727.3	643.1	645.7	630	622.5
60S ribosomal protein L29	P47915	Rpl29	17.6	3	17.5	5	160	7.41	599.1	545.7	543.6	583	533.6	620.2	570.5	591.4	635.1	573.5	690.8	604.6	564.5	563.2	537.3	570.3
60S ribosomal protein L3	P27659	Rpl3	46.1	18	40.1985	29	403	86.25	3833.3	3470.2	3644	3743.2	3783.2	3884.7	4037.8	3811.8	4274.6	4023.1	4560.1	4168.3	4040.2	3748.1	3631.2	3868.1
60S ribosomal protein L30	P62889	Rpl30	12.8	10	77.3913	15	115	41.69	2272.5	2244.1	2282.7	2283.7	2265.9	2242.7	2304.4	2210.3	2610.6	2553.7	2659.5	2622.1	2355.4	2274.1	2335.6	2343.3
60S ribosomal protein L31	P62900	Rpl31	14.5	9	52.8	16	125	41.83	2039.5	1986.2	1985.2	1954	2107.2	1996	2035.4	2074.2	2222.3	2232.8	2281	2241.8	2074.3	2042.8	2032.2	2097
60S ribosomal protein L32	P62911	Rpl32	15.8	12	51.8519	16	135	41.91	2358.6	2072.4	2204.5	2189.9	2239.5	2195.6	2390.4	2204.1	2578.7	2445.2	2787.7	2509.4	2454.7	2251.5	2259.2	2324.4
60S ribosomal protein L34	Q9D1R9	Rpl34	13.3	4	28.2051	6	117	7.46	399.8	350.3	367.2	375.6	352	373.1	365.9	363.4	403.3	377.6	427.7	386.1	355.2	383.9	373.5	347.3
60S ribosomal protein L35	Q6ZWV7	Rpl35	14.5	3	21.1382	3	123	3.21	457.2	373.6	448.1	435.6	457.2	480.8	477.4	449.3	537.3	450.2	582.2	515.3	456.2	485.8	440.5	432.7
60S ribosomal protein L35a	O55142	Rpl35a	12.5	8	57.2727	15	110	31.01	2737.3	3114.1	2598	2997.2	2919.3	2572	2525.8	2625.6	2776.5	2866.4	2711.2	2776.8	2519.1	2680.6	2634	2576.5
60S ribosomal protein L36	P47964	Rpl36	12.2	3	23.8095	4	105	9.45	1102.5	961.7	1000.2	1030.4	988.2	1035.3	1093.2	1022.8	1213.4	1109.4	1262.4	1189.6	1160.4	1010.7	976.1	1064.8
60S ribosomal protein L36a	P83882	Rpl36a	12.4	3	25.4717	4	106	13.21	1153.2	923.4	1024.4	999	1035.8	1089.9	1103.2	1079.5	1183.3	1125.1	1261.2	1205.2	1108.4	1044.6	1060.6	1033.8
60S ribosomal protein L37	Q9D823	Rpl37	11.1	5	26.8041	8	97	19.9	2552.4	2219.3	2338.6	2240.8	2376	2466.2	2503.7	2465.4	2672.6	2539.4	2672.6	2691.8	2598.8	2318.7	2316.1	2315.9
60S ribosomal protein L37a	P61514	Rpl37a	10.3	5	39.1304	8	92	21.86	1084.5	1115.6	1119.4	1187.4	1122.7	1120.4	1132.4	1136.7	1322.4	1270.1	1385.1	1298.3	1173.3	1122.1	1116.3	1172.5
60S ribosomal protein L38	Q9JJI8	Rpl38	8.2	5	52.8571	11	70	35.5	3891	3984.1	3924.8	4142.8	4033.9	4216.5	4035.3	4181.5	4565.3	4622.9	4541.6	4894	4020.6	4385.4	4240.1	4279.6
60S ribosomal protein L39	P62892	Rpl39	6.4	2	23.5294	2	51	6.38	417.8	370.1	387.5	387.5	403.9	414.1	404.4	389.4	419.6	420.4	464.3	452	433.5	413	425	407
60S ribosomal protein L4	Q9D8E6	Rpl4	47.1	21	42.9594	27	419	80.35	3903.3	3251	3600.9	3716.8	3631.8	3909.5	4011	3828.3	4194.2	3750.5	4584.1	4075.4	3890.3	3866.1	3749.6	3982.8
60S ribosomal protein L5	P47962	Rpl5	34.4	17	52.862	31	297	83.08	4903.3	4600.9	4809.7	4774	4966.9	5157.7	5129.8	4921.9	5528.2	5286.7	5547.6	5625.3	5063.1	5034.4	5021.1	5007.8
60S ribosomal protein L6	P47911	Rpl6	33.5	5	20.6081	6	296	18.88	707.7	594.9	643.5	689.6	630.3	722.2	694	668.2	789.6	641.9	910.1	715	707.2	681.6	647.7	645.1
60S ribosomal protein L7	P14148	Rpl7	31.4	15	51.4815	18	270	54.45	3768.3	3416.8	3635.3	3650.2	3609.4	3801.1	3676.6	3724	4089.7	3722.9	4071.1	3831.4	3558.6	3759.9	3543.7	3596.7
60S ribosomal protein L7a	P12970	Rpl7a	30	14	46.6165	17	266	56.05	3030.4	2778.1	2943	3030	2937	3091.6	3094	3079.2	3274.8	3196.7	3379.9	3330.9	2923.3	3202.6	3117	3117.1
60S ribosomal protein L8	P62918	Rpl8	28	11	39.6887	11	257	24.69	2059.9	1870.9	1978.4	1991.2	1975.6	2100.4	2072	2064.7	2282.5	2082.5	2420.5	2189.7	2109.8	2165.7	2024.8	2056.5
60S ribosomal protein L9	P51410	Rpl9	21.9	11	65.625	16	192	51.05	3051.8	3043.3	3020.6	3110.6	3197	3137.2	3076.6	3134.8	3321.1	3390.2	3367.5	3469.5	3053.6	3115.3	3163.4	3089.8
6-phosphofructo-2-kinase/fructose-2,6-bisphosphatase 2	P70265	Pfkfb2	59.9	5	15.2216	6	519	10.4	138.8	144.5	162	138.8	155.4	136.9	141.8	137.2	146.2	134.1	143.5	147	143.9	164.2	150.7	152.5
6-phosphogluconate dehydrogenase, decarboxylating	Q9DCD0	Pgd	53.2	24	53.0021	53	483	181.32	6088.6	6154.4	6240.6	6322.8	6226.4	6020.9	6097.2	6131.5	6326.7	6461.6	6530.4	6568.9	6107.7	6186.9	6314.6	6297
6-phosphogluconolactonase	Q9CQ60	Pgls	27.2	12	70.0389	28	257	104.44	2827.2	2892.7	2812	2848	2942.4	3015.9	2916.2	2997.3	3028.1	2935.4	3024.1	3210.9	2960.8	2902.9	2985.6	3091
6-pyruvoyl tetrahydrobiopterin synthase	Q9R1Z7	Pts	16.2	4	31.25	4	144	14.37	468.4	484.6	508.8	490.9	473.6	480.3	483.8	466.6	539.5	475	512.7	500	512.1	467.5	445.9	489.1
7-dehydrocholesterol reductase	O88455	Dhcr7	53.9	4	7.85563	6	471	11.12	1274.9	1343.9	1321.1	1356.9	1319.9	1367.4	1340.5	1487.7	1520.6	1520.2	1390.2	1652.3	1283.8	1288.8	1374.6	1313.4
7-methylguanosine phosphate-specific 5'-nucleotidase	Q3UFY7	Nt5c3b	34.4	6	30.6667	11	300	26.69	693.7	691.3	686.5	712.3	704.6	717.7	711.9	688	716.7	684.6	733.6	723.7	730.9	699.1	716.2	728.4
Abl interactor 1	Q8CBW3	Abi1	52.3	18	39.0852	40	481	115.5	5647.4	5620.4	5651.1	5488.2	5662.8	5641.5	5794.2	5738.1	5828.6	5661.5	5323.6	5763.7	5612	5683.2	5579.8	5514.5
Abl interactor 2	P62484	Abi2	49.4	13	31.8386	18	446	50.8	1466.3	1471.6	1456.9	1388.5	1419	1359.7	1393.4	1426.1	1438.7	1506.8	1492.7	1547.8	1457.6	1414	1435.8	1446.4
Abscission/NoCut checkpoint regulator	Q9DAZ9	Zfyve19	43.2	6	19.2802	7	389	17.62	1202.7	1200	1228.6	1184.7	1251.8	1226.4	1196.7	1177.1	1189.2	1232.4	1209.8	1181.5	1178.5	1220.6	1221.2	1213.3
Acetoacetyl-CoA synthetase	Q9D2R0	Aacs	75.2	8	10.8631	8	672	19.7	1058.7	1154.9	1060.4	1059.7	1061.3	1058.6	1043.3	1110.9	1169.9	1248.8	1179.9	1265.9	1062.7	1045	1107.3	1106.4
Acetolactate synthase-like protein	Q8BU33	Ilvbl	68.1	4	12.0253	4	632	16.3	553.1	554.6	550.3	563.3	543.2	565.5	557.2	571.9	516	554.3	498.3	587	530.7	578.4	561.7	544.3
Acetylcholinesterase	P21836	Ache	68.1	5	12.3779	8	614	25.06	649.9	696.3	672.6	681.3	698.6	693.9	633.2	710.8	636.6	690.8	713.3	687.7	655.2	658.5	697.1	658.8
Acetyl-CoA acetyltransferase, cytosolic	Q8CAY6	Acat2	41.3	16	65.7431	45	397	168.97	4813.9	4634.5	4659.4	4703.6	4757.3	4733.8	4735.2	4608.6	5049.8	5061.9	5179.4	5191.9	4831.4	4750	4700.5	4782.3
Acetyl-CoA acetyltransferase, mitochondrial	Q8QZT1	Acat1	44.8	32	72.1698	117	424	447.94	21261.6	20667.6	21023.9	20994.9	22276.7	21993.7	21415.5	22023.9	23466.2	23823.1	23646	23712.9	21605.9	21635.2	21594.4	21501.2
Acetyl-CoA carboxylase 1	Q5SWU9	Acaca	265.1	28	14.4989	33	2345	93.84	3270.9	3396.3	3315.6	3309.1	3314.2	3200.9	3307.1	3259.5	3399	3426	3407.3	3583.5	3181.7	3278.5	3226	3304
Acetyl-coenzyme A synthetase 2-like, mitochondrial	Q99NB1	Acss1	74.6	12	25.2199	17	682	60.45	1592.8	1639	1616.6	1602.9	1680.7	1658	1647.4	1672.7	1529.8	1561	1560.8	1591	1592	1635.3	1674.7	1655.7
Acetyl-coenzyme A synthetase, cytoplasmic	Q9QXG4	Acss2	78.8	10	17.1184	13	701	34.03	1255.4	1277.3	1263	1224.7	1269.3	1250.2	1264.3	1242.6	1387.6	1359.3	1284.3	1392.2	1244.7	1237.3	1250.3	1234.9
Acid ceramidase	Q9WV54	Asah1	44.6	10	22.8426	17	394	48.65	1905.2	1913.6	1959.5	1970.3	1876.4	1840	1887.4	1855.5	1757.4	1807.5	1845	1741.2	1888.7	1820.2	1891.3	1891.3
Acidic fibroblast growth factor intracellular-binding protein	Q9JI19	Fibp	41.2	7	18.7675	7	357	13.85	845.4	891	855.2	872.6	864.8	861.6	867.3	818.8	852.8	809.5	827.8	839.8	834.1	843.5	874	853.9
Acidic leucine-rich nuclear phosphoprotein 32 family member A	O35381	Anp32a	28.5	16	54.251	34	247	103.97	5328.8	5426.8	5279	5264.9	5617.2	5696.9	5267.5	5519.6	5616.4	5646.2	5701.9	5767.1	5490.7	5264.1	5454.2	5425.8
Acidic leucine-rich nuclear phosphoprotein 32 family member B	Q9EST5	Anp32b	31.1	7	23.5294	11	272	32.98	849	900.3	915.7	910.6	875.2	900.5	847.7	895.8	933.7	899.3	934	948.5	862.4	850.6	831.3	877
Acidic leucine-rich nuclear phosphoprotein 32 family member E	P97822	Anp32e	29.6	8	32.6923	12	260	34.86	708.9	701.2	705.1	764.5	740.2	734.3	677.5	699.6	712.8	723.3	692.6	748.9	715	714.4	708.4	723.7
Aconitate hydratase, mitochondrial	Q99KI0	Aco2	85.4	58	65.2564	279	780	979.58	40142.1	39437.8	40535.4	40154	40887	40353.2	40210.6	40398.5	39313.6	38840.5	37988.2	37646.3	39737.5	39954	40362.7	39085
Actin, alpha cardiac muscle 1	P68033	Actc1	42	32	69.2308	732	377	1279.72	8638.6	9060.6	8892.3	8684	8609	8116.9	8158	8202.1	8415.6	8769.2	9323.5	8866	8785.5	8220.2	8922.5	8710
Actin, aortic smooth muscle	P62737	Acta2	42	31	69.2308	605	377	1196.58	283.9	369	397.9	355.9	351.3	282.7	245.4	286.7	265.4	320.5	479.9	340.6	318.7	266.5	356.6	344.1
Actin, cytoplasmic 1	P60710	Actb	41.7	38	75.4667	1303	375	3084.85	77944.9	77519.4	78907.6	76648.3	79888.3	80429.1	80104.2	79569.9	80386.9	78446.5	78221.1	80348.6	81204.9	78832	78895.3	77312.9
Actin-associated protein FAM107A	Q78TU8	Fam107a	17.5	2	11.1111	3	144	4.39	185.8	186.2	195.3	187.2	213.4	195.8	182	195	194.9	197.9	193.4	211.5	207.9	197.4	192.1	183.5
Actin-binding LIM protein 1	Q8K4G5	Ablim1	96.7	24	30.8943	34	861	97.42	3035.9	2886.7	2953	2984.7	2954.4	2970.2	2929.4	2974.7	2813.6	2866.7	2934.5	2709.3	2990.4	2899	2920.5	2934.4
Actin-binding LIM protein 2	Q8BL65	Ablim2	68.1	25	48.6928	33	612	107.54	5709.4	5535.7	5524.4	5602.5	5453.6	5542.6	5512	5361.8	5381.7	5504	5444.8	5436.5	5347.3	5359.3	5465.2	5478.9
Actin-binding LIM protein 3	Q69ZX8	Ablim3	77.6	3	4.69208	4	682	9.99	161	191.3	146.6	149.9	136.6	134.4	121.5	132.3	138.1	138.5	140.4	155.2	133	143.8	144.1	132.4
Actin-histidine N-methyltransferase	Q91WC0	Setd3	67.1	9	18.5185	12	594	34.1	1094.9	1086.7	1106	1147.4	1089.1	1085.3	1062.9	1115.9	1180.2	1123	1234.6	1184.9	1128.4	1076.6	1059.8	1095
Actin-like protein 6A	Q9Z2N8	Actl6a	47.4	5	12.5874	7	429	21.64	133.2	143.9	140	142.3	138.2	136.1	143.3	134.4	160.3	127.7	152.6	160.6	140.3	142.8	141.4	141.7
Actin-like protein 6B	Q99MR0	Actl6b	46.9	9	30.0469	13	426	34.21	1057.6	1122.3	1099.7	1119.4	1093.3	1092.9	1052.8	1052.2	1103.4	1080.1	1071	1113.7	1026.8	988.1	1041.4	1060.2
Actin-related protein 10	Q9QZB7	Actr10	46.2	20	61.1511	33	417	102.94	3266.7	3261.1	3280.1	3340	3369.5	3296.2	3380.2	3369	3274.8	3352.1	3339.4	3325.2	3359	3373.7	3329	3291.1
Actin-related protein 2	P61161	Actr2	44.7	22	53.5533	61	394	212.3	11752	11497.5	11479.4	11635.5	11908.5	11904.6	12475.4	11899.9	12606	12069.5	11631.2	12304.1	12288.7	12531.5	11507	10863.8
Actin-related protein 2/3 complex subunit 1A	Q9R0Q6	Arpc1a	41.6	27	66.4865	64	370	196.43	8981.5	9252.9	9048.7	8833.6	8720.9	8479.4	8948.3	8854.3	9212.3	9053.7	8339.5	9112.2	8945.2	9385.4	9035.1	8675.5
Actin-related protein 2/3 complex subunit 1B	Q9WV32	Arpc1b	41	7	23.9247	8	372	25.09	794	777.8	797.3	759.3	820	722.7	774.6	741	849.2	846.5	855	899	778.9	792	860.9	875.4
Actin-related protein 2/3 complex subunit 2	Q9CVB6	Arpc2	34.3	24	78.6667	80	300	250.52	12240	12762	12372.1	11941.5	11870	11512.7	12399.1	12157.8	12542.5	12490.4	11067.4	12481.1	12120.3	12764.1	12221.8	12043.4
Actin-related protein 2/3 complex subunit 3	Q9JM76	Arpc3	20.5	12	62.3596	34	178	94.23	5487.7	5871.2	5491.7	5357.5	5435.3	5225	5650.2	5426.9	5588	5718.4	5104.9	5630.7	5490.5	5882.4	5581.2	5401.7
Actin-related protein 2/3 complex subunit 4	P59999	Arpc4	19.7	13	66.6667	29	168	87.88	5399.6	6056.7	5609	5532.2	5587.8	5338.3	5627.6	5590.6	5577.9	5589.8	4947.8	5646.4	5509.3	5967.9	5765.5	5608.1
Actin-related protein 2/3 complex subunit 5	Q9CPW4	Arpc5	16.3	11	71.5232	29	151	100.58	5313.9	5379.4	5211.8	4879.2	5255.8	4881.1	5380.3	5181.5	5566.5	5408.4	4903.6	5694.8	5393.5	5525.3	5297.6	5284.5
Actin-related protein 2/3 complex subunit 5-like protein	Q9D898	Arpc5l	17	9	72.549	20	153	86.62	3784.3	3768.9	3639.7	3672.7	3702.6	3519	3607.2	3644	3358.9	3444	3562.5	3329.6	3663.1	3642.2	3664.9	3705.1
Actin-related protein 3	Q99JY9	Actr3	47.3	28	76.3158	91	418	300.7	12543	12690	12448.6	12142.3	12536.2	12363.2	12663.2	12445.2	12427.2	12337.1	11212.9	12362.2	12263.1	12798.1	12537.1	12004.2
Actin-related protein 3B	Q641P0	Actr3b	47.5	18	52.8708	39	418	127.87	4255.2	4255.2	4357.7	4136.5	4302.7	4329.9	4511.8	4415.4	4500.3	4441.5	3806.8	4565.3	4311.6	4518.7	4351.1	4132
Activated RNA polymerase II transcriptional coactivator p15	P11031	Sub1	14.4	9	41.7323	18	127	45.68	2576.3	2687.2	2652.2	2686	2679.2	2657.9	2688.5	2614.2	2708.9	2733.5	2887.2	2724.2	2693.6	2616.1	2593.2	2673.5
Activating signal cointegrator 1 complex subunit 2	Q91WR3	Ascc2	85.6	2	5.74099	3	749	8.82	48	45.6	54.1	46.9	55	44.1	47.8	44.9	48.4	50.9	50.8	64.7	50.8	51.5	52.2	37.8
Activator of 90 kDa heat shock protein ATPase homolog 1	Q8BK64	Ahsa1	38.1	19	58.5799	36	338	132.06	5608.4	5667.6	5519.8	5544.4	5546.6	5525	5693.8	5613.8	5793.5	5743.1	5844.8	5651.2	5740	5583.8	5536.4	5703.6
Active breakpoint cluster region-related protein	Q5SSL4	Abr	97.6	32	46.1001	59	859	191.42	9178.5	9361	9298.2	9179.8	9030.8	8925.2	9197	9124.8	9209.2	9404.1	8686.7	9321.5	9095.7	9382.2	9125	9003.4
Activity-dependent neuroprotector homeobox protein	Q9Z103	Adnp	124.2	5	4.51264	5	1108	8.73	367.9	516.2	351.8	440.3	336.5	393.8	311.2	365.2	328.3	340	360.2	295.3	298.2	304.3	364.8	332.7
Acyl carrier protein, mitochondrial	Q9CR21	Ndufab1	17.4	5	21.7949	14	156	33.79	2564.8	2583.8	2549.3	2603	2515.8	2419	2447	2483.2	2258.7	2464.8	2159.2	2237.5	2303.8	2424.9	2379.3	2435.2
Acylamino-acid-releasing enzyme	Q8R146	Apeh	81.5	17	26.0929	24	732	76.87	2948.5	3094.2	3097.1	3024.8	2953.8	2936	2943	3037.8	3060.7	3066	3147.8	3110.1	2966.5	3019.8	2943.3	3025.8
Acyl-CoA 6-desaturase	Q9Z0R9	Fads2	52.4	8	15.5405	11	444	35.94	1112.6	1094.4	1125.3	1131.4	1174.3	1121.7	1090.1	1130.7	1213.1	1174.9	1198.9	1286.3	1097.4	1069.4	1143.6	1188.7
Acyl-CoA dehydrogenase family member 10	Q8K370	Acad10	118.9	3	3.74181	3	1069	9.13	240.7	245.5	237.2	247.3	226	235.6	218.8	230.7	243.8	227.2	274.4	214.4	232.9	234	244.1	237.8
Acyl-CoA dehydrogenase family member 9, mitochondrial	Q8JZN5	Acad9	68.7	22	46.72	40	625	128.25	4344.5	4214.3	4306.5	4439.1	4445.5	4318.3	4265.2	4421.6	4737.7	4772.7	4887.5	4962.6	4235.2	4233.8	4354.7	4328
Acyl-CoA desaturase 3	Q99PL7	Scd3	41.4	2	5.01393	2	359	0	325.1	324.7	328.5	345.2	352.4	315.5	346.4	326.9	363.8	401.5	375	403	344.3	368.9	371.2	354.3
Acyl-CoA synthetase family member 2, mitochondrial	Q8VCW8	Acsf2	67.9	21	48.2927	35	615	104.61	3351.4	3443.1	3360.5	3357.5	3264.2	3213.6	3209.6	3210.8	3156.1	3332.3	3428	3289.4	3232	3161.5	3300.1	3242.4
Acyl-CoA synthetase family member 3, mitochondrial	Q3URE1	Acsf3	65	13	26.072	16	583	36.43	1061.4	1046	1095.1	1070.3	1071.4	1010.2	1049.3	1058.8	1016.1	1048.7	1000	1031.4	1017.4	1031.3	1040	1005.4
Acyl-CoA:lysophosphatidylglycerol acyltransferase 1	Q91YX5	Lpgat1	43.1	7	24.5946	12	370	31.25	1079	1155.4	1197.3	1197.1	1124	1090.8	1134.5	1140.2	1164.5	1182.1	1158.8	1161.3	1122.7	1141.3	1162.7	1135.3
Acyl-CoA-binding domain-containing protein 5	Q5XG73	Acbd5	56.6	4	9.64567	4	508	7.75	320	361.8	316.8	332.6	333.5	353.4	336	334.2	342.1	321.3	302.1	330.2	332.9	344	344.5	338.4
Acyl-CoA-binding domain-containing protein 6	Q9D061	Acbd6	30.9	9	45.0355	11	282	29.87	711.1	764.6	776.5	742.5	730.4	764.7	734.9	715.1	746.9	726	755.5	695.2	749.1	735.2	698.4	727.7
Acyl-CoA-binding protein	P31786	Dbi	10	7	63.2184	16	87	52.61	3710.3	4196.7	3896.8	4169.1	4153.4	4153.9	4211.3	4232.6	3799.7	3449.2	4013.3	3926.3	4165.8	4256.8	3951.6	4680.9
Acyl-coenzyme A thioesterase 1	O55137	Acot1	46.1	20	51.79	30	419	77.25	4047	4138.5	4097.1	4228.2	3824.5	3849.1	3757.4	3885.9	4090.3	3898.7	3912.2	4032.4	3811.4	3844.2	3919.9	3977.3
Acyl-coenzyme A thioesterase 11	Q8VHQ9	Acot11	67.3	16	30.9764	21	594	69.86	2556	2702.8	2788.6	2747	2758.9	2772.6	2738.7	2694	2798.1	2856.4	2770.2	2780.8	2704.5	2747	2759.1	2693.6
Acyl-coenzyme A thioesterase 13	Q9CQR4	Acot13	15.2	8	73.5714	14	140	44.76	2972.7	2917.1	2877.6	2852.9	2884.8	2732.3	2969.6	2813.3	2543.9	2415.7	2410.6	2326.7	2924.4	2901.5	2951.9	2866.1
Acyl-coenzyme A thioesterase 2, mitochondrial	Q9QYR9	Acot2	49.6	19	53.8631	27	453	83.95	500.9	505.5	469.9	458.6	451.4	449.1	432.2	434	421.6	403.7	414.4	390.5	412.7	410.1	442.6	442.8
Acyl-coenzyme A thioesterase 9, mitochondrial	Q9R0X4	Acot9	50.5	22	47.1526	31	439	86.85	3292	3234.9	3254.5	3219.8	3222.7	3135	3181.5	3231	3378.5	3508	3524.2	3454.1	3157.4	3210.2	3165.7	3189.8
Acyl-coenzyme A thioesterase THEM4	Q3UUI3	Them4	26	10	40	23	230	66.78	3506.9	3407.4	3520.6	3439.9	3404.5	3399.6	3449.2	3387.1	3338.5	3447.8	3378.4	3346.4	3384.1	3515.4	3383	3310.1
Acylglycerol kinase, mitochondrial	Q9ESW4	Agk	46.9	20	56.5321	39	421	137.24	6343.3	6233.1	6133	6160.4	6219.6	5937.2	6209.1	6122.9	6720.1	6934	6584.9	6986.8	5979.9	6090.1	6130.8	5900
Acylphosphatase-1	P56376	Acyp1	11.2	6	57.5758	9	99	28.23	1736.2	1743.3	1682.8	1703.5	1743.4	1735.2	1723.8	1758.5	1703.9	1683.8	1683.6	1620.8	1768	1766.7	1742	1882
Acylphosphatase-2	P56375	Acyp2	11.9	6	47.1698	8	106	23.05	1372	1558.8	1344.2	1456	1466.8	1441.5	1497.6	1503.6	1406.3	1293.8	1458.2	1356.8	1376.3	1473.1	1413.8	1481.6
Acyl-protein thioesterase 1	P97823	Lypla1	24.7	6	34.3478	10	230	39.86	1339.5	1356.7	1322.9	1339.5	1344.3	1304.6	1298.9	1343.9	1258.1	1298.4	1335	1211.4	1343.9	1310.2	1370.6	1395
Acyl-protein thioesterase 2	Q9WTL7	Lypla2	24.8	12	62.3377	25	231	69.74	2067.7	2029.3	2102.4	2108.5	2131.9	2145.5	2102.6	2111.4	2074.3	2047	2056.7	2028.6	2151.1	2123.8	2113.9	2052.2
Acylpyruvase FAHD1, mitochondrial	Q8R0F8	Fahd1	25.2	10	51.5419	17	227	58.08	3284.5	3372.8	3361.8	3410.6	3356.8	3415.9	3291.7	3386	3011.8	3061.9	3071.6	2906.9	3281.8	3338	3276.5	3369.7
Adapter molecule crk	Q64010	Crk	33.8	18	65.4605	36	304	103.39	3846.4	3928	3810.5	3781.2	3950.7	4010.4	4016.9	4051.1	3687.6	3644.1	3710.1	3795.1	3928.3	3919.1	3830.7	3948.9
Adaptin ear-binding coat-associated protein 1	Q9CR95	Necap1	29.6	15	57.8182	29	275	93.93	6066.5	6041.3	5805.6	5806.5	5818.3	5740.9	5799.5	5721.9	5578.1	5445.1	5852.6	5195.6	5897.3	5869	5724.6	5811.4
Adaptin ear-binding coat-associated protein 2	Q9D1J1	Necap2	28.6	4	23.6842	4	266	13.75	363.6	378.5	370.6	368	369.8	369.7	349.5	366.9	355.7	386	368.3	401.3	344.5	365.1	369.8	370.7
Adenine phosphoribosyltransferase	P08030	Aprt	19.7	8	60.5556	12	180	33.4	1224.4	1201.6	1220.7	1198.2	1257.3	1181.4	1189.8	1237.5	1261	1231.5	1236.1	1229.8	1249.1	1186.1	1221.7	1233.3
Adenomatous polyposis coli protein	Q61315	Apc	310.9	13	6.67838	13	2845	25.39	1140.3	1109.7	1185.5	1159.9	1184.3	1184.3	1152	1200.4	1235.6	1248.7	1241.5	1288.1	1163.8	1134.7	1126.7	1116.8
Adenomatous polyposis coli protein 2	Q9Z1K7	Apc2	243	2	0.835532	6	2274	8.6	117.5	117.1	133.1	128.9	124	144.3	135.3	127.7	130.6	124.5	133.4	145.3	133.8	121.9	121.2	133.6
Adenosine kinase	P55264	Adk	40.1	17	50.9695	32	361	82.81	4515.1	4494.1	4349.4	4309.3	4314.7	4275.7	4280.7	4319.7	4356.3	4447.6	4667.5	4519.2	4282.6	4225.5	4298.5	4466.3
Adenosylhomocysteinase	P50247	Ahcy	47.7	25	63.6574	40	432	107.79	4762.9	4813.9	4816.1	4859.6	4706.5	4533.1	4615.2	4515.1	4759.5	4641	4687	4489.7	4736.4	4564.3	4731	4709.1
Adenylate cyclase type 1	O88444	Adcy1	123.3	8	9.21288	8	1118	21.95	725.5	701.8	703.3	685.2	741.3	734	769.1	701	743.1	727.2	762.1	718	689.8	679.9	731.9	687.1
Adenylate cyclase type 2	Q80TL1	Adcy2	123.2	6	7.24771	7	1090	16.72	173.5	175.4	175.5	169.1	180.6	174.5	165.1	180.6	176.3	195.3	217.2	198.3	206.3	159.8	188.6	184.4
Adenylate cyclase type 3	Q8VHH7	Adcy3	129	3	3.05677	3	1145	7.42	46	54.2	56.6	43.7	51.2	50.6	44.9	51	56.5	52.1	50.2	53.7	51.8	50.1	37.8	50.6
Adenylate cyclase type 5	P84309	Adcy5	139	8	8.16165	8	1262	28.03	709.8	728.7	717.6	674.1	687.6	681.6	679.9	696.5	665.7	657.9	710.9	688.6	663.5	638.8	644.3	625.6
Adenylate cyclase type 8	P97490	Adcy8	140	5	5.36429	5	1249	10.61	818.7	797.2	795.9	788.5	782.3	841.9	821.8	827.8	724.3	771.8	801.2	755.7	810.6	803.5	816.4	814.4
Adenylate cyclase type 9	P51830	Adcy9	150.9	28	27.5684	37	1353	117.55	3917.8	3943.9	3947.1	3859.9	4023.1	4020	4159.1	4117	3757.7	3835.2	3433.1	3796.6	3895.1	4115.5	3928.2	3972
Adenylate kinase 2, mitochondrial	Q9WTP6	Ak2	26.5	11	63.5983	20	239	63.08	2282.3	2334.4	2230.1	2331.5	2473.4	2529.4	2415.6	2376.9	2540.7	2479.6	2608.1	2596.3	2412	2416	2379.4	2328.3
Adenylate kinase 4, mitochondrial	Q9WUR9	Ak4	25	14	72.1973	31	223	102.32	5160	4850.8	4910.5	4812.6	4849.9	4760.8	4713.2	4844	4632.1	4410.1	4447.3	4154.4	4606.1	4602.5	4632	4668.7
Adenylate kinase isoenzyme 1	Q9R0Y5	Ak1	21.5	22	88.1443	67	194	198.82	8478.4	8056.1	8038.9	8317.3	8259.9	8097.5	8127.2	7932.3	8194.8	8166.8	8975.3	8005.7	8347.9	7975.1	7985	8471.9
Adenylate kinase isoenzyme 5	Q920P5	Ak5	63.3	31	65.1246	59	562	188.05	9798.9	9489.4	9375	9316.9	9452.8	9496.9	9450.7	9366.8	9851.2	9415.9	9032.6	9598.9	9441.6	9470.4	9446.8	9524.9
Adenylosuccinate lyase	P54822	Adsl	54.8	15	45.0413	17	484	56.35	1714.9	1632.2	1659.3	1722.6	1728.1	1631.2	1689.2	1653.9	1752.3	1729	1762.5	1721	1735.3	1675.6	1676.7	1689.3
Adenylosuccinate synthetase isozyme 1	P28650	Adssl1	50.2	15	48.14	22	457	74.67	1884.7	1931.9	1942.2	2016.9	1779.4	1820.9	1848.1	1841	1614.4	1599.6	1642.4	1540.5	1844.9	1798.7	1836.7	1888.2
Adenylosuccinate synthetase isozyme 2	P46664	Adss	50	24	55.2632	40	456	111.32	3698.4	3706.4	3671.3	3637.6	3675	3604.2	3776.3	3651.8	3724.8	3595.8	3592.4	3677	3674.1	3692.7	3668.4	3643.1
Adenylyl cyclase-associated protein 1	P40124	Cap1	51.5	29	65.1899	98	474	311.05	15337.4	15829.1	15508.2	15178.5	15815.6	15903.3	16178.6	16107	15769.8	15546.9	15056.7	15540.2	16274.4	16607.4	16188.2	15888.3
Adenylyl cyclase-associated protein 2	Q9CYT6	Cap2	52.8	27	61.7647	62	476	189.61	7698.8	7855.6	7714.1	7574.6	7520.7	7404.7	7693.3	7539.4	7611.2	7492.4	7275.8	7374.8	7643.1	7725.6	7720	7321.2
Adenylyltransferase and sulfurtransferase MOCS3	A2BDX3	Mocs3	49.3	3	6.95652	4	460	10.69	443.6	448.1	464.4	446.4	482.4	496.2	469.1	478.2	478.6	472.7	446.4	483.9	472.5	462.5	445.7	473.8
Adhesion G protein-coupled receptor B1	Q3UHD1	Adgrb1	173.2	11	9.1024	12	1582	32.56	749.9	768.2	831.2	781.9	794	776	800.2	802.9	817.2	816	783.8	822.8	760.7	738.7	775	789
Adhesion G protein-coupled receptor B2	Q8CGM1	Adgrb2	169.8	6	5.25304	6	1561	8.09	184.8	183.6	192	189.1	169.8	173.5	175.5	177.3	187.4	174.1	178.1	173.9	183.6	176.6	183.4	178.4
Adhesion G protein-coupled receptor B3	Q80ZF8	Adgrb3	171.2	10	8.7385	11	1522	28.57	654.6	627.8	664.1	651	657.7	670.2	675.8	635.8	679.6	673	647.9	648.2	660.9	641.4	649.5	621.8
Adhesion G protein-coupled receptor L1	Q80TR1	Adgrl1	161.6	25	28.3765	34	1466	108.89	3205.5	3298.8	3216.4	3150.6	3256.6	3152.5	3185.2	3221.4	3208.7	3352.1	3175.8	3401.5	3139.8	3204.5	3167	3185
Adhesion G protein-coupled receptor L2	Q8JZZ7	Adgrl2	166.5	5	4.50572	5	1487	12.07	342.3	284.4	312.5	282.3	290	299.1	302.3	287.3	279.5	281.6	324.4	286.4	286	323.8	268.3	284.3
Adhesion G protein-coupled receptor L3	Q80TS3	Adgrl3	171	25	20.8848	32	1537	71.99	2635.7	2612.9	2644.5	2515.1	2651.2	2566	2600.1	2546.2	2529.9	2622.4	2845.8	2586.9	2545	2471.9	2484.8	2489.3
Adipocyte plasma membrane-associated protein	Q9D7N9	Apmap	46.4	13	37.8313	23	415	62.16	1908.8	1904.2	1908.1	1961	1914.8	1959.8	1875.3	1899.4	1888.1	1873.7	1787.6	1897.6	1843.6	1913.3	1910.6	1855.9
ADP/ATP translocase 1	P48962	Slc25a4	32.9	34	76.8456	194	298	527.97	30290.2	31352.2	30139.8	31040.5	30189.4	29431.1	30591	30218.8	30435.9	31620.8	30319.9	29652.4	30601.5	31619.5	30853.1	30069.5
ADP/ATP translocase 2	P51881	Slc25a5	32.9	31	72.1477	183	298	500.99	11630.1	11930.7	11784.9	11863.5	11730.3	11593.8	11835.2	11668.8	11609.8	11665.3	11019.9	11256.1	11582.8	12001.4	11824.4	11254.2
ADP/ATP translocase 4	Q3V132	Slc25a31	35.2	6	12.1875	24	320	65.61	258.9	262.4	264.7	248.6	229.6	237	238.7	243.6	229.4	229.8	214.2	232.2	215.9	226.3	210.7	249.2
ADP-dependent glucokinase	Q8VDL4	Adpgk	53.9	5	17.1371	6	496	18.3	318.8	317.2	311.1	302.9	320	292.7	325.8	318.6	328.8	319.3	303.7	323	305.3	300.5	312.4	301.7
ADP-ribose glycohydrolase ARH3	Q8CG72	Adprhl2	39.4	6	20.5405	9	370	23.58	1037.6	1025.6	1032.4	1044.9	974.7	1021.9	1003.4	1005.3	988.1	969.9	999.2	957.3	1017.7	987.6	1010.3	1025.5
ADP-ribose glycohydrolase MACROD1	Q922B1	Macrod1	35.3	7	30.6502	9	323	35.82	1617	1600.1	1664.3	1666.4	1605.6	1649.6	1549.2	1580.4	1351	1292.3	1248	1231.5	1522.5	1523.5	1579.7	1584.7
ADP-ribose glycohydrolase MACROD2	Q3UYG8	Macrod2	52.1	5	18.7368	6	475	10.58	256.6	224.6	253.3	261.8	242.1	264	267.5	231.7	259.6	263	273	261.6	266.6	240.5	253.3	263.8
ADP-ribose pyrophosphatase, mitochondrial	Q8BVU5	Nudt9	38.6	10	28	13	350	29.81	1822.5	1802.9	1824.1	1820.4	1823.6	1853.1	1810.1	1866.2	1807	1844.6	1843	1918.7	1792.2	1836.3	1825.2	1871.4
ADP-ribosyl cyclase/cyclic ADP-ribose hydrolase 1	P56528	Cd38	34.4	3	11.5132	3	304	9.7	222.3	222.5	227.4	253.6	274.5	292.1	279.9	295.8	263.5	225.6	229.2	265	242.6	256.6	213.8	221.9
ADP-ribosylation factor 1	P84078	Arf1	20.7	18	85.6354	94	181	297.7	14.7	20.5	15.6	13.6	13.9	18.4	14.1	18.1	12.2	13.1	11	14.1	11.1	15.7	17.5	13.7
ADP-ribosylation factor 2	Q8BSL7	Arf2	20.7	14	65.1934	61	181	213.48	117.4	114.6	122.2	129.6	103.4	105.1	109.6	98.8	119.4	116.1	136.9	123.1	113.2	103.1	106	120.5
ADP-ribosylation factor 3	P61205	Arf3	20.6	18	85.6354	93	181	292.35	10853.1	10926.9	11271.7	11181.1	10747.6	9870.2	10676.5	10508.2	11185.9	11471.4	11135.4	11137.8	11190.8	11340.9	11060.6	11355.5
ADP-ribosylation factor 4	P61750	Arf4	20.4	11	76.6667	39	180	133.92	497.5	499.4	512.6	529.4	502.4	484.5	523.2	508.7	566.8	556.8	557.9	572	515	513.7	492.7	534.7
ADP-ribosylation factor 5	P84084	Arf5	20.5	14	86.6667	58	180	184.05	2387.5	2293	2336.1	2342.8	2371.5	2262.4	2464	2377.6	2650.4	2681.9	2665.4	2736.7	2530.9	2455.5	2448.3	2418.4
ADP-ribosylation factor 6	P62331	Arf6	20.1	9	66.8571	19	175	41.38	1067.5	1071.8	1135.9	1137.8	1060	1044.2	1061.6	1034.4	1044.3	1060.8	1103.7	979.8	1125.6	1092	1083.2	1110.6
ADP-ribosylation factor GTPase-activating protein 1	Q9EPJ9	Arfgap1	45.3	21	52.657	46	414	174.68	6617.2	6246	6260.4	6289.7	6548.5	6530.4	6548.1	6543.6	6154.8	6361.5	6521.9	6186.1	6325.6	6316.1	6365.6	6159.4
ADP-ribosylation factor GTPase-activating protein 2	Q99K28	Arfgap2	56.6	14	32.6923	16	520	48.81	2360.8	2428.3	2359.6	2304.8	2406.7	2472.8	2432.5	2432.6	2495.9	2443	2483.3	2528	2389.3	2424.2	2446.2	2457.8
ADP-ribosylation factor GTPase-activating protein 3	Q9D8S3	Arfgap3	57.4	6	15.6788	6	523	16.58	425.7	425.1	422.9	401.3	423.5	415.4	407.8	419	416.6	372.1	395.8	433.5	413.3	441.2	439.7	461.6
ADP-ribosylation factor-binding protein GGA1	Q8R0H9	Gga1	69.9	16	37.1654	29	635	90.04	2450.8	2418.2	2440.8	2429.2	2434	2514.5	2493.4	2519.6	2458.3	2494.3	2536	2542.7	2505.7	2429.9	2466.5	2464.1
ADP-ribosylation factor-binding protein GGA2	Q6P5E6	Gga2	66	4	13.5987	6	603	18.73	167.6	148.8	170.9	166.6	167.9	151.7	154.9	169.4	151.7	137.5	169.3	175.6	158.1	156.2	145.7	154.8
ADP-ribosylation factor-binding protein GGA3	Q8BMI3	Gga3	77.9	15	28.4123	30	718	80.32	1495	1532.7	1492.8	1498	1545.9	1596.3	1572	1607.4	1483.9	1523.8	1523.6	1453.9	1548.6	1535.5	1553.5	1534.7
ADP-ribosylation factor-like protein 1	P61211	Arl1	20.4	2	12.1547	4	181	8.2	266.8	300.8	278.5	289.4	267.8	283.6	285.2	280.9	299	274.2	281.6	294.6	267.9	286.8	293.1	296.4
ADP-ribosylation factor-like protein 15	Q8BGR6	Arl15	22.9	3	22.0588	6	204	25.77	867.7	837.8	817.6	795.3	847.5	791.2	860.1	797.6	805.4	822.8	769	826.4	825.8	900.9	861.7	793.1
ADP-ribosylation factor-like protein 2	Q9D0J4	Arl2	20.9	8	69.0217	9	184	36.06	721.8	760.6	725.1	726	691.7	669.9	692.3	729.1	741.8	719.6	751	732.5	713.4	695.9	721.9	760.2
ADP-ribosylation factor-like protein 3	Q9WUL7	Arl3	20.5	10	67.5824	22	182	82	2971.6	3027.4	3016.2	3049.6	2937	2880.1	2998.5	2944.9	3092.2	3052.8	3093.4	3095.2	3016.5	2946.3	2974.6	3109.9
ADP-ribosylation factor-like protein 6	O88848	Arl6	20.9	9	58.6022	13	186	46.36	1485.4	1504.7	1506.3	1568.1	1482.2	1442.5	1433.3	1483.5	1538.7	1546.3	1588.6	1474	1475.7	1436	1482.3	1523.1
ADP-ribosylation factor-like protein 6-interacting protein 1	Q9JKW0	Arl6ip1	23.4	3	11.8227	5	203	15.45	480.4	467.7	480.5	493.5	485.5	461	448.1	454.9	473.4	473.3	471.7	471.4	444.8	446.8	437.2	451.8
ADP-ribosylation factor-like protein 8A	Q8VEH3	Arl8a	21.4	13	72.5806	40	186	153.65	7063.4	6670.1	6648.7	6602.5	6466.4	6498.3	6770.5	6791.2	7016.7	7076.9	7297.4	7004.4	6859.9	6997.7	7012.1	7106.7
ADP-ribosylation factor-like protein 8B	Q9CQW2	Arl8b	21.5	12	69.8925	34	186	132.96	2525	2442.7	2481.5	2496.8	2457.8	2416.7	2614.9	2546.5	2846.9	2517.6	2963.2	2538.2	2667	2581.3	2443.2	2637.2
ADP-sugar pyrophosphatase	Q9JKX6	Nudt5	24	6	31.1927	8	218	26.68	793	781.9	860.7	814.6	867.3	873.7	821.6	875.3	813	800.5	773	841.5	841.4	844.5	861.2	857.4
Afadin	Q9QZQ1	Afdn	206.4	42	28.9011	58	1820	181.33	7340.7	7384.2	7306.4	7310.9	7483.8	7520	7323.6	7336.8	7293.7	7294.3	7524.4	7495.5	7374.2	7386.8	7293.1	7393.2
AFG1-like ATPase	Q3V384	Afg1l	54.3	4	10.2083	4	480	7.89	241	236.6	329.1	291.2	312.2	305.3	292.8	308.9	270.6	311.5	299	292.3	296.2	301.8	297.8	308.8
AFG3-like protein 2	Q8JZQ2	Afg3l2	89.5	40	50.8728	61	802	190.46	10207.6	10193.4	10285.2	10161.3	10241.5	10152.7	10026.7	10216.3	9766.1	9900	9743.9	9711.2	9877.8	10033	10116.8	9860.4
Aflatoxin B1 aldehyde reductase member 2	Q8CG76	Akr7a2	40.6	13	41.4169	26	367	78.59	3054.9	2946.5	3014.7	3009.5	2987.1	2930.5	2981.7	2870	2931.3	2983.4	3038.1	2887.9	3017.9	2974.7	2972.4	3052.8
Aftiphilin	Q80WT5	Aftph	101.1	3	6.22986	5	931	9.1	136.8	122.9	135.5	132.8	129.5	130.1	115.7	119.2	112.2	123.6	114.1	119.5	128.1	124.3	124.3	140.3
Aggrecan core protein	Q61282	Acan	221.8	16	9.99062	21	2132	51.08	1532.3	1620.5	1610.1	1574.5	1533.8	1563	1557.6	1573.7	1430.2	1410.4	1372.6	1449.6	1548.6	1534.3	1491.8	1457.6
Agrin	A2ASQ1	Agrn	207.4	22	15.641	27	1950	90.39	2980.1	2936.4	2888.5	2796.4	2874.9	2897.4	2756.5	2890	2757.9	2809.3	2879.9	2864.5	2747.8	2742.1	2840	2781.7
AH receptor-interacting protein	O08915	Aip	37.6	12	48.1818	19	330	65.13	2527.8	2495.9	2626	2544	2625.4	2456.1	2518.9	2479.4	2543.9	2459.3	2644.4	2561.1	2474.7	2525.5	2452.5	2695.7
A-kinase anchor protein 1, mitochondrial	O08715	Akap1	92.1	2	2.80047	2	857	3.28	138.4	139.5	141.6	132.1	133.7	129.5	132.2	129.1	126.2	127.6	131.7	142.3	121.2	137.9	137	116.8
A-kinase anchor protein 10, mitochondrial	O88845	Akap10	73.6	6	10.574	11	662	25.81	994.2	959.9	938.8	878.9	990.1	907.5	972.2	886.2	859.3	994.3	869	945.9	940	955.6	1007.3	984.6
A-kinase anchor protein 12	Q9WTQ5	Akap12	180.6	25	18.2304	31	1684	101.82	3618.5	3768.1	3672.6	3854.5	3752.3	3739.1	3611.3	3648.3	3731.7	3986.5	4226.3	4051.3	3732.3	3489.2	3788.7	3877.1
A-kinase anchor protein 2	O54931	Akap2	98.5	14	19.7088	14	893	42.6	1915.4	1957.3	1919	1949.6	1987.5	1986.6	1901.1	2055.3	2013.2	1949	2114.2	2004.3	1943.2	1921.8	1998	2023.9
A-kinase anchor protein 5	D3YVF0	Akap5	79.4	34	70.604	56	745	213.74	7761.8	7847	7718.4	7984.4	7785.8	8012.7	7813.1	7891.7	7307	7932.8	8294.5	7741.4	7529.2	7535.4	7546.2	7359.6
A-kinase anchor protein 7 isoform gamma	Q7TN79	Akap7	35.5	3	9.87261	4	314	12.12	911.9	925.2	919.8	970.7	914.2	893.5	875.9	900.7	985.1	1062.1	1126.3	1043.1	910.4	835.9	900.2	865.9
A-kinase anchor protein 8	Q9DBR0	Akap8	76.2	2	6.40466	2	687	3.49	17.2	12.4	14.3	8.1	9.4	12.7	13	11.6	15.7	15.7	16.4	17.5	17.9	15.2	13.5	16.9
A-kinase anchor protein 8-like	Q9R0L7	Akap8l	71.4	2	4.20561	2	642	6.27	32.1	32.6	34	33.9	30.3	30.8	31	28.6	30.4	35.7	31.8	40.1	31.8	33.9	26.5	37.3
A-kinase anchor protein 9	Q70FJ1	Akap9	435.9	3	1.00079	3	3797	8.45	306.1	298.3	298.9	309.2	292.7	305.3	306.4	289.6	284.3	285.3	297.4	289.5	311.4	291.7	275.2	303.9
A-kinase anchor protein SPHKAP	Q6NSW3	Sphkap	185	19	14.5821	22	1687	59.25	1969.5	2021.3	2028.9	1922.2	2074.6	2126.3	2139.1	2060.4	2041.7	2061.8	2156.9	2230.4	2036	2095.2	2131.4	2089
AKT-interacting protein	Q64362	Aktip	32.9	6	21.9178	6	292	19.58	380.7	407.3	374.3	402.3	411.2	413.9	378	373.4	392.7	380.8	395.1	402.5	374.2	350.8	398.4	385.9
Alanine aminotransferase 1	Q8QZR5	Gpt	55.1	8	25.8065	10	496	24.08	550.6	555	579.2	600.2	569.2	548.7	556.3	567.3	521.3	535.8	520.5	537.7	548.8	552.4	550.2	567.3
Alanine aminotransferase 2	Q8BGT5	Gpt2	57.9	4	12.4521	5	522	11.25	341.2	369.8	348.7	340.9	348.9	366.2	357.4	354.5	347.1	357.6	354.6	345.5	351	348.2	335.5	319.7
Alanine--tRNA ligase, cytoplasmic	Q8BGQ7	Aars	106.8	44	55.6818	105	968	329.2	12471.6	12265.3	12382.6	12616.1	12733.9	12623.3	12790.3	12402	12869.8	13034.3	12928.7	13381.1	12583.3	12615.3	12791.8	12640.7
Alanine--tRNA ligase, mitochondrial	Q14CH7	Aars2	106.7	4	4.79592	5	980	12.62	196	205.9	204.7	204.9	195.4	204.3	206.5	185.1	204.3	210.1	201.4	225.4	204.2	189.1	201.2	204.2
Alanyl-tRNA editing protein Aarsd1	Q3THG9	Aarsd1	44.9	11	31.3107	13	412	36.14	1089	1126.3	1124	1117.7	1106.5	1119.8	1059.6	1095.5	1106.5	1102.8	1108.1	1108.5	1086.2	1110.9	1061.6	1089.6
Alcohol dehydrogenase class-3	P28474	Adh5	39.5	19	47.3262	39	374	128.57	7025.5	7050	7028.6	7111.3	7048.2	7044.5	6938.2	7069	6921.9	6754.4	6681.4	7030.3	7005.4	7013.6	7254.1	7418.3
Aldehyde dehydrogenase family 3 member A2	P47740	Aldh3a2	53.9	14	34.5041	17	484	55.1	2456.6	2434.6	2469.5	2482.4	2404.2	2372.1	2370.4	2441.9	2405.7	2388.2	2523.6	2435.5	2366.1	2376	2335.7	2246.6
Aldehyde dehydrogenase family 3 member B1	Q80VQ0	Aldh3b1	52.3	6	14.1026	7	468	24.51	1064.5	1041.6	1131.6	1161.7	1045.6	1065.6	1074.1	1056.3	892.4	887.1	914.8	873.7	1042.2	1044.3	1071.5	1126.4
Aldehyde dehydrogenase X, mitochondrial	Q9CZS1	Aldh1b1	57.5	31	65.896	57	519	181.62	6259.6	6228.1	6129.8	6114.1	6319.1	6147.6	6338.3	6250	7758.9	7153.9	6725	7582	6209.3	6151.4	6165	6070.9
Aldehyde dehydrogenase, mitochondrial	P47738	Aldh2	56.5	32	77.264	75	519	251.04	9871.6	10423.6	9856.2	10243.6	9617.1	9150.8	8891.5	9092.6	9240.6	8812.2	9301.6	8591.6	9016.2	9113.7	10365.4	10289.9
Aldo-keto reductase family 1 member A1	Q9JII6	Akr1a1	36.6	23	72.3077	55	325	161.05	7135.3	7013.9	7158	7062.4	7110.9	6854.8	6837.5	7028.2	6954.1	6785.6	6801.5	6768.8	6960.5	6947.6	6987.3	7495.8
Aldo-keto reductase family 1 member B1	P45376	Akr1b1	35.7	16	56.3291	36	316	125.26	7387.6	7409.6	7248.7	7283.5	6988	6822.2	6887	6927.8	6552	6838.1	7235.6	6430.9	7352.8	7019	7106	7362.1
Aldo-keto reductase family 1 member B7	P21300	Akr1b7	36	3	7.59494	6	316	8.02	130.2	138.3	125.5	125.5	122.1	112	115.3	108.6	115.4	115.2	111.6	106.6	128.8	123.8	109.8	126.6
Aldose 1-epimerase	Q8K157	Galm	37.8	3	16.6667	3	342	8.82	187.5	221.5	216.6	199.8	183.8	193.4	173.2	185.1	197	179.7	182.1	183.6	182.8	198.1	198.6	211.9
Aldose reductase-related protein 2	P45377	Akr1b8	36.1	5	17.4051	10	316	23.13	852.6	865.3	890.7	834.3	820.9	821.6	875.7	814.7	799	783.7	801.6	784.1	808.3	850.5	810	842.7
Alkyldihydroxyacetonephosphate synthase, peroxisomal	Q8C0I1	Agps	71.6	4	10.0775	4	645	13.68	346.1	340.9	340	346	359.9	371.9	370.1	349.9	344.1	347	354.4	379.8	365.5	343.6	366.8	357.6
Alpha- and gamma-adaptin-binding protein p34	Q8R2R3	Aagab	34.5	2	9.81013	2	316	9.57	51.2	48.9	62.6	52.3	52.1	48.6	50.1	50.7	49.1	49.4	46.8	56	46.7	52.4	49.1	45.3
Alpha/beta hydrolase domain-containing protein 17A	Q99JW1	Abhd17a	33.9	3	20.6452	3	310	13.43	74.3	71.1	69	69.5	74.9	72.8	72.7	61.9	74.2	71.9	85.5	69.8	70	63.2	70.2	73.8
Alpha/beta hydrolase domain-containing protein 17B	Q7M759	Abhd17b	32.2	6	43.75	8	288	34.27	264.2	251.5	248.2	241.3	259.9	244.8	251.8	252.7	264	272	257.9	269	244.7	245.9	245.4	234.9
Alpha/beta hydrolase domain-containing protein 17C	Q8VCV1	Abhd17c	35.1	4	19.6875	5	320	16.92	299	312.1	317.2	296.3	297.6	297.4	295.1	305.1	299	285.4	287.3	286.8	289.6	295.8	268.2	291.2
Alpha-1,3/1,6-mannosyltransferase ALG2	Q9DBE8	Alg2	47.4	16	50.8434	33	415	100.33	3373	3264	3396	3412.9	3383.9	3479.1	3401.3	3396	3435.3	3429.8	3367.9	3504.6	3401	3374.2	3342.4	3299.4
Alpha-1-antitrypsin 1-1	P07758	Serpina1a	46	16	47.6998	33	413	107.25	5908.6	7285.5	6075.1	6326.2	6240	5331.8	5170.8	5434	6659.4	5503.6	6655.3	5573.6	6405.6	5633.2	6094.7	7098.6
Alpha-1-antitrypsin 1-2	P22599	Serpina1b	45.9	15	46.9734	29	413	87.73	957.6	1120.8	1032.9	1015.8	998	849.4	837.9	894.6	1064.8	895.9	1023.8	908.4	1007.1	923.9	967.4	1148.3
Alpha-1-antitrypsin 1-4	Q00897	Serpina1d	46	12	32.4455	24	413	76.44	330	360.3	377.4	355.7	369.8	350.7	338.8	332.3	367.8	296.8	364	349.3	401	378.4	386.4	415
Alpha-1-syntrophin	Q61234	Snta1	53.6	15	40.7555	27	503	60.13	2978.2	2874	2976.6	2699.2	2947	2785	2846.5	2779.5	2620	2797.3	2657.2	2685.9	2761	3267.1	2939.5	2821
Alpha-2-antiplasmin	Q61247	Serpinf2	54.9	2	3.66599	3	491	4.75	311.9	337.3	329.2	314.7	324	279.1	286.8	286	347	287	326.1	318.1	301.8	288.3	275.2	302.1
Alpha-2-HS-glycoprotein	P29699	Ahsg	37.3	10	42.8986	15	345	32.61	1349.7	1491.8	1383.8	1404.2	1451.3	1354.1	1318.6	1332	1893.5	1601.2	2005.3	2021.9	1476.3	1404.2	1394.4	1517.2
Alpha-2-macroglobulin receptor-associated protein	P55302	Lrpap1	42.2	19	46.1111	27	360	83.99	3177	3318.5	3216.3	3368.9	3201.2	3237.7	3060.5	3179.9	3325.3	3186.3	3265.7	3397.8	3024	3022.4	3093.8	3111.3
Alpha-actinin-1	Q7TPR4	Actn1	103	61	71.3004	147	892	439.99	12978.1	13694.4	13463.4	13405	13397.1	12905.1	13032.6	13248.3	12560.4	12723.7	12549.1	12514.3	12766.5	13115.3	12977.9	12933.6
Alpha-actinin-2	Q9JI91	Actn2	103.8	41	52.349	61	894	208	4441.5	4192.7	4394.3	4321.9	4160.4	4036.4	4098.7	4176	4218.7	4166.9	4098	4066.9	4031.4	4093.1	3905.5	3972
Alpha-actinin-4	P57780	Actn4	104.9	63	74.0132	131	912	437.06	20477.4	21879.6	20336.2	20531.2	20531.9	20037.8	19842.9	20281.6	20110.4	20151	20747.3	20378.5	20216.3	20361.4	20894.9	20793.7
Alpha-adducin	Q9QYC0	Add1	80.6	36	58.9116	87	735	296.27	10827.6	10571.5	10562.1	10399.6	10608.4	10848.5	10822.8	10792.6	10570.2	10640.1	10426.3	10489	10924.8	10845.6	10828.7	10584.8
Alpha-aminoadipic semialdehyde dehydrogenase	Q9DBF1	Aldh7a1	58.8	20	48.0519	38	539	142.71	6288.7	6449.4	6233.9	6386.8	5866.9	5578	5602.3	5707.9	5832.8	6081.3	6409.4	5680.8	5574.4	5577	5924.8	5848.8
Alpha-aminoadipic semialdehyde synthase, mitochondrial	Q99K67	Aass	102.9	4	9.28726	4	926	16.52	44.3	44.3	44.4	51.2	52.5	44.7	42.9	44.5	45.1	44.3	44.8	43.6	46.3	51.3	43.7	48.7
Alpha-centractin	P61164	Actr1a	42.6	21	67.0213	40	376	126.94	6804.1	6722.9	6723	6828.8	6892.8	6907.6	6869.1	6902.3	6738	6844.2	6801.8	6846.3	6897.1	6909.9	6948.3	6856.2
Alpha-crystallin B chain	P23927	Cryab	20.1	11	62.2857	16	175	40.42	1935.3	1963.2	2050.1	2162.6	1741.6	1872.4	1966.5	1906.5	1343.5	1270	1215	1090.1	1888.1	1984	1898	2109.7
Alpha-endosulfine	P60840	Ensa	13.3	14	78.5124	31	121	110.08	6994.1	6702.6	6749.2	6659.1	6995.1	7177.1	7038.2	6947.4	6626	6851.2	6924.3	6865.5	7241	7079.2	6961.7	7134.2
Alpha-enolase	P17182	Eno1	47.1	44	88.2488	675	434	1861.46	55455.1	53262.8	56192.5	54914.7	55483	55689.1	55215.7	55628	53803.5	52224.8	53081.6	51223.2	55865.7	54661.1	55348.3	56346.6
Alpha-globin transcription factor CP2	Q9ERA0	Tfcp2	57	2	8.36653	2	502	3.45	132.5	135.6	121.8	131.5	136.1	129.4	134.1	129.9	122.6	133.5	150.9	129.1	130.4	135.5	120.5	119.2
Alpha-internexin	P46660	Ina	55.3	42	73.0539	147	501	528.65	23189.4	23410.5	23593.8	23856.3	22034.2	23851.3	25791.6	24691.7	19939.4	18655.2	16308.2	19216.4	25102.2	25274.1	24758	27227.2
Alpha-ketoglutarate-dependent dioxygenase FTO	Q8BGW1	Fto	58	8	18.7251	10	502	25.48	978.1	1003.9	1035.6	1021.4	1060.8	1008.8	1010.8	1027	981.1	1017.9	1001.7	992.8	1002	1008.3	1011.3	1005.5
Alpha-mannosidase 2C1	Q91W89	Man2c1	115.6	19	23.9654	23	1039	72.59	1828.9	1909.8	1913.6	1860.2	1921.4	1829.9	1876.6	1895	1870	1880.1	1925.7	1818.5	1811.5	1846.1	1810.9	1847.4
Alpha-methylacyl-CoA racemase	O09174	Amacr	41.7	5	18.6352	5	381	14.95	313.2	321.2	308.9	339.5	321.1	313.5	307.6	297.5	319.8	278.5	311.5	306	307.4	299.3	285.5	299.1
Alpha-N-acetylgalactosaminidase	Q9QWR8	Naga	47.2	3	8.91566	3	415	8.34	246.8	243.5	242.5	246.6	244.6	229.8	246.3	244.1	252.4	254.3	254.2	252.5	250	247.5	241.9	246.7
Alpha-parvin	Q9EPC1	Parva	42.3	4	12.0968	5	372	14.21	521.3	521.9	506.7	529.2	512.4	480.8	508.7	518.3	488.4	504.7	509.1	497.8	464.8	478	504.1	494.5
Alpha-soluble NSF attachment protein	Q9DB05	Napa	33.2	29	92.5424	81	295	268.64	6836.9	6870.8	6905.1	6784.2	6652.8	6602.2	6685.6	6883.6	6760	6684.1	6251.3	6690	6591.4	6910	6901.5	6741.6
Alpha-synuclein	O55042	Snca	14.5	14	92.8571	79	140	271.94	13042.1	11611.9	12075.6	12127.8	13151.3	13033.3	13191.5	12607.7	12827.6	12027.9	13026.3	12224	14116.7	13217.4	13144.3	13426.5
Alpha-taxilin	Q6PAM1	Txlna	62.3	2	5.05415	2	554	2.76	255.9	270.8	254.3	265	253.7	248.5	261.3	251.8	252.3	255.1	253.2	277.8	261.1	262.5	266.7	271.2
Alpha-tocopherol transfer protein-like	Q9D3D0	Ttpal	38.8	5	19.242	7	343	20.58	186.9	187.5	190.8	188.4	198.7	198.1	179.9	190.1	194.4	195.6	190.8	185.9	174.7	174.8	188.1	164.4
Alpha-tubulin N-acetyltransferase 1	Q8K341	Atat1	47.1	16	44.6556	27	421	59.7	2267.3	2133	2291.6	2250.9	2117.2	2190.4	2138	2158.7	2523.9	2505	2533.6	2502.4	2189.9	2317.7	2164	2063.6
Alsin	Q920R0	Als2	182.5	9	7.5106	12	1651	23.37	380.8	360.8	329.9	348.1	360.6	330.8	361.2	330.6	353.1	370.5	334.8	343.1	346.5	344.3	354.1	359.8
Amine oxidase [flavin-containing] A	Q64133	Maoa	59.6	24	46.9582	45	526	133.92	5496.6	5470	5490.1	5627.4	5570.8	5502.5	5428.5	5571.2	5533.7	5684.8	5849.6	5653.8	5476.4	5408.5	5485.9	5438.3
Amine oxidase [flavin-containing] B	Q8BW75	Maob	58.5	19	45.1923	30	520	99.44	3408.5	3414	3468.4	3644.7	3164.6	3112.9	3132	3179.9	3185.7	2996.1	2884.1	2902.4	3016.8	3112.3	3200.8	3138.7
Aminoacyl tRNA synthase complex-interacting multifunctional protein 1	P31230	Aimp1	34	13	60.6452	20	310	69.32	3317.1	3334.3	3381.9	3368	3296.4	3424	3324.1	3329	3647.2	3688	3762.9	3730.7	3387.5	3287.7	3255.2	3362.1
Aminoacyl tRNA synthase complex-interacting multifunctional protein 2	Q8R010	Aimp2	35.4	11	42.8125	15	320	42.32	1509	1450.4	1466.8	1469.6	1479.3	1441.9	1460.9	1465.6	1564.9	1567.6	1526.1	1626.5	1464.8	1443.3	1474.4	1462
Aminoacylase-1	Q99JW2	Acy1	45.8	13	43.6275	17	408	56.14	1795.4	1777.9	1820	1856	1814.8	1792.1	1819.3	1771	1809.3	1769.6	1803.1	1781.8	1790.1	1773.1	1734.4	1823.4
Aminomethyltransferase, mitochondrial	Q8CFA2	Amt	44	3	10.4218	3	403	10.42	352.2	353.8	342.5	352	377.5	378.5	332.3	344.7	339.8	367.3	373	352.1	344.2	320.5	342.1	361.4
Aminopeptidase B	Q8VCT3	Rnpep	72.4	20	39.5385	26	650	79.78	3649.4	3808.3	3632.8	3625	3616.9	3539.5	3583.9	3612.7	3519.3	3614.4	3548.8	3506.8	3645	3614.7	3615.5	3622.2
Aminopeptidase N	P97449	Anpep	109.6	4	6.00414	4	966	6.24	284.3	311.4	314.1	292	307.1	293.1	276.6	257	294.8	303.4	373	328.9	295.5	284.5	288.5	312
AMP deaminase 2	Q9DBT5	Ampd2	92	24	28.6967	33	798	90	4271.9	4302.1	4259	4165.8	4126.7	4161	4117.3	4158.4	4107.2	3955.5	3659.8	3998.6	3921	4084.4	4059.8	3967.5
AMP deaminase 3	O08739	Ampd3	88.6	12	18.0157	13	766	32.67	811.1	835.6	830.7	844.3	841.9	813.9	803	823.4	851.9	862.7	961.2	901.1	832.3	815.9	831.4	809.3
Amphiphysin	Q7TQF7	Amph	75	36	48.5423	104	686	312.35	18996.8	18692	18286.8	18097.6	18349.2	18022.6	18707.4	18427.7	17570.4	17127.1	16556.9	16714.7	18731.8	18915	18325.9	18532
Amphoterin-induced protein 1	Q80ZD8	Amigo1	55.3	3	6.09756	3	492	0	239.2	247.4	242.7	248.8	243.4	232	232.2	239.2	228.3	251.9	235.6	242.4	218.9	246.1	257.6	256
Amyloid-beta A4 precursor protein-binding family A member 1	B2RUJ5	Apba1	92.9	12	21.6152	17	842	45.22	1992.2	1898.5	2032.6	2030.8	2048.7	2049.5	2055.9	2083.6	1880.9	1966.1	2076	1971.2	2048.7	1993.4	2005.3	2062.3
Amyloid-beta A4 precursor protein-binding family A member 2	P98084	Apba2	82.7	8	16.5333	10	750	25.36	770.6	772.8	812.4	765.3	818.9	818.1	803.9	821.9	775.5	801.4	752.6	780.7	790.9	761.5	764.8	768.9
Amyloid-beta A4 precursor protein-binding family B member 1	Q9QXJ1	Apbb1	77.3	9	16.4789	10	710	30.74	808.8	797.2	809.9	815	833.9	813.8	797.4	804.1	760.6	805.6	798.1	807.4	788.5	796.2	806.7	763.9
Amyloid-beta A4 protein	P12023	App	86.7	20	25.1948	40	770	114.07	5017.8	4764.2	4943.1	4816.1	5004.8	4973.5	5056.2	4970.2	5313.6	5146.8	5705.1	5448.9	5226.9	4856.1	4837.2	5181.5
Amyloid-like protein 1	Q03157	Aplp1	72.7	12	18.5299	18	653	42.15	1344.6	1198.7	1214.7	1263.1	1364.8	1281.6	1367.6	1273.6	1316.2	1304.5	1359.9	1337.2	1381.2	1290.7	1252	1282.2
Amyloid-like protein 2	Q06335	Aplp2	80.4	6	8.76945	6	707	12.89	552.1	562.2	542.1	586	581.8	579.8	572.3	571.9	546.9	586	559	597.9	551.4	566.3	534.7	546.8
AN1-type zinc finger protein 2B	Q91X58	Zfand2b	27.9	8	29.572	9	257	20.03	774.9	794.4	787.6	781.3	817.4	842.7	804.6	796.4	770.1	751.8	700.3	759.6	792.9	809.3	792	762.5
AN1-type zinc finger protein 6	Q9DCH6	Zfand6	24	2	6.72646	2	223	3.84	222.5	232.2	217.8	207.3	209.4	193.5	223.5	208.4	211.6	221.8	189.3	235.9	209.9	217.6	211.2	213.9
Anamorsin	Q8WTY4	Ciapin1	33.4	13	58.2524	20	309	58.71	2385	2387	2395.8	2372.4	2487	2479.4	2522.4	2487.1	2510.4	2487	2521.9	2554.9	2461.1	2540.4	2494.5	2529.5
Anaphase-promoting complex subunit 1	P53995	Anapc1	215.9	5	3.49794	5	1944	16.29	230.6	245.7	229	232.7	212.5	222.5	224	225.9	229.3	226	239.4	236.3	219.4	229.7	220.8	221.9
Anaphase-promoting complex subunit 16	Q9CPV2	Anapc16	11.7	2	26.3636	2	110	6.37	184.4	197.2	194.1	189.2	194.6	186.3	182.7	196.8	186.3	181.6	210	192	199.7	191.2	178.4	205.2
Anaphase-promoting complex subunit 4	Q91W96	Anapc4	91.6	2	3.71747	3	807	11.59	209.3	206.8	220.6	207.8	215.6	181.9	194.1	192.1	181.3	194.4	186.9	178.9	181.3	191.8	205.6	221.7
Anaphase-promoting complex subunit 5	Q8BTZ4	Anapc5	83	2	3.78378	2	740	3.38	258.4	252.9	218.5	241.6	249.8	233.5	251.6	246.7	250.2	253.1	261.1	267.8	248.3	253.9	254.6	257.9
Anaphase-promoting complex subunit CDC26	Q99JP4	Cdc26	9.8	4	51.7647	4	85	13.36	597.6	674	631.1	625.5	649.9	636.1	600	604.3	643.2	674.9	715	677.3	651.6	629.9	626.7	684.9
Ancient ubiquitous protein 1	P70295	Aup1	46.1	2	6.09756	3	410	9.44	240.9	245.1	223	233.9	250	235.5	231	234.3	239	257.3	249.1	253.5	220	246.1	254.1	241.1
Angiomotin	Q8VHG2	Amot	120.8	2	2.30906	3	1126	5.12	11.4	10.1	11.8	13.4	10	9.8	10.6	13.2	10.2	12.7	11	15.4	15.9	11.7	11.2	12.1
Angiotensin-converting enzyme	P09470	Ace	150.8	11	9.45122	13	1312	29.91	1085.9	1378.1	1215	1301.7	1162.4	1055.5	1051.6	1090.5	1168.2	930.2	1082.7	993.9	1047	1109.7	1334.7	1374.2
Anillin	Q8K298	Anln	122.7	11	11.3292	13	1121	29.03	1956.8	1956.8	2014.1	2108	1853.9	1913.1	2036.4	1946.1	1654	1561.6	1569	1593.9	1964.5	1976.2	1998.6	2174.3
Anion exchange protein 2	P13808	Slc4a2	136.7	7	7.27567	8	1237	20.46	654.9	755.5	664.2	764.4	649.9	625.2	637	592.2	743.6	518.3	446.1	562.4	553.5	617.6	776	830.7
Anion exchange protein 3	P16283	Slc4a3	135.3	8	8.06846	9	1227	22.62	749.3	751.9	740.2	747.8	744.2	740	758.8	710.8	714.9	728	672.5	714.3	730.5	768.1	776.8	767.8
Ankyrin repeat and IBR domain-containing protein 1	Q6ZPS6	Ankib1	121.8	3	5.80645	4	1085	17.26	151.9	145.7	150.8	138.6	159.4	156.6	167.6	172.7	167.5	169.3	161.2	168.3	171.9	164.4	160.2	159.4
Ankyrin repeat and MYND domain-containing protein 2	Q3TPE9	Ankmy2	48.7	6	15.9091	12	440	32.19	1064.6	983.1	1046.7	1052.7	1017.4	1028.8	1015.7	1004.1	1030.4	1037	951.2	1075.2	935.8	1001	1008.3	995.1
Ankyrin repeat and SAM domain-containing protein 1A	P59672	Anks1a	125.2	2	2.78261	4	1150	14.9	20.8	17.7	13	23.6	15.7	18.6	19.9	20.9	16.8	18.4	16.8	14.7	16.6	15.3	21.2	16.4
Ankyrin repeat and sterile alpha motif domain-containing protein 1B	Q8BIZ1	Anks1b	139	20	15.4091	41	1259	137.27	7629.7	7775.1	7514.1	7255.5	7189.9	6947.8	7281.5	7172.5	6996	7146.7	6567.4	6842.5	7010.4	7442.7	7329.1	7145.9
Ankyrin repeat domain-containing protein 13D	Q6PD24	Ankrd13d	68	2	5.12397	2	605	6.15	17.1	20.1	17.9	20.8	22.4	22.5	22.2	24	26.1	23.2	22.9	21.2	24.8	16.8	19.8	21.6
Ankyrin repeat domain-containing protein 17	Q99NH0	Ankrd17	274	4	2.34345	6	2603	17.9	326.8	368.7	309.5	339.9	300	292.6	318.4	306.2	341.5	370	359.6	355.4	312.5	313	326.3	335.7
Ankyrin repeat domain-containing protein 34B	Q3UUF8	Ankrd34b	55.4	2	6.10236	2	508	7.46	163	152	161.5	175.9	172.2	173.1	167.6	167.2	166.1	165.7	201	169.1	175.4	162.5	167	161.8
Ankyrin repeat domain-containing protein 46	Q8BTZ5	Ankrd46	25.2	2	9.64912	2	228	3.13	382.3	352.7	365.1	350.5	361.3	360.2	343.2	375.9	388.7	363.7	368.4	377.6	357.2	352.2	365	340.8
Ankyrin repeat domain-containing protein 63	A2ARS0	Ankrd63	41	2	4.87179	2	390	2.41	251.7	255.6	246.6	231.8	250.1	238.9	257.6	246.5	248.1	248.4	228.8	272	234.3	246.5	237.5	243.1
Ankyrin-1	Q02357	Ank1	204.1	21	15.0376	24	1862	73.99	1194.1	1202.5	1209.9	1204.9	1193.4	1150	1185.3	1172.9	1168.8	1122.7	1186.5	1175.7	1144.4	1143.7	1129.2	1150.6
Ankyrin-2	Q8C8R3	Ank2	426	203	65.3669	446	3898	1520.92	61287.8	60264.5	61717	62064.1	61420.9	63385.7	62732.2	62815.1	61505.6	61612.6	60130.5	62453.1	61345.3	61534	61523.2	60599.7
Ankyrin-3	G5E8K5	Ank3	213.9	79	48.1897	125	1961	415.06	11676.8	11724.6	11952.3	11906.5	11382.7	11752.2	11785.2	11807.2	11050.9	11040.8	10314.4	10987	11415.6	11757.8	11585.6	11727.9
Annexin A1	P10107	Anxa1	38.7	2	8.3815	3	346	14.26	150.1	188.6	190.5	165.5	157.6	140.8	140.5	139.5	151.8	168.7	235.2	170.1	165	142.7	151.8	171.2
Annexin A11	P97384	Anxa11	54	16	34.1948	23	503	69.07	1896.5	2072.3	2019.9	1947.7	1940.5	1877.5	2018.4	1917.1	1964.6	1892.2	1640.8	1939.9	1859.7	1982.2	1907.2	1947.2
Annexin A2	P07356	Anxa2	38.7	19	62.8319	22	339	78.41	2658.3	3091.8	2883.4	2654	2690	2417.3	2205	2325.3	2509.4	2806.4	4516.1	2658.5	2810.1	2402.9	2782.1	2840.7
Annexin A3	O35639	Anxa3	36.4	8	29.1022	9	323	30.47	879.8	937.2	915.1	874.2	887.9	839.6	803.5	828	822.8	893.6	1131.6	885	923.1	852.2	898.7	926.9
Annexin A4	P97429	Anxa4	35.9	7	25.3918	10	319	19.93	347.8	385.8	370	361.9	324.7	315.1	350.2	303.6	330	332.1	364.9	315.9	334.5	315.2	354.1	368.4
Annexin A5	P48036	Anxa5	35.7	31	80.8777	65	319	193.2	10655.6	10685.1	10433.9	10735.4	9621.3	9680.9	9438.5	9722.2	8942.4	9527.4	10973.3	8698.6	9960.5	9632.9	10051.6	10506.6
Annexin A6	P14824	Anxa6	75.8	51	73.997	108	673	340.45	17243	17516.1	17453.2	17323.8	16442.5	16260.4	16603.8	16420.7	18119.2	17544.3	17611.6	17564.9	17051.1	17055.3	17564.3	17296.2
Annexin A7	Q07076	Anxa7	49.9	23	47.0842	54	463	147.81	6821.9	6614.5	6735.1	6755.8	6546.7	6352.2	6689.4	6389.7	6427.5	6222.1	6581.9	5956.5	6693.9	6578.9	6572.7	6553.6
Anoctamin-10	Q8BH79	Ano10	76.1	2	3.33839	2	659	6.24	206.6	210.7	205.5	203.3	175.3	192.2	192.3	193.6	201.6	201	194.8	208.7	191.6	187.8	208	190.9
Anoctamin-8	Q6PB70	Ano8	119	3	3.77358	4	1060	6.99	87.3	84.8	86.6	83.1	76.4	90.5	84.5	84.4	84.6	86.5	88.9	99.9	85.1	83.5	88.4	87.8
Antithrombin-III	P32261	Serpinc1	52	3	10.3226	3	465	10.26	224.1	263.4	228.2	261.2	247.2	218.1	213.6	203.3	239.2	204.4	246.2	228.1	222.6	228.9	197.4	225.2
AP-1 complex subunit beta-1	O35643	Ap1b1	103.9	62	61.5058	136	943	426.57	7362.9	7434.5	7308.3	7277.7	7257	7081.9	7247.9	7075.9	7184.7	7175.8	7357.7	6854.4	7238.9	7346.6	7248	7064.9
AP-1 complex subunit gamma-1	P22892	Ap1g1	91.3	28	35.5231	42	822	126.29	6056	6272.2	6359.2	6270.4	6148.4	5960.8	6236.5	6204.2	6234.8	6484.6	6060.2	6289.5	6048.7	6379.1	6283.3	6274.3
AP-1 complex subunit mu-1	P35585	Ap1m1	48.5	16	46.0993	26	423	81.45	3538.2	3623.6	3622.3	3620.5	3560.3	3568.8	3559.4	3472	3596.7	3658.9	3644.4	3700.7	3535.1	3539.6	3585.4	3548.7
AP-1 complex subunit sigma-1A	P61967	Ap1s1	18.7	5	38.6076	6	158	19.26	571.4	576.5	583.2	607.2	594	600.1	619.9	573	608.1	603.9	657.5	600.5	596.6	614.1	572.3	557.4
AP-1 complex subunit sigma-2	Q9DB50	Ap1s2	18.9	2	10.625	3	160	7.06	202.2	201.5	194.9	196.5	195.8	183.4	182.7	194.1	194.6	195.8	176.6	193.6	168.3	173.5	186.4	170.8
AP-2 complex subunit alpha-1	P17426	Ap2a1	107.6	65	69.089	164	977	504.26	26099.2	26051.8	25991.9	25908	25716.5	24832.8	25417.7	25308	24301.4	25314.3	24811.9	23813.3	25555.9	25989.9	25635.3	25153.8
AP-2 complex subunit alpha-2	P17427	Ap2a2	104	63	66.0981	182	938	577.93	16102.2	15605.1	15620.6	15475.1	15474.5	14962.6	15276.6	15173.5	14843.2	15127.3	14623.2	14424.4	15285.7	15426.1	15430	14860.7
AP-2 complex subunit beta	Q9DBG3	Ap2b1	104.5	69	63.9274	200	937	656.71	35268.1	35765.8	35061.4	34939.3	33960	33313.9	34512.4	33815.8	33339.3	34163.6	33574.1	32668.1	34412.8	35077.9	34575	33804.6
AP-2 complex subunit mu	P84091	Ap2m1	49.6	37	68.046	102	435	313.39	22283	21959.8	21836	21819.8	21823.1	21312	21836.6	21540.7	20962.6	21433.4	21108.7	20760.3	21651.4	22425.7	22011.6	21615.6
AP-2 complex subunit sigma	P62743	Ap2s1	17	10	50.7042	22	142	65.37	3614.9	3707.2	3716.6	3601.7	3517.6	3310	3506	3533.7	3384.2	3581.4	3478.7	3345.3	3536.3	3577.6	3597.7	3611.3
AP2-associated protein kinase 1	Q3UHJ0	Aak1	103.3	45	70.5944	117	959	416.11	13430.9	12889	13223.6	12989.3	12599.7	13091.9	12887	12990.1	12602.8	12380.9	12082.3	12241.6	12683.7	12488	12548.2	12402.8
AP2-interacting clathrin-endocytosis protein	Q80TK0	Kiaa1107	134	29	27.9257	37	1239	106.18	4713.8	4737.3	4734.8	4758.8	4811.7	5068.7	4830.2	4880.8	4777.2	4759.8	5153.7	4791.6	4931.9	4726.4	4760.4	4722.8
AP-3 complex subunit beta-1	Q9Z1T1	Ap3b1	122.7	13	12.2172	16	1105	29.08	313.8	331	307.2	322.6	321.7	313.2	307.6	317.5	319.6	300.3	337.9	338.2	309.1	294.3	307	331.2
AP-3 complex subunit beta-2	Q9JME5	Ap3b2	119.1	46	43.9002	77	1082	198.13	10505.2	10861	10631.3	10794.6	10582	10475.1	10593.8	10572.4	10739.9	10934	10881.2	10599.7	10554.4	10822.6	10641.7	10463.1
AP-3 complex subunit delta-1	O54774	Ap3d1	135	43	40.4504	86	1199	296.11	12727.1	13035.6	13081.2	13038.8	12945.6	13161.4	13080.8	13140.1	12780.3	13497.8	13000.6	13414.6	12795	13358.2	13098.7	12873.1
AP-3 complex subunit mu-1	Q9JKC8	Ap3m1	46.9	11	41.1483	13	418	36.83	803.9	830.4	835.5	872.6	872.8	849	869.7	866	844.3	826.9	809	849.8	797	846.4	823.3	844.6
AP-3 complex subunit mu-2	Q8R2R9	Ap3m2	46.9	15	49.7608	30	418	103.56	4411	4325.9	4257.8	4307.1	4206.7	4127.6	4318.2	4189.7	4103	4280	4175.6	4132	3998.5	4181.4	4178.5	4079.9
AP-3 complex subunit sigma-1	Q9DCR2	Ap3s1	21.7	8	34.715	11	193	29.93	1287.8	1245.2	1225.5	1201.8	1254.9	1275	1279.8	1280.9	1252.7	1289.8	1274.1	1346.8	1250.1	1310.7	1352.6	1290.8
AP-3 complex subunit sigma-2	Q8BSZ2	Ap3s2	22	6	28.4974	8	193	22.29	843.6	788.1	821.1	752.4	830.5	749.7	760.9	737.7	767.1	823.3	775.5	767.6	742.4	751.8	762	706.9
APC membrane recruitment protein 2	Q8CCJ4	Amer2	69.9	13	26.0417	16	672	55.71	2670.7	2648.4	2718.3	2657.5	2818	2867.3	2765.9	2840.7	2699.5	2618.5	2740.1	2716	2743.3	2675.6	2686.8	2656.5
Apical junction component 1 homolog	A2AJA9	Ajm1	107.1	33	38.9117	41	974	102.31	4198.8	4097.8	4156.9	4071.7	4123	4124.7	4078.3	4082.4	3977.5	4078.9	4018.4	3867.3	4046	4001.3	4044.9	3998.9
Apolipoprotein A-I	Q00623	Apoa1	30.6	21	70.0758	40	264	111.64	6555.3	7945.6	6612.7	6773.6	6463.3	5602.4	5276.3	5665.8	6767.8	5893.6	7732.3	6139.2	6165.9	5639.1	5805.4	6777.6
Apolipoprotein A-IV	P06728	Apoa4	45	8	23.5443	9	395	16.9	482.5	515.5	500.4	495.3	481.8	415.4	420.6	447.9	477.9	438.8	482.3	436.2	473.9	436.8	453.6	503.4
Apolipoprotein C-III	P33622	Apoc3	11	3	50.5051	5	99	22.87	536.1	619.1	549.4	560.6	501.2	410.1	375.2	404.7	473.6	459.5	591.8	475	468.8	403.8	441.4	456.2
Apolipoprotein D	P51910	Apod	21.5	2	10.0529	2	189	4.04
Apolipoprotein E	P08226	Apoe	35.8	21	63.6656	47	311	124.64	5344.9	5664.8	5501	5276.1	5507.8	5119.5	5390.4	5446.8	5240.1	5303	5478.6	5163.9	5284.2	5289.8	5340.5	5488.9
Apoptosis inhibitor 5	O35841	Api5	56.8	15	33.1349	19	504	61.76	2842.7	2938.8	2858.7	2880.4	2836.8	2744.4	2781.9	2761.2	2902.8	2941.8	2981.4	2946.8	2724.8	2802	2814.8	2788.4
Apoptosis regulator BAX	Q07813	Bax	21.4	3	20.8333	4	192	12.31	337.1	358.7	317.6	312.7	356.2	345.1	330	340.3	360.7	352.5	362.6	392.3	339.4	344.4	319.8	340.1
Apoptosis-inducing factor 1, mitochondrial	Q9Z0X1	Aifm1	66.7	24	48.8562	47	612	162.77	6449.5	6546.5	6322.1	6347.1	6442.5	6303.4	6254.8	6338.6	6166.3	6103.2	6034.6	6170.1	6041.9	6197	6604.6	6179.7
Apoptosis-inducing factor 3	Q3TY86	Aifm3	66.8	16	33.3884	19	605	41.64	1643.3	1716.1	1675.6	1710.6	1664.4	1654.6	1632	1596.2	1606.3	1596.5	1637.3	1593	1596.1	1645.9	1705.3	1693.3
Apoptosis-stimulating of p53 protein 1	Q62415	Ppp1r13b	119.1	11	11.5915	13	1087	32.13	1786.5	1823.9	1871.6	1794	1839.9	1795.9	1793.2	1769.9	1790.7	1821.2	1759.1	1789.1	1769.1	1841.9	1750.9	1755.7
Apoptosis-stimulating of p53 protein 2	Q8CG79	Tp53bp2	125.2	5	4.78723	7	1128	8.97	618.5	592.7	593.4	561.6	584.1	588.1	606.3	588.6	623.1	608.4	563.6	592.5	581.2	592.3	548.8	576.9
Apoptotic chromatin condensation inducer in the nucleus	Q9JIX8	Acin1	150.6	18	13.9761	20	1338	52.93	2254.3	2404.4	2288.1	2383.8	2370.1	2368.6	2271.7	2309.6	2429.4	2411.1	2470.6	2448.6	2312.2	2316.7	2318	2323.2
Aquaporin-1	Q02013	Aqp1	28.8	3	13.3829	3	269	7.88	233.5	287	247	287.4	246.4	230	245.4	241.5	282.5	212.3	200.5	271.1	210.6	257.5	297.4	288.9
Aquaporin-4	P55088	Aqp4	34.4	8	19.195	18	323	55.78	2043	1969.5	2054.9	2015.1	2222.4	2230.5	2087.2	2185.1	1795.2	1814.4	1620.2	1810.6	2112.4	2070.3	2342.2	2104.6
ARF GTPase-activating protein GIT1	Q68FF6	Git1	85.2	43	63.5065	57	770	160.58	7457.7	7619	7667.9	7365.4	7383.5	7438.3	7435.7	7419.3	7505	7254.9	7293.7	7519.3	7500.5	7435.5	7390.8	7437.5
ARF GTPase-activating protein GIT2	Q9JLQ2	Git2	78.7	7	12.5706	12	708	18.2
Arfaptin-2	Q8K221	Arfip2	37.7	11	37.5367	14	341	38.1	2524.9	2599.9	2532.9	2612	2606.6	2562.3	2575.5	2615.3	2546.3	2565	2677.1	2654.3	2559.8	2617.1	2603.7	2629.7
Arf-GAP domain and FG repeat-containing protein 1	Q8K2K6	Agfg1	58	14	26.5597	39	561	100.11	3388.3	3316.6	3323.2	3282.8	3378.7	3381.5	3375.6	3279.9	3457.6	3524.7	3488.8	3374.9	3375.6	3301.7	3310.5	3218.1
Arf-GAP domain and FG repeat-containing protein 2	Q80WC7	Agfg2	48.9	11	30.8977	18	479	58.98	1914.6	1879	1915.6	1911	1905.5	1900.3	1890.5	1821.5	1898.5	1794.1	1868.8	1824.7	1959.9	1881.2	1891.9	1844.3
Arf-GAP with coiled-coil, ANK repeat and PH domain-containing protein 2	Q6ZQK5	Acap2	87.2	17	26.1039	26	770	78.59	3319.1	3462.4	3403.5	3391.2	3375.3	3386	3573.9	3412.3	3610.5	3477.3	3369.2	3632.7	3401.9	3489.9	3482	3362.5
Arf-GAP with GTPase, ANK repeat and PH domain-containing protein 1	Q8BXK8	Agap1	94.4	10	14.3524	12	857	38.66	797	773.6	755.2	764.2	782.5	781.9	763.3	753.5	751.9	769.3	766.1	779.8	718.3	719.6	748.7	765.3
Arf-GAP with GTPase, ANK repeat and PH domain-containing protein 2	Q3UHD9	Agap2	124.4	43	47.3019	72	1186	252.15	11259.3	11575.8	11210.3	10778.1	10972.3	10662.2	10964.3	10904.4	11137.5	11293.4	10533.2	11660.7	10437	10951.4	10807.3	10405.8
Arf-GAP with GTPase, ANK repeat and PH domain-containing protein 3	Q8VHH5	Agap3	97.9	18	20.8791	32	910	98.81	4101.1	4195.8	4302.6	4213.7	3986.7	3993.5	4132.1	3977.6	4309.5	4328.8	4173	4286.6	3970.7	4172.8	4084.3	4043.1
Arf-GAP with Rho-GAP domain, ANK repeat and PH domain-containing protein 2	Q8BZ05	Arap2	193.3	2	1.82032	2	1703	5.29	67.7	80.7	71.5	76.5	75.3	79.1	67.5	69	78.6	68.7	71.2	75.4	66.7	76	74.4	72.8
Arf-GAP with SH3 domain, ANK repeat and PH domain-containing protein 1	Q9QWY8	Asap1	127.3	26	27.5501	38	1147	127.88	4981.6	5103.4	5132.7	5106.5	5012.1	5053.5	5067.1	5084.7	5047.7	5520.7	5700.2	5258.7	5042.6	5030.7	5063.2	4991
Arf-GAP with SH3 domain, ANK repeat and PH domain-containing protein 2	Q7SIG6	Asap2	106.7	16	20.5637	20	958	55.96	2634.5	2735.3	2823.9	2744.8	2836.7	2738	2834.9	2807.1	2663.3	2828.5	2633.4	2877.2	2608.4	2820.6	2732.4	2744.9
Arginine and glutamate-rich protein 1	Q3UL36	Arglu1	32.9	7	17.3432	7	271	16.74	971.2	1016.8	999.8	1023.5	1050.2	1009.6	1033.5	1030.4	1006.1	1048.3	1058.3	1075	983.8	978.6	997.9	1055.5
Arginine-hydroxylase NDUFAF5, mitochondrial	A2APY7	Ndufaf5	38.4	5	17.4927	5	343	19.4	718	706.6	716.4	693.8	719.1	714.5	652.8	675.5	677.3	702.4	683.6	713.2	660.7	685.6	670.2	696.7
Arginine--tRNA ligase, cytoplasmic	Q9D0I9	Rars	75.6	26	41.5152	36	660	97.5	5028.6	5798.1	4726.4	4731	4825.9	4654.3	4636.8	4654.7	4840.1	4873.4	4856.7	4985.2	4554.5	4706.4	4988.1	4648.1
Argininosuccinate lyase	Q91YI0	Asl	51.7	12	29.7414	16	464	47.99	1921.3	1891.7	1841.3	1904.5	1821.5	1713.9	1742.7	1776.3	1760.9	1820.8	1916.2	1700.3	1797.9	1818.9	1831.6	1909.9
Argininosuccinate synthase	P16460	Ass1	46.6	20	58.0097	24	412	66.69	2060.5	2118.1	2047.9	2126	1926.6	1918.4	1890.1	1973.2	1622.5	1700.4	1762.6	1569.4	1876.6	1883.8	1845.5	1904.1
Arginyl-tRNA--protein transferase 1	Q9Z2A5	Ate1	59.1	9	25	11	516	35.78	1419.7	1423.6	1488.6	1401.3	1453.5	1423.7	1381	1441.3	1410.4	1372.9	1339.4	1430.2	1357.8	1401.6	1416.4	1412.2
Armadillo repeat protein deleted in velo-cardio-facial syndrome homolog	P98203	Arvcf	105	15	24.5322	18	962	71.24	1204.2	1186.9	1221.5	1174.7	1175.1	1212.4	1188.6	1193.8	1197.8	1198.9	1195.8	1240.5	1172.8	1155.9	1175.5	1201.2
Armadillo repeat-containing protein 1	Q9D7A8	Armc1	31.2	13	51.773	18	282	54.97	2248.1	2268.1	2172.7	2210.5	2241.5	2161.5	2205.8	2192.5	2136.1	2200.7	2075.3	2157.4	2129.6	2296.4	2248.1	2287.6
Armadillo repeat-containing protein 10	Q9D0L7	Armc10	33.3	11	45.7516	24	306	81.13	1979.5	2072.3	2019.2	2047.9	1968.4	1904.5	1905.8	1976.6	1974.1	2029.7	2057.6	2016.9	1896.3	1913.4	1965.9	1905.8
Armadillo repeat-containing protein 6	Q8BNU0	Armc6	50.7	12	33.1197	14	468	57.31	2005.9	2027.2	2057.2	2029.7	2101	2146.1	2141.2	2136	2181.1	2216.4	2209.9	2270.8	2152.5	2132.8	2148.3	2150.2
Armadillo repeat-containing protein 8	Q9DBR3	Armc8	75.3	6	12.9272	8	673	26.7	246.6	251.5	258.4	264.1	259.3	247.3	267.4	263.8	254	258.7	266.2	247.7	245.8	258.7	258	246.5
Armadillo repeat-containing X-linked protein 3	Q8BHS6	Armcx3	42.6	3	11.3456	4	379	15.05	205.2	201.5	210.3	204.9	188.5	182.3	186.9	194.8	203.2	217.4	192.6	195	193.6	193.9	208	199.3
Armadillo-like helical domain-containing protein 3	Q6PD19	Armh3	78.6	5	9.86938	5	689	9.63	390.4	378.6	378.5	369.3	360.7	361.1	375.2	372.2	421.9	422.3	401.7	401	363	384.5	404.2	374.3
Arpin	Q9D0A3	Arpin	25.2	6	25.2212	6	226	13.14	675.9	682.6	624.8	662.8	703.3	702.6	724	707.5	677.9	676.2	699.4	665.4	716.8	683.8	699.4	670.2
Arsenite methyltransferase	Q91WU5	As3mt	41.8	4	14.6277	4	376	11.06	248.9	249.8	233	231.6	226	220.2	235.2	232.2	217.4	223.5	238.1	218.8	219.1	217.4	227.2	239.8
Arylsulfatase A	P50428	Arsa	53.7	6	16.7984	8	506	30.88	227.3	244.7	248.2	255.2	276.1	240.3	232.5	262.4	257.3	262	278.1	251.6	270.6	256.4	255.7	269
Arylsulfatase B	P50429	Arsb	59.6	14	27.3408	35	534	96.17	3537	3582.3	3525.7	3554.2	3689.7	3602.5	3617.8	3647.9	3672.9	3733.7	3868.5	3849.5	3717.6	3547.4	3672.5	3755.2
Asc-type amino acid transporter 1	P63115	Slc7a10	57.5	2	2.64151	2	530	3.6	131.3	119.8	126.7	121	144.3	121.3	134.1	131.6	119.3	126.9	114	127.6	122.4	137.1	124	124.8
Asparagine synthetase [glutamine-hydrolyzing]	Q61024	Asns	64.2	19	40.4635	31	561	101.86	3730.2	3674.3	3670.3	3815.9	3794.6	3790.7	3717.6	3763.3	3848.2	3915.4	4012.8	3978.3	3771.4	3659	3664	3679.7
Asparagine--tRNA ligase, cytoplasmic	Q8BP47	Nars	64.2	28	47.7639	50	559	159.06	5944.7	6055.4	5798.6	6125.1	5934.3	5938.5	5976.2	6191.5	5992.8	5998	5955.3	6110.3	5879.4	6201.2	5900.7	5918.8
Aspartate aminotransferase, cytoplasmic	P05201	Got1	46.2	32	73.3656	104	413	314.58	20248.6	19820.5	20060.5	19353.3	18738.7	18552.5	18474.1	18869.7	18271.7	18177.9	19418.1	17162.8	19751.7	18865.5	18856.7	19702.5
Aspartate aminotransferase, mitochondrial	P05202	Got2	47.4	42	80.2326	160	430	567.51	33952.4	32868.1	33464.6	32393.7	32821.6	32171.7	32253.7	32693.2	30009.7	30239.9	30061.7	28566.1	32601.1	32901	32823.8	32391.9
Aspartate beta-hydroxylase domain-containing protein 2	Q80VP9	Asphd2	38.7	8	39.0671	10	343	33.59	780.9	804.8	798.9	798.7	757.9	783.3	798.5	772.2	759.6	755	712.4	746.3	782.6	773.9	769.1	735.7
Aspartate--tRNA ligase, cytoplasmic	Q922B2	Dars	57.1	30	64.4711	44	501	121.6	5468.1	5432.7	5419	5491.5	5508.7	5394.9	5487.2	5424	6006.6	5898.7	5860	5967.7	5492.2	5485.8	5429	5413.2
Aspartoacylase	Q8R3P0	Aspa	35.3	8	30.4487	11	312	35.89	1152.5	1124.8	1258.1	1315.4	1149.8	1236.8	1264.8	1264.8	1098.2	1046	951	1008	1207	1191.6	1207.4	1321
Aspartyl aminopeptidase	Q9Z2W0	Dnpep	52.2	18	52.0085	31	473	120.68	3041.8	3109.5	3051.9	3026.9	3059.1	2986.3	2958	3014.8	3031.8	3108.1	3205.3	3204.5	2903	2911.6	3015.8	3039.7
Aspartyl/asparaginyl beta-hydroxylase	Q8BSY0	Asph	83	2	4.45344	3	741	9.46	404.6	441.6	395	396.9	405.2	377.8	388.1	375.9	435.4	393.6	401.2	397.7	373.9	354.4	380.1	385.4
Astrocytic phosphoprotein PEA-15	Q62048	Pea15	15	11	67.6923	27	130	89.99	5333	5447.4	5381.2	5502.6	5264.9	5353.1	5127.2	5195.1	4777.3	5028.5	5074	4707.6	5222.2	5004	5197.9	5544
Astrotactin-1	Q61137	Astn1	144.8	31	31.7204	44	1302	150.35	4429.1	4274.5	4293.7	4238.5	4243.4	4309.9	4296.1	4228.2	4442.8	4563.3	4197.2	4579.5	4146.6	4181.4	4130.4	4019.6
Astrotactin-2	Q80Z10	Astn2	149.3	3	3.99408	3	1352	11.53	48.9	53.7	55	46	49	62.1	61.3	60.2	45.7	59.7	54.8	58.7	51.2	48.5	54.5	54.4
Ataxin-10	P28658	Atxn10	53.7	15	36	28	475	98.17	3341.6	3325.7	3351.4	3427	3456.3	3464.8	3480.6	3446.7	3565.9	3614.9	3646.6	3694.6	3506.8	3472.1	3566.1	3468.5
Ataxin-2	O70305	Atxn2	136.4	20	17.821	22	1285	52.56	2190.2	2163.2	2216.2	2167.6	2378.4	2163.8	2262.4	2257.3	2241.9	2302	2352.4	2336.4	2140.7	2138.2	2176.2	2318.1
Ataxin-2-like protein	Q7TQH0	Atxn2l	110.6	19	22.021	26	1049	65.67	4146.2	4082.6	4088.6	3943.7	4153.8	4041	4086.1	4102.7	4116.6	4281.1	4127.6	4326.2	3913.5	4229.5	4075.1	4053.2
Atlastin-1	Q8BH66	Atl1	63.3	27	53.7634	43	558	135.42	7021.6	7185.9	7013.2	7269.7	6967.2	6903	7130.8	7112.1	7014.4	7269.3	7213.1	7105.1	6968.9	7254.5	7075.7	7204.1
Atlastin-2	Q6PA06	Atl2	66.2	5	12.5214	9	583	32.94	455.5	467.1	467.9	461.6	448.7	442.7	472.3	453.4	485.2	491.9	470.4	462.9	457.2	435.8	480.8	442
Atlastin-3	Q91YH5	Atl3	60.5	6	15.1571	10	541	24.92	876.2	878.8	857.8	859.5	849.3	846	844.2	848.4	803	846.1	782.9	815.5	816	830.6	881.2	847.8
ATP synthase F(0) complex subunit B1, mitochondrial	Q9CQQ7	Atp5pb	28.9	20	55.8594	52	256	130.82	10550.9	10423.8	10538.7	10491.1	11011.7	10538.7	10865.6	10530.7	10341.7	10480.5	10040.6	10003	10535.6	10802.1	10874.2	10494.5
ATP synthase membrane subunit DAPIT, mitochondrial	Q78IK2	Atp5md	6.4	2	18.9655	3	58	11.91	851.7	937.5	886.8	898.1	852.5	815.6	888.7	851.9	853.8	879.4	818.7	861.2	856.7	953.6	892.1	877.5
ATP synthase mitochondrial F1 complex assembly factor 1	Q811I0	Atpaf1	36.3	8	32.4074	8	324	21.46	973.7	914.8	941.5	926.5	957.1	951.3	941.7	919.2	858.8	904	903.1	887.9	921.6	992.4	1011.5	986.9
ATP synthase protein 8	P03930	Mtatp8	7.8	2	26.8657	8	67	19.96	1775.1	1646.9	1739.9	1787.2	1773.5	1844.3	1815.6	1773.6	1719	1798.9	1751.3	1784.3	1790.6	1829.9	1761	1743.5
ATP synthase subunit alpha, mitochondrial	Q03265	Atp5f1a	59.7	58	78.1193	452	553	1379.21	58257.7	56213.6	57057	56349.1	58987.2	57438.1	57883.4	57604.9	55557.2	55753.3	55215.2	53609.7	58368.5	58480.1	58999.4	58078.3
ATP synthase subunit ATP5MPL, mitochondrial	P56379	Atp5mpl	6.7	2	34.4828	13	58	21.79	1555.5	1514.6	1607.2	1551.7	1639.7	1628.8	1588	1571.7	1563.8	1619.7	1506.6	1568.1	1580.6	1601.2	1578.6	1544.7
ATP synthase subunit beta, mitochondrial	P56480	Atp5f1b	56.3	34	79.3951	441	529	1527.32	52776.2	51843.3	53850.7	52526.3	54073	53266.3	52563.2	53917.3	52197.4	51293.7	51032.2	49716.7	53603.4	53601.7	53603.5	53819.1
ATP synthase subunit d, mitochondrial	Q9DCX2	Atp5pd	18.7	19	92.5466	98	161	255.48	17292.7	17042.1	17227.6	17122.6	18176.2	18038.4	17715.6	17951.4	16852.6	16760.3	16223	16558.8	17518.2	17776	17810.6	17537
ATP synthase subunit delta, mitochondrial	Q9D3D9	Atp5f1d	17.6	4	58.3333	13	168	37.14	2152.5	2108	2030.8	2020.9	2174.9	2183	2095.4	2106.5	1982.7	1927.9	1949.3	1850	2090.7	2017.1	2081.9	2130
ATP synthase subunit e, mitochondrial	Q06185	Atp5me	8.2	8	85.9155	17	71	53.06	5356.6	5241.3	5225.5	5242.1	5591.9	5590.2	5534.7	5490.5	5120.1	5120.1	5167.7	5010.4	5461.4	5642.9	5604.9	5405.4
ATP synthase subunit epsilon, mitochondrial	P56382	Atp5f1e	5.8	4	57.6923	10	52	18.78	3204.1	3042.2	3031.9	3015.7	3050.8	2829.8	2957	3024.2	2878	2957.1	3007.6	2701.4	3075.3	3140.6	3111.3	3138.1
ATP synthase subunit f, mitochondrial	P56135	Atp5mf	10.3	3	32.9545	24	88	53.69	3086.5	3020.3	3055.5	3044.3	3124.7	2976.9	3066.6	2931.2	3163.8	3118.7	3135.5	3105.9	3145.4	3004	3012.1	2979.5
ATP synthase subunit g, mitochondrial	Q9CPQ8	Atp5mg	11.4	6	53.3981	22	103	89.7	4688.9	4800.7	4715.1	4887.8	4896.8	4863.2	4923.1	4841.2	4737.1	4840.4	4464.6	4660.9	4655.8	4941.5	4906.3	4721.8
ATP synthase subunit gamma, mitochondrial	Q91VR2	Atp5f1c	32.9	22	52.349	112	298	270.54	20276.5	19570.8	19515.2	19904.6	19573.1	18851.4	19738.2	19383.7	19364.8	19740.5	19107.3	18187.7	19877.1	20158	20069	19753
ATP synthase subunit O, mitochondrial	Q9DB20	Atp5po	23.3	22	76.9953	81	213	253.61	13793.9	13437.7	13863.2	13422.1	14372.1	14173.6	14024.2	14084.5	13232.6	13220.7	13240	12994	13692.3	13951.3	14174.5	13677.2
ATP synthase subunit s, mitochondrial	Q9CRA7	Dmac2l	23.3	8	47.5	11	200	31.09	1159	1221.2	1263.2	1280.7	1179.1	1230	1174.4	1270	1284.2	1295.1	1256.1	1319.8	1143.8	1246.9	1183	1239.4
ATP synthase-coupling factor 6, mitochondrial	P97450	Atp5pf	12.5	7	56.4815	33	108	88.79	7035.3	6931	6935.6	6837.8	7255.1	7339.6	7190.4	7141.4	6751.3	6892.5	6832.1	6883.3	7159.7	7058.9	7193.2	7191.4
ATPase Asna1	O54984	Asna1	38.8	14	58.6207	28	348	97.28	2576.7	2644	2650.5	2692.4	2511.6	2645.7	2623.8	2610.3	2661.2	2629.9	2651.2	2683.4	2608.6	2583.3	2536.1	2556.9
ATPase family AAA domain-containing protein 1	Q9D5T0	Atad1	40.7	11	37.6731	19	361	50.76	1303.1	1346.7	1341	1334.9	1352.6	1370.1	1329.6	1347.7	1391.6	1447.4	1386.8	1437.1	1302.4	1312.3	1292.2	1304.8
ATPase family AAA domain-containing protein 3	Q925I1	Atad3	66.7	31	50.423	57	591	161.01	7814.3	7794	7864.4	7844.3	8201.5	8148.9	8000.2	8157.4	8176.9	8229.4	8036.8	8225.5	7762.1	7852.8	7975.9	7793.3
ATPase inhibitor, mitochondrial	O35143	ATP5IF1	12.2	15	49.0566	42	106	76.22	8514.1	8300.7	8243.5	8463.7	8837.7	9143	8721.1	8760.7	8767.1	8601.4	9416.2	8558	9045.1	8487.6	8451.7	8797.6
ATPase WRNIP1	Q91XU0	Wrnip1	71.7	3	5.75758	4	660	14.62	371.2	378.6	407.5	431.2	402.9	438.4	407.6	430.7	396.2	399.3	406	411	412.3	386.1	423.7	397.3
ATP-binding cassette sub-family A member 2	P41234	Abca2	270.3	2	0.821693	2	2434	2.92	70.9	62.2	61.4	74.5	69.7	62.9	58.5	67	76.3	60	69.5	66.9	64.9	64	62.3	64.4
ATP-binding cassette sub-family B member 6, mitochondrial	Q9DC29	Abcb6	93.7	2	3.56295	2	842	5.62	47.8	55	51.3	51.2	51.7	49.9	49.1	50.2	59.6	61	60.7	55.8	54.6	54.9	57.7	54.5
ATP-binding cassette sub-family B member 7, mitochondrial	Q61102	Abcb7	82.5	20	28.7234	22	752	47.71	1833.8	1844.7	1817.5	1808.1	1776.1	1758.7	1790.4	1800.7	1733.9	1777.8	1720.2	1733.9	1777.9	1803.6	1778.2	1756.7
ATP-binding cassette sub-family B member 8, mitochondrial	Q9CXJ4	Abcb8	78	16	30.1255	19	717	59.44	1867.6	1873.9	1893.6	1945.2	1854.6	1843.7	1816.6	1815	1677.1	1690.8	1696.4	1691.5	1845.3	1915.3	1895.2	1873.9
ATP-binding cassette sub-family B member 9	Q9JJ59	Abcb9	83.9	4	8.39895	6	762	18.41	95.1	99.9	94.4	103.7	105.4	94.2	106.5	106.2	109.8	104.1	99.4	97.6	104.2	100.9	94.1	106.5
ATP-binding cassette sub-family D member 2	Q61285	Abcd2	83.4	2	3.50877	3	741	5.75	127.1	119.6	130.4	133.4	145.3	138.4	136	151	143.1	141.1	150.2	151.2	126.7	129.2	124.7	127.2
ATP-binding cassette sub-family D member 3	P55096	Abcd3	75.4	10	21.0926	16	659	51.32	1761.5	1862.8	1772.8	1871.9	1745.1	1762.8	1746	1771	1952.1	1970	1986.6	2068.2	1768.1	1794.5	1789.9	1726.3
ATP-binding cassette sub-family E member 1	P61222	Abce1	67.3	22	44.7412	35	599	101.13	5054.9	5058.1	4988.9	5006.7	5014.9	4872.5	5047	4987.5	5389.6	5454.3	5529	5867.5	5124	5363.9	5261.5	5396.4
ATP-binding cassette sub-family F member 1	Q6P542	Abcf1	94.9	13	23.5364	16	837	39.79	923.5	917.1	915.2	893.7	940.8	913.5	905	929.2	920.6	950.1	905	969.5	860.3	911.4	878.8	857.6
ATP-binding cassette sub-family F member 2	Q99LE6	Abcf2	71.7	8	15.1274	10	628	32.48	914.1	892.1	918.9	929.2	949.6	929.7	932.3	898.3	963.2	923.5	937.5	945	884.7	906.5	890.1	908.5
ATP-binding cassette sub-family F member 3	Q8K268	Abcf3	79.8	10	22.0028	11	709	36.56	634.7	674.7	653.2	655	672.7	662	633.1	621	666.6	633.5	674.9	663.9	643.7	638.2	632	637.7
ATP-binding cassette sub-family G member 2	Q7TMS5	Abcg2	72.9	3	4.414	3	657	7.92	325.3	376.8	313.6	312.2	309.7	326	320.5	312.4	298.2	347.6	354.6	321.5	293.4	308.3	318.6	327.1
ATP-citrate synthase	Q91V92	Acly	119.7	53	53.8955	91	1091	311.42	13718.9	13773.9	13822.3	14030.8	13516.7	13536.8	13457.1	13411.6	13717.8	13835.5	13931.1	13713.4	13608.4	13307.3	13563.6	13432.7
ATP-dependent (S)-NAD(P)H-hydrate dehydratase	Q9CZ42	Naxd	36.7	17	64.723	33	343	135.86	4154.9	4241.9	4181.4	4184.3	4172.8	4241	4117.5	4056.5	4211.7	4069.1	4169.9	4098.4	4049.6	4039	4067.1	4025.7
ATP-dependent 6-phosphofructokinase, liver type	P12382	Pfkl	85.3	37	54.2308	111	780	362.64	10395.1	10647.5	10650.5	10281.6	9863.1	9971.6	10073.7	10001.4	10216.1	9822.8	9007.9	9595.1	10027.3	10252.8	10181.5	9659.2
ATP-dependent 6-phosphofructokinase, muscle type	P47857	Pfkm	85.2	50	70.1282	164	780	570.34	20031.5	19582.1	20136.3	20006.5	19700.4	19648.8	19743.4	19726.6	19330	19844	19362.9	19062.1	19799.1	19716	19751.2	19244.2
ATP-dependent 6-phosphofructokinase, platelet type	Q9WUA3	Pfkp	85.4	50	68.8776	153	784	484.61	23665.6	23673.5	23607.4	23832.4	22845.5	22995.9	23094.2	22771.6	23083.4	23201.6	23026.5	22671.8	22899.4	23012.9	23282.9	22860.9
ATP-dependent Clp protease ATP-binding subunit clpX-like, mitochondrial	Q9JHS4	Clpx	69.2	6	11.1987	7	634	17.14	543.7	579	571.8	584.8	574.2	589.5	571.6	558.9	577	559.9	561	596.2	581.4	535.8	577.8	562.6
ATP-dependent Clp protease proteolytic subunit, mitochondrial	O88696	Clpp	29.8	8	37.1324	16	272	53.58	1942	2035.2	1938.9	1970.6	1950.9	1940.4	1927.6	1931.5	1842.5	1850.6	1858.4	1816.3	1842.7	1850.5	1912.9	1874.8
ATP-dependent DNA/RNA helicase DHX36	Q8VHK9	Dhx36	113.8	6	6.99301	10	1001	27.65	1178.2	1189.5	1115.6	1166.6	1124.2	1141.9	1161.6	1133.1	1131.5	1162.2	1135.2	1194.7	1118.7	1143.8	1151.7	1155.6
ATP-dependent RNA helicase A	O70133	Dhx9	149.4	46	41.3043	76	1380	259.62	8274.1	8588.6	8337.2	8583.9	8484.6	8429.5	8404.3	8365.2	8731.2	8980	9063.2	9201.7	8586	8512.1	8651.7	8549.2
ATP-dependent RNA helicase DDX1	Q91VR5	Ddx1	82.4	40	55.8108	68	740	192.08	8631.3	8813.7	8661.8	8646.1	8750.4	8711	8598.4	8743.3	8844	8792.9	8776.9	8810.6	8559.3	8507.9	8602.5	8471.2
ATP-dependent RNA helicase DDX19A	Q61655	Ddx19a	53.9	11	29.7071	18	478	48.79	1841.9	1881.1	1868.4	1871.1	1953.8	1989.2	1925.7	1978.8	1862.1	1923.5	1872	1970.5	1893.8	1949.3	1993	1946.1
ATP-dependent RNA helicase DDX39A	Q8VDW0	Ddx39a	49	12	31.1475	18	427	68.24
ATP-dependent RNA helicase DDX3X	Q62167	Ddx3x	73.1	37	58.3082	73	662	216.68	7799.8	7960.4	7879.2	7862.2	7753.3	7639.1	7849.4	7662.1	8275.9	8414.3	8316.5	8567.3	7771.8	7843.8	7919	7799.3
ATP-dependent RNA helicase DDX3Y	Q62095	Ddx3y	73.4	35	55.3191	66	658	182.17	679.5	639.5	673.8	704.6	694.5	689.2	683.7	695.9	713.3	746.4	731.5	749.5	662.4	672.9	653.7	670
ATP-dependent RNA helicase DDX42	Q810A7	Ddx42	101.9	10	14.9623	12	929	40.72	1493.6	1557	1519.3	1507.8	1518.5	1516.8	1483.3	1530.7	1527.4	1534.2	1551.9	1528	1488.7	1517.7	1547.9	1506.3
ATP-dependent RNA helicase DHX29	Q6PGC1	Dhx29	153.9	9	12.5275	11	1365	34.81	579.6	596	612.9	595.8	602.8	614.3	589.5	616.3	619.7	613.8	622.1	616.2	580.1	610.8	583.1	586.1
ATP-dependent RNA helicase DHX30	Q99PU8	Dhx30	136.6	12	12.0789	13	1217	29.95	926.6	933.8	957.9	947.3	927.5	938.9	927.6	913.2	950.2	874	970	970.9	929.5	844.5	896.9	923.8
ATP-dependent RNA helicase SUPV3L1, mitochondrial	Q80YD1	Supv3l1	87	6	9.7561	6	779	16.91	713.1	723.4	727.2	741.1	742.5	711.3	691	717.4	734.9	751.2	724.9	721	698.1	716.2	683.5	712.9
ATP-dependent translocase ABCB1	P21447	Abcb1a	140.6	13	12.6959	16	1276	39.74	1968.7	2182.8	1945.8	2000.9	1919.1	1788.4	1751	1745.2	2321.1	2135.7	2922	2239.7	2051.2	1889.7	1955.9	2044.1
ATP-dependent zinc metalloprotease YME1L1	O88967	Yme1l1	80	9	17.0629	12	715	34.28	918	948.1	910.9	921.6	922.9	938.6	906.7	932	903.5	980.2	911.7	986.2	891	926.4	921.9	905.1
ATP-sensitive inward rectifier potassium channel 10	Q9JM63	Kcnj10	42.4	7	24.5383	14	379	34.1	1772.8	1811.1	1730.7	1773.3	1784.7	1709.7	1784.9	1710.9	1722.8	1827.5	1862.6	1770.9	1789.3	1824.1	1781.9	1741.4
AT-rich interactive domain-containing protein 1A	A2BH40	Arid1a	241.9	2	1.35786	2	2283	7.63	53.9	47.8	38.8	50	50.5	55.5	52.1	57.9	50.5	48.2	52.5	54	48.1	50	37.9	47.2
AT-rich interactive domain-containing protein 1B	E9Q4N7	Arid1b	237.6	3	1.6934	3	2244	4.01	114.3	112.6	107.8	117.5	115.9	108	113.9	108.4	109.8	109.5	107.9	120.4	102	100.7	117.9	101.2
Attractin	Q9WU60	Atrn	158	2	3.22129	4	1428	0	9.6	8.5	13.5	10.2	12.4	10.6	15.7	12.4	12.1	14.9	15.2	12.2	16.8	14.8	15.1	11
Atypical kinase COQ8A, mitochondrial	Q60936	Coq8a	71.7	11	24.031	15	645	52.1	1489.5	1495.1	1510.6	1524.1	1461.1	1439.3	1440.7	1436.9	1483.9	1349.9	1399.6	1368.6	1389.7	1393.3	1399.5	1281
Autophagy protein 5	Q99J83	Atg5	32.4	3	17.0909	3	275	12.9	326.4	316.2	309.8	315.6	344.2	341.1	342	343.1	331.3	324.4	299.8	336.2	320.9	309.1	332.9	324.3
Autophagy-related protein 16-1	Q8C0J2	Atg16l1	68.1	4	7.90774	6	607	13.62	404.4	395.7	403	401.6	418.8	404.3	403.5	419	424.3	411.6	398.9	408.2	390.9	399.9	392.4	381.6
Autophagy-related protein 2 homolog B	Q80XK6	Atg2b	231.3	8	5.3494	10	2075	18.88	373.4	401.8	401.8	386.6	375.5	417.8	398.6	368.9	380.5	378.2	387.8	385.2	369.4	389.6	369.3	354
Axin interactor, dorsalization-associated protein	Q8C4Q6	Aida	34.9	6	23.6066	6	305	20.09	903.4	895.8	916.4	974.8	933.2	932.9	900.1	882.9	878	922.4	981.8	904.5	918.5	873.9	925.4	880.8
Baculoviral IAP repeat-containing protein 6	O88738	Birc6	531.8	19	6.47276	22	4882	65.05	2207.7	2268.5	2347.4	2283.8	2184.4	2236	2257	2204.8	2318.9	2372.1	2312.7	2450.7	2219.3	2334.7	2253.1	2262.3
BAG family molecular chaperone regulator 1	Q60739	Bag1	39.7	2	7.04225	3	355	8.7	269.9	249.4	247.2	248.7	250.8	236.4	257.2	239.7	271.5	271.6	261.8	261.8	264.2	234.7	221.7	242.6
BAG family molecular chaperone regulator 2	Q91YN9	Bag2	23.5	2	8.09524	2	210	3.24	233.4	240.6	238.6	233.7	223.7	234.6	227.9	218.7	221.6	218.7	227.6	227	221.7	224.7	227.9	220.8
BAG family molecular chaperone regulator 3	Q9JLV1	Bag3	61.8	2	3.4662	2	577	5.43	92	93.4	91.4	95.5	83	83.7	89.8	91.8	78.3	89	94	92.8	85.7	81.8	84.4	86.4
BAG family molecular chaperone regulator 4	Q8CI61	Bag4	49.1	3	4.814	4	457	10.95	202	240.4	210.2	215.1	207.7	221.4	221	227.9	214.3	188.7	215.7	205.5	220.7	200.9	192.5	183.9
BAG family molecular chaperone regulator 5	Q8CI32	Bag5	50.9	12	39.5973	18	447	53.97	1742.9	1735.8	1804.1	1823.4	1706	1744.2	1735.8	1772	1758.9	1798.3	1677	1734.1	1681.4	1737.7	1658.1	1715.5
Band 3 anion transport protein	P04919	Slc4a1	103.1	10	14.4241	13	929	28.89	1407.6	1651.4	1489.4	1483.9	1448.1	1297.8	1273.4	1430.4	1594.1	1505.4	1886.2	1623.8	1404.8	1431.1	1413.6	1414.2
Band 4.1-like protein 1	Q9Z2H5	Epb41l1	98.3	53	58.1342	115	879	354.33	17053.5	16951.9	16982.4	17151.6	17342	17585.9	17034.8	17127.1	17130.3	17402	17582.5	17135.2	17241	17102.9	16871.3	16602.6
Band 4.1-like protein 2	O70318	Epb41l2	109.9	52	50	100	988	328.39	14057.5	13879	14166.2	14378.7	14335.3	14567.2	13804.9	14325.4	12958.8	13531.9	13370.2	13248.5	13764.8	13709.9	14080.5	14091.3
Band 4.1-like protein 3	Q9WV92	Epb41l3	103.3	63	65.5544	145	929	450.74	22932.1	22533.3	22746.5	23715.3	22041.5	22430.3	22717.6	22671.3	20445.5	21234	20761.5	20135.1	22602.7	22677.9	22627	23247.9
Barrier-to-autointegration factor	O54962	Banf1	10.1	4	57.3034	8	89	29.39	1305.4	1441.8	1269.8	1262.3	1208.3	1295.5	1258.5	1308.5	1132.2	1214.4	1172.9	1302.4	1124.8	1383.5	1232	1147
Basal cell adhesion molecule	Q9R069	Bcam	67.6	5	12.3794	5	622	21.19	237.8	244.7	227.5	213	196.3	177.8	162.4	177.7	171.2	157.6	198	174.8	181.8	167	217.8	205.2
Basement membrane-specific heparan sulfate proteoglycan core protein	Q05793	Hspg2	398	42	15.2684	50	3707	150.69	5748.8	6414	5752.1	5724.8	5637.5	5275.6	4947.2	5229.8	5252.9	5144.3	5721	5290.6	5314.1	5139.8	5804.2	5840.5
Basic leucine zipper and W2 domain-containing protein 1	Q9CQC6	Bzw1	48	15	35.0835	28	419	48.18	2719.6	2801	2670.8	2693.4	2743.5	2642.2	2723	2765.7	2829.3	2836.8	2956.2	2970.5	2692.2	2836	2842.3	2844.9
Basic leucine zipper and W2 domain-containing protein 2	Q91VK1	Bzw2	48	4	10.2625	5	419	10.74	547.3	587.4	573.7	551.5	576.5	582.9	577	579.6	580.7	588.1	531.3	588.6	567	576.6	575.5	570.4
Basigin	P18572	Bsg	42.4	9	21.0797	25	389	74.25	3182.2	3300.3	3409.6	3250.4	3434.1	3677.6	3563.3	3510.7	3767.6	3489.6	3341	3822.5	3389	3370.6	3357.1	3297.1
B-cell CLL/lymphoma 7 protein family member A	Q9CXE2	Bcl7a	22.8	3	12.381	4	210	7.27	561.4	569	566.9	553.2	590.8	587.8	558.2	572.9	613.5	600.4	653.4	634.7	606.1	556.4	590.8	591.1
B-cell lymphoma/leukemia 11A	Q9QYE3	Bcl11a	83.8	2	5.95084	2	773	9.13	35.2	36.3	38.8	47.4	36.5	40.3	40.6	41.4	34.4	44	43.6	37.8	40.8	45.3	39.6	41.4
B-cell lymphoma/leukemia 11B	Q99PV8	Bcl11b	94.5	5	8.48416	5	884	11.28	196.7	205.9	219.4	214.3	216.8	219.6	201.1	213.8	213.2	206.6	208.2	231.2	206.9	231.6	201.8	210.5
B-cell receptor-associated protein 29	Q61334	Bcap29	27.9	5	15.8333	5	240	10.06	493.7	471.5	458.7	493	481.8	489.5	460.9	477.8	437	475.8	460.4	478.2	471.7	501.5	523.2	511.4
B-cell receptor-associated protein 31	Q61335	Bcap31	27.9	6	18.3673	8	245	23.21	2014.5	2073.1	2002.6	2067.5	1953.8	1967.2	1981.2	1918.9	2173.7	2142.6	2118.4	2145.2	1994.5	2022.9	2083.1	2085.7
BCL2/adenovirus E1B 19 kDa protein-interacting protein 3	O55003	Bnip3	21	3	16.0428	5	187	11.69	290.2	297	289.7	272.7	294.4	287.5	291.1	304.3	267.4	281.2	268.1	287	278.4	285	280.9	278.5
Bcl2-associated agonist of cell death	Q61337	Bad	22.1	2	18.1373	2	204	2.84	162.7	174.5	219.9	165.3	194.6	185.7	150.9	217	184.9	185.6	139	189	176.7	195.9	183.7	174.8
Bcl-2-associated transcription factor 1	Q8K019	Bclaf1	105.9	21	22.6333	30	919	61.11	4711.5	4797.6	4747.9	4740.8	4967.4	5022.2	4683.4	4791.5	4850.6	4874.7	5114.6	5016.5	4810.6	4698	4771.3	5023.4
Bcl-2-like protein 1	Q64373	Bcl2l1	26.1	3	18.8841	5	233	16.22	516.6	521.7	570.6	513.3	537.2	532.2	517.7	542.8	510.1	494.9	523.7	518.6	504.6	497.5	530.8	523.2
Bcl-2-like protein 13	P59017	Bcl2l13	46.7	9	31.106	15	434	58.84	2019.7	2048.3	1976.4	1978.4	2029.5	2075.2	2073.3	2005.8	2192.6	2273.8	2165.6	2268.9	2029.7	2050.4	2048.7	1948.4
Bcl-2-like protein 2	P70345	Bcl2l2	20.8	2	9.84456	3	193	8.49	425	424.3	430.5	446.5	443.5	411	429	422.8	472.8	433.5	439.9	456.4	424.1	426.7	413.7	425.4
BDNF/NT-3 growth factors receptor	P15209	Ntrk2	92.1	21	36.9062	36	821	109.44	3930.3	3905.4	3911.2	3936.1	3968.3	4041.2	3984.3	3983.4	4002.7	4215.9	4164.9	4121.1	3952.2	3858.7	3916.4	3775.5
Beclin-1	O88597	Becn1	51.6	6	19.6429	7	448	27.29	1113.2	1208	1212.5	1180.4	1158.5	1153.1	1190.6	1145.5	1133.6	1147.4	1188.4	1158.4	1149.6	1121.6	1159.3	1159.9
Beta-1,3-glucosyltransferase	Q8BHT6	B3glct	55.3	3	6.95297	3	489	8.14	526.5	598.9	520.6	533.2	519.7	517.3	505.2	500.9	544.2	513.9	584.2	564.1	475.1	489.1	498.3	484.5
Beta-1,4 N-acetylgalactosaminyltransferase 1	Q09200	B4galnt1	59.2	2	7.31707	4	533	14.83	393.1	369.2	409.6	428	361.6	414.9	444.8	426.3	338.1	301.8	263.6	290.8	391.3	410	423.1	412.7
Beta-2-glycoprotein 1	Q01339	Apoh	38.6	2	6.66667	4	345	9.13	335.3	401.3	359.2	351.9	359.2	354.5	329.7	340.1	393.5	318.8	452.1	364.3	349.2	327.6	348.2	356.2
Beta-2-syntrophin	Q61235	Sntb2	56.3	3	5.38462	6	520	2.45	74.4	97.7	79.1	84	76.1	71.9	73.8	70.7	68.6	65.7	62.4	68.4	66.6	69.7	70.4	71.4
Beta-actin-like protein 2	Q8BFZ3	Actbl2	42	16	32.4468	254	376	689.86	7.8	9.6	9.6	9.2	11.9	12.9	12.6	15	12.6	11.9	12.6	12.8	16	12.2	14.8	11.4
Beta-adducin	Q9QYB8	Add2	80.6	41	69.5172	109	725	366.26	15669.2	15410.9	15532.7	15431	15598	15655.3	15857.4	15559	15784.9	15443.9	15515	15152.4	16102.8	15852.7	15669.4	15547.6
Beta-adrenergic receptor kinase 1	Q99MK8	Grk2	79.6	23	38.3164	31	689	98.58	3800	3818.6	3908.1	3868.7	3930.5	3795.6	3793.5	3811.5	3975.6	3986.4	4006.2	4017.7	3739.9	3758.6	3747.1	3838.8
Beta-adrenergic receptor kinase 2	Q3UYH7	Adrbk2	79.6	14	25.5814	16	688	45.96	340.1	372.7	351.4	385.2	388.1	373.8	393.1	374.6	353.1	365.7	390.8	315.8	332.1	326.2	321.1	334.6
Beta-arrestin-1	Q8BWG8	Arrb1	46.9	14	50.9569	24	418	77.53	2489.6	2497.9	2427.3	2503.7	2498	2514.3	2478.4	2517.2	2314.6	2469.9	2489	2408.7	2444	2453.2	2429	2529.1
Beta-arrestin-2	Q91YI4	Arrb2	46.3	3	6.82927	4	410	6.37	139.7	145.8	144	142.3	142.6	133.4	145.5	143.3	145.3	137.1	147.5	142.6	152.2	146.5	142.5	139.3
Beta-catenin-like protein 1	Q9CWL8	Ctnnbl1	64.9	3	7.1048	3	563	9.25	350.7	361.2	365.7	378.3	360.5	339.5	366.7	350.3	379.2	387.7	392.9	389.5	358.8	346	350	332.7
Beta-centractin	Q8R5C5	Actr1b	42.3	18	65.6915	41	376	132.53	1451.9	1442.3	1450.4	1516.8	1364.2	1390.8	1393.7	1398.7	1436.5	1447.6	1530.9	1439.3	1442.4	1411.4	1375.8	1394.3
Beta-enolase	P21550	Eno3	47	9	23.5023	161	434	447.15	89.5	73.8	90.9	77.1	84.8	106.6	88.2	96.8	98.1	60.8	89	81.9	106	77.8	81.5	83.2
Beta-galactosidase	P23780	Glb1	73.1	3	4.48223	3	647	6.97
Beta-hexosaminidase subunit alpha	P29416	Hexa	60.6	7	13.0682	7	528	13.78	463.2	444	449	441.2	447.7	448.1	438.1	437.6	444.3	457	437.1	450.3	460.1	426.6	458	441.1
Beta-hexosaminidase subunit beta	P20060	Hexb	61.1	17	39.7388	26	536	69.04	3389.4	3496.9	3496.9	3423.5	3406.9	3373.7	3355.4	3327.6	3472.7	3471.8	3671.6	3675.4	3775.5	3412.1	3831.6	3410
Beta-soluble NSF attachment protein	P28663	Napb	33.5	33	92.953	127	298	431.68	18843.7	18127	18805.6	18064.9	17965.9	17689.5	18165	18196.4	18438.7	17740.1	18310.8	17298	19091.5	18560.1	18236.8	18254.4
Beta-synuclein	Q91ZZ3	Sncb	14	8	54.1353	45	133	197.15	6052.3	5584.7	5674.2	5781.5	6131.5	6335.3	5782.3	6079.8	5189.8	5384.6	6383.9	5014.4	6433.5	5871.4	5957.9	6284
BH3-interacting domain death agonist	P70444	Bid	21.9	3	31.2821	3	195	15.57	199.5	207.7	210.3	187.8	218.1	202.3	215.8	205.1	208	205.3	192.6	200.8	206.7	191	203.5	199.1
Bifunctional 3'-phosphoadenosine 5'-phosphosulfate synthase 1	Q60967	Papss1	70.7	15	30.1282	23	624	56.62	2905.4	3015.8	2920.2	2976.7	2983.1	2975.3	2942.9	3041.8	3136.8	3102.8	3116.9	3300.9	2918.1	2955.9	2934	2973.6
Bifunctional 3'-phosphoadenosine 5'-phosphosulfate synthase 2	O88428	Papss2	70.3	2	3.86473	2	621	6.71
Bifunctional coenzyme A synthase	Q9DBL7	Coasy	62	11	29.8401	15	563	46.07	999.2	1025.8	966.6	1023	999.9	955.2	946.3	963	1057.8	1086.5	1041.4	1103.7	970.9	977.8	981.6	981.3
Bifunctional epoxide hydrolase 2	P34914	Ephx2	62.5	15	49.278	33	554	109.6	2865.7	2813	2963.2	2845.6	2763.2	2724.9	2758.7	2792.2	2715	2783.1	2747.1	2627.2	2686.1	2652.7	2646	2661.3
Bifunctional glutamate/proline--tRNA ligase	Q8CGC7	Eprs	170	63	47.4206	104	1512	308.06	13944.6	14187.5	13943.6	13958.9	14158.7	14089.9	14059.7	13977.3	15367.5	15316.1	15238.4	15829.5	14037.8	13967.4	14124	13916.5
Bifunctional purine biosynthesis protein PURH	Q9CWJ9	Atic	64.2	29	67.2297	49	592	166.6	5127.8	5149.7	5220.7	5174.2	5062.4	5065.5	5068.8	5059.9	4963.2	5033	5193	4976.3	5060.2	4984	5122.7	5115.8
Biglycan	P28653	Bgn	41.6	2	9.48509	2	369	6.71	106.4	137.6	109.4	108.8	110.4	84.1	82.5	80.8	84.1	88.7	149.4	93.3	99.9	81.8	102.5	104.2
Biliverdin reductase A	Q9CY64	Blvra	33.5	12	43.7288	19	295	59.2	2413.8	2459.7	2350.5	2454.8	2375.2	2370	2341.9	2379.3	2272.5	2362.3	2385.9	2231.3	2363	2351.3	2441.9	2419.7
Biogenesis of lysosome-related organelles complex 1 subunit 1	O55102	Bloc1s1	14.3	3	31.2	4	125	10.33	578.2	580.9	597.9	574	598.1	576.3	552.4	564.3	647.5	620.3	696.9	614.6	595.6	587.1	529.3	566.3
Biorientation of chromosomes in cell division protein 1	Q5SQY2	Bod1	18.4	2	13.2948	2	173	4.58	193.8	193.1	198.9	206.1	195.1	192.6	182.6	192.7	202	200.8	223.7	204	200	183.4	189	203.5
Bis(5'-nucleosyl)-tetraphosphatase [asymmetrical]	P56380	Nudt2	17	9	61.2245	12	147	35.37	914.7	913.8	917.2	934	885.7	856.8	875.4	883	874.9	912.2	897.5	835.6	911.5	866.6	927.3	949.9
Bisphosphoglycerate mutase	P15327	Bpgm	30	7	31.2741	9	259	30.17	1552.5	1644	1572	1555.6	1622.5	1565.9	1555.1	1538.4	1714	1644.1	1764.4	1722.6	1592.2	1587.7	1578.5	1616.2
Bleomycin hydrolase	Q8R016	Blmh	52.5	20	46.3736	42	455	136.34	5604.8	5798	5681.6	5772.6	5484.4	5381.6	5447.8	5521.1	5818.7	5980.5	5981.9	5962.9	5571.8	5585.4	5607.1	5618.2
BLOC-1-related complex subunit 5	Q9D920	Borcs5	22.1	2	12.8205	3	195	7.32	95.7	96.4	105.6	92	105.6	101.4	93.8	95.6	111	103.7	105.5	115.4	98.2	90	96.6	95.4
bMERB domain-containing protein 1	Q8R1Y2	Bmerb1	23.4	5	24.6305	5	203	10.98	533.7	565.8	614.8	607.6	542.5	587.6	525.8	596.1	568.4	547.8	555.5	559.4	506.9	534.8	519.1	550.6
BMP/retinoic acid-inducible neural-specific protein 1	Q920P3	Brinp1	88.6	10	20.3947	12	760	34.46	1516.5	1550.8	1511.6	1518.1	1493.8	1481.1	1507.3	1499.4	1558.7	1625.1	1575.9	1649.4	1443.9	1517.8	1497.5	1478.6
BMP/retinoic acid-inducible neural-specific protein 2	Q6DFY8	Brinp2	89.2	4	6.25798	4	783	10.29	98.1	119.4	113.5	118.8	95.6	94.1	93.8	101.6	100.5	107.8	98.9	119.7	97.7	98.4	96.9	106.4
BolA-like protein 1	Q9D8S9	Bola1	14.4	8	74.4526	10	137	39.06	968.3	1037.5	980.1	1006.6	1081.2	1087.2	1048.1	1052.2	996.2	998.9	1029.3	991.6	1061.5	1048.1	1006.5	1042.8
BolA-like protein 2	Q8BGS2	Bola2	10.2	5	65.1163	8	86	29.2	1289.4	1246.9	1274.2	1265.3	1358.5	1350.5	1404.8	1368.8	1385.1	1363.4	1408.8	1423.1	1390.8	1379.3	1379.9	1447.8
BolA-like protein 3	Q8CEI1	Bola3	12.2	5	48.1818	5	110	9.2	436.5	484.3	461.3	478.5	478.2	492.2	446.4	491	502.1	501.6	584.2	559.9	476	428.9	472.1	477.1
Bone morphogenetic protein receptor type-2	O35607	Bmpr2	114.9	10	11.8497	13	1038	29.3	832.2	806.3	789.1	819.4	791.8	739	761.2	753.2	802.9	806.3	870	787.1	760	727.3	727	714.2
Brain acid soluble protein 1	Q91XV3	Basp1	22.1	37	95.5752	179	226	597.51	33395.8	32453.5	32561.6	31583.6	33594.4	33701.9	33100.9	34194	30813.5	33007.6	30553	31330	30906.9	31519.1	32204.6	31052.5
Brain-enriched guanylate kinase-associated protein	Q68EF6	Begain	65.3	20	47.3333	20	600	62.99	1939.4	1916.2	1933.9	2047.3	1893.5	1900	1920.5	1831.4	1938.7	1837.9	1856.7	1889.5	1908.3	1902.9	1836	1845
Brain-specific angiogenesis inhibitor 1-associated protein 2	Q8BKX1	Baiap2	59.2	42	80.7477	95	535	295.93	15119.9	15068.4	14771.5	14404.4	14726.7	14605.9	14811.8	14581	15297	15268.7	14585.8	15424.7	14426.3	14814.6	14625.2	14250.2
Branched-chain-amino-acid aminotransferase, mitochondrial	O35855	Bcat2	44.1	9	30.7888	12	393	33.76	952.1	1054.1	992.3	975.5	980.8	961.2	950.5	944.4	952.1	954.5	1062.4	961.7	935.9	941.6	986	954.1
BRCA1-associated protein	Q99MP8	Brap	66.9	4	8.29103	4	591	9.52	82.5	84.3	78.1	87.1	78.3	78.7	82.5	81.5	99.7	91.8	90	79.9	91.8	93.2	72.5	85.8
Breakpoint cluster region protein	Q6PAJ1	Bcr	143	21	22.6772	27	1270	87.82	2047	2009.1	2122.3	2103.1	2149	2167.5	2147	2100.5	2097	2106.3	2088.6	2119	2101.3	2115.9	2076.8	2078.5
Breast cancer anti-estrogen resistance protein 1	Q61140	Bcar1	94.2	6	8.92449	8	874	28.55	972.6	982.4	958.2	906.8	969.2	949.1	965	966.4	939.6	944.5	866.6	1002.3	907.5	965.7	992.1	936.9
Breast carcinoma-amplified sequence 1 homolog	Q80YN3	Bcas1	67.3	25	38.8626	54	633	160.88	10715	10500.6	11273.5	11604.7	10736.3	12142.1	12591	12326.4	13813.7	12935.9	10411.6	14505.1	12151.2	12420.8	12342.6	13389.4
Breast carcinoma-amplified sequence 3 homolog	Q8CCN5	Bcas3	101	14	19.5043	19	928	58.55	3196.4	3065.1	3102.1	3129.7	3148.9	3168.7	3128.1	3079.6	2981.7	3031.4	3097.8	3046.6	3127	3127.4	3135.4	3092.5
Brefeldin A-inhibited guanine nucleotide-exchange protein 1	G3X9K3	Arfgef1	208.4	17	10.2384	22	1846	64.3	932	985.1	988	1005.8	950.9	938.3	951.9	915	1026.5	1022	1030.3	1002.5	944.7	893.6	959.5	921.4
Brefeldin A-inhibited guanine nucleotide-exchange protein 2	A2A5R2	Arfgef2	202.1	34	22.9353	47	1792	134.29	4666	4725.9	4696.5	4788.2	4696.5	4625.5	4709.7	4573.7	4802.9	4670.2	4687.3	4711.5	4662.4	4696.9	4748.3	4677.4
Brefeldin A-inhibited guanine nucleotide-exchange protein 3	Q3UGY8	Arfgef3	239.9	21	14.5622	26	2170	86.92	1365.4	1389.3	1333.4	1372.5	1323.3	1287.2	1288.5	1301.3	1296.9	1389.8	1325.6	1383.1	1256.6	1341.8	1311.5	1325.1
Brevican core protein	Q61361	Bcan	95.8	34	44.8471	77	883	262.39	10657	10402.5	10386.3	10319.9	10394.9	10317.8	10388.7	10314.3	9079.8	9223.1	8869.4	8991.5	10012.1	10147	10039.1	10034.2
BRI3-binding protein	Q8BXV2	Bri3bp	28.2	3	13.834	4	253	13.36	606.7	632	595.4	630.8	598	597.1	600.9	606.4	647.7	642.5	602.8	658.4	587.9	575.6	603.2	591.6
Bridging integrator 2	D3Z6Q9	Bin2	52.5	3	5.11247	5	489	11.5	94.6	93.4	90.9	98	98.6	84.7	97	97.2	95.5	93.9	90	100.1	98.6	86.4	91.6	86.2
BRISC and BRCA1-A complex member 1	Q3UI43	Babam1	36.8	5	23.7237	6	333	20.22	827	764.4	815.1	815.5	810.8	837.7	798.4	786.9	776.8	779	833.1	801.6	798.5	790.9	798.4	792.4
BRISC and BRCA1-A complex member 2	Q8K3W0	Babam2	43.5	6	21.4099	8	383	20.33	415.9	427.3	404.3	430.6	446.6	470.8	462.4	442.1	459.1	430	469.4	435.2	436.8	440.9	421.3	410.7
BRISC complex subunit Abraxas 2	Q3TCJ1	Abraxas2	46.9	4	9.87952	6	415	17.17	411.7	406.4	422.1	406.1	442.3	450.7	450.7	448.4	411.1	413.4	399.2	406.8	421.2	420.4	408.8	413.2
BRO1 domain-containing protein BROX	Q8K2Q7	Brox	46.2	10	32.6034	17	411	49.7	837.9	883.9	906.6	879.8	877.9	845.9	885.9	865.3	884.8	872.4	855.2	902.7	862.4	862.3	870.9	904.5
Bromodomain-containing protein 4	Q9ESU6	Brd4	155.8	2	1.21429	2	1400	5.1	384.2	354.8	361.3	344.8	391	343.9	351	358.9	349	346.3	361.1	352.2	355.4	358.2	281.5	297.1
BSD domain-containing protein 1	Q80Y55	Bsdc1	46.9	5	19.9063	6	427	17.46	502.4	489.6	476.6	478.2	467.5	469.2	481.5	471.8	468	476.7	490.6	485.9	467.8	474.5	477.5	477.9
BTB/POZ domain-containing protein 17	Q9DB72	Btbd17	52.6	13	40.795	15	478	57.44	1626.4	1630.6	1617	1669	1626	1680	1659.2	1674.1	1597.1	1594.5	1695.9	1606.1	1564.6	1586.1	1622.9	1595.2
BTB/POZ domain-containing protein KCTD12	Q6WVG3	Kctd12	35.9	13	50.4587	28	327	97.54	1897.2	1921.3	1870.5	1774.9	1895.9	1842	1894.8	1864.7	1824.9	1782	1770.3	1841.4	1892.1	1932.2	1867.7	1854.5
BTB/POZ domain-containing protein KCTD16	Q5DTY9	Kctd16	48.9	22	42.1546	28	427	78.86	4790.9	4749.6	4672	4621.8	4577.8	4601	4645	4659.1	4595	4662.4	4815.2	4599	4547.2	4548.3	4527.5	4400.8
BTB/POZ domain-containing protein KCTD21	Q3URF8	Kctd21	29.6	2	11.9231	2	260	5.22	175.5	184.6	179	176.9	176.6	170.2	185.2	187.7	179.7	172.5	176	165.6	178.9	176.2	156.6	156.5
BTB/POZ domain-containing protein KCTD4	Q9D7X1	Kctd4	30	9	47.1042	11	259	34.88	413.7	388.6	406.6	390.9	403.1	384.7	388	409.3	380.3	377.2	342.3	367.5	375.5	419.6	402.8	389.2
BTB/POZ domain-containing protein KCTD5	Q8VC57	Kctd5	26.1	3	20.0855	4	234	3.79
BTB/POZ domain-containing protein KCTD8	Q50H33	Kctd8	52.7	4	9.45378	6	476	14.03	344.5	335.8	350.3	354.7	367.9	344.7	359.1	368.4	329.7	391.5	358	355	338.1	311	339.6	329
BUB3-interacting and GLEBS motif-containing protein ZNF207	Q9JMD0	Znf207	52.8	6	12.3232	6	495	17.72	1135.2	1211.6	1103.9	1154	1163.5	1191.6	1174.5	1144.7	1215.2	1242.7	1237.9	1285.7	1131.5	1168.9	1159.1	1136.3
C-1-tetrahydrofolate synthase, cytoplasmic	Q922D8	Mthfd1	101.1	45	61.2834	69	935	212.23	8308.3	8279.7	8390.5	8461.7	8399.3	8279.9	8338.8	8286.6	8369.1	8370.2	8162.1	8433.4	8095.8	8125.1	8360.1	8327.1
C2 calcium-dependent domain-containing protein 4C	Q5HZI2	C2cd4cC2CD4 family	44.6	5	16.9451	6	419	21.18	575.2	563	599.8	600.7	532.5	570.7	535.2	544	503.7	554.7	610.1	527.2	539	515.8	558.7	551.3
C2 domain-containing protein 5	Q7TPS5	C2cd5	111.6	8	9.54724	13	1016	41.03	1117	1109.7	1082.6	1098.1	1056	1031.3	1061.2	1044.8	1024.8	1069.9	1051.5	1052.8	1062.5	1066.5	1062.6	1063
CAAX prenyl protease 1 homolog	Q80W54	Zmpste24	54.7	5	16.8421	5	475	16.25	262.9	281.6	270.9	257.6	247.7	233.1	276.6	239.4	290.3	281.6	258.5	296.9	254.1	251.5	257.2	240.6
CAD protein	B2RQC6	Cad	243.1	3	2.74157	4	2225	5.37	263.7	262.4	268	264.7	258.8	238.8	235	249.7	266.2	253.8	273.3	264.5	260.6	251.3	238	247.6
Cadherin EGF LAG seven-pass G-type receptor 2	Q9R0M0	Celsr2	316.8	4	2.4666	5	2919	15.3	330.6	342.3	368.7	346.3	359.5	341.4	367.9	341.1	370.7	374.2	353.3	376.8	350.8	346.5	370.1	345.4
Cadherin-10	P70408	Cdh10	88.3	9	15.3553	10	788	24.43	1155.2	1180.3	1242.7	1258	1156.4	1192.1	1173.7	1127	1286.5	1186.1	1217	1189.4	1113.8	1083.8	1096.6	1114.1
Cadherin-11	P55288	Cdh11	88.1	13	25	17	796	56.68	1548.9	1578.6	1612.5	1581.6	1614.2	1516.9	1658.7	1623.7	1617.6	1664	1578.3	1716.2	1512.5	1517.8	1533.1	1547
Cadherin-12	Q5RJH3	Cdh12	88.4	2	4.03023	2	794	4.26
Cadherin-13	Q9WTR5	Cdh13	78.1	12	23.1092	20	714	74.5	2829.7	2765	2775.4	3052.2	2920.3	3027	2675.9	2870.6	2944.2	3106.2	3431.6	3013.6	2852	2640.5	2760	2718.3
Cadherin-2	P15116	Cdh2	99.7	19	29.9117	33	906	120.06	3988.1	4025.9	3961	3905.4	3910.5	3910.8	3829	3873.4	3883.2	4088.7	3967.6	4002.8	3757.3	3858.9	3814.2	3833.9
Cadherin-20	Q9Z0M3	Cdh20	88.9	2	2.87141	2	801	0	307.3	318.9	294.7	296	299.9	318.3	288.8	315.7	314.4	324.1	356.9	330.2	303	327.6	311.8	295.4
Cadherin-8	P97291	Cdh8	88.2	4	6.63329	6	799	2.09	94	92.7	81.4	88.1	84.4	86.6	101.8	92.6	99.5	105.2	116.4	105.5	86.8	92.6	96	88.9
Cadherin-9	P70407	Cdh9	88.2	3	6.48855	4	786	14.34	316.4	291.8	318.2	313.4	304.4	288.8	316.9	299.3	331	315.6	292.3	346.8	288.5	315.7	300.4	302
Calbindin	P12658	Calb1	30	20	77.3946	44	261	130.56	6712.6	6887.8	6227.3	6726.5	6385.6	6244.3	6155.5	6082.7	6408.2	6546.9	7701.9	6247.1	6683.7	6454.4	6501.7	6852.5
Calcineurin B homologous protein 1	P61022	Chp1	22.4	7	49.2308	10	195	38.37	1328.8	1356	1367.9	1348.1	1332	1297.8	1329.7	1368.3	1278.3	1331.5	1337.2	1311.1	1336.6	1358	1350.7	1411.6
Calcineurin B homologous protein 3	Q9JKL5	Tesc	24.6	5	28.5047	5	214	19.14	698.5	717.1	689.6	707.9	698.7	656.6	653.3	691.2	692.6	673.8	697	701.6	654.4	664	681	675.1
Calcineurin subunit B type 1	Q63810	Ppp3r1	19.3	16	74.7059	118	170	423.67	16690.8	15826.8	16586.1	14861.1	15352.6	15226.7	15934.8	15438.5	16502	15772.8	15034.9	16082.8	16735.5	15643	14591.8	16309.6
Calcipressin-1	Q9JHG6	Rcan1	28.1	5	23.9044	6	251	14.85	873.3	891.6	947.2	900.1	889	841.6	907.7	868.5	893	877	851.7	885.3	866.6	892.2	895.7	884.6
Calcium homeostasis endoplasmic reticulum protein	Q8CGZ0	Cherp	106.1	5	7.26496	6	936	13.12	650.7	653.1	646.5	675.4	685	676	664.4	641.4	680.6	703.5	699.3	715.8	666.8	663.2	645.4	678.3
Calcium load-activated calcium channel	Q921L3	Tmco1	21.2	4	21.8085	5	188	8	729.4	739.4	745.7	782.7	783.7	775.9	773.4	781.6	818.6	834.8	794.9	869.6	750.8	803.4	787.4	760.5
Calcium signal-modulating cyclophilin ligand	P49070	Camlg	32.5	7	31.6327	9	294	22.9	882.8	886.9	880.6	900.6	887	903.5	899.4	894.9	882	873.8	850.3	936.1	832.8	879.8	852.2	858
Calcium uniporter protein, mitochondrial	Q3UMR5	Mcu	39.7	19	47.7143	33	350	117.49	5050.6	5189.5	5048.1	5019.9	4937.3	4695.2	4878.2	4833.2	4983.3	4983.2	4974.7	4805.9	4868.6	5034.4	4905	4694.7
Calcium uptake protein 1, mitochondrial	Q8VCX5	Micu1	54.3	21	42.348	33	477	55.16	4093.8	4027.4	4063	3949.3	4064.9	4023.2	4082	4064.6	3980	3902.6	3827.8	3959.6	3894.6	4082.4	3987.8	3984.2
Calcium uptake protein 3, mitochondrial	Q9CTY5	Micu3	59.8	18	37.8585	23	523	68.68	2789.3	2825.6	2781.4	2772.6	2796.3	2713.6	2741.3	2719	2816	2822.5	2698.3	2784.2	2686.9	2825.9	2763.8	2697.7
Calcium/calmodulin-dependent 3',5'-cyclic nucleotide phosphodiesterase 1A	Q61481	Pde1a	64.5	21	41.4159	31	565	102.55	4111.8	3987.3	4018	3944.4	4024.7	3983.4	4015.3	3958.2	3805.1	3991.7	4051.8	3772.1	4013.8	4018	4157	4210.8
Calcium/calmodulin-dependent 3',5'-cyclic nucleotide phosphodiesterase 1B	Q01065	Pde1b	61.2	19	41.8692	24	535	73.99	2710.7	2639.9	2622.4	2729.5	2692.8	2623.1	2686.7	2554.2	2544.3	2618.4	2753.7	2529.3	2757.9	2710.3	2713.1	2728.5
Calcium/calmodulin-dependent protein kinase II inhibitor 1	Q6QWF9	Camk2n1	8.5	3	56.4103	5	78	19.14	731	722.5	761.2	768.6	768.9	766	704.3	708.6	711.7	819.6	958.4	745.7	735	695.1	744.3	821.2
Calcium/calmodulin-dependent protein kinase kinase 1	Q8VBY2	Camkk1	55.8	20	47.1287	24	505	84.05	3705	3729.6	3701.6	3669.1	3452	3465.5	3521.1	3494.6	3554.4	3392.4	3183.7	3436.7	3452.4	3538	3441.5	3483.1
Calcium/calmodulin-dependent protein kinase kinase 2	Q8C078	Camkk2	64.6	19	37.9252	25	588	69.46	2761.8	2784.4	2705	2714.3	2638.6	2652.6	2666	2688.7	2857.4	2923.3	2838.5	3097.6	2649.8	2619.3	2599.2	2576.3
Calcium/calmodulin-dependent protein kinase type 1	Q91YS8	Camk1	41.6	6	21.3904	14	374	43.54	301.2	318.6	324.8	335.7	289.6	279.4	283.4	277.1	279.5	322.5	369	290.4	295.5	278.2	298.2	315.4
Calcium/calmodulin-dependent protein kinase type 1B	Q9QYK9	Pnck	38.5	4	16.3265	4	343	13.45	747.3	734.3	774	803.5	783.8	848.4	770.6	811.8	830	734.4	785.1	853.8	767.6	718.5	738.7	737.6
Calcium/calmodulin-dependent protein kinase type 1D	Q8BW96	Camk1d	42.9	17	54.2857	30	385	95.49	4174.6	4289.6	4301.7	4079.7	3918.2	3889.3	4116.4	4027.4	4102.6	3999.1	3335.6	4045.9	3829.3	4117.3	3964.5	3890.3
Calcium/calmodulin-dependent protein kinase type II subunit alpha	P11798	Camk2a	54.1	42	76.1506	413	478	1113.7	53838.9	55529.6	55673	53271.3	56356.3	58073.3	58479.1	59006.1	56568.6	53997.8	45192.1	57088.9	53834.9	58223.8	55878.1	50822.4
Calcium/calmodulin-dependent protein kinase type II subunit beta	P28652	Camk2b	60.4	37	70.2952	276	542	849.7	24297.9	24152.6	24342.6	23258.6	24626.7	25255.3	25182.2	25193.4	24911	23970.6	21087	24813.5	24594.4	25498.5	24953.7	23091.5
Calcium/calmodulin-dependent protein kinase type II subunit delta	Q6PHZ2	Camk2d	56.3	29	59.7194	167	499	384.29	6207.3	5833.3	5917.2	6742	6410.2	6887.1	6099.1	6165.1	5536.6	6324.7	7903	6075.5	6497.9	5794.9	6240.6	6076.5
Calcium/calmodulin-dependent protein kinase type II subunit gamma	Q923T9	Camk2g	59.6	28	58.034	171	529	424.79	9131.9	9223.1	8949.2	9138.9	8856.6	8889.8	8640.7	8909.5	8603.2	9325.8	9323.3	8786.7	8820.5	8807.7	8987.1	8788.5
Calcium/calmodulin-dependent protein kinase type IV	P08414	Camk4	52.6	22	52.6652	34	469	95.44	5536.5	5485.1	5491.5	5441	5594.7	5697.9	5567.4	5563.5	6020.5	6142.7	6221	6583.5	5604.1	5471.9	5508.4	5632.7
Calcium-activated potassium channel subunit alpha-1	Q08460	Kcnma1	134.3	11	12.1588	13	1209	40.43	979.9	1015.3	991	962	966.8	1017.5	1004.4	978.8	937.3	957.3	935.5	916.3	912.7	965.5	939.8	931.8
Calcium-binding and coiled-coil domain-containing protein 1	Q8CGU1	Calcoco1	77.2	10	16.4978	13	691	43.09	1569.7	1535.8	1599.8	1545	1562.2	1532	1604.7	1544.8	1438.7	1440.4	1429.3	1455.9	1503.3	1568.7	1534.8	1492.3
Calcium-binding mitochondrial carrier protein Aralar1	Q8BH59	Slc25a12	74.5	50	80.3545	143	677	539.1	18502.2	18729.9	18318.5	18730.4	18044.9	17285.1	17950.7	18018.7	16993.3	17345.3	16411.9	15871.5	17631.3	18310.3	18169.2	17900.8
Calcium-binding mitochondrial carrier protein Aralar2	Q9QXX4	Slc25a13	74.4	8	18.4911	16	676	50.49	54.8	58.9	52.8	56.4	51.5	50.1	51.1	53.4	58.8	48.5	48.4	46.6	52.3	45.9	56	43.7
Calcium-binding mitochondrial carrier protein SCaMC-2	A2ASZ8	Slc25a25	52.6	11	30.7036	16	469	54.25	482.5	490.6	468.9	472.9	486.1	475.2	472.8	461.7	456	490.5	537.8	475.4	509.6	477.1	475.6	520.8
Calcium-binding mitochondrial carrier protein SCaMC-3	Q6GQS1	Slc25a23	52.5	19	46.8951	28	467	87.76	4116.9	4191.4	4213.9	4135.3	4141.8	3966.9	4065	4080.7	4020.1	4115.2	4015.1	3983.6	4008.1	4137.5	4019.3	4042.8
Calcium-binding protein 39	Q06138	Cab39	39.8	19	53.6657	27	341	83.06	5201.3	5453	5122.9	5272.2	4927.8	4768.3	5059.1	5011.2	5180	5326.4	5098.1	5128.1	5044.8	5282.2	5170.5	5293.9
Calcium-binding protein 39-like	Q9DB16	Cab39l	39.1	8	19.8813	10	337	24.03	336.3	408.2	349.1	417	331.6	313.9	306.4	332.5	401.5	283.6	273.8	301.3	282.5	346.2	408	440.1
Calcium-dependent secretion activator 1	Q80TJ1	Cadps	153	71	58.0812	173	1355	550.61	24090.5	24002	23985	23410.4	23783.7	23626	24272.6	23883.5	23441.3	23061.7	22067.7	22764.7	23583.8	24317.7	23878.2	22978.2
Calcium-dependent secretion activator 2	Q8BYR5	Cadps2	147.7	27	25.4433	43	1297	136.04	1535.5	1554.4	1525	1583	1562.5	1481.6	1518.4	1473.5	1490.8	1502	1450.3	1463.5	1479.6	1434.5	1508.9	1517.5
Calcium-independent phospholipase A2-gamma	Q8K1N1	Pnpla8	87.3	13	19.4588	15	776	37.36	1106.4	1201.6	1129.5	1143.8	1149	1159.4	1086.9	1119.7	1117.9	1142.3	1190.1	1144.2	1078.8	1125	1138.1	1103.6
Calcium-regulated heat stable protein 1	Q9CR86	Carhsp1	16.1	3	23.6486	7	148	26.03	1609.5	1600.2	1660.1	1690.9	1553	1601.7	1644.3	1653.8	1653	1624.8	1550.9	1679	1619.3	1733	1647.6	1746.4
Calcium-responsive transactivator	Q8BW22	Ss18l1	43.7	2	7.46269	2	402	4.42	394	384.5	386.5	403.3	397.6	394.3	398.1	387.3	399	390.5	445.7	422	420.7	365.3	397	378.4
Calcium-transporting ATPase type 2C member 1	Q80XR2	Atp2c1	100.2	12	16.8845	17	918	52.47	1747.3	1717.9	1802.5	1749.9	1787.9	1768.6	1848.7	1757.4	1840.7	1832.9	1769.1	1854.7	1722.5	1818.1	1784.8	1797.9
Calcyclin-binding protein	Q9CXW3	Cacybp	26.5	16	63.3188	29	229	86.49	5575.7	5711.5	5560.7	5635.9	5601.9	5561.5	5693.1	5651.7	5894	5817.7	5955	5728.5	5694.3	5822.2	5692.6	5881.6
Calmin	Q8C5W0	Clmn	117.2	10	12.5475	16	1052	43.64	1702.8	1688.8	1747.6	1751.9	1723.1	1668.7	1759.1	1716.6	1434.7	1713.1	1588.3	1691.7	1685.7	1742.4	1718	1741
Calmodulin regulator protein PCP4	P63054	Pcp4	6.8	10	75.8065	31	62	92.83	7009.7	6675.8	6375.5	6551.6	7087.9	7403.8	6841.4	6944.6	7104.7	7805.7	10255.6	8342.6	7987.1	7365.9	7323.7	8017.7
Calmodulin-2	P0DP27	Calm2	16.8	14	83.2215	316	149	721.86	28898.6	24555.7	25568	23229.2	25209.3	25595.2	25790.4	24649.9	28801.7	27602.7	33506.8	28382.5	32338.9	23791	25968.7	30621.5
Calmodulin-binding transcription activator 2	Q80Y50	Camta2	131.9	3	3.89073	3	1208	7.02	72.6	82.8	82.8	70.1	74.4	67.8	79.7	66.9	81.7	72.6	72.2	86.1	77	68.9	72.6	74.8
Calmodulin-regulated spectrin-associated protein 1	A2AHC3	Camsap1	175.8	19	13.6622	22	1581	37.38	1832.4	1810.9	1810.2	1841.8	1860.4	1885.5	1890.5	1800.3	1863.2	1859.8	1959.3	1883.8	1826.5	1802.4	1806.2	1832.7
Calmodulin-regulated spectrin-associated protein 2	Q8C1B1	Camsap2	164.2	22	18.3436	27	1461	66.3	2077.3	2125.4	2059.5	2090.7	2060.8	2108.8	2033.6	2068.1	2177.4	2083.9	2152.7	2149.6	2048.7	1992.1	1981.5	1966.9
Calmodulin-regulated spectrin-associated protein 3	Q80VC9	Camsap3	135.1	22	23.4824	24	1252	70.05	2262.3	2154.6	2192.4	2186	2262.6	2152.5	2245.7	2196.8	2227.4	2395.2	2315.1	2459.1	2231.9	2327.1	2297.7	2385.7
Calnexin	P35564	Canx	67.2	40	52.7919	75	591	222.57	17119.8	17637.1	17426.5	17324	16994.6	17010.6	16748.6	17177.2	18341.8	18824.9	18186.3	18748.9	16734.3	17108.5	17291.8	16552
Calpain small subunit 1	O88456	Capns1	28.4	8	37.9182	15	269	55.09	1956.2	2049.3	1997.6	2015.4	1934.9	1904.6	1913.4	1925.9	1947.8	1958.3	2070	1924.9	1985.9	1975.6	2019.1	2021.9
Calpain-1 catalytic subunit	O35350	Capn1	82.1	13	21.4586	14	713	43.4	1756.3	1860.9	1789.2	1816.9	1732.5	1751.2	1727	1822.3	1727	1663.6	1671.1	1687.7	1652.9	1714.2	1783.8	1715.6
Calpain-2 catalytic subunit	O08529	Capn2	79.8	32	57	58	700	208.71	4619.8	4665	4641.2	4687.3	4564.2	4547.6	4554	4551.2	4487.6	4567.5	4415.1	4385.1	4507.3	4554.1	4734.7	4611.3
Calpain-5	O08688	Capn5	72.9	21	40.4688	27	640	83.8	3510	3453.7	3480.6	3476.1	3479.2	3436.8	3606.4	3594.4	3697.8	3670	3476.7	3743.8	3402	3552.4	3521.6	3649.2
Calpastatin	P51125	Cast	84.9	2	6.34518	2	788	3.18	214.7	223.4	227.4	222.3	218.6	237.9	204	211.3	202	203.4	233.5	198.1	216.7	202.2	206.1	221.5
Calponin-2	Q08093	Cnn2	33.1	3	11.1475	6	305	21.2	91.1	119.3	91.6	87.2	102.9	79.7	69.8	83	87.9	97.4	158.7	113.8	91.6	75.1	96.3	103.1
Calponin-3	Q9DAW9	Cnn3	36.4	12	40.6061	21	330	61.26	2560	2706.9	2626.7	2648.4	2697.4	2622.7	2586.5	2534.5	2703.7	2657.1	2756.5	2809.5	2727.2	2571.5	2755.2	2774.8
Calreticulin	P14211	Calr	48	31	69.9519	105	416	307.89	18004.9	19068	18531.1	18222.8	18851.2	18541.8	18490.4	18899.4	20534.3	20776.5	20042.8	21226	18677.3	18925.2	19012.2	19478.9
Calretinin	Q08331	Calb2	31.4	22	70.1107	56	271	165.36	10343.6	9403.5	9533.6	11193	10530	10707.7	8897.1	9698.8	9867.9	10583.4	11507.5	10090.9	9729.7	9553.8	11151.7	10778.6
Calsyntenin-1	Q9EPL2	Clstn1	108.8	17	22.6762	24	979	70.41	3569	3591.1	3567.8	3592.6	3605.2	3702.8	3602.4	3703.9	3549.6	3645	3587.1	3754	3597.1	3528.4	3549.5	3632.2
Calsyntenin-3	Q99JH7	Clstn3	105.8	5	5.43933	5	956	18.29	312.3	322.3	324.1	323.2	330.1	300.8	306.1	317.5	304.9	317.2	335.2	306.4	302.2	303.5	303.9	289
Calumenin	O35887	Calu	37	11	37.4603	17	315	67.09	3221.5	3357.7	3259.3	3414.1	3517.9	3579.4	3336.3	3485.8	3790.5	3727.5	4084.3	4084	3441	3333.8	3493.4	3613.3
CaM kinase-like vesicle-associated protein	Q3UHL1	Camkv	54.8	34	58.9844	95	512	364.63	13212	13349.1	13095	13104.1	12889.3	12679.7	12871	12987.6	13077.8	13306.8	12338.5	13404.9	12089.1	13092.8	12761.4	12271.2
cAMP and cAMP-inhibited cGMP 3',5'-cyclic phosphodiesterase 10A	Q8CA95	Pde10a	89.4	5	9.87342	5	790	17.17	424	393	406.6	400.3	414.6	438.5	429.8	427.7	402.2	441.8	407.7	478.5	411.4	414.9	418.5	416.7
cAMP-dependent protein kinase catalytic subunit alpha	P05132	Prkaca	40.5	27	63.8177	58	351	197.7	10246.2	10519.3	10574.9	10992.3	10661.1	10955.2	10394.3	10631	10433.1	10913.7	12306.6	10701.6	10673.4	10403.4	10459.8	10438
cAMP-dependent protein kinase catalytic subunit beta	P68181	Prkacb	40.7	24	63.5328	51	351	167.68	2273.4	2311.9	2137.1	2387.1	2245.4	2197.5	2150.7	2153	2090.9	2329.5	2605.5	2212.7	2231.6	2150.4	2238.4	2251.5
cAMP-dependent protein kinase inhibitor alpha	P63248	Pkia	8	2	42.1053	4	76	18.24	264.8	297.9	305.5	329.1	273.7	307.5	296.8	282.5	280.5	267.2	295.6	264.7	302	281.6	262.9	302.5
cAMP-dependent protein kinase type I-alpha regulatory subunit	Q9DBC7	Prkar1a	43.2	22	64.3045	31	381	99.05	4015	4034.6	4114.7	3962.9	4074.9	3964.7	3955.4	4108.7	3864.9	3958.5	4102.4	3921.2	3955.6	3929.1	4032.7	4105.6
cAMP-dependent protein kinase type I-beta regulatory subunit	P12849	Prkar1b	43.2	17	51.9685	21	381	66.52	1508.7	1513.7	1508.5	1516.1	1501.2	1539.9	1545.5	1549.9	1450.2	1455.8	1556.2	1501.9	1560.5	1508.8	1518.9	1522.9
cAMP-dependent protein kinase type II-alpha regulatory subunit	P12367	Prkar2a	45.4	21	52.1197	57	401	185.36	5948.2	5752.6	5710.9	5982.4	6017.8	5951.4	6023.7	5878.2	5389.1	5461.4	5647.9	5247.6	5976.9	5798.6	6046.1	5899.2
cAMP-dependent protein kinase type II-beta regulatory subunit	P31324	Prkar2b	46.1	26	72.3558	92	416	276.99	8335.5	8205.8	8024.6	8609.7	8374.3	8558.7	8114.2	8121.5	8134.9	9128.3	11282.5	8685.8	8443.7	7845.4	8140.3	8224.1
cAMP-regulated phosphoprotein 19	P56212	Arpp19	12.3	4	56.25	8	112	28.52	717.6	738.3	689.2	730.3	704.9	773	708.8	752.2	706.9	801.3	871.7	787.6	744.5	743.7	775.7	792
cAMP-regulated phosphoprotein 21	Q9DCB4	Arpp21	88.5	4	6.19579	5	807	12.98	750	756	712.9	780.1	845.9	883.2	796.7	837.7	645.8	754.9	884.9	715.5	857	740.6	795.1	822
cAMP-specific 3',5'-cyclic phosphodiesterase 4A	O89084	Pde4a	93.5	6	8.53081	6	844	18.22	258	272.6	279.2	281.9	271.3	287.8	271.7	279.1	267.5	269.4	274.9	263.8	297.8	349.8	283.6	359.5
cAMP-specific 3',5'-cyclic phosphodiesterase 4D	Q01063	Pde4d	84.5	17	28.2463	20	747	52.8	2576.7	2738.7	2720.7	2704.9	2638.6	2551.3	2634.5	2629.5	2595	2673	2478.2	2616.1	2539.2	2673.8	2637.4	2619.9
Cancer-related nucleoside-triphosphatase homolog	Q9CQA9	Ntpcr	20.7	4	34.2105	7	190	15.17	386.3	392.9	426.7	391.3	411.3	404.3	389.6	400	387.4	408.6	402.8	410.5	404.2	397.5	386.6	392.8
Cancer-related regulator of actin dynamics	Q5PR69	Crad	132.2	10	9.19635	12	1207	27.35	825.8	840.7	865.7	876.4	866.5	851.3	835.4	874.1	867.9	858.7	863.7	871	826	800.6	806.3	799.2
Cannabinoid receptor 1	P47746	Cnr1	52.8	7	16.7019	8	473	23.89	2199.6	2292.5	2282.3	2226.4	2244.8	2299.9	2274.7	2266.7	2335.1	2344.3	2262.2	2225.9	2239.6	2306.5	2206.1	2203.3
CAP-Gly domain-containing linker protein 1	Q922J3	Clip1	155.7	55	41.0496	76	1391	227.17	11928.4	11983.9	11881.8	11912.4	12214.6	12603	12505.4	12245.4	12220	12136.6	12081.7	12306.6	12272.6	12277.8	12120.1	12296.8
CAP-Gly domain-containing linker protein 2	Q9Z0H8	Clip2	115.8	55	56.256	76	1047	246.08	7595.6	7566.5	7531.4	7596.4	7685.4	7830.6	7846	7754	7620.9	7735.4	7748.6	7821	7772.4	7603.6	7601.3	7826.6
CAP-Gly domain-containing linker protein 3	B9EHT4	Clip3	59.5	5	13.3455	6	547	17.67	318.1	348.6	331.2	334.7	349.7	349.9	369.5	339.8	337.3	340.5	331.4	363	367.6	353.9	342	320.5
Capping protein, Arp2/3 and myosin-I linker protein 2	Q3V3V9	Carmil2	141.3	10	10.3395	15	1296	60.62	2178.3	2170.8	2173	2151.2	2151	2243.1	2247.5	2261.3	1992.1	2009.3	1839	2004.5	2096.7	2215.8	2130.1	2199.3
Caprin-1	Q60865	Caprin1	78.1	18	22.2065	28	707	83.89	3418.8	3618.7	3417.8	3441.6	3530.7	3545.1	3522.8	3551.3	3682.4	3692.7	3786.4	3712.7	3516.2	3478.3	3432.2	3484
Cap-specific mRNA (nucleoside-2'-O-)-methyltransferase 1	Q9DBC3	Cmtr1	95.6	2	3.10633	2	837	6.35	147.1	157.9	154.3	145.9	148.3	131.8	128.1	129.7	136.7	136.6	145.3	127.1	134.7	138.4	131.1	126.8
Carbonic anhydrase 1	P13634	Ca1	28.3	6	36.3985	7	261	29.02	896.3	1140.5	1035.4	1053.5	923.9	877.9	836.2	836.6	992.8	748.6	1009.7	871	895.5	855.4	872	969.6
Carbonic anhydrase 14	Q9WVT6	Ca14	37.5	3	12.1662	5	337	15.43	258.3	263.9	266.2	290.8	230.4	265.3	289.6	266	245.6	226.8	212.3	208.9	254.7	269.6	293.4	305.4
Carbonic anhydrase 2	P00920	Ca2	29	14	55.3846	54	260	201.62	8272.3	8269.8	8591.3	8901	7611.9	7569.8	8036.9	7826	6422.5	6098.3	5950.8	5580.8	7995.3	8197.8	8224.1	8825.6
Carbonic anhydrase 4	Q64444	Ca4	34.3	7	25.5738	15	305	43.95	2633.7	2466.1	2481.1	2479.6	2300.4	2337.5	2484.5	2348.8	2446.2	2458	2211.6	2359.3	2309.2	2408.1	2438.2	2326.5
Carbonic anhydrase 5B, mitochondrial	Q9QZA0	Ca5b	36.6	2	8.20189	2	317	6.5	172.5	158.2	139.7	158.7	152.5	148.5	156	157.8	167.1	167	162.6	172.8	140.3	164.3	146.7	142.5
Carbonyl reductase [NADPH] 1	P48758	Cbr1	30.6	21	76.8953	42	277	155.08	7056.3	6967.2	7066	7055.4	6782.6	6587.1	6681.6	6688.7	6516.2	6616.6	6785.5	6396.9	6763.1	6665.7	6695.9	6919.6
Carbonyl reductase [NADPH] 3	Q8K354	Cbr3	30.9	19	72.9242	37	277	126.67	4842.1	4823.2	4849.7	4748.9	4694.3	4540.9	4612.4	4671.1	4452.7	4548.6	4470.7	4545.7	4652.8	4516.4	4544.3	4718.8
Carbonyl reductase family member 4	Q91VT4	Cbr4	25.4	8	39.8305	13	236	40.34	1634.2	1651.3	1672.8	1680.8	1610.7	1609.2	1580.3	1660.8	1544.1	1520.5	1401.2	1523.6	1516	1707.8	1622.5	1546.5
Carboxylesterase 1C	P23953	Ces1c	61	11	26.3538	15	554	46.45	2142.8	2417.9	2177.6	2150	2168	1886.4	1844.9	1942.8	2247.9	2013.3	2400	2328.8	1949.2	1993.8	1984.4	2163.8
Carboxyl-terminal PDZ ligand of neuronal nitric oxide synthase protein	Q9D3A8	Nos1ap	55.8	2	8.54871	2	503	0
Carboxymethylenebutenolidase homolog	Q8R1G2	Cmbl	27.9	10	43.6735	13	245	39.91	1261.6	1287.4	1221.9	1297.1	1173.2	1094.2	1047.2	1071.9	1060.4	1180.2	1457.8	1072.8	1144.5	1064	1168.6	1200.9
Carboxypeptidase D	O89001	Cpd	152.3	8	7.33479	12	1377	34.27	768	811.1	773.9	769	777.1	820.7	772.4	822.5	772.5	779.5	796.5	779.2	820.4	759.2	793	836.8
Carboxypeptidase E	Q00493	Cpe	53.2	23	50.6303	44	476	142.54	6629.9	6348.7	6514.3	6363.3	6584.9	6542.2	6550.2	6661.5	6921.2	6935.8	6699.9	6950.2	6561.3	6606.4	6630.5	6449.9
Carboxypeptidase M	Q80V42	Cpm	50.5	11	25.2822	12	443	33.45	1728.9	1727.2	1763.2	1803.2	1611	1630.7	1775.3	1712.2	1541.6	1483.7	1329.8	1431.3	1761.9	1819.5	1808.8	1875.1
Carboxypeptidase Q	Q9WVJ3	Cpq	51.8	2	7.23404	3	470	12.16	144.1	155.1	125.3	135.5	139.7	134.3	123.6	124.8	150.1	132.1	143.8	160.7	132.6	149.4	148.1	129.8
Carnitine O-acetyltransferase	P47934	Crat	70.8	22	39.2971	32	626	83.29	3431.4	3399.5	3375.8	3428.4	3610.2	3546.6	3497.6	3541.1	3466.1	3358.1	3518.2	3382.8	3402.9	3495.8	3495.7	3468.9
Carnitine O-palmitoyltransferase 1, brain isoform	Q8BGD5	Cpt1c	90	15	23.183	20	798	63.28	2145.9	2199.7	2227.6	2172.8	2079.8	2092.9	2073.9	2167.9	2172.5	2062	1969.5	2079.1	2017.1	2060.3	2020.9	1981.6
Carnitine O-palmitoyltransferase 1, liver isoform	P97742	Cpt1a	88.2	8	12.9366	10	773	30.89	1411.7	1493.2	1362.4	1515.6	1369.3	1386.1	1350.5	1347.4	1542.1	1489.3	1537.4	1552.2	1308.1	1366.4	1426.9	1398.8
Carnitine O-palmitoyltransferase 2, mitochondrial	P52825	Cpt2	73.9	13	25.8359	14	658	38.07	1477.2	1482.2	1503.4	1521.5	1454.6	1403	1344	1450.3	1449.4	1469.1	1515.2	1468.1	1404.4	1390.2	1486	1465.6
Cartilage acidic protein 1	Q8R555	Crtac1	70.3	12	27.2446	21	646	71.42	2112.3	2066.7	2110.7	2137.6	2178.1	2141.2	2094.1	2132.8	2064.7	2136.8	2147	2106.1	2108.4	2062.6	2148.8	2049.2
Casein kinase I isoform alpha	Q8BK63	Csnk1a1	38.9	8	24.6291	12	337	30.74	1495.4	1509	1449.1	1427.1	1442.3	1478.1	1471.7	1444.4	1472	1504.8	1526.8	1504.9	1445.9	1503.3	1479.9	1479.9
Casein kinase I isoform delta	Q9DC28	Csnk1d	47.3	15	35.9036	17	415	48.75	332.6	358.6	354.1	349.5	344.2	350.3	332.9	372.9	363.3	350.4	345.6	324.9	343.4	328.2	333.5	326.2
Casein kinase I isoform epsilon	Q9JMK2	Csnk1e	47.3	16	40.1442	18	416	53.93	2301	2394.4	2257.8	2347.7	2335.6	2268.9	2275.3	2242.4	2384.8	2424	2549.8	2403.1	2293.6	2333.7	2292.8	2313.1
Casein kinase I isoform gamma-1	Q8BTH8	Csnk1g1	52.7	6	14.8148	10	459	29.88	53.8	65.6	51.4	61.5	62.2	57.2	54.9	65.6	61.2	55.9	52.1	61.4	54.9	57	58.5	59.7
Casein kinase I isoform gamma-2	Q8BVP5	Csnk1g2	47.6	7	19.2771	12	415	28.69	32.3	36.3	32.5	37.3	36.1	37.5	32.6	35	26.2	32.5	31.9	34.6	32.8	33.7	27.8	26.3
Casein kinase I isoform gamma-3	Q8C4X2	Csnk1g3	48.9	8	20.9906	12	424	26.89	2060.1	2132.5	2056.5	2082.5	1999.7	1963.3	2037.1	2006.5	2080.3	2128.8	2057.2	2059.2	2023.1	1983.8	2027.3	2003.3
Casein kinase II subunit alpha	Q60737	Csnk2a1	45.1	16	54.4757	37	391	140.59	5161.9	5242.2	5333.6	5275.1	5200.9	5199	5226.4	5224.4	5451.8	5439.3	5366.2	5374.7	5266.2	5191.2	5095.5	5086.6
Casein kinase II subunit alpha'	O54833	Csnk2a2	41.2	15	53.1429	21	350	69.69	1931	1973.5	1999.3	1950.5	1941.6	1976.5	1934.2	1985.4	1913.6	1989	1892.9	1964.2	1919.8	1938.3	1935.8	1913.6
Casein kinase II subunit beta	P67871	Csnk2b	24.9	8	49.3023	20	215	71.47	2380.2	2279.3	2348.2	2293.6	2300	2272.8	2365.6	2253.4	2381.9	2368.6	2469.5	2351	2470.9	2299.8	2262.5	2304.4
Caseinolytic peptidase B protein homolog	Q60649	Clpb	76	13	25.2585	13	677	38.8	859.6	870.2	959.6	932.1	918.9	971.4	956.2	917.5	928.5	861.9	891.2	874.4	863.6	1041.5	902.2	884.3
Caskin-1	Q6P9K8	Caskin1	150.4	52	47.659	92	1431	347.49	11328.2	11142.6	11164.8	11416.4	11202.3	11316.3	11000.3	11069.6	10963.1	11277.4	11527.5	11139.3	10782.9	10807.4	10839.2	11247.8
Caspase-3	P70677	Casp3	31.5	2	11.5523	2	277	7.81	173	178.6	175	173.8	183.3	192.9	186.3	179.7	213.6	192.2	184.2	229.9	181.9	185.1	179.4	191.5
Catalase	P24270	Cat	59.8	20	52.1822	25	527	85.17	2764.9	2862.1	2928.9	2914.1	2786.1	2726.2	2752.6	2698	3201.6	3179	3142.9	3379.4	2713.9	2778.4	2949.4	2940.2
Catechol O-methyltransferase	O88587	Comt	29.5	7	34.717	11	265	43.2	750.4	728.9	742.8	719.6	727.7	710.1	705	699.7	719.3	765.8	725.9	750.2	693.7	738.7	723.5	719.8
Catechol O-methyltransferase domain-containing protein 1	Q8BIG7	Comtd1	28.9	6	37.4046	20	262	77.2	1602	1592	1565.1	1629	1505.5	1440.9	1490.6	1502.3	1589.6	1560.7	1494.5	1498.2	1414.9	1442.9	1470.7	1389.9
Catenin alpha-1	P26231	Ctnna1	100	28	37.7483	46	906	153.13	1229.9	1271.9	1266.8	1270.2	1248.4	1285.9	1250.4	1216.8	1256.5	1250.6	1307.7	1309.9	1229.3	1196.3	1235.2	1216
Catenin alpha-2	Q61301	Ctnna2	105.2	56	66.0021	113	953	444.9	13841.3	13708.3	13644.5	13603	13436.2	13139.6	13346.1	13336.5	13788.1	14322.1	14251.9	14127.5	13092.1	13225	13343.5	13128.1
Catenin beta-1	Q02248	Ctnnb1	85.4	32	50.4481	72	781	205.96	8257.8	8359.4	8234.9	8171.5	7976.5	7781.4	7799.8	7768.5	8381.9	8765.7	8765.9	8582.5	7841.2	7933.5	8041	7819.3
Catenin delta-1	P30999	Ctnnd1	104.9	28	36.3539	33	938	104.91	2628.2	2782.2	2724.4	2679.1	2771.6	2759	2707.6	2764.2	2810.7	2871.4	2941.4	2966.1	2665.2	2771.9	2821.4	2792.7
Catenin delta-2	O35927	Ctnnd2	134.9	46	43.9455	70	1247	221.55	7407.6	7192.1	7091.4	7152.8	7036.3	7052.2	6956.3	7029.8	7164.9	7713.5	7904.1	7661.9	6985	6970.2	6988	6794.7
Cathepsin B	P10605	Ctsb	37.3	9	47.1976	20	339	71.29	1891.4	1977	1863.7	1927.7	1773.9	1765.4	1778.5	1783.6	1895.6	1902.8	1995.5	1884.1	1906.1	1807.1	1802	1952.7
Cathepsin D	P18242	Ctsd	44.9	17	42.9268	45	410	143.95	5517.8	5552.3	5579.5	5737.5	5526.8	5407	5509.5	5519	5880.2	5423.3	5748.8	5615.4	5709.1	5604.9	5681.6	6056.9
Cathepsin F	Q9R013	Ctsf	51.6	3	6.70996	3	462	5.58	562.8	550.9	554.7	559	542.7	559.3	545.8	555.9	542.4	588.6	584	560.5	542.3	561.4	538.9	569.4
Cathepsin L1	P06797	Ctsl	37.5	5	23.0539	5	334	14.84	347.5	334.4	363.4	333.9	344.3	365.3	348.9	352.2	370.3	350.2	427.8	350.2	322.3	361.7	334.2	326.1
Cathepsin Z	Q9WUU7	Ctsz	34	5	29.085	5	306	11.94	189	219	193.4	203.6	204.3	201.7	209.5	198.3	194.6	183.5	222.2	213.2	196.2	195.4	218.9	239.9
Cation-dependent mannose-6-phosphate receptor	P24668	M6pr	31.2	8	35.2518	9	278	31.56	830.5	859.8	859.5	830.3	832	790.4	831.7	846.9	845.7	854.7	801.4	836.4	822.1	844.4	824.9	813.1
Cation-independent mannose-6-phosphate receptor	Q07113	Igf2r	273.6	3	1.49013	3	2483	6.3	563.6	572.8	547.1	582.8	571.8	565	574.2	560.3	556.6	543.7	521.7	568.3	547.4	542.3	556.8	579.6
Caveolae-associated protein 1	O54724	Cavin1	43.9	8	27.2959	10	392	37.28	512.2	588.6	535.5	499.7	502.7	457.7	416.9	431.4	510.6	484.9	672.5	536.5	495.8	454.5	538.2	532.7
Caveolin-1	P49817	Cav1	20.5	5	29.2135	8	178	21.33	1158.2	1355.8	1230.2	1121.1	1214.5	1042.4	993.1	1023	1042.3	1189.1	1458.2	1225.8	1094.9	1024.8	1246.9	1196.2
Caytaxin	Q8BHE3	Atcay	42.2	10	40.3226	16	372	53.54	2384.8	2336.4	2324.8	2323.4	2495.1	2460.6	2410.1	2442.9	2312.1	2371.2	2424	2363.5	2538.5	2382.4	2393.8	2349.9
CB1 cannabinoid receptor-interacting protein 1	Q5M8N0	Cnrip1	18.6	13	82.9268	46	164	129.46	7819.8	7464.4	7657.5	7649.4	7669.4	7620	7761.6	7794.7	7732.2	7756.6	8026.7	7549	8021.4	7622.6	7679.1	7771
CBP80/20-dependent translation initiation factor	Q6PEE2	Ctif	67.8	3	6.5	3	600	7.76	83	80.2	97.5	80.7	79.4	81.7	79.8	87	93.5	85.8	88.9	92	75.3	94.8	68.6	79.6
CCA tRNA nucleotidyltransferase 1, mitochondrial	Q8K1J6	Trnt1	49.9	17	44.0092	19	434	57.69	2513.9	2509.9	2439.8	2541.6	2497.2	2530.5	2485.4	2394.9	2623.2	2567	2673.9	2622.2	2543.8	2481.5	2556.3	2506.3
CCR4-NOT transcription complex subunit 1	Q6ZQ08	Cnot1	266.6	14	7.62105	17	2375	46.21	792.5	774.7	763.7	790	781.4	770.9	777.1	799.7	800.2	791.9	807.8	799.4	804.1	756.8	773.8	792.4
CCR4-NOT transcription complex subunit 10	Q8BH15	Cnot10	81.8	2	3.62903	2	744	7.16	247.6	270	242.6	247.5	236.3	224	243.3	232.2	239.2	238.2	251.5	252.7	245.9	262.2	230.4	245.7
CCR4-NOT transcription complex subunit 2	Q8C5L3	Cnot2	59.7	4	13.1481	4	540	9.48	268.2	273.4	269.9	259.1	257.4	264	266.3	260.4	273.6	267.3	265.8	272.5	258.8	261.3	272.4	268.8
CCR4-NOT transcription complex subunit 3	Q8K0V4	Cnot3	81.9	4	6.79095	4	751	10.62	307.9	301.3	325	303	321.2	326	295.2	298.8	302.7	305.8	295.5	316.6	307.9	307.9	303.3	307.1
CCR4-NOT transcription complex subunit 4	Q8BT14	Cnot4	63.4	2	4.52174	2	575	5.93	145	136.6	149.4	145	127.4	141.9	136.4	150.8	133.4	141.7	151.5	149.4	143.3	134.8	133.4	139.7
CCR4-NOT transcription complex subunit 7	Q60809	Cnot7	32.7	2	9.12281	2	285	6.29	286.3	265.1	289.7	290.8	289.9	280	297.3	285.6	290.3	289.6	289.3	299	270.1	284.1	278.3	287.2
CCR4-NOT transcription complex subunit 9	Q9JKY0	Cnot9	33.6	4	16.0535	5	299	17.64	625.7	611	594	594.7	625.4	593.7	618.4	586.5	595.6	626.4	588.8	605.6	602	593.5	595.5	611.2
CD109 antigen	Q8R422	Cd109	161.6	3	3.25936	3	1442	7.02	60.5	50.7	61.1	57.1	61.1	53.9	61.7	58.1	58.5	64.6	52.9	59.4	54.3	53.3	62.4	58.9
CD166 antigen	Q61490	Alcam	65.1	24	43.7393	47	583	145.93	5692	5673	5677.6	5812.6	5456.9	5515.8	5264.6	5256.5	5678.6	5913.4	7154.8	5718	5618.2	5045.2	5369.2	5245.9
CD44 antigen	P15379	Cd44	85.6	2	2.69923	2	778	6.08	183.4	176.4	172.2	174.3	182.1	192.1	180.1	184.2	197.5	212.4	230.9	196.9	190	171.4	185.7	194.4
CD81 antigen	P35762	Cd81	25.8	3	27.5424	14	236	59.4	1472.6	1465.6	1538.7	1548.4	1334.3	1341.5	1453.9	1436.9	1550.3	1484.4	1448.7	1396.9	1668	1623.1	1537.8	1658.1
CD82 antigen	P40237	Cd82	29.6	3	12.0301	7	266	20.09	1571.6	1512.1	1593.3	1678.6	1256.2	1411.8	1488.8	1405.8	1127.8	1006.3	870.9	976.9	1418.7	1511.3	1485.2	1445.6
CD9 antigen	P40240	Cd9	25.2	3	15.9292	10	226	38.2	949.9	932.9	1060.4	1047.9	894.8	958	981.2	980.5	937.2	807.3	783.1	878.3	1071.7	1035.3	1010.4	1122.4
CD99 antigen-like protein 2	Q8BIF0	Cd99l2	25.4	2	14.346	2	237	9.25	236.1	232.8	250	250.3	254.8	230.9	242.7	248.4	224.3	234.3	224.8	224.7	229.8	232.9	228.2	238.8
Cdc42 effector protein 1	Q91W92	Cdc42ep1	43.1	4	11.7359	4	409	10.43	469.6	469.6	465.1	479.7	460.2	455.2	472.7	483.9	479.9	460.5	467.6	441	470.7	460.9	449.8	508.5
Cdc42 effector protein 4	Q9JM96	Cdc42ep4	37.8	9	32.6648	13	349	46.11	1231.4	1276.3	1258.2	1262.6	1276.3	1361	1272.8	1330.6	1263.3	1227	1226.8	1302.3	1249.7	1247.8	1294.4	1298.1
CDGSH iron-sulfur domain-containing protein 1	Q91WS0	Cisd1	12.1	10	54.6296	37	108	114.13	5366	5129.6	5462.6	5627	5896.7	6139.5	5807.8	5677.4	5345.9	5158.6	5231.8	5133.9	5904.1	5771	5764.6	5387.9
CDGSH iron-sulfur domain-containing protein 2	Q9CQB5	Cisd2	15.2	5	37.7778	7	135	21.04	989	1005.6	1005.5	1032.5	1003.1	1013.6	1009.4	1021.6	1023.9	1061.3	1015.1	1061.8	967.2	987.8	1059.4	1001.3
CDGSH iron-sulfur domain-containing protein 3, mitochondrial	B1AR13	Cisd3	15.7	7	48.9051	8	137	24.04	1763.2	1684.6	1729.9	1706	1719.3	1751.1	1696.9	1772.6	1607	1685.1	1653.9	1633.3	1738.9	1713	1727.8	1740.6
CDKN2A-interacting protein	Q8BI72	Cdkn2aip	59.7	2	3.90764	2	563	5.23	206.3	232.6	219.9	223	225.6	244.8	231.5	235.9	217.4	236	220.1	221.6	223.7	222.8	231.3	214.7
CDP-diacylglycerol--glycerol-3-phosphate 3-phosphatidyltransferase, mitochondrial	Q8BHF7	Pgs1	62.4	8	20.6148	8	553	29.49	399.2	415.4	414	409.5	405.9	408.6	429.3	397.6	423.6	435.9	428.8	415.4	404.1	406.7	395.3	384.1
CDP-diacylglycerol--inositol 3-phosphatidyltransferase	Q8VDP6	Cdipt	23.6	3	13.1455	6	213	14.06	933.9	986.1	898.3	865.2	1016.6	904.6	865.6	902	947.4	1020.4	941.7	940.3	900.4	907.9	883.9	821.1
Cell adhesion molecule 1	Q8R5M8	Cadm1	49.8	15	44.7368	38	456	148.24	4747.3	4656.5	4726.7	4847.6	4717.6	4716.4	4644.8	4645.1	4343.1	4754.1	4948.9	4415.4	4751	4389.9	4641.5	4630.9
Cell adhesion molecule 2	Q8BLQ9	Cadm2	47.5	18	46.2069	51	435	176.3	7116.1	6918	6955.1	6782.7	7098.4	7376.9	7541.8	7384.4	7156.9	7286.1	6618.6	7398.9	7519.9	7567.7	7407.6	7125.4
Cell adhesion molecule 3	Q99N28	Cadm3	42.9	15	45.7071	35	396	141.11	6027.7	5751.3	5898	5958.6	5678.5	5989.5	5854	5920.5	5400.6	5566	5497.3	5323.8	5834.4	5601.4	6001.5	5632.3
Cell adhesion molecule 4	Q8R464	Cadm4	42.7	12	42.268	23	388	98.86	2202.9	2301.1	2271.8	2421.1	2281.5	2313.9	2309.1	2274.1	2149.3	2244.8	2200.1	2188.2	2400.8	2296.5	2409	2365.7
Cell cycle and apoptosis regulator protein 2	Q8VDP4	Ccar2	102.9	30	46.4208	47	922	158.72	5173.2	5345.3	5197.2	5284.9	5304	5303.4	5141.7	5334.9	5274.4	5380.6	5454.5	5599.5	5079.9	5132.6	5276.7	5176.8
Cell cycle control protein 50A	Q8VEK0	Tmem30a	41	13	34.6154	20	364	54.38	4058.7	3994.3	4124.3	3915.1	4042.1	3856.8	4150	4027.1	3954.4	3923.2	3983.1	4259.5	3964.3	4244.9	4197.1	4540.4
Cell cycle exit and neuronal differentiation protein 1	Q9JKC6	Cend1	15	16	69.7987	58	149	192.85	12458.7	11748	11998.5	12130.6	12861.9	13445.9	12873.4	12966.2	12084.7	12100.1	12291.7	11923.4	12495	12643.3	12648.7	11934
Cell death-inducing p53-target protein 1	Q9DB75	Cdip1	21.8	2	7.69231	2	208	4.71	221.4	214.1	203.7	236	248.6	219.6	227.2	216.8	194	188.6	178.6	206.5	189.6	211.5	212.3	194.1
Cell division control protein 42 homolog	P60766	Cdc42	21.2	11	49.7382	42	191	143.98	5161.8	5077.2	5026.6	4951.4	4869.2	4780	4961	5146.7	4990.4	5159.8	4826.5	4993.5	4779.8	4935.9	4959	4894.4
Cell division cycle 5-like protein	Q6A068	Cdc5l	92.1	15	30.0499	18	802	53.46	2324.3	2392.5	2454.1	2453.4	2495	2453.4	2342	2417.2	2453.8	2410	2560.3	2579.6	2371.1	2371.3	2418.1	2462.7
Cell division cycle and apoptosis regulator protein 1	Q8CH18	Ccar1	132	14	13.089	20	1146	44.32	1654.7	1707.3	1697.6	1700.9	1769.2	1788.4	1729.7	1741.7	1779.9	1799.6	1821.4	1851.2	1773.9	1747.9	1783.4	1753
Cell division cycle protein 123 homolog	Q8CII2	Cdc123	38.8	2	4.7619	3	336	4.59	15.1	11.2	13.9	9.6	10.4	8.3	16.1	11.5	14.9	11.6	13.9	11.8	10.7	11.9	11.8	10.9
Cell division cycle protein 16 homolog	Q8R349	Cdc16	71.4	5	10.4839	5	620	17.76	616.6	669	626	600.5	602.9	570.4	613.1	577.6	606.9	610.1	618.4	588.4	587	578.8	621.9	572.8
Cell division cycle protein 23 homolog	Q8BGZ4	Cdc23	68.5	2	3.35008	2	597	2.15	276.2	270.5	262.5	290.9	288.2	273.2	277	272	285.6	262.5	284.1	268	295.2	272.9	270.9	263.8
Cell surface glycoprotein MUC18	Q8R2Y2	Mcam	71.5	5	9.72222	7	648	18.45	354.4	390.3	376.5	376.9	395.3	390.3	385.2	380.3	479.8	437.1	414.8	502.8	386.7	424.6	386.7	412.2
Cellular nucleic acid-binding protein	P53996	Cnbp	19.6	9	53.9326	22	178	55.93	2040.1	2033.6	2038.3	2025.1	2039.3	2144.3	2022.4	2048.2	2090.8	2022.4	2168.7	2133.1	2178.4	2025.3	2068.3	2118.6
Centrin-2	Q9R1K9	Cetn2	19.8	7	55.2326	12	172	39.86	2009.1	2030.9	2017	2084.3	2145.4	2144.7	2095.5	2085.3	1964	1984.6	2046.9	2085.2	2032.1	2031.3	2044.9	2150.7
Centriole, cilia and spindle-associated protein	Q8QZT2	Ccsap	28.4	13	55.5556	20	252	68.6	2030.6	2153	2094.2	2017.1	2095.8	2163.7	2073.1	2120.6	1770.1	1835.7	1643.6	1831.2	2044.5	2107	2089.3	2002
Centromere protein V	Q9CXS4	Cenpv	27.5	12	66.2698	17	252	72.77	2698.7	2758.3	2656.4	2772.7	2817.2	2806.5	2637.3	2741.1	2635	2633	2654.9	2587.9	2738.7	2760.3	2807.1	2681.5
Centromere/kinetochore protein zw10 homolog	O54692	Zw10	88	2	4.62131	2	779	2.77	9.7	12.9	18.6	14.4	15.3	10.6	11.1	11.3	15.1	12.6	12.4	10.9	10.4	10.4	9.1	12.4
Centrosomal protein of 112 kDa	Q5PR68	Cep112	112.6	3	3.03983	3	954	1.64	118.9	131	111.2	116.4	111.2	104.1	111	118.4	123.8	109.4	119.2	117.1	115.9	117.4	116.1	109.5
Centrosomal protein of 170 kDa	Q6A065	Cep170	174.9	51	32.3048	72	1588	182.14	8194.2	8100.8	8244.1	8157.8	8162.3	8252.8	8089	8283.2	8217.5	8224.3	8186.7	8402.8	7923.4	7994.3	8113	8074
Centrosomal protein of 170 kDa protein B	Q80U49	Cep170b	170.7	42	31.5756	48	1574	125.6	4231.8	4139	4276.1	4243	4134	4274.1	4202.7	4117	4179.4	4172.5	4236.7	4176	4084.5	4073.1	4035	4093.8
Centrosomal protein of 41 kDa	Q99NF3	Cep41	41.4	2	8.0429	2	373	7.47	67	62.5	62.1	60.7	57.2	54.9	63.2	54.5	58	53.7	60.6	54.5	53	55.3	52.9	55.7
Ceramide synthase 6	Q8C172	Cers6	44.8	4	7.55208	4	384	7.88	115.1	116.7	123.1	117.4	114.6	128.8	118.1	115.5	127.7	123	131.2	122.2	126.9	126.7	121.1	107.7
Cerebral cavernous malformations protein 2 homolog	Q8K2Y9	Ccm2	49.9	3	10.8168	4	453	17.23	317.6	323.1	348.1	319.1	351	343.7	353.9	341.8	311.5	318.8	334.9	340.2	336.7	314.1	330.7	324.1
Ceruloplasmin	Q61147	Cp	121.1	11	10.9331	12	1061	20.68	570.8	580.5	623.2	558.2	560.6	549	467.9	557.3	550.9	539.5	550.5	541.2	519.5	515.4	537.7	565.8
cGMP-dependent 3',5'-cyclic phosphodiesterase	Q922S4	Pde2a	105.6	39	49.7338	76	939	249.54	8018.1	8126.4	7961.5	8043.2	7918	7928.5	7915.7	7893.1	7928.1	8376.1	8217.6	8073.3	7736.5	7875.8	7783.3	7703.4
Charged multivesicular body protein 1a	Q921W0	Chmp1a	21.6	8	29.5918	10	196	24.29	1570.9	1563.5	1470.9	1561.5	1551.7	1614.7	1666	1567.5	1629.7	1581.2	1725.7	1627.2	1621.4	1556.6	1562.8	1609.3
Charged multivesicular body protein 1b-1	Q99LU0	Chmp1b1	22.1	5	19.598	6	199	15.58	161.8	162.2	154.2	144.8	166.1	161.9	161.4	151.4	160	179.8	169.8	181.5	144.9	179.2	176.1	151.7
Charged multivesicular body protein 1b-2	Q9CQD4	Chmp1b2	22.1	7	27.6382	8	199	19.96	1198.2	1318	1127.2	1206.1	1195.1	1199	1183.3	1180.4	1208.1	1207.9	1281.8	1247	1211.4	1181.7	1229.6	1264.7
Charged multivesicular body protein 2a	Q9DB34	Chmp2a	25.1	9	29.7297	10	222	21.24	2544.9	2516.2	2607.6	2739.6	2706.7	2720.1	2716.7	2662.8	2615.1	2646.5	2673.2	2597.6	2704.2	2713.3	2717	2708.8
Charged multivesicular body protein 2b	Q8BJF9	Chmp2b	23.9	5	16.4319	5	213	11.6	752.9	762.5	722.6	757.8	767.2	770	768.6	752.4	796.5	767.1	842.5	800.9	762.3	719.8	745.6	766.1
Charged multivesicular body protein 3	Q9CQ10	Chmp3	25.2	8	29.4643	9	224	22.93	1477.6	1460.8	1441.8	1482.8	1450.8	1385.5	1445.5	1465.3	1422.3	1447.5	1469.9	1434	1393.4	1431.8	1475.2	1496
Charged multivesicular body protein 4b	Q9D8B3	Chmp4b	24.9	9	37.0536	15	224	44.27	2480.4	2379	2457	2420.4	2516.4	2507.3	2438	2531.6	2410.5	2471.1	2421	2503.8	2554.4	2489.5	2462.1	2507.6
Charged multivesicular body protein 5	Q9D7S9	Chmp5	24.6	9	49.3151	20	219	44.89	1580.6	1534.9	1535.4	1558.5	1533.5	1582.6	1600.8	1544.3	1546.7	1544	1523.1	1580.4	1600.8	1569.2	1623.4	1653.4
Charged multivesicular body protein 6	P0C0A3	Chmp6	23.4	4	22.5	5	200	17.43	487.5	515.1	488.9	507.7	481.1	470.2	492.7	504.6	482.6	499.3	391.7	406	350.2	390.1	387.7	398.6
Charged multivesicular body protein 7	Q8R1T1	Chmp7	50.6	12	34.3681	17	451	61.96	1330.1	1345.9	1432.6	1397.3	1388.9	1408.8	1376.5	1376.3	1315.8	1350.2	1423.8	1305.3	1335.1	1342.7	1334.5	1318
Chitinase domain-containing protein 1	Q922Q9	Chid1	44.9	13	32.3155	19	393	56.77	2180.3	2179.5	2199.3	2127.7	2193.8	2175	2107.6	2136.9	2227.6	2210	2129.5	2291.1	2082.8	2093.4	2160.8	2172.7
Chloride channel protein 2	Q9R0A1	Clcn2	99.4	3	4.18502	3	908	8.31	113.2	101.2	115.6	116.4	103.1	113.5	110.5	113.8	106.2	107.1	102.7	108	97.1	104.3	105.2	110.4
Chloride intracellular channel protein 1	Q9Z1Q5	Clic1	27	9	49.3776	11	241	36.89	983.6	999.4	1012	1039	1057.3	992.6	993.9	985.8	1065	1050.7	1093.8	1099.6	1013.7	1032	1064.8	1119.6
Chloride intracellular channel protein 4	Q9QYB1	Clic4	28.7	12	65.2174	20	253	65.66	1982.9	2060	2051.9	2164.3	1992.8	1978.6	2183.5	2143.7	2312	2171.3	2178.9	2305.1	2219.7	2183.4	2195	2282.6
Chloride intracellular channel protein 5	Q8BXK9	Clic5	28.3	4	13.1474	6	251	9.38	43.6	40.4	34.8	47.2	41.4	33	33.6	33.9	39.1	37.3	43.4	32.3	35.8	37.7	38.9	46.2
Chloride intracellular channel protein 6	Q8BHB9	Clic6	62.8	16	42.953	22	596	65.55	1981.5	2676.9	2245.9	2875.3	2286.2	2140.8	1998	2131.6	2992.1	1553.1	1179.2	1944.1	1701.8	2284.3	2975.7	3301.8
Chloride transport protein 6	O35454	Clcn6	96.9	3	4.82759	4	870	9.59	1140.3	1146.2	1058.7	1046.1	1133.7	1072	1113.2	1085.3	1091.4	1127.2	995.1	1019.3	1078.8	1080.7	1090.9	1028.2
Cholesterol 24-hydroxylase	Q9WVK8	Cyp46a1	56.8	22	54.6	29	500	95.7	3395.8	3466.6	3457	3444.8	3285.5	3238.6	3240.9	3287.9	3313.2	3565.6	3736	3528.5	3279.5	3211.9	3310.3	3260.5
Choline O-acetyltransferase	Q03059	Chat	71.8	2	4.9922	2	641	8.71
Choline transporter-like protein 1	Q6X893	Slc44a1	73	10	15.6202	13	653	40.13	1664.3	1649.1	1689.9	1768.3	1619.9	1664	1699.4	1634	1581.2	1402.6	1381.8	1462.3	1754.3	1841.5	1688.5	1744.1
Choline transporter-like protein 2	Q8BY89	Slc44a2	80.1	6	9.2068	6	706	15.02	813.8	715.1	778.4	734.4	720.2	697.3	717.3	700.7	770.3	729.3	805.1	722.1	736.1	745.7	702.6	713.9
Choline/ethanolamine kinase	O55229	Chkb	45.1	4	11.6751	4	394	5.39
Chondroitin sulfate proteoglycan 4	Q8VHY0	Cspg4	252.2	8	6.0593	8	2327	27.87	424.6	422.1	410	407.2	421.2	413.5	423	405.1	429.6	424.2	449.7	448.3	401.9	416.6	412	437.8
Chondroitin sulfate proteoglycan 5	Q71M36	Cspg5	60.4	11	27.9152	19	566	67.77	4214	4084	4266.5	4109.3	4311.4	4299.3	4081.5	4173.8	4312.5	4742.1	4886.9	4562.6	4110.9	4063	4055.7	3975.4
Chromatin target of PRMT1 protein	Q9CY57	Chtop	26.6	2	7.63052	2	249	3.97	306.9	289.6	286.2	326.3	321.2	321.5	336	319.9	315.9	327.1	378.9	316.5	333.4	299.4	317.1	310.9
Chromobox protein homolog 1	P83917	Cbx1	21.4	5	37.8378	19	185	67.27	428.5	426.5	394.9	397.3	424.4	384.9	428.5	424.6	391.9	456.6	406.5	429.2	401.2	405.6	416	398.6
Chromobox protein homolog 3	P23198	Cbx3	20.8	12	53.0055	29	183	94.31	4241.9	4324	4315.8	4373.3	4541.3	4604	4426.6	4439.2	4474.7	4630.3	4736.6	4737.7	4551.7	4404.2	4411.5	4458.4
Chromobox protein homolog 5	Q61686	Cbx5	22.2	8	39.267	14	191	38	1749.2	1941.9	1870.3	1930.4	1969.4	2021	1884.1	2044.7	1854.3	1857.8	1839	1966.2	1839.9	1903.5	1883.6	2009.5
Chromodomain-helicase-DNA-binding protein 4	Q6PDQ2	Chd4	217.6	13	8.04178	18	1915	39.39	920	985.7	986.5	990.8	923.2	929	941	941.8	1041.6	1008.4	1047.2	1039.4	936.1	914.5	976.6	960.4
Chromodomain-helicase-DNA-binding protein 5	A2A8L1	Chd5	222.4	12	9.71223	16	1946	22.97	183.7	180.9	197.9	188.8	227.1	182.9	175.8	176.3	194.1	201.7	201	331.9	180.1	204	178.3	175.1
Chromodomain-helicase-DNA-binding protein 6	A3KFM7	Chd6	305.2	2	0.479528	2	2711	2.98	393.7	407.8	421.7	403.4	395.1	420.2	382.6	371.2	366.7	388.2	342	377.8	389.7	387.5	381.3	369.8
Chromogranin-A	P26339	Chga	51.8	5	12.959	7	463	26.59	1427.7	1391.3	1368.7	1384.5	1439.9	1423.4	1395.4	1400.5	1383.3	1457.3	1519.9	1443.8	1447	1388.2	1484.9	1485.8
Chromosome alignment-maintaining phosphoprotein 1	Q8K327	Champ1	87.5	4	5.86035	4	802	7.58	398.5	396.3	379.8	381.3	379.9	390.1	391	388.9	393.3	373.4	404.1	368.9	390.4	387.2	383.9	390.5
Cilia- and flagella-associated protein 20	Q8BTU1	Cfap20	22.7	2	10.3627	3	193	7.24	284.5	309.8	286.9	324.1	309.5	290.8	298.5	299.9	299.8	323.1	305.7	298.8	300.9	310.6	291.6	302.9
Cilia- and flagella-associated protein 36	Q8C6E0	Cfap36	39.6	10	41.3994	14	343	48.55	1536.3	1568.5	1550.8	1563.9	1591.7	1571.5	1519.4	1551.2	1595.5	1546.5	1595.9	1551	1590.7	1551	1586.7	1613
Ciliary neurotrophic factor receptor subunit alpha	O88507	Cntfr	40.8	5	22.3118	7	372	29.44	1109.8	1205.2	1143.8	1205.9	1068.6	1053.8	1068.9	1114.6	1135.7	1187.7	1207.6	1101.5	1072.2	1171.7	1082.3	1164.2
Citramalyl-CoA lyase, mitochondrial	Q8R4N0	Clybl	37.5	22	61.5385	38	338	123.98	6564.1	6686.1	6650.5	6674.7	6265.6	6148.1	6170.6	6241.3	6213.7	6195.9	6197.3	6023.3	6162.9	6325.1	6365.1	6475.2
Citrate synthase, mitochondrial	Q9CZU6	Cs	51.7	27	60.9914	135	464	406.35	21238.3	20692	21076.8	20781.8	21210.2	20797.1	21053	21018.7	21144.1	21574.3	21316.8	20384.1	21659.3	21508.4	21208	20903.5
Citron Rho-interacting kinase	P49025	Cit	235.2	21	11.7762	26	2055	63.98	3157.9	3178.5	3155.9	3242.9	3170.1	3264.4	3116.4	3216.8	2991.6	3261.4	3517.1	3203.1	3061.8	3012.2	3143.1	3171.9
C-Jun-amino-terminal kinase-interacting protein 3	Q9ESN9	Mapk8ip3	147.5	32	30.7405	40	1337	113.79	4425.2	4358.8	4432.1	4413.7	4412.1	4497.1	4650.9	4548.7	4470.2	4609	4389.9	4586.7	4406.7	4501.4	4508	4531
C-Jun-amino-terminal kinase-interacting protein 4	Q58A65	Spag9	146.1	28	25.9652	31	1321	99.83	3833.8	3843.6	3830.5	3826.7	3951.5	4005.6	3980.8	3973.9	3885.6	4010.3	3890	4016.9	3877.7	3961.7	3904.2	3898.2
CKLF-like MARVEL transmembrane domain-containing protein 4	Q8CJ61	Cmtm4	22.9	3	25.9615	4	208	18.18	218.3	194.7	216.8	212.4	219.7	208.9	196.4	214.2	203.7	216.7	226.1	181.4	205.6	209.5	193.6	199.2
Clathrin coat assembly protein AP180	Q61548	Snap91	91.8	32	37.5139	111	901	367.82	19287.6	18944.4	19110.2	18557.5	18502.8	18433.9	18497.6	18536.2	18185.1	18667.2	18063.9	17844.5	18440.8	18658.3	18365.9	18310.8
Clathrin heavy chain 1	Q68FD5	Cltc	191.4	132	72.8955	561	1675	1969.99	90071.7	87930.1	90221.3	87457	86191.5	85485.3	85219.5	85875.1	79379.5	81121.8	82368.7	77303	85480.7	87332.1	86990.3	84351.6
Clathrin interactor 1	Q99KN9	Clint1	68.5	19	29.6355	21	631	56.46	2419.1	2472.6	2508.3	2509.1	2539.9	2646.1	2456.2	2543.4	2606.5	2546	2594.9	2660.2	2558.7	2453.9	2575.3	2539
Clathrin light chain A	O08585	Clta	25.6	15	44.2553	39	235	100.66	9630.9	9124.5	9012.4	8643.9	8966.1	9069	8858.5	8876.1	7665.4	7641.4	8206	7314.5	8940.4	8440.2	8526.7	8925.7
Clathrin light chain B	Q6IRU5	Cltb	25.2	14	40.1747	32	229	106.43	7973.6	7318.3	7481.2	7205.3	7529.4	7761.9	7487.1	7356.7	6800.8	6853.6	7534.1	6587.2	7684	7262.4	7301	7608.5
Claudin-10	Q9Z0S6	Cldn10	24.7	2	12.5541	2	231	3	22	23.9	26	29.8	31.9	22.8	24.8	24	26.9	23.6	28.4	31.4	34.7	25.6	26.1	25.3
Claudin-11	Q60771	Cldn11	22.1	4	14.9758	24	207	60.5	5721.2	5640.7	6344.2	7062.4	4815.7	5910.5	6221.9	5826.4	5565.2	4282.7	3982.5	4200	6734.2	6601.6	6229.7	6670.5
Clavesin-1	Q9D4C9	Clvs1	40.6	5	15.8192	6	354	17.18	826.1	850.9	823.1	785.4	802.2	780.3	815.6	795.3	804.6	812.2	771.3	799.1	752.9	758.5	789.2	770.6
Clavesin-2	Q8BG92	Clvs2	37.9	5	19.2661	6	327	20.36	446.9	452.6	454.4	424.4	430.7	443.4	445.7	442.3	456	441.4	429.4	474.3	446.1	420.5	432.9	446.7
Cleavage and polyadenylation specificity factor subunit 3	Q9QXK7	Cpsf3	77.5	2	4.38596	2	684	4.69
Cleavage and polyadenylation specificity factor subunit 5	Q9CQF3	Nudt21	26.2	11	54.6256	14	227	41.75	1781.2	1829.2	1804.5	1793.1	1802.8	1766.5	1757.1	1818.8	1807.5	1876	1909.8	1869.3	1826.5	1784.7	1794.9	1782.7
Cleavage and polyadenylation specificity factor subunit 6	Q6NVF9	Cpsf6	59.1	14	29.2196	22	551	56.55	1668.9	1742.6	1669.1	1724.3	1746.4	1777.5	1715	1697.7	1792.3	1808.8	1893.9	1819.8	1727.4	1688.9	1655.4	1681
Cleavage and polyadenylation specificity factor subunit 7	Q8BTV2	Cpsf7	52	6	13.8004	8	471	17.19	630.7	624.6	660.4	664.6	633.2	662.6	620.9	625	636.6	583.6	673.9	659.7	694.1	623.8	619.5	595.9
Cleavage stimulation factor subunit 2	Q8BIQ5	Cstf2	61.3	9	21.8966	11	580	31.72	1698.3	1718.6	1567.1	1633.4	1640	1657.4	1660.6	1720.8	1688	1603.3	1701.9	1666.4	1627.5	1604	1564.6	1624
Cleavage stimulation factor subunit 2 tau variant	Q8C7E9	Cstf2t	65.8	6	14.2405	6	632	20.4	38.1	37.8	37.3	29.1	44.3	35.8	38.5	33.2	39.9	40.6	44.4	47.1	36.6	41.3	35.1	45.4
Cleavage stimulation factor subunit 3	Q99LI7	Cstf3	82.8	4	9.7629	5	717	14.87	170.9	158.2	180.5	164	183.2	186	173.7	179.6	187.4	184	189.7	185.8	156.3	168.5	180.1	160.8
Cleft lip and palate transmembrane protein 1 homolog	Q8VBZ3	Clptm1	75.2	8	15.8133	9	664	27	830.9	829.8	838	840.6	813	822.2	823.3	851.5	848.2	830.3	827.9	871.7	817	850.3	831.7	817.8
CLIP-associating protein 1	Q80TV8	Clasp1	169.1	32	22.2801	42	1535	117.57	3159.1	3092.2	3086.5	3135.2	3097.3	3092.6	3133.7	3094.8	3249.6	3237.3	3196.7	3369.8	3057.1	3061.4	3087.3	3089.9
CLIP-associating protein 2	Q8BRT1	Clasp2	140.7	55	55.1322	93	1286	287.45	11735.4	11649.5	11600.3	11851.4	11347.5	11395.3	11451.4	11437.6	12158.8	12269.2	11563.8	12606.9	11274.9	11428.4	11468.5	11245.8
Clustered mitochondria protein homolog	Q5SW19	Cluh	148	19	18.7833	19	1315	54.28	1835.3	1809	1845.7	1786.6	1832.1	1819.2	1826.2	1868	1861.7	1849.8	1816.5	1904.1	1798.4	1846.4	1825	1785.5
Clusterin	Q06890	Clu	51.6	18	39.9554	34	448	109.43	4242.1	4248.7	4246.5	4208.5	4067.8	4134.5	4105.9	4198.5	4664.1	4605.4	4589.5	4850.4	4106.9	4098	3983.7	4186.8
C-Maf-inducing protein	Q9D486	Cmip	86.2	2	2.84605	2	773	0	90.7	98.5	86.1	91.3	92.3	105.1	91.7	78.2	95.9	87.6	101.9	86.6	97.6	93.3	87.2	93.2
c-Myc-binding protein	Q9EQS3	Mycbp	12	3	38.835	3	103	7.86	213.3	225.9	226.8	233.6	207.7	207	202.1	216.3	216.9	218.5	223.2	241.5	213.5	217.5	230.5	243.3
Coactosin-like protein	Q9CQI6	Cotl1	15.9	16	88.0282	33	142	84.48	5769.9	6076.2	5685.2	5527.7	5752	5646	6048.5	5875.7	5531.6	5029.2	4902.6	5357.5	6046.5	6132.9	5816.9	5900.1
Coatomer subunit alpha	Q8CIE6	Copa	138.3	41	44.6895	61	1224	197.31	8232.1	8592.8	8489.5	8464.3	8393.5	8269.4	8277.5	8360.2	8920.5	8837.1	8839.8	9304.2	8141.7	8509.1	8571	8497.3
Coatomer subunit beta	Q9JIF7	Copb1	107	25	36.7261	32	953	105.69	4208.5	4421.8	4310.6	4304.4	4324.6	4241.8	4348.1	4279.1	4623.8	4590.6	4550.3	4671.4	4305.7	4375.9	4369.5	4296.5
Coatomer subunit beta'	O55029	Copb2	102.4	21	23.9779	27	905	73.1	3372.4	3491.8	3444.3	3494.6	3453.9	3361.5	3466.1	3426.7	3677.1	3646.9	3704.8	3806.6	3418	3409.9	3496.2	3434
Coatomer subunit delta	Q5XJY5	Arcn1	57.2	19	45.4012	31	511	97.47	4691.7	4779.9	4734.4	4806.6	4937.5	5094.6	4815.9	4957.8	4994	5149.7	5006	5387	4720.9	4796.1	4828.6	4917.4
Coatomer subunit epsilon	O89079	Cope	34.5	10	38.6364	15	308	51.71	1850	1921.7	1914.7	1908.1	1889.9	1845.7	1920.4	1900.3	1993.9	1992.2	2064.2	2017.6	1927.7	1908.9	1900.9	1949.6
Coatomer subunit gamma-1	Q9QZE5	Copg1	97.4	23	44.7368	33	874	104.21	2698.3	2808.6	2692.6	2754.6	2773	2642.4	2677.2	2675.3	2838	2809.9	2942	2936.5	2708.8	2630.7	2776.3	2694.7
Coatomer subunit gamma-2	Q9QXK3	Copg2	97.6	18	32.8358	23	871	61.2	1545.2	1535.6	1630.2	1629.3	1621	1616.6	1659.5	1647.9	1780.5	1687.8	1706.4	1790.4	1577.7	1644.1	1612.9	1572.5
Coatomer subunit zeta-1	P61924	Copz1	20.2	4	27.1186	5	177	13.15	593.6	618.4	647.7	638.9	626.1	607	590.8	636.9	604.1	630.9	579.3	627.4	617.3	624.8	611.3	603.4
COBW domain-containing protein 1	Q8VEH6	Cbwd1	43.7	5	22.1374	5	393	15.84	367.9	357.2	384.4	389.3	391.6	367.4	374.9	365.5	399.3	414.1	400	390.3	376.4	370.1	361.5	396.3
Cofilin-1	P18760	Cfl1	18.5	25	81.9277	128	166	351.57	24636.1	24528.7	24227.1	23991.5	24924	25210.4	25119.5	25574	25395.5	26184.9	25246.7	27062.9	25197.8	25409.8	25222.9	25757.4
Cofilin-2	P45591	Cfl2	18.7	15	75.9036	41	166	108.92	4141.2	4073.1	4241.2	4309	4097.5	4233.9	4150.1	4214.8	4281.8	4448.3	4444.8	4459.3	4192.7	4231.6	4300.9	4495
Cohesin subunit SA-2	O35638	Stag2	141.2	2	2.1121	3	1231	3.43	12.5	15.5	10.9	11.1	17.8	13.2	16.6	14.3	14.9	12.5	16.5	16.8	14.6	13.7	11.7	15.8
Coiled-coil and C2 domain-containing protein 1A	Q8K1A6	Cc2d1a	103.6	10	16.755	11	943	36.58	753.1	813.1	847.8	812.7	790.4	801.9	769.4	839	762.9	797.2	742.9	784.5	791.7	766	762.2	795.7
Coiled-coil and C2 domain-containing protein 1B	Q8BRN9	Cc2d1b	93	5	7.78302	6	848	18.65	407.6	416	409.2	404.6	429.7	441.7	434.5	423.1	427.3	414.3	423.1	437.2	418.1	416.1	459.6	425.7
Coiled-coil domain-containing protein 115	Q8VE99	Ccdc115	19.7	4	35	5	180	10.01	228	213.6	230.3	222.5	244.5	239.8	219.5	235.8	217	231.1	223.4	241.7	233.2	222.9	234.8	234.2
Coiled-coil domain-containing protein 124	Q9D8X2	Ccdc124	25.3	9	35.4839	11	217	36.18	1181.5	1120.8	1119.8	1103.3	1135.7	1139.9	1110.7	1158.4	1101.9	1109.6	1100.1	1129.5	1038.3	1119.5	1105.1	1111.2
Coiled-coil domain-containing protein 127	Q3TC33	Ccdc127	30.5	7	32.6923	9	260	24.05	968.4	999.7	972.4	982.1	972	1037.7	991.4	986	948.9	931.5	908.2	921.3	952	986.5	1035.5	985.2
Coiled-coil domain-containing protein 136	Q3TVA9	Ccdc136	131.8	13	15.1408	18	1136	63.96	1188.2	1169.5	1171.3	1207.8	1233.9	1206.8	1205.7	1175.8	1187.3	1281.3	1324.6	1195.8	1214.9	1163.8	1235.8	1251.4
Coiled-coil domain-containing protein 177	Q3UHB8	Ccdc177	79.8	13	24.9292	16	706	58.68	1409.8	1414.1	1380.4	1380	1423.1	1405.8	1412.4	1388.5	1324	1316.5	1250.3	1275.7	1365.8	1404.2	1392.7	1370.8
Coiled-coil domain-containing protein 22	Q9JIG7	Ccdc22	70.8	18	33.8118	23	627	63.18	1744.5	1775.7	1784.8	1793.2	1903.4	1895.3	1891.6	1896.9	1846.7	1797.6	1834.7	1834.7	1899.7	1853.7	1897	1911.9
Coiled-coil domain-containing protein 25	Q78PG9	Ccdc25	24.5	4	17.7885	4	208	8.55	585.5	546.4	555.7	547	575.6	586.9	592.4	557.2	579.1	575.8	585.5	559	555.5	529.5	539.6	555.5
Coiled-coil domain-containing protein 43	Q9CR29	Ccdc43	25	5	22.973	5	222	11.79	690.4	649.1	642	639.9	672.1	659.5	640.2	661.5	631.7	637.4	611.5	680.8	650.2	695.1	675.3	685.2
Coiled-coil domain-containing protein 47	Q9D024	Ccdc47	55.8	11	30.4348	13	483	35.23	1599.2	1629.1	1517.9	1557.4	1603.4	1537.1	1511.5	1550.4	1733.3	1638.7	1566.6	1633.9	1531.1	1513.3	1535.9	1519.7
Coiled-coil domain-containing protein 51	Q3URS9	Ccdc51	45.1	2	7.14286	2	406	9.06	200.9	201.8	206.3	208.9	198.2	203.1	191.1	205.3	204.8	192	201.2	191.2	198.2	190.1	187.7	199.3
Coiled-coil domain-containing protein 58	Q8R3Q6	Ccdc58	16.7	5	44.4444	6	144	20.44	421.3	417.6	422.6	424.1	419.9	427.8	425	400.8	423.7	418.1	407.9	422	412.3	432.4	422	415.4
Coiled-coil domain-containing protein 6	D3YZP9	Ccdc6	52.9	17	33.9019	22	469	57.94	3514.3	3675.8	3480	3483.2	3533.3	3528.7	3512.1	3486.1	3474	3532.6	3486.7	3568.2	3405.5	3517.6	3451.1	3527.2
Coiled-coil domain-containing protein 85A	Q5SP85	Ccdc85a	54.4	7	15.4	7	500	14.51	229	225.5	226.1	227.8	219.9	214.3	204.4	218.9	211.9	202.5	199.7	214.9	197.3	195.1	199.8	186.6
Coiled-coil domain-containing protein 85B	Q6PDY0	Ccdc85b	22.1	2	6.93069	2	202	4.48	490.2	491.8	452.9	448.4	482.5	469.3	479.4	466.3	456.6	475.8	453.5	472.2	454	478.2	491.9	474.2
Coiled-coil domain-containing protein 85C	E9Q6B2	Ccdc85c	45.3	3	7.38095	3	420	5.05	436.6	434.6	418.1	400.1	446.6	465	415.6	443.7	437.2	432.5	443.1	429	422.2	427.3	440.8	448.5
Coiled-coil domain-containing protein 90B, mitochondrial	Q8C3X2	Ccdc90b	29.6	2	7.8125	2	256	5.51	195.8	185.2	186.5	204.1	193.9	187	184.6	192.3	206.8	187	191.6	195.7	190	205.1	198.3	199.7
Coiled-coil domain-containing protein 91	Q9D8L5	Ccdc91	50	7	15.3846	10	442	17.22	233.3	266.8	263.4	248.1	257.7	274.8	246.6	278.4	245.5	250.3	230.4	230.9	248.9	249.9	246.4	269.4
Coiled-coil domain-containing protein 92	Q8VDN4	Ccdc92	35.2	6	25.7962	6	314	12.84	161	149.8	159.7	138.3	153.7	146.8	150	141.8	161.6	138.7	147.1	152.7	141.8	143.4	143.9	159.9
Coiled-coil domain-containing protein 93	Q7TQK5	Ccdc93	72.6	5	9.22099	5	629	18.29	903	846.1	872.2	887.4	974.2	932.3	924.2	969.8	877.9	921	874.3	929.7	912	959.6	977.9	961.9
Cold shock domain-containing protein C2	Q91YQ3	Csdc2	16.8	2	22.7273	2	154	6.59	168.8	160.8	170.4	176.5	183.3	176.8	175.6	174.3	171.9	169.1	188.3	168.2	160.6	166.8	172.6	177.5
Cold shock domain-containing protein E1	Q91W50	Csde1	88.7	34	40.8521	46	798	147.59	7626.7	7574.6	7493.6	7553.8	7715.3	7702.3	7682.3	7593.9	7958.6	7986.8	7994.4	8212.9	7684.1	7645.9	7668.6	7616.2
Cold-inducible RNA-binding protein	P60824	Cirbp	18.6	8	50.5814	15	172	42.02	1907.5	1855.1	1834.9	1954.3	1869.8	1866.8	1714.5	1753.1	1696.7	1769.6	1991	1891.7	1842.2	1676.7	1850.5	1942.4
Collagen alpha-1(I) chain	P11087	Col1a1	137.9	6	4.88644	10	1453	19.59	1383	1986.3	1278.3	1191	1315.2	1034.5	756	981.3	878.4	1091.7	2323.5	1138.3	1237.4	837.7	1342.5	1263.1
Collagen alpha-1(IV) chain	P02463	Col4a1	160.6	4	3.47513	7	1669	22.51	207	218.7	186.4	198.4	196.4	166.3	189.6	177.5	180.9	193.2	199.6	198.8	187.1	183.7	204.1	195.4
Collagen alpha-1(XVIII) chain	P39061	Col18a1	182.1	3	2.76212	3	1774	7.95	277.4	313.8	278.5	285.1	269.8	244.5	254.1	244.2	268.2	249.8	297.3	267.9	232.7	245.6	252.1	251.4
Collagen alpha-2(I) chain	Q01149	Col1a2	129.5	5	3.42566	10	1372	20.36	1388.6	2065.9	1345.9	1164.9	1365.6	1015.5	764.8	965.9	929.9	1096.9	2498.1	1069.8	1179.1	762.1	1315.8	1251.9
Collagen alpha-2(IV) chain	P08122	Col4a2	167.2	4	2.92912	5	1707	11.1	652.9	637.3	649.8	629.2	659.3	646.7	613.2	643.1	637.3	600	670.8	671.6	646.1	623.7	647.7	639.5
Collagen alpha-2(VI) chain	Q02788	Col6a2	110.3	2	2.32108	2	1034	4.83	218.5	218.6	200.6	198.3	189.1	187.6	177.2	188	187.4	200.4	207.9	191.1	205.2	182.7	203	192.8
Collagen type IV alpha-3-binding protein	Q9EQG9	Col4a3bp	71.1	4	6.73077	4	624	12.61	522.3	509.3	516.6	529.6	555.9	596.1	564.1	549.8	555.3	514.4	576.4	570.9	548.9	547.9	532.3	539.1
COMM domain-containing protein 1	Q8K4M5	Commd1	21	2	19.1489	3	188	9.78	157.3	149	148.2	166.9	152.6	143.6	155	150	158.5	147.4	148.4	151.3	139.6	140.7	152.3	159.2
COMM domain-containing protein 2	Q8BXC6	Commd2	22.8	2	8.54271	2	199	4.6	298	284.5	305	286.4	320.7	313.4	302.4	303.1	309.5	301.5	310.2	313.4	319	315.4	317.8	327.4
COMM domain-containing protein 3	Q63829	Commd3	22	4	25.1282	6	195	16.73	437.8	409.2	416.9	427.2	486.6	420.2	434.3	442.6	424	425.2	438.4	439.3	438.4	441.7	425.5	454.6
COMM domain-containing protein 4	Q9CQ02	Commd4	21.8	2	14.5729	2	199	2.4
COMM domain-containing protein 5	Q8R395	Commd5	24.5	4	24.5536	5	224	13.66	261.3	276.6	269.8	241.7	266.7	278.8	270.5	270	280.2	259.2	280.1	263.9	264.4	255.1	246.1	269.8
COMM domain-containing protein 6	Q3V4B5	Commd6	9.8	4	57.4713	6	87	14.19	376	401.4	424.1	420.8	433.5	424.7	442	432.5	436.3	459.1	443	432.3	435.3	385.4	421.9	443.5
COMM domain-containing protein 8	Q9CZG3	Commd8	20.8	2	19.1257	2	183	3.62	110.9	103	113.6	102.6	99	99.6	107.6	102.8	106.3	110.2	100.8	112.7	105.1	105.3	99.6	103.4
COMM domain-containing protein 9	Q8K2Q0	Commd9	21.8	5	37.3737	5	198	15.58	617.1	571.8	592.8	584.5	631	653.9	674.4	641.8	621.8	628.3	665.1	620	668.7	635.9	641.2	636.6
Complement C1q subcomponent subunit A	P98086	C1qa	26	2	13.8776	2	245	2.75	70.9	77.2	83.7	70.8	80.3	72.9	75	80.8	73.9	79.1	81.2	78	77.2	80.6	70.5	74.5
Complement C1q subcomponent subunit B	P14106	C1qb	26.7	2	7.50988	2	253	5.05	260.8	282.5	243.8	252.4	242.6	243.3	228.6	220	232.3	222.8	234.2	225.7	236.6	243.2	242.5	239.7
Complement C1q tumor necrosis factor-related protein 4	Q8R066	C1qtnf4	35	2	8.58896	2	326	7.25	204.3	186.5	199.9	197.7	202.4	207.4	193.2	207	185.5	199	196.6	202.1	206.9	206	207.4	219.2
Complement C1q-like protein 2	Q8CFR0	C1ql2	29.3	2	14.6341	2	287	2.05	45.2	48.8	37.6	47.9	44.7	45.7	35.6	39.4	40.9	43.8	45.5	41.8	40.9	46.9	40.7	38.6
Complement C3	P01027	C3	186.4	20	14.3716	27	1663	78.58	2020.3	2147.1	2136.7	2041.8	2082.2	1900.2	1909.7	1919.4	2332.1	2148.5	2417.3	2562.9	2031.8	1913.8	1925.9	1927.7
Complement component 1 Q subcomponent-binding protein, mitochondrial	O35658	C1qbp	31	8	43.8849	22	278	87.29	4171.7	4378.6	4263.5	4203.9	4248.2	4305.4	4060.4	4386.5	3873.2	4126.6	3889.8	4024.2	3950.4	4034	4090.4	4168.3
Complement component receptor 1-like protein	Q64735	Cr1l	53.7	2	8.48861	3	483	9.76	77.1	83.4	86.4	75.6	72.5	74.6	78.4	76.8	70.9	74.1	74.1	79.4	71.2	67	72.2	65.8
Complex I assembly factor TIMMDC1, mitochondrial	Q8BUY5	Timmdc1	31.8	4	17.5439	6	285	20.24	580.8	606.1	591	564.9	592.5	579.9	585.9	575.4	582.6	601.3	575.7	594.3	554	545.4	588.3	580.5
Complex I intermediate-associated protein 30, mitochondrial	Q9CWX2	Ndufaf1	37.8	4	13.4146	4	328	6.68	809.4	805.6	793.1	794.1	769.8	763.6	770.9	774.2	770.1	773.4	794.1	769.2	765.1	805.1	810.8	833.7
Complexin-1	P63040	Cplx1	15.1	12	78.3582	75	134	200.27	7641	7253.9	7368.8	7253.7	7539.8	7594.3	7642.9	7290	7482.5	7564.5	7739	7202.4	7955	7608.6	7339.8	7760.9
Complexin-2	P84086	Cplx2	15.4	14	82.0896	66	134	167.56	11605.3	11053.1	11391.7	10677.1	11468.6	11591.1	11553.2	11473.9	11084.3	10636.8	10357.5	10693.9	11753	11571.3	11161.2	11760
Complexin-3	Q8R1B5	Cplx3	17.6	3	13.9241	3	158	7.37	637.9	609.2	588.5	597	593	623.9	559.6	579.5	472.1	601.4	817	508.7	597.1	564	604.7	611.6
Connector enhancer of kinase suppressor of ras 2	Q80YA9	Cnksr2	117.3	36	41.4729	51	1032	167.42	7670	7728.1	7682.8	7417.3	7423.4	7373.2	7771.3	7315.4	7802.2	7481.8	6776.6	7775.8	7432.4	7633.4	7531	7154.7
Conserved oligomeric Golgi complex subunit 1	Q9Z160	Cog1	109	2	1.73469	2	980	4.41	164.5	171.4	151.6	166.3	152.1	142	147.7	149	159.2	147.6	166.6	166.8	149.3	148.5	151.3	139.8
Conserved oligomeric Golgi complex subunit 2	Q921L5	Cog2	82	4	7.52394	4	731	12.16	205.3	204.8	201.6	189.1	211.7	211.9	199.3	209	198.5	200.6	195.3	201.3	194.8	201.3	203.2	209.7
Conserved oligomeric Golgi complex subunit 4	Q8R1U1	Cog4	88.6	2	2.54777	2	785	5.85	275	299.9	304.9	293.9	297.9	291.9	293.3	295.3	301.7	300	279.4	301.8	277.1	277.3	288.4	280
Conserved oligomeric Golgi complex subunit 7	Q3UM29	Cog7	86	4	7.14286	4	770	11.85	192.3	188	191.9	184.6	178.8	167.5	196.3	184.3	188.4	205.5	196.9	196.6	186.8	188.4	186.4	183.5
Consortin	Q8CBC4	Cnst	76.8	2	3.79747	3	711	7.8	122.2	134.6	117.3	121.6	125.7	126.2	120.8	126.4	116.6	114.6	121	124	107.4	116.8	122.1	109.6
Constitutive coactivator of PPAR-gamma-like protein 1	Q6A0A9	FAM120A	121.6	24	25.6295	36	1112	140.63	4119.6	4220.1	4310.7	4302.8	4335.4	4463.6	4310.4	4321	4393.3	4449.8	4427.7	4564.5	4318.5	4216	4396.9	4197.9
Constitutive coactivator of PPAR-gamma-like protein 2	Q8C3F2	Fam120c	119.6	12	15.3071	15	1091	47.58	1422.1	1442.4	1462.5	1486.9	1391.8	1449.2	1366.9	1398.3	1469	1498.7	1524.5	1567.5	1372.1	1414.4	1385.1	1414.8
Contactin-1	P12960	Cntn1	113.3	57	63.9216	213	1020	728.65	29446.6	29185.3	29547.3	29555	29612.6	29820	29782	30074.5	29382.7	29729.6	29392.2	29817.7	29598.9	29620.4	29311.6	28810.3
Contactin-2	Q61330	Cntn2	113.1	21	28.4615	32	1040	105.29	3544.3	3558.7	3615.1	3607.7	3448.3	3506.5	3612.5	3492.7	3231.2	3238.2	3108.5	3243.9	3452	3512.1	3468.3	3649.6
Contactin-3	Q07409	Cntn3	113.2	3	3.50195	3	1028	2.75	166.7	168.7	162.6	180.3	165.7	170.5	161.5	146.7	171.5	166.7	175.1	156.2	163	149.5	151.1	148
Contactin-4	Q69Z26	Cntn4	113.4	5	7.50487	5	1026	16.16	208.8	223.6	219.8	225.6	209.6	226.3	200	236.3	217	221.5	237.7	214.6	206.6	207.4	212.7	231.4
Contactin-associated protein 1	O54991	Cntnap1	156.2	43	41.2996	83	1385	288.59	9322.9	9385.7	9630.7	9619.5	9046.6	9130.7	9350.9	9307.4	8972.6	9005.8	8443.9	8971.2	9097.1	9393.7	9280.1	9365.9
Contactin-associated protein-like 2	Q9CPW0	Cntnap2	148.1	34	30.9309	52	1332	133.63	5947.1	5789.6	5968.1	5980.4	5645.5	5612.9	5743.6	5708.1	5572.5	5611	5404.8	5552.2	5590.2	5685.7	5640.4	5587.7
Contactin-associated protein-like 4	Q99P47	Cntnap4	144.6	3	2.1374	3	1310	5.97	287.8	282.9	272.8	291.2	292.7	275.2	266.8	285.8	283.6	279.8	304.9	266.4	282.3	270.4	298.7	286.5
COP9 signalosome complex subunit 1	Q99LD4	Gps1	53.4	22	46.7091	31	471	108.32	4503.7	4588.9	4389.5	4532.9	4396.3	4383.4	4549.2	4414.5	4378.6	4520.2	4427.3	4464.5	4415.6	4618.7	4591.5	4477.1
COP9 signalosome complex subunit 2	P61202	Cops2	51.6	23	54.4018	39	443	116.71	4502.5	4662.3	4574.8	4642	4361.6	4245.4	4456.7	4381.1	4466.8	4459.5	4405.6	4311	4400.1	4477.6	4430.3	4412.2
COP9 signalosome complex subunit 3	O88543	Cops3	47.8	15	44.9173	29	423	78.2	2967.1	2955.3	3019.6	3107.8	2976.4	2960.2	2985.1	2916.5	3063	3119.6	3085.8	3011.7	3029.8	2989	2960.2	2935.6
COP9 signalosome complex subunit 4	O88544	Cops4	46.3	21	69.7044	39	406	148.8	5315.4	5211.6	5200.8	5323.7	5015.4	5052.4	5204.8	5114.7	5312.4	5265.8	5383.1	5212.2	5316.6	5275.1	5178.2	5239.9
COP9 signalosome complex subunit 5	O35864	Cops5	37.5	16	54.7904	28	334	84.21	2882.6	3001.4	2985.5	2947.8	2796.1	2719.9	2847	2813.4	2915.8	2971.5	2935.6	2887.5	2807.7	2915.9	2830.8	2964.6
COP9 signalosome complex subunit 6	O88545	Cops6	35.9	14	46.9136	23	324	80.01	3798.7	3896.4	3799.5	3919.7	3802.2	3644	3818.1	3763.7	3858.8	3814.2	3963.5	3758.8	3892.6	3843.6	3830	3847.9
COP9 signalosome complex subunit 7a	Q9CZ04	Cops7a	30.2	8	41.0909	10	275	38.98	600.6	593.2	594	602	557.2	571	584.5	568.5	575.1	571.9	567.4	540.9	570.9	573.3	583	590.7
COP9 signalosome complex subunit 7b	Q8BV13	Cops7b	29.7	6	26.8939	10	264	32.78	886.5	861.1	882.7	881.8	932.5	948.9	954.9	944.9	969.9	965.3	955.3	1013.6	930.6	954	948.6	944.4
COP9 signalosome complex subunit 8	Q8VBV7	Cops8	23.2	7	62.201	15	209	54.21	1679.5	1662.3	1743.1	1667.4	1651.3	1692.9	1581.4	1680.8	1607.6	1595.1	1626.2	1557.8	1655.2	1635.1	1611	1569.6
Copine-1	Q8C166	Cpne1	58.8	12	23.1343	18	536	47.38	1514.2	1545.2	1490.6	1445.7	1401.8	1413.8	1419.7	1483.9	1427.7	1395	1401.7	1455.5	1446.8	1505.5	1463.8	1465.3
Copine-2	P59108	Cpne2	61	9	20.8029	18	548	51.23	2018.4	1937.1	1993.1	2040.2	2010.6	1916.4	1858.7	1905.6	2061.8	2054.5	2072.2	1927.9	1986.4	1924	1854.7	1998
Copine-3	Q8BT60	Cpne3	59.5	4	11.6323	7	533	19.88	331.9	394.1	306.3	313.9	318.6	273.2	321.2	305	294	314	322.3	313.1	295.7	283.2	343.9	316.1
Copine-4	Q8BLR2	Cpne4	62.4	24	49.9102	40	557	152.91	5004.7	5038	4971.2	4756.8	4698.4	4781.9	5196.8	4925.1	4989.1	4677.6	4066	4928.7	4834.7	5079	4997.6	4724.5
Copine-5	Q8JZW4	Cpne5	65.6	14	31.0287	17	593	41.78	1268.2	1194.4	1207.5	1372.2	1243.8	1303.7	1220.1	1214.6	1191.4	1249.8	1548.9	1275.2	1271.7	1137.8	1195.7	1146.5
Copine-6	Q9Z140	Cpne6	61.7	38	78.456	106	557	362.08	14854.1	14085.2	14649.1	13681.5	14424.5	14230.2	14793.2	14484.7	15231.2	14235.2	12808	14642.3	14229.7	14721.7	14471.4	13986.2
Copine-7	Q0VE82	Cpne7	61.9	22	46.6786	32	557	96.93	3360.2	3055.6	3278.9	3245.2	3338.5	3176.1	3111.9	3211.6	3239.7	3250.5	3296.9	3158.3	3224.7	3169.5	3105.2	3198.6
Copine-8	Q9DC53	Cpne8	64.6	7	14.7314	9	577	35.63	604.1	619.6	573.5	562	595.3	567.5	597.3	565.9	571.6	564.1	583.4	586.6	570.6	563.4	573.2	589.4
Copine-9	Q1RLL3	Cpne9	61.8	6	13.5624	7	553	15.79	47	47.3	39.2	41.1	50.6	44	61.1	44.4	55	42.2	53	51.7	41.2	40.5	59.3	49.6
Copper chaperone for superoxide dismutase	Q9WU84	Ccs	28.9	3	8.39416	3	274	3.89	287.1	275.2	261	283.7	269.7	274.2	252.2	278.1	257.9	274.5	272.9	264.9	273.2	257.1	272.6	256.5
Copper transport protein ATOX1	O08997	Atox1	7.3	4	58.8235	15	68	56.06	4371.2	4491.7	4465.6	4692.7	4685.4	4980.9	4578	4867.6	5077	4708.4	5406.1	5152.9	5130.2	4607.5	4598.8	5179.8
Cordon-bleu protein-like 1	Q3UMF0	Cobll1	137.3	2	2.35664	3	1273	8.57	47.4	64.3	66.2	57.3	52.4	60	44	60.3	59.8	58.6	54	53.6	48.1	51.6	60.2	53.5
Core histone macro-H2A.1	Q9QZQ8	H2afy	39.7	14	44.086	22	372	84.32	3939.6	3715.7	3871.4	3940.9	3803.6	3992.4	3901.8	3822	4001.6	3808.8	4332.8	3927.1	3752.2	3790.6	3740.4	3710.8
Core histone macro-H2A.2	Q8CCK0	H2afy2	40.1	11	35.7527	16	372	60.99	2146.3	2152.4	2180.7	2156.4	2191.4	2237.2	2150.9	2202	2201.6	2279.3	2622.1	2282.2	2214.5	2133.5	2132.8	2178.4
Coronin-1A	O89053	Coro1a	51	26	61.3883	76	461	230.47	8921.6	8757.6	9031.9	8734.6	8839.2	8806.8	8798	8782.1	8834	8863.2	8645.1	8666.6	8635.4	8758.6	8764.3	8515.5
Coronin-1B	Q9WUM3	Coro1b	53.9	13	36.5702	36	484	114.45	2605.1	2611.1	2628.2	2567	2553.9	2531.8	2551.3	2524.4	2551.6	2549.6	2561.2	2524	2522.7	2629.8	2578	2485.8
Coronin-1C	Q9WUM4	Coro1c	53.1	28	59.2827	67	474	182.97	9893.2	10178.5	10045.3	10026.1	10064.4	9940.3	10105.4	10121.1	9804.8	9918.8	9702.6	9942.8	10039	10218	10246.1	9983.7
Coronin-2A	Q8C0P5	Coro2a	59.5	11	19.4656	13	524	36.45	892.4	865.6	871.2	900.1	854	839.4	826	846	795.8	863.1	886.7	790.8	841.5	843.5	856.1	854
Coronin-2B	Q8BH44	Coro2b	54.9	18	43.3333	34	480	108.34	5152.6	5062.9	5157	5032.4	4953.9	4975	4977.3	4995.2	4739.8	4798.3	4669.2	4610	4972.4	5047	5067.2	5023.6
Coronin-7	Q9D2V7	Coro7	100.7	29	43.6009	40	922	126.58	5419.1	5446.6	5714.5	5376.5	5564.6	5718.5	5545	5873.1	5706.3	5631	5052.4	5916	5511.9	5753.2	5562.9	5548.6
Corrinoid adenosyltransferase	Q9D273	Mmab	26.3	6	33.3333	9	237	26.42	1018.5	1027	1019.2	1049	1032.9	1029.8	1068.4	1043.6	1005	1017.2	1031.4	955.5	966	973	991.9	991.7
Cortactin-binding protein 2	B9EJA2	Cttnbp2	178.7	32	21.2985	41	1648	136.83	4482	4407.9	4439.6	4321.5	4549.6	4418.1	4555.6	4496.5	4644.9	4557.5	4369.2	4726.3	4373.5	4385.6	4337.5	4354.2
Corticosteroid 11-beta-dehydrogenase isozyme 1	P50172	Hsd11b1	32.3	3	8.21918	3	292	2.64	354.6	340.4	368	337.2	337.3	337.5	342.9	350.6	329.8	334.7	317.2	353.1	314.4	345.7	317	311
Corticotropin-releasing factor-binding protein	Q60571	Crhbp	36	6	30.4348	6	322	16.58	763.6	755.9	720.3	739.9	795.1	780.4	771.6	789.2	712.3	750.2	750	735.2	788.2	789.2	783.7	766.3
Costars family protein ABRACL	Q4KML4	Abracl	9	2	27.1605	4	81	12.45	496.3	498.3	487	446.2	455.3	428.5	490.2	468.1	458.1	481.9	428.4	475	499.9	512	505.4	555.7
COX assembly mitochondrial protein 2 homolog	Q8K199	Cmc2	9.4	2	25.3165	2	79	1.74	97.2	92.9	99.4	105.5	101.9	102.7	100	92.1	98.9	92.1	102.3	99.8	92.1	89.8	90.5	77.3
COX assembly mitochondrial protein homolog	Q9CPZ8	Cmc1	12.5	2	17.9245	3	106	7.7	284.2	269	251.5	254.2	283.3	286.9	273.8	265.4	249	258.9	281.8	270.3	286.8	272.1	302.1	276.7
Coxsackievirus and adenovirus receptor homolog	P97792	Cxadr	39.9	6	21.3699	10	365	25.95	1115.5	1152	1153.5	1180.3	1227	1243.4	1215.2	1243.4	1677.2	1726.5	1844.7	2000.5	1268.8	1210.3	1227.7	1264.1
Craniofacial development protein 1	O88271	Cfdp1	32.9	7	26.4407	7	295	22.58	1495.4	1586.5	1461.1	1544.5	1540.8	1548.9	1517.6	1546.3	1541.3	1626.4	1655.3	1589.9	1523.1	1457.7	1534	1503.6
Creatine kinase B-type	Q04447	Ckb	42.7	35	90.8136	462	381	1347.37	39624.6	39123.4	41286.6	40687.8	39541.2	40979.3	39448.7	40206.8	39749	39787.7	41566	38771.4	42293.4	39778.3	39594	41713.6
Creatine kinase M-type	P07310	Ckm	43	5	17.3228	23	381	39.21	1003.4	1013.8	980.7	1023.9	1003.2	1079.7	974.8	1039.6	891.9	928.2	1039.2	943.6	916.4	941.6	975.7	1005.5
Creatine kinase U-type, mitochondrial	P30275	Ckmt1	47	34	68.8995	191	418	525.04	20862.2	20331.9	20924.7	20685.1	21117.2	21077.5	20893.9	20827	19866.5	20166.4	20025.5	19170.1	20259.4	20052.1	20351.2	19730.1
CREB-regulated transcription coactivator 1	Q68ED7	Crtc1	66.9	12	33.9683	19	630	69.44	2019.9	2067	2035.6	1981.3	2027.1	2063.2	2001	2030.5	1928.6	1937.8	1826	1968.4	1901.1	1967	1953.3	1949.6
Crk-like protein	P47941	Crkl	33.8	13	52.1452	18	303	67.95	1970.4	2065.8	1927.2	1959.1	2011.2	2030.8	1970.7	2029	1842.7	1831.5	1891.1	1852.5	1961.8	1968.7	1925	2048.1
CSC1-like protein 2	Q3TWI9	Tmem63b	94.7	5	4.92788	5	832	9.28	830.1	827.9	839.7	826.2	873.3	853.5	845.8	831.1	865.3	891	893.5	927.5	847	852.3	851.1	846.4
C-terminal-binding protein 1	O88712	Ctbp1	47.7	15	46.2585	33	441	99.58	4912.1	4970	4989.1	4908.7	4779.3	4758.5	4677.4	4736.1	4446.2	4515.7	4447	4377.3	4671.7	4655	4715	4715.5
C-terminal-binding protein 2	P56546	Ctbp2	48.9	8	13.2584	20	445	43.38	95.3	90.8	102	95.6	94	88.7	83.8	89.5	69.6	89.1	71.5	80.9	214.5	79.7	136.8	82.3
CTP synthase 1	P70698	Ctps1	66.6	19	33.3333	21	591	60.42	2471.6	2506.7	2529.4	2457	2489.5	2449.7	2518.5	2519.6	2580.7	2621.1	2582.7	2755.9	2471.6	2559.7	2425.6	2491.9
CTP synthase 2	P70303	Ctps2	65.5	6	12.116	6	586	13.02	285.3	275.9	283.2	278.4	302.6	271.4	300	265.5	263.4	264.5	278.9	275.2	275.4	289.8	292.4	296.3
C-type lectin domain family 2 member L	P0C7M9	Clec2l	23.6	5	22.7488	5	211	14.3	874.2	920.7	897.8	892.9	884.4	865.2	885.8	894.7	1005.7	1045.1	997.2	1040.6	834.7	876.7	912.7	874.5
CUB and sushi domain-containing protein 3	Q80T79	Csmd3	405.5	2	0.566496	2	3707	5.07
CUE domain-containing protein 2	Q9CXX9	Cuedc2	31.8	3	11.9718	3	284	5.52	102.5	125.5	111.2	110.1	116.5	112.1	117.6	106.4	112.4	108	106.2	109.2	108.9	128.7	116.7	126.4
CUGBP Elav-like family member 1	P28659	Celf1	52.1	13	24.8971	14	486	34.1	1132.9	1178.1	1187.3	1193.2	1270.8	1222.9	1207.1	1196.6	1284.1	1253.3	1344	1279.9	1282.6	1158.9	1160.8	1161.1
CUGBP Elav-like family member 2	Q9Z0H4	Celf2	54.2	23	43.3071	44	508	120.21	6252.4	6232.6	6038.1	6269.6	6598.1	6601.9	6571.6	6325.9	6652.4	6505.5	7067.5	6801.6	6823.9	6437.9	6382.1	6315.2
CUGBP Elav-like family member 4	Q7TSY6	Celf4	51.9	14	24.4856	19	486	44.93	2116.3	2072.1	2004.6	2036.8	2080.8	2087.8	2108.1	2063.1	2161.2	2119.1	2218	2077.5	2036.5	2026	1973.2	1977.2
CUGBP Elav-like family member 6	Q7TN33	Celf6	48.2	7	11.3043	10	460	25.87	327.1	317.9	300.8	304.2	341.1	323.7	322.7	321.1	290.1	326.5	328.2	327.7	319.7	410.5	316.2	345.8
Cullin-1	Q9WTX6	Cul1	89.6	29	42.5258	37	776	113.66	4427.9	4539.1	4524.5	4415.5	4485.2	4502	4456.2	4490.4	4442.5	4583	4540.8	4661.6	4436.8	4479.5	4615.2	4555.4
Cullin-2	Q9D4H8	Cul2	86.8	25	32.4832	33	745	71.67	3302.4	3445.7	3370.5	3452.4	3324.4	3328.4	3370.5	3370.6	3489.1	3522.1	3539.9	3501.3	3335.4	3319.3	3379.2	3283.4
Cullin-3	Q9JLV5	Cul3	88.9	25	35.6771	38	768	119.09	4345.9	4329.4	4392.3	4383.6	4207.1	4083.2	4238.3	4186.1	4404.6	4356.2	4415	4264.6	4235.4	4192.5	4144.1	4214.4
Cullin-4A	Q3TCH7	Cul4a	87.7	11	17.2596	12	759	38.08	404.1	419.3	431.7	407	411.5	397.1	397.1	390.2	412.3	367.5	410.7	400.1	398.5	406.3	386.2	392.7
Cullin-4B	A2A432	Cul4b	110.6	16	20.3093	17	970	54.12	2445.6	2460.1	2461.7	2515.4	2457.4	2438.2	2404.7	2446	2422.7	2503.3	2438.5	2541.4	2387.4	2494.8	2507.4	2500.4
Cullin-5	Q9D5V5	Cul5	90.9	30	42.6923	40	780	122.07	4177	4191.8	4240	4193.6	4199.5	4033.9	4169.7	4190.9	4154	4244	4068.3	4157.4	4124.8	4206.9	4272.5	4163.2
Cullin-associated NEDD8-dissociated protein 1	Q6ZQ38	Cand1	136.2	69	57.8049	155	1230	489.68	25908.4	26082.2	25629.2	26438.2	24504.6	24388.5	24615.7	24875.5	24822	25589.9	24878.7	24692.7	24851.8	25518.4	25282.5	24672.6
Cullin-associated NEDD8-dissociated protein 2	Q6ZQ73	Cand2	135.5	4	3.56275	6	1235	8.15
CXADR-like membrane protein	Q8R373	Clmp	41.2	2	11.5282	3	373	7.17
CXXC motif containing zinc binding protein	Q8BHG2	Czib	18	6	32.5	8	160	17.56	1126.6	1106.2	1125.9	1133.7	1133.7	1145.9	1137.3	1144.9	1184.4	1152	1215.3	1195.1	1179	1160.2	1115.4	1232
Cyclic AMP-dependent transcription factor ATF-2	P16951	Atf2	52.3	3	11.9097	4	487	10.24	155.7	152.6	158.1	156.2	165	158.3	159.2	154.5	145	150.5	164.7	145.2	145.1	156.4	153.3	152.7
Cyclin-dependent kinase 13	Q69ZA1	Cdk13	164.5	2	0.926539	2	1511	4.37	192.8	183.1	189	181.4	182.8	189.4	189.3	181.3	178.4	189.2	202.4	191.3	184.6	171.3	194.4	192
Cyclin-dependent kinase 14	O35495	Cdk14	53	17	37.5267	19	469	49.44	2110.6	2074.3	2082.3	2059.5	2000.7	2059.4	2016.4	2023.6	2038.5	2020	2077.9	2049.3	2020.6	1974.6	1980.2	2017.2
Cyclin-dependent kinase 16	Q04735	Cdk16	55.9	8	16.7339	8	496	28.27	546.9	528.9	542.2	518.5	516.4	497.2	515.5	483.4	546.5	558.7	541.5	548.6	507.1	524.5	505.5	510
Cyclin-dependent kinase 17	Q8K0D0	Cdk17	59.5	13	24.4742	14	523	46.07	1933.3	1952.4	2044.4	2021.8	2016.1	1989.5	1949.1	1986.5	2036.2	2062.8	2048.3	2076.2	1939.6	1996.1	2001.3	1951.3
Cyclin-dependent kinase 18	Q04899	Cdk18	51.8	9	22.1729	10	451	34.09	237.8	245.6	223.7	246.8	231	254.3	219.7	226.9	229.3	242.4	270.9	231.2	234.9	201	208.9	218.3
Cyclin-dependent kinase 2-associated protein 2	Q9CPY4	Cdk2ap2	13.2	2	14.1732	2	127	3.05	152.3	164.5	161.8	157.7	172.4	153.2	168.3	185	163.2	160.5	178.2	163	162.7	169.5	167	176.2
Cyclin-dependent kinase 5 activator 2	O35926	Cdk5r2	38.9	2	5.96206	2	369	4.86	238.2	251.7	228.9	218.8	238.7	231.1	235.7	263.2	236.8	248.4	255.2	247.9	238.8	208.1	225.9	233.8
Cyclin-dependent kinase 9	Q99J95	Cdk9	42.7	2	5.64516	2	372	4.68
Cyclin-dependent kinase inhibitor 1B	P46414	Cdkn1b	22.2	4	24.8731	5	197	18.15	607.8	621.5	632.5	628.8	656.6	684.4	654.9	632.9	665.1	688.8	683.7	669.1	682.7	653.5	653.7	665.6
Cyclin-dependent kinase-like 5	Q3UTQ8	Cdkl5	105.4	19	23.1343	22	938	54.98	1916.8	2010.5	2039.3	2037.6	1974	2058.3	1925	1995.3	2024	1969.9	1888	2060.2	1878.8	1909.1	1883.8	1857.2
Cyclin-dependent-like kinase 5	P49615	Cdk5	33.3	17	56.8493	32	292	90.27	3075	3073.1	3083.6	3146.6	3068.5	3031.3	3071.5	3102.5	3119.6	3186	3128.9	3122.6	3126.6	3118	3108.9	3101.2
Cyclin-G-associated kinase	Q99KY4	Gak	143.6	32	29.8851	39	1305	123.2	4427	4227.9	4458.1	4299.4	4288.7	4324.3	4242.3	4314.4	4305.8	4325.9	4391	4266.7	4119.2	4211.8	4157	4081.9
Cyclin-Y	Q8BGU5	Ccny	39.4	6	28.4457	14	341	50.04	2003.3	1974.2	1989	1949.5	2076	1953.2	2001.3	1968.2	1910.6	2061.4	1966.7	1973.7	1937.5	1988.9	1968.8	1940.2
Cystathionine beta-synthase	Q91WT9	Cbs	61.5	10	19.9643	14	561	33.65	1857.2	1872.4	1893.6	1864.7	2009	2002.8	2003.3	2043.5	1967.7	1952.4	1980.2	2061.2	1972.1	1964.2	1917	1960
Cystatin-B	Q62426	Cstb	11	4	48.9796	6	98	12.22	552.5	562.6	566.7	581.2	560.5	517.9	515.1	562.1	519.3	540.1	602.2	557.6	541.9	529.4	544.7	569.6
Cystatin-C	P21460	Cst3	15.5	10	65.7143	24	140	82.66	3394.7	3305.4	3486.5	3355.3	3380.6	3522.5	3453	3512.5	3459.7	3494.6	3554	3831.5	3571.7	3484.8	3335.1	3556.7
Cysteine and glycine-rich protein 1	P97315	Csrp1	20.6	13	71.5026	39	193	137.67	7238.5	7630.8	7514.8	7517.1	7181.7	7249	7173.4	7261.1	6337.6	6658.8	6921.3	6208.3	7568.4	7278	7758.5	8163.5
Cysteine and histidine-rich domain-containing protein 1	Q9D1P4	Chordc1	37.3	12	47.432	19	331	65.71	2250.9	2304.9	2244	2289.6	2243.7	2289.8	2295.3	2189	2406.1	2408	2471	2362.7	2348.4	2258.6	2247	2302.9
Cysteine desulfurase, mitochondrial	Q9Z1J3	Nfs1	50.5	21	51.4161	34	459	111.49	3905.6	3844.3	3953.6	3928.6	4122.3	4027.9	4034.6	4010.7	3936	3884.8	3926	3812.2	3805.8	3868.7	3841.6	3888.9
Cysteine protease ATG4B	Q8BGE6	Atg4b	44.3	9	29.2621	12	393	32.42	773	766.1	778.8	781.4	826.2	818	813.7	800.2	791.2	805.9	806.3	810.9	778.9	822.8	808	811.7
Cysteine sulfinic acid decarboxylase	Q9DBE0	Csad	55.1	7	16.2272	8	493	18.97	658.4	677.3	635.6	621.3	601.8	605	585.3	585.2	624.2	620	648.3	648.9	574.5	611	638.2	646.8
Cysteine-rich protein 1	P63254	Crip1	8.5	5	79.2208	5	77	9.78	1089.2	1299.4	1108.2	1073.7	1188	933	850.7	997.8	795.3	890.3	1350.6	998.3	1035	880.1	1164.1	1125.8
Cysteine-rich protein 2	Q9DCT8	Crip2	22.7	13	68.75	33	208	101.7	6051.2	6054.7	5859.1	6137.5	6314	6407	5947.3	6223.5	5932.5	6536.7	7093.6	6695.6	6286.2	5796.9	6330.7	6437.6
Cysteine-rich with EGF-like domain protein 1	Q91XD7	Creld1	45.7	11	27.619	15	420	44.33	2869.6	2875.5	2834.7	2748.1	2648	2729.4	2707.1	2792.4	2906.8	3050.4	2760.5	3070.5	2538.1	2628.1	2692.2	2440.4
Cysteine--tRNA ligase, cytoplasmic	Q9ER72	Cars	94.8	21	30.4452	24	831	68.33	2891.9	2887	2957	3008.7	2975.4	3058.1	2936.5	2984.3	3114.5	3127.2	3224.5	3176.9	3020.1	2869.2	2960.2	2950.9
Cystine/glutamate transporter	Q9WTR6	Slc7a11	55.4	4	8.96414	4	502	13.62	876.3	923.1	964.1	936.1	930.2	897.2	850	953.3	808.4	842.3	858.2	875.4	896.1	1011.4	930.3	859.9
Cytochrome b	P00158	Mt-Cyb	43.2	3	4.19948	7	381	11.9	1953.9	1964.9	1873.9	1895.4	1902.9	1763.4	1885.6	1897.2	1744.1	1834.8	1741.3	1712.1	1880.2	1907.4	1929.6	1909.3
Cytochrome b5	P56395	Cyb5a	15.2	5	36.5672	8	134	25.02	1030	1068	1033.1	1058.7	1034.1	1055.7	1016.8	1053.9	1069.9	1078.7	1099.8	1092.4	1009.8	998	1016.8	1030.6
Cytochrome b5 reductase 4	Q3TDX8	Cyb5r4	59.7	2	4.92424	2	528	3.87	381.4	402.3	414.7	360.9	356.3	367.5	371.2	390.6	401.6	372	347.2	393.5	360.3	365.1	359.1	392
Cytochrome b5 type B	Q9CQX2	Cyb5b	16.3	6	54.7945	7	146	22.26	540.8	644.3	529	556.2	576.8	579.5	546.4	592.8	450.1	439	384.9	432.2	444	523.4	529	484
Cytochrome b-c1 complex subunit 1, mitochondrial	Q9CZ13	Uqcrc1	52.8	24	54.7917	96	480	361.55	12784.9	12400.1	12627.6	12433.8	12951.5	12815.2	12578.7	12769.5	11916.8	11850	11755.5	11283.2	12525.2	12470.8	12718.4	12441.9
Cytochrome b-c1 complex subunit 2, mitochondrial	Q9DB77	Uqcrc2	48.2	29	59.1611	94	453	317.08	13402	13269.6	13266.2	13205.8	13442.7	13178.8	13102.6	13251.4	12556.1	12577	12856.4	12089.3	13166.6	13293.9	13492.7	13264.7
Cytochrome b-c1 complex subunit 6, mitochondrial	P99028	Uqcrh	10.4	4	44.9438	20	89	63.14	2390.8	2490.6	2341.4	2394.4	2477.2	2455.9	2447.9	2484.6	2265.2	2271.7	2247.9	2183.8	2410	2399.4	2429.9	2428.9
Cytochrome b-c1 complex subunit 7	Q9D855	Uqcrb	13.5	18	84.6847	50	111	136.21	8336.3	7848.6	8163	8077.7	8488.1	8323.6	8261.4	8222.5	7824.2	7562.4	8142.8	7367.5	8473.9	8122.7	8221.2	8150.7
Cytochrome b-c1 complex subunit 8	Q9CQ69	Uqcrq	9.8	7	47.561	21	82	56.33	3904.1	3785.5	3777.8	3830.3	3927.2	3994.8	3926.8	3918.6	3657.7	3685	3666.6	3599.5	3842.7	3796.5	3837.3	3684.5
Cytochrome b-c1 complex subunit 9	Q8R1I1	Uqcr10	7.4	4	48.4375	8	64	17.23	1557.9	1885	1688.2	1797.6	1681.9	1561.1	1735.2	1732.1	1592.7	1690.8	1708.2	1643.4	1698	1915.9	1839.2	1908
Cytochrome b-c1 complex subunit Rieske, mitochondrial	Q9CR68	Uqcrfs1	29.3	17	59.4891	62	274	240.43	7894.3	7960.2	7800.7	7583.2	7970.3	7926.8	7788.5	7822.4	7353.5	7166.6	7240.3	6946.4	7638.9	7720.4	7734	7462.2
Cytochrome c oxidase assembly factor 3 homolog, mitochondrial	Q9D2R6	Coa3	12	2	17.5926	4	108	11.48	398.9	420.8	417.4	415.7	388.7	412.6	407.1	422.1	416.8	409.3	387.8	413.4	398.6	424.1	435.3	411
Cytochrome c oxidase assembly factor 5	Q99M07	Coa5	8.4	2	37.8378	2	74	7.91	50.1	63	51.4	49.6	53.9	64.2	56	56.4	49.3	57	57.8	57.1	56.3	53.1	55.5	52.2
Cytochrome c oxidase assembly factor 6 homolog	Q8BGD8	Coa6	9.3	2	35.443	3	79	9.71	216.7	206.7	216.3	192	192.3	213.6	190.9	200.2	207.3	218.1	209.8	219.7	216.2	198.5	205.7	211.3
Cytochrome c oxidase assembly factor 7	Q921H9	Coa7	25.6	12	57.5758	17	231	40.13	2435	2399.6	2497	2443.2	2543.3	2523.1	2536.1	2571.2	2652.5	2679.4	2633.8	2824	2444.2	2559.6	2579	2565.4
Cytochrome c oxidase assembly protein COX15 homolog	Q8BJ03	Cox15	45.8	2	6.2954	4	413	6.88	268.8	238.9	209.8	188.6	226.7	191.6	227	208.7	192.3	231.8	176.5	226.6	195.3	234.2	272.7	229.2
Cytochrome c oxidase assembly protein COX18, mitochondrial	Q8VC74	Cox18	36.3	3	9.36556	3	331	6.52	302.1	347.4	290.3	290.2	295.2	278.3	262.6	286.3	284.2	295.6	284	290.3	267.8	287.8	308	276.9
Cytochrome c oxidase subunit 2	P00405	Mtco2	26	8	30.837	47	227	153.76	6329.4	6221.2	6419.1	6316.2	6487.8	6541.1	6452	6421.6	6435.7	6390.3	6459.1	6149.6	6495.2	6354.3	6408	6114.9
Cytochrome c oxidase subunit 4 isoform 1, mitochondrial	P19783	Cox4i1	19.5	16	68.6391	57	169	154.21	9573.7	9910	10272	10146.4	10179.5	11031.4	10184.1	10344.4	10289.5	9657.5	9965.6	9686.8	10114.9	9652.2	9785.2	9662.3
Cytochrome c oxidase subunit 5A, mitochondrial	P12787	Cox5a	16.1	13	63.0137	73	146	221.84	13006.9	12660.7	12714.5	12973.5	13556.8	13695.8	13255.2	13483.3	12614.6	12644	12749.4	12345	13145.2	13030.3	13120.4	13030.1
Cytochrome c oxidase subunit 5B, mitochondrial	P19536	Cox5b	13.8	9	42.9688	63	128	168.61	10968.2	10485.7	10804.4	10715.8	11357.4	11567.5	11323.4	11402.8	10901.9	10923.7	10889.8	10573.3	11210.3	11078.4	11158.3	10926.1
Cytochrome c oxidase subunit 6A1, mitochondrial	P43024	Cox6a1	12.3	2	40.5405	19	111	86.22	2058.9	2019.3	2047.3	2004.6	2152.6	2049.1	1990	2095.4	1997.6	2046.7	2094.3	1944.9	2058	2041.9	1988.2	1989.4
Cytochrome c oxidase subunit 6B1	P56391	Cox6b1	10.1	9	70.9302	41	86	102.66	5427.6	5297.3	5228.7	5200.1	5493.6	5438.7	5354.2	5368.7	5231.5	5128.6	5703.3	5108.3	5629.2	5281.6	5329.7	5432.4
Cytochrome c oxidase subunit 6C	Q9CPQ1	Cox6c	8.5	8	48.6842	29	76	66.25	8796.7	7996.7	8437	8370.8	9089.5	9286.1	9040.8	8844	8592.6	8890.2	8727.5	8557.7	9295.9	9267.5	9311.9	8651.8
Cytochrome c oxidase subunit 7A2, mitochondrial	P48771	Cox7a2	9.3	3	30.1205	11	83	38.25	2313.1	2351.5	2418.4	2331.7	2452.9	2297.3	2319.5	2348.6	2416.3	2558.4	2382.5	2364.8	2447.1	2441.5	2476.9	2473.5
Cytochrome c oxidase subunit 7A-related protein, mitochondrial	Q61387	Cox7a2l	12.4	5	62.1622	10	111	39.34	2014.2	1985.1	2008.5	2006	1990	1943	1981.2	1981.4	1835.7	1982.6	1860.5	1798	1940.7	1973.1	2137.5	1968.5
Cytochrome c oxidase subunit 7C, mitochondrial	P17665	Cox7c	7.3	3	38.0952	10	63	22.01	1820.2	2084.8	1800	1833.3	1932.1	1799.4	1863.5	1923.6	1662.7	1887.8	1704.7	1751.3	1771.4	2058.3	1933	1875.6
Cytochrome c oxidase subunit NDUFA4	Q62425	Ndufa4	9.3	8	56.0976	26	82	65.56	5873.6	5622.1	5692.4	5820.1	5784.5	5651.1	5634.1	5794	5490.4	5672.7	5365.9	5386.2	5453	5750.9	5857.9	5579.8
Cytochrome c, somatic	P62897	Cycs	11.6	16	72.381	68	105	205.13	15715.8	15799.2	14513.1	13918	15260.3	14873.1	14759.6	15046.1	16105.8	13024.3	15973.3	13581.2	15068.5	15458	14440.4	15928.7
Cytochrome c1, heme protein, mitochondrial	Q9D0M3	Cyc1	35.3	14	55.0769	64	325	203.5	8267.8	8107.6	8304.8	8408.8	8504	8518.6	8395.1	8284.2	7966.8	8110	8030	7785	8470.6	8398	8523	8113.8
Cytochrome c-type heme lyase	P53702	Hccs	31	13	56.25	17	272	60.24	1778.3	1747.6	1749.5	1778.7	1805.7	1824.8	1839.6	1879	1927.8	1943.4	1896.2	2027.6	1761.5	1844.2	1850.7	1821.3
Cytochrome P450 2D11	P24457	Cyp2d11	57	3	5.55556	4	504	9.27	287.4	298.3	312.1	300	295.1	265.2	297.8	291.4	302.5	295.3	280.1	322.4	294.3	285.4	261.3	280.8
Cytochrome P450 2D26	Q8CIM7	Cyp2d26	56.9	2	5	2	500	2.36
Cytoglobin	Q9CX80	Cygb	21.5	7	37.3684	7	190	14.69	848	896.8	888	889.2	855.1	863.8	823.3	847.1	826.7	833	884.6	863.5	837.6	815.1	841.7	835.3
Cytohesin-1	Q9QX11	Cyth1	46.2	7	19.3467	8	398	20.97	612.7	619.5	618.1	596.7	619.1	612.7	647.3	614.8	630.5	660.3	625.6	648	640.4	608.2	659.2	613.1
Cytohesin-2	P63034	Cyth2	46.6	9	26.5	10	400	36.27	1630.5	1600.8	1603.1	1612.2	1571.9	1622.4	1642.6	1639.6	1573.9	1635.9	1593.1	1674.3	1546.8	1622.2	1629.5	1631.1
Cytohesin-3	O08967	Cyth3	46.2	9	28.3208	10	399	20.19	920.9	890.1	886.8	856.7	897.8	855.5	887	833.6	927.9	883.7	919.7	901.4	873.5	840.7	854.3	834.7
Cytoplasmic aconitate hydratase	P28271	Aco1	98.1	35	49.8313	67	889	223.7	6507.2	6476.4	6490.4	6505.3	6587.8	6502.8	6478	6569.4	7172.2	6872.2	7197.2	7190.8	6576.8	6440.4	6486.9	6618.4
Cytoplasmic dynein 1 heavy chain 1	Q9JHU4	Dync1h1	531.7	298	63.932	622	4644	2027.5	85975	86980.2	87014.7	88224.2	83941	84237.6	85961	85528.1	88707.5	90794.5	88020.8	90324.6	86165.6	87326.5	87470.3	86434.5
Cytoplasmic dynein 1 intermediate chain 1	O88485	Dync1i1	70.7	21	43.7898	37	628	158.43	5358	5248.9	5330.8	5406.2	5201.8	5370.3	5450.1	5285.8	5493	5338.8	5559.1	5418.6	5435.7	5214.6	5154.1	5283.6
Cytoplasmic dynein 1 intermediate chain 2	O88487	Dync1i2	68.4	18	41.1765	28	612	120.59	3914.9	3990.4	3970.3	4144.6	3879.2	4094.8	4004.4	3941.5	4134.4	4079.2	4137.1	4156.5	4048.4	3891.8	4002.4	3973.2
Cytoplasmic dynein 1 light intermediate chain 1	Q8R1Q8	Dync1li1	56.6	30	62.7151	49	523	160.09	7046	7105.3	7132.8	7251.8	7097.6	7254.2	7072.1	7239	7290.9	7364.5	7283.1	7467.8	7111.8	7186.4	7043.6	7141.8
Cytoplasmic dynein 1 light intermediate chain 2	Q6PDL0	Dync1li2	54.2	24	60.1626	35	492	115.3	4339.3	4309.3	4364.5	4448.7	4415.2	4512.9	4392.8	4432.5	4418.8	4483.9	4427.4	4604.8	4248.3	4469.2	4497.5	4482.1
Cytoplasmic dynein 2 heavy chain 1	Q45VK7	Dync2h1	492	4	1.57919	8	4306	5.87	1190.8	1132.1	1095.7	1074.8	1026.6	975.1	1051.4	1045.4	1126.6	1213.4	1135.4	1183.4	1061.4	1133.6	1134.4	1125.4
Cytoplasmic FMR1-interacting protein 1	Q7TMB8	Cyfip1	145.1	41	33.759	74	1253	207.4	1946.9	2036.1	2090.1	2092.8	1991	2022.2	1983.9	1994.6	2085.3	1987	1969	2078.1	1954	1980.8	1969.5	1930.8
Cytoplasmic FMR1-interacting protein 2	Q5SQX6	Cyfip2	145.6	61	52.6736	101	1253	309.95	11850.3	12425.8	11909.1	11721.5	11608.2	11168	11821.8	11585.5	12249.2	12605.7	11594.8	12414.1	11669.6	12224.6	11978	11438.6
Cytoplasmic phosphatidylinositol transfer protein 1	Q8K4R4	Pitpnc1	38.4	11	46.6867	17	332	49.1	2178.2	2218.9	2231.9	2284.5	2317.5	2330.3	2249.8	2308.5	2421	2380	2504.5	2473.1	2293.4	2305.1	2282.8	2326.3
Cytoplasmic polyadenylation element-binding protein 2	Q812E0	Cpeb2	58.4	8	19.3858	8	521	25.15
Cytoplasmic polyadenylation element-binding protein 3	Q7TN99	Cpeb3	78.3	10	16.4804	10	716	30.53	1166.3	879.3	1044	1137.5	1101.4	999.9	1085.6	975.9	965.3	1081.3	1025.1	1100.7	925.2	1026.7	964.2	1041.8
Cytoplasmic polyadenylation element-binding protein 4	Q7TN98	Cpeb4	80.1	6	13.0316	6	729	20.23	168.6	167.8	170	167.5	172	174.3	178.5	182.1	179.5	186.8	178.7	195.8	171.3	167.6	161	158.6
Cytoplasmic protein NCK1	Q99M51	Nck1	42.9	3	7.95756	4	377	10.52	290.6	305.9	297.5	294.2	313.2	281.5	299.5	293.8	285	293.3	286.6	291	276.6	295.6	291.8	308.1
Cytoplasmic protein NCK2	O55033	Nck2	42.9	12	31.8421	15	380	38.33	2185.9	2208.5	2233.4	2181	2223.6	2182.8	2252.2	2191.2	2187.4	2176.3	2123.4	2212.5	2166.3	2245.2	2217.5	2223.6
Cytoskeleton-associated protein 4	Q8BMK4	Ckap4	63.7	32	60	48	575	140.45	4816	4968	5057.1	5013.9	5296.1	5276.4	5204.9	5208.3	5601.9	5715.8	6147.8	6041.9	5201.4	5154.7	5229.1	5171.9
Cytoskeleton-associated protein 5	A2AGT5	Ckap5	225.5	67	38.0906	102	2032	295.39	12269.9	12445	12550.3	12626.6	11908.4	12060	12189.5	12180.8	12527.3	12667.4	12273.8	12733.4	11921.5	12127	11991.8	11985.2
Cytosol aminopeptidase	Q9CPY7	Lap3	56.1	27	72.6397	54	519	199.44	8978.9	8698.4	9025.2	9277.1	8663.8	8955.7	8886.1	8921.3	8627	8503.1	8571.2	8509.7	8854.7	8798.4	8836	8973.8
Cytosolic 10-formyltetrahydrofolate dehydrogenase	Q8R0Y6	Aldh1l1	98.6	57	77.4945	104	902	359.39	12016.9	11996.3	11669.6	11947.9	12200.1	12109.9	12091.8	12093.9	11882.8	12474.2	12826.3	11970.7	12065.3	11646.1	12219.1	12049.9
Cytosolic 5'-nucleotidase 1A	A3KFX0	Nt5c1a	40.7	2	8.49315	2	365	4.34	290.3	311.2	330.5	312	287.6	311.9	299.5	286.1	291	269.9	308.8	268.2	318.3	288.1	303.5	281
Cytosolic 5'-nucleotidase 3A	Q9D020	Nt5c3a	37.2	6	20.8459	6	331	14.5	526	508.4	482.3	480	503.8	488.6	462	511.3	516.7	514.7	525	528.9	481.1	514.5	475.4	522.4
Cytosolic acyl coenzyme A thioester hydrolase	Q91V12	Acot7	42.5	22	51.9685	84	381	279.27	12880.5	12406.3	12443.1	12362.5	12389	12456.3	12745.1	12436	13020.9	13148.6	13242	13021.4	13125.9	12924.8	12744.6	12918
Cytosolic arginine sensor for mTORC1 subunit 2	Q8CAB8	Castor2	36.1	3	20.0608	3	329	7.74	131.1	123.6	134.1	147.7	128	122.4	135.2	131.6	142.6	157.6	161.4	136.8	153.7	128.4	135.3	150.4
Cytosolic endo-beta-N-acetylglucosaminidase	Q8BX80	Engase	82.9	2	3.67847	2	734	5.94	32	37.6	31.8	31	29	25	36.5	25.7	27.2	38.6	29.5	26.9	28.8	30.1	32.6	28.4
Cytosolic Fe-S cluster assembly factor NUBP2	Q9R061	Nubp2	29.5	2	11.6364	3	275	10.51	263.2	260.3	276.2	262.4	269.1	258.7	276.2	259.8	264	251.7	283.3	277.6	267.1	251.9	259.4	266.1
Cytosolic non-specific dipeptidase	Q9D1A2	Cndp2	52.7	30	71.1579	72	475	226.35	8398.4	8364.7	8474.1	8629.8	8453	8443.3	8479.7	8373.6	8657.8	8373.8	8431.3	8599.7	8490.9	8398.7	8381.4	8517.5
Cytosolic purine 5'-nucleotidase	Q3V1L4	Nt5c2	64.8	9	20.5357	11	560	28.37	1925.6	1929.2	1966.9	1984.3	1957	1924.8	1950.2	1873.2	1876.1	1896.2	1935.7	1878.5	1917.4	2004.6	1977.6	1998.9
Cytospin-B	Q5SXY1	Specc1	118	33	35.5201	40	1067	123.71	5524.8	5479.8	5464.3	5446.8	5667.6	5628.9	5744.6	5591.9	5454.1	5441.1	5100.4	5642	5570.9	5567.9	5560.9	5491.7
D-2-hydroxyglutarate dehydrogenase, mitochondrial	Q8CIM3	D2hgdh	58.5	9	25.4206	11	535	38.88	704.2	722.9	703	726.4	711.3	693	668.5	719.9	692.1	681.9	670	669.8	695.7	686.8	654.8	653.9
D-3-phosphoglycerate dehydrogenase	Q61753	Phgdh	56.5	21	45.9662	58	533	209.75	9599.7	9291	9564.8	9844	9351.8	9345.4	9453.7	9273.4	9330.8	9363.8	9146.4	9268.2	9413.2	9314.4	9521.3	9607.5
Damage-control phosphatase ARMT1	A6H630	Armt1	50.5	10	28.9294	11	439	36.17	1468.4	1487.3	1486.7	1457	1481.7	1431.5	1503.3	1459.7	1418.6	1426.2	1372.2	1401.4	1440.4	1464.4	1451.9	1470.2
D-aminoacyl-tRNA deacylase 1	Q9DD18	Dtd1	23.4	6	35.4067	11	209	41.27	1026	1062.2	1044.7	1061	1059.4	1102.6	1069.3	1041.6	943	933.6	982.2	987	1026	1025.4	959.9	1068.3
D-aminoacyl-tRNA deacylase 2	Q8BHA3	Dtd2	18.2	3	19.6429	3	168	7.33	525.8	516.6	518.8	515.7	534.6	504.5	519	506	508.2	528.4	500.3	524.8	491.1	500.5	527	502.6
DAZ-associated protein 1	Q9JII5	Dazap1	43.2	10	36.9458	16	406	58.63	1778.1	1767.6	1734.6	1804.7	1838.8	1796.7	1731.2	1785.9	1848.4	1887.1	1975.4	1931.8	1801.6	1788.5	1803.7	1841.1
D-beta-hydroxybutyrate dehydrogenase, mitochondrial	Q80XN0	Bdh1	38.3	20	61.516	49	343	151.83	7803.1	7839.1	8154.4	8015.3	8628.7	8689.1	8597	8715.9	10476.6	10843.3	10138.5	11527	8454.5	8759.5	8579.3	8396.3
DBH-like monooxygenase protein 1	Q9CXI3	Moxd1	69.6	2	5.70962	2	613	6.2	195.6	206.2	197.6	209.6	216.6	221.6	195.3	197	197.3	213.3	209.8	224.4	204.9	199.9	199.4	214.3
DBIRD complex subunit ZNF326	O88291	Znf326	65.2	5	10	7	580	7.32	300.6	296.1	290.5	293.9	322.6	307.5	276.4	313.7	297.9	317.2	333.2	321.6	303.7	281.1	288.9	274.5
DCC-interacting protein 13-alpha	Q8K3H0	Appl1	79.3	29	50.495	39	707	129.43	4957.2	4966.5	4912.4	4995.7	4961	4885.1	4870.2	4892.9	4820.2	4877.4	4935.1	4905.1	4937.6	4878.5	4954.8	4959.8
DCC-interacting protein 13-beta	Q8K3G9	Appl2	73.8	17	39.577	18	662	62.91	2050.8	2058	2068.1	2043.9	2096	2055	2097.3	2100	2066	2094.6	2087.3	2076.2	2060.1	2103.1	2023.3	2103.8
DCN1-like protein 1	Q9QZ73	Dcun1d1	30.1	5	22.0077	8	259	24.52	1753.8	1729.2	1702.8	1745.4	1665.6	1744.2	1690.1	1754.8	1767.8	1799	1719.9	1735.1	1733.5	1730.1	1644.3	1641.1
DCN1-like protein 2	Q8BZJ7	Dcun1d2	30	4	16.2162	6	259	21.46	869.9	873.7	889	909.7	851.3	863.4	855.5	843.2	806.9	827.8	821.6	855.6	824.6	856.7	887	881.2
DCN1-like protein 3	Q8K0V2	Dcun1d3	34.4	2	9.86842	2	304	7	75.5	68.4	91.2	81	98.6	94.1	83.1	74.2	81.7	79.4	83	79.2	78.2	78	74.4	70
DDB1- and CUL4-associated factor 7	P61963	Dcaf7	38.9	6	20.7602	10	342	31.96	667.2	667.2	668.7	707.9	678	657.6	640.8	632.6	674.6	661.6	677.6	648.6	638.8	603.5	617.1	655.3
D-dopachrome decarboxylase	O35215	Ddt	13.1	7	72.0339	12	118	48.69	3111.1	3141.2	2899.7	2773.5	2394.8	2412.2	2601.3	2677.5	2831.2	2139.1	3164.8	2089.3	3170.8	3161.4	2277.5	2820.6
DDRGK domain-containing protein 1	Q80WW9	Ddrgk1	36	5	24.7619	7	315	17.92	260.1	280.6	277.8	272.2	255.2	271.9	248.9	275.1	278.7	278.6	253	254.1	234.6	244.6	255.1	254.9
Deaminated glutathione amidase	Q8VDK1	Nit1	35.7	9	36.2229	11	323	31.39	740.8	710.9	713.7	691.6	715.1	716.2	692.7	721	722.1	830.9	820.9	720.1	760.7	706.5	731	718.2
Death-associated protein 1	Q91XC8	Dap	11.1	2	15.6863	2	102	2.56	131.8	148.1	139.6	131.4	138.8	130.9	135	128	144.5	127.5	137.8	130.4	131.5	123.2	128.3	121.5
Dedicator of cytokinesis protein 1	Q8BUR4	Dock1	214.9	4	1.76944	5	1865	6.56	304.9	302.2	283.9	285.1	294.2	281.9	295.8	298.3	273.4	286.2	266.3	259.5	259.4	272	269.7	295
Dedicator of cytokinesis protein 10	Q8BZN6	Dock10	245.6	9	5.48837	11	2150	28.79	969.6	972.6	920.2	914.8	910.9	859.5	908.6	858.4	817.4	782.7	707.7	743	849.7	891.7	886.8	859.8
Dedicator of cytokinesis protein 11	A2AF47	Dock11	237.6	3	1.54366	3	2073	8.29	91	97.8	80.3	82.6	88.8	87.5	81.3	87.5	88.8	91.4	81.2	89.2	83.1	92.7	78.5	94.8
Dedicator of cytokinesis protein 3	Q8CIQ7	Dock3	232.8	17	8.83078	19	2027	46.26	1403.7	1389.8	1371.6	1390.5	1355	1348.6	1351.3	1312.1	1360.6	1374.8	1387	1392.6	1351.8	1330.7	1327.8	1338.5
Dedicator of cytokinesis protein 4	P59764	Dock4	226.4	48	27.907	67	1978	187.9	7358.4	7485.6	7459.2	7307.2	7319.6	7289.4	7655.5	7449.3	7731.4	7465.3	6853.6	7849.9	7239.6	7495.7	7324.3	7277.4
Dedicator of cytokinesis protein 7	Q8R1A4	Dock7	241.3	7	4.46009	8	2130	26	464.4	438.3	473.4	455.3	461	466	465.5	440.3	462.3	463.1	487.6	466.6	441.4	474	465.8	476.1
Dedicator of cytokinesis protein 9	Q8BIK4	Dock9	235.2	23	15.7178	32	2055	89.74	2535	2611	2592.1	2496.2	2502.7	2505.6	2517.2	2542.8	2559.6	2579.6	2424.3	2597.7	2439.6	2466.8	2442.9	2397.9
Dehydrogenase/reductase SDR family member 1	Q99L04	Dhrs1	34	17	64.2173	25	313	74.07	3168.8	3229.5	3214.3	3281.2	3238.2	3317.8	3310.1	3373.5	3157.1	3187.8	3043	3260.7	3227.6	3215.5	3352	3248.6
Dehydrogenase/reductase SDR family member 4	Q99LB2	Dhrs4	29.9	9	41.9355	13	279	43.55	1560.1	1622.1	1644.3	1691.5	1672.2	1593.8	1599.3	1577.3	1540.1	1542.4	1553	1493.2	1550.1	1555.2	1618.1	1547.8
Dehydrogenase/reductase SDR family member 7	Q9CXR1	Dhrs7	38.1	6	17.4556	7	338	20.35	524.8	549	575.8	550.8	520.3	536.1	527.1	545.3	557.7	563.6	537.6	582.5	516.8	505.6	513.6	537.5
Dehydrogenase/reductase SDR family member 7B	Q99J47	Dhrs7b	35	9	28.483	10	323	31.53	1485.4	1488.7	1494.5	1513.1	1507.5	1532.4	1489.4	1509.4	1537.4	1483.4	1451.5	1517.6	1461.3	1530.2	1521.8	1468.3
Delta(3,5)-Delta(2,4)-dienoyl-CoA isomerase, mitochondrial	O35459	Ech1	36.1	12	47.7064	17	327	48.41	1588.8	1684.9	1620.1	1663.7	1548.1	1525.1	1522.2	1534.5	1557.6	1609.1	1686.7	1649.5	1548.2	1500.2	1617.6	1572.3
Delta-1-pyrroline-5-carboxylate dehydrogenase, mitochondrial	Q8CHT0	Aldh4a1	61.8	17	27.758	24	562	52.46	4101.8	4227.5	4020.3	4036.2	4181.6	3895.2	3821.1	3824.3	3922	4074.3	4505.7	4008.3	3898	3788.4	4064	4093.2
Delta-1-pyrroline-5-carboxylate synthase	Q9Z110	Aldh18a1	87.2	13	18.4906	17	795	48.37	1714.3	1690.8	1709.3	1665.1	1681.3	1696.3	1689.1	1658.7	1661.3	1743.2	1740.9	1744.4	1619.3	1620.5	1617.2	1563.8
Delta-aminolevulinic acid dehydratase	P10518	Alad	36	11	51.2121	25	330	101.74	2528.4	2642.4	2534.4	2623.2	2503.7	2452.7	2555.2	2424.5	2390.9	2362.5	2559.5	2311.3	2606.5	2523.6	2449	2613.4
Dematin	Q9WV69	Dmtn	45.4	22	57.5309	47	405	137.1	7085.3	7088.8	7179.8	7141.8	7330.9	7722.7	7504.8	7472	7159.6	7132.1	6935.1	7227.9	7414.6	7345.7	7317.6	7296.4
Dendrin	Q80TS7	Ddn	76.4	5	9.01408	5	710	13.94	555.1	584.1	568.6	549.7	567.8	529.8	562.8	537.8	542.9	552.7	538.3	564.7	566.3	561.8	566.7	543.3
DENN domain-containing protein 1A	Q8K382	Dennd1a	111.5	4	4.52756	5	1016	13.83	244.8	256.5	243.7	254.6	228.6	247.9	255.5	245.7	263.8	245.9	250.4	255.1	242.5	255.2	237.8	243.9
DENN domain-containing protein 4B	Q3U1Y4	Dennd4b	164.6	2	2.60173	2	1499	6.75	228	286	343.3	312.3	275.7	344.5	291	274.8	341.4	252.8	302.9	268.6	252.8	250.8	226.5	241.1
DENN domain-containing protein 5A	Q6PAL8	Dennd5a	146.6	4	3.885	4	1287	9.23	125.2	138.3	118.7	131.8	116.8	116.9	118.6	112.6	135.2	126	129.3	119.1	126.5	111.6	122.4	115
DENN domain-containing protein 5B	A2RSQ0	Dennd5b	144.5	5	7.29984	5	1274	15.17	322.2	316.2	337.9	336.4	340.6	312.7	328	319.4	317.9	327.7	339.8	320.4	319.5	318.8	321.3	304.5
Density-regulated protein	Q9CQJ6	Denr	22.2	9	50.5051	14	198	50.37	2210	2250.9	2279.5	2361	2372.8	2377.5	2322.6	2396.1	2340.6	2403.7	2259.2	2512.7	2323	2369.3	2398.3	2428.9
Deoxyguanosine kinase, mitochondrial	Q9QX60	Dguok	32.3	2	14.4404	2	277	10.52	28.9	25.8	26.7	22.7	27	27	24.7	22.2	30.1	23.4	29.6	28.8	26.6	28	22.1	23.8
Deoxyhypusine hydroxylase	Q99LN9	Dohh	32.9	3	18.8742	3	302	17.44	220.2	235	219.4	223.5	209.1	225.1	223	230	238.3	226.3	241	241.6	220.5	221.8	232.4	232.1
Deoxyhypusine synthase	Q3TXU5	Dhps	40.6	3	12.1951	3	369	10.76
Deoxynucleoside triphosphate triphosphohydrolase SAMHD1	Q60710	Samhd1	75.8	3	5.77508	4	658	5.86	107.7	107.8	121.5	113.2	109.9	105.9	95	98.6	106.6	111.5	94.4	111.3	100.1	111.1	111.3	110.3
Dephospho-CoA kinase domain-containing protein	Q8BHC4	Dcakd	26.5	9	42.4242	12	231	39.27	1289.3	1300.3	1293.3	1286	1408	1332.7	1305.3	1361.8	1482.3	1512.7	1379.6	1686.7	1276.1	1393.5	1338.5	1351.3
Derlin-1	Q99J56	Derl1	28.8	2	7.56972	2	251	5.1	131.2	150.1	141.1	131.5	144.4	124.4	139.8	137.8	128.4	135.4	128.3	152.2	144.2	156.1	151.1	135
Desmin	P31001	Des	53.5	6	15.3518	10	469	27.05	146.6	169.2	148	139.9	168.2	142	149.4	144.9	143.8	161.6	180.2	164.4	150.9	144.3	157.3	180.2
Destrin	Q9R0P5	Dstn	18.5	22	80	75	165	202.65	11489.7	11707.6	11397.9	11204.2	11483.8	11149.1	11429.5	11488	11626.5	11796.9	11386.2	11902.2	11615	11533.5	11862.5	12089.6
Deubiquitinase OTUD6B	Q8K2H2	Otud6b	33.7	5	25.1701	7	294	18.72	745.9	737.7	731.1	744.6	724.8	753.6	718.7	759.5	732.4	749.5	706.7	753.6	723.1	718.5	718.3	746.9
Deubiquitinating protein VCIP135	Q8CDG3	Vcpip1	134.4	34	37.623	41	1220	124.08	4245.9	4327.5	4274.7	4214.7	4233.9	4237.7	4252.2	4288.5	4250.5	4219.8	4314.8	4371.1	4202.6	4206.8	4146.4	4251.4
Developmentally-regulated GTP-binding protein 1	P32233	Drg1	40.5	9	26.4305	12	367	38.12	1037.1	1090.3	1037	1047.6	1132.2	1056.3	1087.5	1107.1	1100.6	1129.9	1076.1	1152.8	1044.1	1045.5	1046.7	1030.1
Developmentally-regulated GTP-binding protein 2	Q9QXB9	Drg2	40.7	13	39.011	15	364	52.01	2109.2	2106.7	2080.9	2145.3	2180.9	2105.5	2242.4	2070.7	2226.7	2252.9	2276.5	2305.1	2197.7	2232.6	2175.8	2145.4
D-glutamate cyclase, mitochondrial	Q8BH86	Dglucy	66.3	2	3.88979	3	617	12.52	493.2	493.1	475.9	468.8	457.7	446.2	456.4	442.9	474.8	490.7	435.6	441.8	426.9	444.6	450.2	449.3
Diablo homolog, mitochondrial	Q9JIQ3	Diablo	26.8	5	30.8017	5	237	13.39	488.8	484.6	500.4	485.9	507	492.6	511.9	526.2	485.3	500.1	460.9	541.8	479.4	531	536.1	521.3
Diacylglycerol kinase beta	Q6NS52	Dgkb	90.2	21	32.5436	36	802	101.28	4386.9	4022.2	4313	4225.8	4075.9	4026.4	4084.5	4035.1	4123.4	4038.8	3870.5	4054.3	3920.9	3920.3	3938.3	3739.9
Diacylglycerol kinase epsilon	Q9R1C6	Dgke	63.6	17	37.234	26	564	69.25	2690	2618.2	2585.9	2579.2	2551.2	2549.7	2530.1	2579.8	2514.8	2560.7	2447	2519.6	2505.4	2525.5	2513.3	2490.1
Diacylglycerol kinase gamma	Q91WG7	Dgkg	88.5	25	33.8832	35	788	112.84	4953.6	4991.4	4956.2	4847.8	4665.5	4577.3	4705.7	4696.1	4965.4	4533.4	4386.4	4533.4	4642.1	4658.7	4362.9	4439
Diacylglycerol kinase theta	Q6P5E8	Dgkq	102.2	15	23.9829	16	934	50.4	1555.4	1552.1	1506.6	1496.9	1545.9	1464.7	1503	1504.7	1443.1	1463.3	1522.5	1453.5	1469.5	1473	1512.5	1494.5
Diacylglycerol kinase zeta	Q80UP3	Dgkz	104	22	30.6781	29	929	94.21	2578.1	2661.4	2652.4	2472	2652.2	2506.2	2695.4	2639.4	2662.7	2585.2	2358.4	2722.6	2481.1	2634.1	2385.4	2406.6
Diamine acetyltransferase 2	Q6P8J2	Sat2	19.3	2	14.1176	2	170	6.26	51.1	58.7	56.6	61.9	50.5	48.6	52.5	46.8	53.2	51.2	50.9	52.4	50.8	53.6	53.4	49.7
Dickkopf-related protein 3	Q9QUN9	Dkk3	38.4	5	20.9169	5	349	17.44	635.9	648.9	601.5	591.7	591.5	599.3	607.6	605.9	601.2	621.8	596.7	632.2	603.5	606.6	618.9	608.5
Dihydrolipoyl dehydrogenase, mitochondrial	O08749	Dld	54.2	26	62.8684	132	509	418.93	19398.3	18509.6	18490.7	18784.3	19600.7	19715.7	19230.9	19137.8	17258.3	17301.1	18136.1	16754.3	19582.6	19344	19553.4	19588.5
Dihydrolipoyllysine-residue acetyltransferase component of pyruvate dehydrogenase complex, mitochondrial	Q8BMF4	Dlat	67.9	26	44.2368	104	642	339.06	15432.4	15465.7	15487.2	15232.9	14809.5	14489.1	14988.9	14861.9	13779	13653.7	12965.2	12752.2	14731.7	15330.4	14925.8	14482.9
Dihydrolipoyllysine-residue succinyltransferase component of 2-oxoglutarate dehydrogenase complex, mitochondrial	Q9D2G2	Dlst	49	19	42.2907	51	454	167.09	6590.6	6463.3	6408.2	6493.8	6877.6	6720.7	6677.8	6530.4	6144.3	6164.3	6239.9	6138.5	6551.3	6698.3	6821.4	6562.1
Dihydroorotate dehydrogenase (quinone), mitochondrial	O35435	Dhodh	42.7	11	37.4684	15	395	49.34	1708.2	1709.7	1724.4	1644.1	1631.3	1633.3	1617.8	1685.9	1616.1	1622.6	1501	1614.3	1532.3	1608	1595.2	1565.6
Dihydropteridine reductase	Q8BVI4	Qdpr	25.6	16	75.9336	44	241	148.28	5243.9	5152.8	5156.1	5424.5	4795.7	4965.7	5432.8	5055.7	4825.1	4435.4	4587	4131.3	5483.1	5283.2	5328.2	5719.9
Dihydropyrimidinase-related protein 1	P97427	Crmp1	62.1	38	77.2727	217	572	728.17	19186.3	18861.1	19839.2	19880.8	19891.3	20675.2	20526.8	20391.6	23324.7	22402.6	22735.7	24060.4	20765.3	20336.6	19978.4	19917.1
Dihydropyrimidinase-related protein 2	O08553	Dpysl2	62.2	46	79.7203	489	572	1614.57	52425.4	52178.3	53458.6	54073.4	51995	54041.4	53165.4	52910.1	50064.2	49322.3	48758.9	49051	52874.5	52439.1	52341.4	53267.2
Dihydropyrimidinase-related protein 3	Q62188	Dpysl3	61.9	39	75.2632	256	570	799.19	15674.5	14964.7	15328.2	15555.5	17069.8	17020.3	17457.9	17020.2	25536.8	25131.3	26224.5	28749.4	17716.9	17056.2	17122.4	17137.3
Dihydropyrimidinase-related protein 4	O35098	Dpysl4	61.9	35	79.1958	86	572	336.23	13901.9	13535.2	13690.2	14303.1	14514.4	14790.8	14636	14659.9	16408.4	16510	17358.2	17029.6	14834.6	14278.7	14394.7	14750.4
Dihydropyrimidinase-related protein 5	Q9EQF6	Dpysl5	61.5	36	71.6312	99	564	369.03	13986	13677.3	13831.7	14433.8	15377.9	15621.7	15450.4	15349.5	20154.4	20371.5	21497.5	22322	15930.3	15054.6	15359.8	15554.4
Dihydroxyacetone phosphate acyltransferase	P98192	Gnpat	76.8	2	4.71976	2	678	7.01	188.3	202.4	190.7	191.5	200.7	204.8	188.5	190.7	193.2	202.2	202.7	211	191.3	189.4	178.4	186.2
Dipeptidyl aminopeptidase-like protein 6	Q9Z218	Dpp6	91.2	39	48.6318	76	804	243.23	14295.3	14474.7	14368.2	14094	13981.2	13680	14490	14112.6	14735.2	14683	14059.5	14909.6	13862.7	14328.9	14035	13908
Dipeptidyl peptidase 1	P97821	Ctsc	52.3	2	8.00866	2	462	7.32	118.4	109.4	126.2	119.2	128.3	112.8	119.5	113.8	119.6	125.7	115.6	131.7	119.1	117	124	120.3
Dipeptidyl peptidase 2	Q9ET22	Dpp7	56.2	3	6.12648	4	506	10.59	348	331.6	324.2	334	333.4	318.3	312.1	323.1	311.1	340	353.3	343.7	305.2	311.2	338.6	317.9
Dipeptidyl peptidase 3	Q99KK7	Dpp3	82.8	34	65.7182	47	738	183.49	5554.4	5557.9	5515	5502.2	5492.2	5554	5575.7	5552.4	5868.6	5882.1	5926.1	6126.9	5437.4	5575.8	5562.5	5696.4
Dipeptidyl peptidase 8	Q80YA7	Dpp8	102.1	6	7.62332	7	892	13.82	891.4	861.1	912.1	890.2	883.1	849.4	898.1	873.2	902.5	936	902.9	933.5	862.2	896.7	865	898.9
Dipeptidyl peptidase 9	Q8BVG4	Dpp9	97.9	8	15.1972	11	862	26.31	342.1	347.3	331.7	342.5	351.2	333.5	352.9	344.8	337	363.5	332.1	341	338.5	355.4	341.9	325.9
Diphosphoinositol polyphosphate phosphohydrolase 1	Q9JI46	Nudt3	19	10	59.5238	18	168	64.69	2266.1	2322.5	2321	2291.4	2289.6	2278.1	2360.6	2324.6	2248.1	2280.1	2245.1	2278.6	2330.6	2349.2	2323.1	2344.8
Diphosphoinositol polyphosphate phosphohydrolase 2	Q8R2U6	Nudt4	20.1	5	36.3128	8	179	24.78
Diphosphoinositol polyphosphate phosphohydrolase 3-alpha	P0C027	Nudt10	18.6	11	58.5366	15	164	46.71	2018.4	1942	1978.4	1984.9	1997.7	1990.7	1999.4	1963.2	2066.9	2072.7	2070.6	2149.7	2024.1	2025	2042.8	2015.9
Diphosphomevalonate decarboxylase	Q99JF5	Mvd	44	2	5.23691	3	401	8.65	156.8	154.4	153.3	150.3	161.6	164.9	163.2	153.4	162.6	185.7	192.3	193.5	170.2	144.4	164.1	152.6
Diphthine methyltransferase	Q9CYU6	Dph7	53.2	2	3.98323	2	477	5.34	297	295.8	290.4	292	301.7	312.6	292.3	287.4	295.9	299.1	314	293.3	289.5	290.9	289.4	318.2
DIS3-like exonuclease 2	Q8CI75	Dis3l2	97.7	11	12.9885	12	870	23.57	959.2	981.7	985.5	955.8	918.5	927.6	913.9	929.5	907.8	949.9	888.8	975.7	891.6	943	946.2	991
Disabled homolog 1	P97318	Dab1	63.5	2	3.23129	3	588	4.65	121.8	117.9	108.7	114.8	121.8	113.1	126.2	129.5	107.7	108.5	125.3	110.2	119.5	115.5	133.9	116.6
Disabled homolog 2	P98078	Dab2	82.3	3	3.39426	3	766	4.59	83.8	83.3	103.5	90.8	99.6	98	89.5	98.4	79.2	66.4	75.2	82.3	102.3	85.2	108.9	105.9
Disabled homolog 2-interacting protein	Q3UHC7	Dab2ip	131.6	20	19.7645	22	1189	48.69	1100	1177.5	1164.5	1150.9	1142.1	1143.4	1150.2	1137.4	1200.9	1229.6	1178	1267.9	1120.1	1150	1104.9	1118.2
Disco-interacting protein 2 homolog A	Q8BWT5	Dip2a	165.1	18	15.4957	24	1523	62.44	1737	1727.7	1777.9	1741.7	1742.3	1741.1	1725.8	1695.2	1775.3	1731.6	1836.7	1747.5	1773.5	1664.1	1704.6	1757.3
Disco-interacting protein 2 homolog B	Q3UH60	Dip2b	171	29	24.0152	38	1574	116.77	2594.9	2567.1	2575.5	2619.9	2525.9	2547.1	2589	2593.3	2557.8	2657.1	2632	2628.9	2524.1	2531.2	2567.7	2580.8
Disheveled-associated activator of morphogenesis 1	Q8BPM0	Daam1	123.3	26	25.3482	32	1077	79.54	3703	3795.6	3770.5	3652.1	3742.2	3695.7	3779.9	3804.1	3685	3691.4	3518.3	3739.5	3630.4	3735.8	3782.1	3738
Disheveled-associated activator of morphogenesis 2	Q80U19	Daam2	128.3	10	10.583	10	1115	30.96	342.4	376.6	379.6	373.7	343.4	349.8	357.1	330.4	343.3	339.3	353.5	350.1	353.6	343.5	359	360.3
Disintegrin and metalloproteinase domain-containing protein 10	O35598	Adam10	83.9	8	10.2804	9	749	22.05	749.5	701.8	692.8	670.6	662.8	673.5	705.7	695.3	656.8	670.6	679.7	671.5	712.4	669.1	700.7	707.1
Disintegrin and metalloproteinase domain-containing protein 11	Q9R1V4	Adam11	84.1	16	31.1772	30	773	106	3913.9	3620.1	3888	3777.9	3721.6	3875.1	3808.1	3834.7	3588	3444.1	3399.9	3485.8	3650.9	3667.8	3661.9	3705.1
Disintegrin and metalloproteinase domain-containing protein 17	Q9Z0F8	Adam17	93	2	3.14389	2	827	3.96	168.3	189.1	187.5	179.3	213.7	214.3	191.4	204.6	182.6	191.1	196.1	198.1	179.8	209.1	181.8	175.5
Disintegrin and metalloproteinase domain-containing protein 22	Q9R1V6	Adam22	99.7	29	41.5929	44	904	142.91	6367.5	6358	6174.7	6374.6	6253.8	6300.3	6376.7	6293.9	5516.8	5781.9	5854	5374.3	6220.5	6267.2	6279.9	6394.9
Disintegrin and metalloproteinase domain-containing protein 23	Q9R1V7	Adam23	91.5	18	31.1218	32	829	92.41	4017.3	4022.6	4026.8	4043.8	4074.4	4125.4	4126.7	4165.5	3733.6	3769.1	3684.1	3777.2	4039.4	4075.5	4151.7	4023.7
Disintegrin and metalloproteinase domain-containing protein 9	Q61072	Adam9	92	2	4.26036	2	845	4.69	35.9	32.7	40	35.6	40.3	37	34.9	40.3	41.6	41	37.9	39.9	40.3	48.3	40.5	46
Disks large homolog 1	Q811D0	Dlg1	100.1	34	42.3204	51	905	159.89	2866.6	2847	2959.5	2963.2	2920.7	2998.4	2798.8	2926	2737.6	2780.3	3080.3	2675.3	2930.5	2778.5	2841	2939.7
Disks large homolog 2	Q91XM9	Dlg2	94.8	49	59.7418	84	852	285.08	12135.6	11845.6	11990.9	11976.9	11870.1	12077.1	11933.7	11945.4	11778.4	11680.5	11866.7	11644.8	11649.5	11596.5	11608.6	11500.6
Disks large homolog 3	P70175	Dlg3	93.4	41	54.6525	67	849	238.82	9676.9	9906	9862.1	9576.4	9998.6	10080.4	9935.3	9974.6	9955	9691.1	9446.6	10188.1	9801.6	9936.8	9602	9449.6
Disks large homolog 4	Q62108	Dlg4	80.4	42	57.8729	76	724	267.74	8919.5	9090	8781.3	8909.1	9533.7	9818	9572.9	9423.8	9656.2	9420.7	9572.5	9749.6	9024.3	9151.8	8818	8984.2
Disks large-associated protein 1	Q9D415	Dlgap1	110.3	34	35.8871	47	992	153.17	4743.4	4894.1	4770.9	4643.6	4753.3	4667	4724.1	4586.3	4573.6	4527.1	4258.9	4531.2	4623	4597.8	4600	4392.3
Disks large-associated protein 2	Q8BJ42	Dlgap2	119	35	31.8225	47	1059	111.49	4203.4	4288.4	4160.2	4004	4057.4	4177.2	4094.2	4066.6	4004.1	4089.7	4153.4	4091.7	4209	4004.4	3947.6	3917.2
Disks large-associated protein 3	Q6PFD5	Dlgap3	105.8	34	37.7687	47	977	138.42	4913.6	4849.1	4817.9	4663.7	4592.7	4593.2	4582.1	4549.9	4556.9	4605.2	4457.3	4493.1	4411.7	4453	4501.7	4357.1
Disks large-associated protein 4	B1AZP2	Dlgap4	108	28	38.3065	44	992	148.96	3768.8	3762.8	3798	3826.8	3726.4	3886.4	3733.4	3803.1	3874.5	3898.1	4054	3968.2	3775.6	3706.8	3560.7	3644.1
DmX-like protein 1	Q6PNC0	Dmxl1	335.8	14	7.06937	16	3013	45.26	522	503.2	550.5	494.8	522.8	547.5	509.9	523.8	483.6	485.1	507.1	497.3	506.4	503.5	486.2	499.5
DmX-like protein 2	Q8BPN8	Dmxl2	338	108	46.8997	193	3032	642.32	25081.7	24815.9	25330.3	24331.8	24434.2	24206.2	24547.5	24514.8	24908.2	25169.9	23876.9	24634.2	23914.1	24740.8	24549.7	23403.8
DNA damage-binding protein 1	Q3U1J4	Ddb1	126.8	43	44.2105	71	1140	236.16	8998.4	9564.2	9112.2	9350.5	8893.9	8743.8	8834.6	8867.7	9143.9	9307	9462	9262.8	9041.9	9138.6	9168.8	9299.5
DNA mismatch repair protein Msh2	P43247	Msh2	104.1	2	4.06417	4	935	15.34	151.5	151.1	146.8	167	157.6	156.9	144.6	159.9	147.9	159.2	171.8	165.9	142	144.6	142.2	152.9
DNA topoisomerase 1	Q04750	Top1	90.8	13	19.8175	15	767	32.79	1916.6	1968.8	1978.8	1979.3	1917.7	1981.7	1989.7	2017.2	2121.8	2203.4	2067.8	2195	1947.6	1967.7	2007.1	1950.9
DNA topoisomerase 2-beta	Q64511	Top2b	181.8	18	13.5856	22	1612	59.76	2456.6	2492.3	2497.3	2455.5	2509.7	2489.5	2453.6	2548.4	2489	2609.5	2603.2	2690.9	2402.1	2428.2	2546.7	2496.9
DNA topoisomerase 3-beta-1	Q9Z321	Top3b	96.9	3	6.38051	3	862	8.43	156.1	167.3	152.9	157.8	153.7	160.2	181.3	141.4	175.2	183.5	176.2	185.4	153	156.9	156.4	149.2
DNA-(apurinic or apyrimidinic site) lyase	P28352	Apex1	35.5	14	51.4196	18	317	55.04	1875.2	1969.4	1985.4	1979.6	2026.9	2055	1953.3	1997.8	1994.3	2041.7	1981.9	2165.5	2005.1	1977.1	1981.5	1958.3
DNA-binding protein SATB1	Q60611	Satb1	85.8	2	3.53403	2	764	4.24	538.7	483.3	505.8	496.6	358.5	404.6	378.7	389.8	492.3	468.9	526.1	427.3	340.1	450.4	387.5	345.1
DNA-directed RNA polymerase II subunit RPB1	P08775	Polr2a	217	4	2.94416	4	1970	11.49	107.6	120.8	138.6	108.5	117.7	122.5	121.2	131.8	122	127.1	129.8	127.5	117.3	118.1	114.5	117.5
DNA-directed RNA polymerase II subunit RPB3	P97760	Polr2c	31.4	2	14.1818	2	275	7.35	204.7	223.2	208.5	215.7	217.8	215.3	226.8	213	220.3	215	206.5	211.8	201	203.6	219.7	222.3
DNA-directed RNA polymerase II subunit RPB4	Q9D7M8	Polr2d	16.3	3	35.9155	3	142	12.54	170.7	192	177	172	180.4	172.9	175.8	165.2	195.9	188.6	203.4	179.7	167.9	169.9	174.3	180.2
DNA-directed RNA polymerase II subunit RPB9	P60898	Polr2i	14.5	3	20.8	3	125	8.6	143.6	146.9	131.8	140.3	142	143.6	141.1	151.6	136.8	139.1	160.6	140.6	148.9	130.9	134.4	153.6
DNA-directed RNA polymerases I, II, and III subunit RPABC1	Q80UW8	Polr2e	24.6	5	27.619	5	210	10.65	538.6	545.9	524.1	526.9	524	513.5	488.1	504.5	491.1	507.9	548.7	554.7	511.2	546.3	510.4	512.6
DnaJ homolog subfamily A member 1	P63037	Dnaja1	44.8	19	61.7128	42	397	138.61	4680.5	4570.8	4743.9	4642	4521.5	4517.3	4618	4666.5	4895.4	4884.8	4830.4	4962.1	4608.5	4547.3	4565.5	4556.9
DnaJ homolog subfamily A member 2	Q9QYJ0	Dnaja2	45.7	19	55.0971	31	412	108.15	5793.8	5691.1	5779.1	5664.1	5729.6	5783.8	5735.8	5727.9	5728.3	5733.7	5630.1	5782.5	5685.2	5772.1	5739.5	5697.3
DnaJ homolog subfamily A member 3, mitochondrial	Q99M87	Dnaja3	52.4	14	39.7917	17	480	59.19	2334.4	2281.2	2240.8	2298	2432.9	2389.6	2440.6	2344.9	2316.4	2257.6	2377	2261.9	2433.8	2409.3	2371.3	2322.9
DnaJ homolog subfamily A member 4	Q9JMC3	Dnaja4	44.9	10	27.204	12	397	32.51	1232.6	1257.4	1243.3	1247.5	1221.2	1203.9	1191.3	1225.8	1155.6	1165.2	1091.6	1095.4	1152.7	1204	1222.1	1164
DnaJ homolog subfamily B member 1	Q9QYJ3	Dnajb1	38.1	12	39.4118	15	340	32.85	1920.5	2036.3	1935.5	1982.2	2019	1911.6	2006.8	2012.7	1957.8	1966	2002.8	1994	1960.5	1955.2	1987.5	2079.4
DnaJ homolog subfamily B member 11	Q99KV1	Dnajb11	40.5	8	27.3743	9	358	28.46	1669.4	1650.8	1636.2	1620.5	1575.3	1559.8	1609.2	1642.8	1789.5	1833.7	1746.9	1845.1	1565.2	1684.2	1640	1715.5
DnaJ homolog subfamily B member 14	Q149L6	Dnajb14	42.3	3	6.59631	5	379	11.17	315.8	282	288.6	287.5	282.8	312.3	302	292.9	295.4	314.5	305.5	317.5	301.2	269.2	289.8	292.2
DnaJ homolog subfamily B member 2	Q9QYI5	Dnajb2	35.6	4	14.1975	6	324	17.23	644.2	613.5	616.6	632.3	585.8	634	619.6	605.5	630.3	635.3	662.5	642.4	688.6	642.9	657.6	650.1
DnaJ homolog subfamily B member 4	Q9D832	Dnajb4	37.8	12	51.0386	12	337	30.24	1082.9	1111.8	1126.5	1101	1088.6	1055.3	1059.8	1059	1106.5	1124.5	1206.8	1118.7	1071.6	1049.4	1084.5	1102.8
DnaJ homolog subfamily B member 5	O89114	Dnajb5	39.1	6	21.5517	8	348	17.41	925.2	971.1	976	967.8	963	1008.2	983.3	949.2	959.4	941	922.2	980	957	961.4	936.8	961.9
DnaJ homolog subfamily B member 6	O54946	Dnajb6	39.8	2	4.65753	3	365	7.29	316.7	338.2	343.2	311	309.7	273.2	313.7	308.5	290.8	307.3	313	302.9	304.2	344.6	322.2	384.7
DnaJ homolog subfamily C member 10	Q9DC23	Dnajc10	90.5	4	11.0971	6	793	15.78	326.7	328.1	336.3	324.1	324.6	326.7	304	335	331	347.5	334.9	348.3	320.5	292.4	299.8	311
DnaJ homolog subfamily C member 11	Q5U458	Dnajc11	63.2	17	33.4526	26	559	74.82	2711.3	2791.1	2784.4	2701.3	2647.8	2619.4	2621.4	2689.2	2545.7	2669.8	2457	2601.5	2555.1	2657.7	2627	2557.9
DnaJ homolog subfamily C member 16	Q80TN4	Dnajc16	89.1	2	3.49741	2	772	3.44	228.4	261	242	235.5	226.8	228.8	239.1	257.1	242.3	238.6	248.2	268.9	230	240.5	229.7	237.2
DnaJ homolog subfamily C member 2	P54103	Dnajc2	71.7	4	10.306	5	621	16.14	177.8	179.8	194.6	170.8	179	170.7	174.3	178.2	190.1	168.2	187.1	179.6	221.5	212.4	230	171.5
DnaJ homolog subfamily C member 27	Q8CFP6	Dnajc27	30.8	2	7.32601	2	273	4.65	176.8	205.6	205.7	224.5	196.6	202.2	190.2	194.9	184.1	188.3	182.3	197.1	159.5	173.6	177.7	193.9
DnaJ homolog subfamily C member 3	Q91YW3	Dnajc3	57.4	11	29.5635	13	504	35.68	1260.1	1322.8	1290.1	1309.8	1285.9	1258.3	1233.8	1290.4	1326.2	1299.9	1317.4	1318.1	1228	1230.5	1293.2	1315.8
DnaJ homolog subfamily C member 5	P60904	Dnajc5	22.1	9	46.4646	19	198	82.98	3152.7	3734.2	3613.7	3321.4	3339.4	3214.6	3313.6	3581.3	3338.7	3462	3228.9	3257.2	3540.9	3705.5	3587.7	3709.6
DnaJ homolog subfamily C member 7	Q9QYI3	Dnajc7	56.4	16	32.3887	19	494	42.47	2153.4	2161.5	2150.1	2131.4	2163.9	2143.5	2111.7	2154.2	2154.3	2211.8	2264.7	2251.4	2158.2	2113	2097.6	2127.8
DnaJ homolog subfamily C member 8	Q6NZB0	Dnajc8	29.8	10	43.083	12	253	35.41	1620.3	1640.2	1621	1582.7	1631.8	1550	1562.3	1584.7	1622.9	1667	1700.5	1685.3	1668.8	1629.2	1626.4	1627.5
DnaJ homolog subfamily C member 9	Q91WN1	Dnajc9	30	3	11.9691	4	259	10.24	291.4	320.7	304.2	320.2	309.9	297.8	320.2	308.7	310.4	301.3	346.2	308.1	310.5	295.5	275.5	300
Dolichol-phosphate mannosyltransferase subunit 1	O70152	Dpm1	29.2	5	20	7	260	14.39	669.1	701.1	704.6	705	685.9	660.3	695.2	671.9	689.8	725.5	737.1	710.7	667.5	665.7	660.2	686.8
Dolichyl-diphosphooligosaccharide--protein glycosyltransferase 48 kDa subunit	O54734	Ddost	49	14	37.1882	22	441	63.77	3425.5	3564.9	3461.1	3423	3406.3	3202	3299.7	3318.3	3670.2	3698.9	3670.9	3804.5	3278.9	3368.1	3378.5	3452.6
Dolichyl-diphosphooligosaccharide--protein glycosyltransferase subunit 1	Q91YQ5	Rpn1	68.5	32	53.9474	51	608	144.97	8130	8397.6	8325.1	8299.3	8182.9	8352.9	8130.2	8163.2	8658	8709.1	8614.4	9160.2	7849.7	8127.8	8164.8	8039.4
Dolichyl-diphosphooligosaccharide--protein glycosyltransferase subunit 2	Q9DBG6	Rpn2	69	18	32.9635	31	631	115.22	2954.7	3023.9	3036.6	3026.8	3027	2924.6	2959.3	2995.3	3244.4	3223.7	3206.2	3264.4	2939.9	2978.5	2999.8	2903.6
Dolichyl-diphosphooligosaccharide--protein glycosyltransferase subunit DAD1	P61804	Dad1	12.5	2	19.469	2	113	6.23	284.3	312.8	307.1	302.5	280.5	270.9	270.3	295.3	292.5	288.6	296.6	286.8	254.3	285	265.3	274.6
Dolichyl-diphosphooligosaccharide--protein glycosyltransferase subunit STT3A	P46978	Stt3a	80.5	8	10.3546	8	705	20.17	1265.5	1206.2	1207.7	1182.3	1195.6	1096.8	1163.1	1214.5	1225	1327.7	1301.2	1341.5	1156.5	1215.3	1258.9	1199.7
Dolichyl-diphosphooligosaccharide--protein glycosyltransferase subunit STT3B	Q3TDQ1	Stt3b	93.2	6	7.53341	6	823	18.12	684.8	729.5	684.6	704.5	666.4	661.4	678.2	675.7	723.2	747.5	752.1	762.2	650.1	696.8	684	684
Dolichyl-phosphate beta-glucosyltransferase	Q9DB25	Alg5	36.8	2	8.02469	2	324	3.3	160.4	160.3	177.9	155.6	163.3	162.8	171.7	156.2	158.9	164.4	170.8	161.9	151.8	153.3	168.2	165.7
DOMON domain-containing protein FRRS1L	B1AXV0	Frrs1l	32.5	11	51.8771	19	293	52.95	2118	2208.7	2277	2144.7	2110.2	2195.2	2200.9	2253.8	2257.3	2087.8	1974.1	2185.4	2057.8	2044.9	1944.3	1931.1
Double C2-like domain-containing protein alpha	Q7TNF0	Doc2a	44.6	2	4.19753	2	405	0
Double zinc ribbon and ankyrin repeat-containing protein 1	Q8C008	Dzank1	85	4	8.99743	4	778	13.73	320.1	278.1	326.4	320.3	313.4	342.9	328	317.3	302.9	310.2	328.1	296.6	324.3	295	318.5	310.3
Double-strand-break repair protein rad21 homolog	Q61550	Rad21	72	2	6.29921	2	635	3.56	48.3	46.2	50.8	58.8	52	51.3	54.3	56	63.9	56.8	62.8	58.6	52.4	56.6	57.2	62.2
Double-stranded RNA-binding protein Staufen homolog 1	Q9Z108	Stau1	53.9	3	6.57084	3	487	6.22	503	493.7	511.1	479.2	487.5	486.8	492.8	520.7	525.3	574.1	500	594.2	507.2	534.3	563.3	517.1
Double-stranded RNA-binding protein Staufen homolog 2	Q8CJ67	Stau2	62.5	2	4.73684	2	570	2.51	152.6	139	157.9	153.5	153.2	158.5	153.9	151.6	143.1	157.1	144.6	159	156.9	148.5	154.7	162.9
Double-stranded RNA-specific adenosine deaminase	Q99MU3	Adar	130.4	2	2.4618	2	1178	6.82	327.8	337.1	308.5	326.2	317.4	326.4	321.4	313	308.4	333.4	324	320.3	315.9	300.6	323.9	313.1
Dr1-associated corepressor	Q9D6N5	Drap1	22.3	3	21.9512	3	205	2.28	206.6	195.6	193.8	205.4	194.2	200.2	200.8	186.9	192.3	206.4	184.2	214.7	172.9	202.4	204.4	211.2
Drebrin	Q9QXS6	Dbn1	77.2	34	57.7904	116	706	409.72	14352.9	14498.6	14566.5	14276.5	14841.3	14902.9	14737.7	14451.4	15164.2	14910.2	14650.1	15061	14608.9	14474.3	14099.7	13925.8
Drebrin-like protein	Q62418	Dbnl	48.7	25	59.633	58	436	190.74	9318.2	9094.2	9058.6	9094.2	9654	9719.4	9345	9428.2	9297	9306.8	9744.5	9398.7	9410.1	9270.2	9263.8	9137.7
Dual 3',5'-cyclic-AMP and -GMP phosphodiesterase 11A	P0C1Q2	Pde11a	104.5	2	3.53698	2	933	2.07	57.5	54.5	54.3	53.9	65.7	55.8	58.1	60	57.1	62.2	54.3	55.1	62.3	58.5	59.7	57
Dual specificity mitogen-activated protein kinase kinase 1	P31938	Map2k1	43.4	26	66.1578	72	393	236.68	14046.1	13765.6	13756.9	13832.9	13466.3	13530	13731	13493.1	13434.5	12800.5	12724.7	12861.2	13538.6	13620.1	13360.8	13056.7
Dual specificity mitogen-activated protein kinase kinase 2	Q63932	Map2k2	44.4	18	53.8653	38	401	103.56	1350.2	1396.3	1397	1351.8	1344.5	1313.1	1338.8	1364.8	1351.5	1328.1	1337.1	1341	1385.7	1313	1335.8	1334.3
Dual specificity mitogen-activated protein kinase kinase 4	P47809	Map2k4	44.1	21	58.9421	42	397	127.63	5361.7	5546.7	5474	5548	5563.2	5709.1	5600.5	5551.1	5704.8	5405.3	5554.5	5575.5	5607.3	5582.8	5430.3	5365.7
Dual specificity mitogen-activated protein kinase kinase 6	P70236	Map2k6	37.4	14	50.2994	20	334	59.86	2418.4	2398.7	2444.9	2446.4	2345.5	2451.3	2434.6	2429.5	2522.8	2510.1	2464.4	2501.8	2403.4	2398.2	2408.8	2399.1
Dual specificity mitogen-activated protein kinase kinase 7	Q8CE90	Map2k7	59.3	7	12.7103	8	535	19.46	1222.7	1234.9	1229.1	1221.9	1218.9	1277.7	1213.9	1235.5	1150.8	1228	1181.5	1190.5	1212	1236.9	1216.7	1232
Dual specificity phosphatase 28	Q8BTR5	Dusp28	17.5	2	23.3129	2	163	7	46.7	41.4	43.3	50.9	45.5	36.8	47.7	37.2	41	38.9	41.1	43.2	40.9	43.8	48.4	40
Dual specificity protein phosphatase 15	Q8R4V2	Dusp15	26.2	4	24.6809	5	235	13.96	348.9	351.1	333.7	340.8	348.1	326.8	352.2	344.9	338.2	343.1	336.8	350.7	333.2	349.6	334.6	350.9
Dual specificity protein phosphatase 3	Q9D7X3	Dusp3	20.5	7	50.8108	14	185	62.88	2202.9	2223.2	2236.1	2226.6	2184.4	2198.5	2249.7	2232.4	2286.5	2254	2195.2	2242	2198.3	2201.1	2131.3	2248.2
Dual specificity tyrosine-phosphorylation-regulated kinase 1A	Q61214	Dyrk1a	85.4	3	6.1599	6	763	14.93	113.1	129.9	120.2	138	120.4	127.6	119.5	122.8	120.8	132.4	138.6	130.1	113.5	125.4	118.2	130.4
Dynactin subunit 1	O08788	Dctn1	141.6	72	65.4176	125	1281	448.51	16875.9	16681	17013.9	17244.1	16997.9	17472.7	17418.1	17213.3	16992.9	17093.2	17245.4	16868.9	17179.5	16979.8	16963.6	17152.2
Dynactin subunit 2	Q99KJ8	Dctn2	44.1	24	66.1692	61	402	232.4	10089.1	9728.6	9783.1	9787.9	9898.6	10029.1	10086.4	9902.1	9646.8	9808.2	10066	9663.3	10236.4	9893.4	9798.1	10161.6
Dynactin subunit 3	Q9Z0Y1	Dctn3	21	10	44.6237	21	186	44.74	1548.5	1538.8	1561.5	1589.5	1529.6	1502.7	1549	1516.6	1546.3	1585.1	1637.5	1512.8	1568.6	1553.2	1515.7	1627.3
Dynactin subunit 4	Q8CBY8	Dctn4	53	21	60.8137	35	467	113.55	3714.3	3800.1	3763.5	3784.2	3712.6	3828.2	3755.8	3831.4	3700.5	3764.6	3893.6	3797.1	3740.8	3692.8	3678.2	3787.2
Dynactin subunit 5	Q9QZB9	Dctn5	20.1	5	28.022	9	182	19.3	756.3	738.6	766.8	744.9	730.1	715	716.4	739.2	761.3	719.6	766	746.4	746.8	724.8	714.3	745.5
Dynactin subunit 6	Q9WUB4	Dctn6	20.7	7	53.6842	11	190	32.72	1300.5	1257.7	1231.5	1254.1	1282.3	1297	1313.1	1241.4	1215.4	1244	1320.8	1279.9	1296.9	1316.2	1283	1327.4
Dynamin-1	P39053	Dnm1	97.7	92	85.8131	450	867	1409.3	71711.7	69208.5	70878	69418.5	68930.8	68718.4	70302	69246.4	68658.1	68304.3	65201.6	65895.5	70014.9	71137	69818.8	67839.6
Dynamin-1-like protein	Q8K1M6	Dnm1l	82.6	59	80.7278	159	742	540.38	17750.5	17968.1	17811.5	17732.2	17651	17483.6	17809	17798.3	17585.7	18089.4	17844.2	17762.6	17610.3	17856.2	17628.2	17456.8
Dynamin-2	P39054	Dnm2	98.1	40	41.2644	91	870	259.95	1101.2	1118.9	1109.1	1136	1113	1101.5	1113.7	1112.7	1168.2	1122.9	1188.9	1172.8	1100.9	1111.2	1117.3	1164.3
Dynamin-3	Q8BZ98	Dnm3	97.1	61	61.6454	161	863	483.92	9720.8	9702.3	9701.9	10034.4	9515.1	9505.3	9454.4	9429.7	9145.7	9211.9	9675.4	8939.1	9492.7	9284.3	9595.8	9355.3
Dynamin-like 120 kDa protein, mitochondrial	P58281	Opa1	111.3	66	68.3333	140	960	439.2	20354.2	20031.9	20411.6	20324.6	20303.5	20010.4	20078.2	20120	19683.8	20227.6	19345.5	19962.8	19382.8	19729.2	20326.6	19347.5
Dynein light chain 1, axonemal	Q05A62	Dnal1	21.5	6	36.8421	8	190	16.01	841.3	796.3	786.3	819.2	793.9	825.2	824	811.3	826.2	889.7	860.6	896.7	837.8	809.6	873.5	824.1
Dynein light chain 1, cytoplasmic	P63168	Dynll1	10.4	9	69.6629	61	89	116.71	5053.4	4663.5	5087.8	4907.1	5189.7	5120	5097.3	5086.1	5284	5529	5131.1	5590.5	5477.3	5234.4	5249.4	5216.5
Dynein light chain 2, cytoplasmic	Q9D0M5	Dynll2	10.3	8	69.6629	75	89	161.99	7655.3	7350.8	7417.3	7395.1	7111.2	7109.4	6968.4	7207.1	6926.1	7318.3	7229.6	6837.7	7656.5	7207	7286.3	7575.3
Dynein light chain roadblock-type 1	P62627	Dynlrb1	11	4	73.9583	21	96	76.43	1413.2	1343.4	1367.3	1348.6	1377.7	1351.4	1376.5	1353	1423.3	1444	1506.7	1409.4	1494.9	1357.5	1356.1	1439.3
Dynein light chain Tctex-type 3	P56387	Dynlt3	12.9	2	37.931	4	116	16.65	262.6	296.8	265.2	294	265.3	273.4	267.2	275.4	273.9	277.2	319.8	277.7	292	265.9	267.6	300.5
Dystonin	Q91ZU6	Dst	833.7	64	10.9022	77	7393	217.52	6214.2	6280.4	6275.9	6279.9	6169.8	6124	6183	6149.4	6268.4	6308.2	6320.4	6445	6049.3	6273.7	6117.1	6369.8
Dystrobrevin alpha	Q9D2N4	Dtna	84	24	34.9866	29	746	85.37	3698.2	3735.3	3699.3	3713.2	3716.7	3751.1	3695.2	3640	3604.8	3641	3585.1	3639.9	3676.8	3705.1	3721.3	3683.6
Dystroglycan	Q62165	Dag1	96.8	10	15.9015	14	893	39.79	2395	2436.9	2409.8	2406	2525	2436.3	2369.3	2420.7	2472.3	2486.7	2610.6	2556.3	2410.9	2284.9	2419.1	2367
Dystrophia myotonica WD repeat-containing protein	Q08274	Dmwd	69.8	11	17.8947	12	665	28.96	2062.8	2063.2	1990.8	2025.3	1995.2	1894.7	2038.6	1978.9	1915.8	1879.5	1875	1846.1	1972	2004	1977.3	1975.7
Dystrophin	P11531	Dmd	425.6	15	5.89995	18	3678	57.81	1328.4	1310.3	1325.7	1317.7	1353.1	1387.8	1319	1354.8	1325.2	1275.1	1328.9	1362.4	1349.3	1311.1	1288.4	1262
E3 SUMO-protein ligase RanBP2	Q9ERU9	Ranbp2	340.9	38	15.3947	39	3053	106.14	5099.4	5447.7	5288.3	5296	5297.1	5340.2	5261.8	5234.1	5230	5115.8	5188.7	5232.8	5161.2	5216.9	5207.5	5148.2
E3 ubiquitin-protein ligase ARIH1	Q9Z1K5	Arih1	64	8	14.7748	9	555	22.79	553.9	566.3	562.4	564.1	554.8	553.3	602	554.1	556.9	537.1	541	516.6	552.3	560.1	552	557.2
E3 ubiquitin-protein ligase ARIH2	Q9Z1K6	Arih2	57.7	2	4.47154	2	492	3.2	113.4	116.4	122.8	129.9	130.8	134.7	133.8	126.9	143.1	107.8	114	128.4	121.9	114.4	116.5	110.3
E3 ubiquitin-protein ligase BRE1A	Q5DTM8	Rnf20	113.4	4	9.55807	4	973	10.73
E3 ubiquitin-protein ligase CBL	P22682	Cbl	100.5	8	12.3768	10	913	22.52	864.7	919	886.4	881.1	850.9	890.4	888.6	851.1	867.2	856	855.6	878.7	871.3	837.5	849.8	906.4
E3 ubiquitin-protein ligase CBL-B	Q3TTA7	Cblb	109	2	2.64766	3	982	9.16	92	103.3	92.8	86.7	94.2	88.1	83.9	95.3	88.5	82.3	89.6	79.2	99.8	98.8	95	92.8
E3 ubiquitin-protein ligase HECTD1	Q69ZR2	Hectd1	289.9	12	7.10466	15	2618	40.09	1025.9	1048.3	986.3	1003.4	1007.9	982.7	997.4	990.4	988	1001.5	963.4	1008	981.3	1006.9	1029.9	1074.1
E3 ubiquitin-protein ligase HECTD3	Q3U487	Hectd3	97.3	13	19.8606	16	861	55.46	1368.1	1358.6	1376.1	1422.4	1468.8	1494.6	1468.9	1415.2	1468.3	1463.7	1439.4	1464.4	1422.1	1415	1435.9	1382.8
E3 ubiquitin-protein ligase HECW1	Q8K4P8	Hecw1	179.4	4	2.80549	7	1604	9.69
E3 ubiquitin-protein ligase HECW2	Q6I6G8	Hecw2	176.1	8	6.59062	11	1578	20.5	196	199.2	192.7	212.3	190.7	187.8	186	178.6	183.8	221.1	226.4	199.9	201.5	184.2	182.1	187
E3 ubiquitin-protein ligase HUWE1	Q7TMY8	Huwe1	482.3	56	18.8714	71	4377	235.31	7371.1	7397.9	7436.1	7617.9	7148.4	7347.1	7488.3	7350.6	7444.3	7388.2	7250.2	7420.1	7349.4	7424.4	7367.2	7483.7
E3 ubiquitin-protein ligase Itchy	Q8C863	Itch	98.9	7	11.6898	8	864	15.92	558.9	594.3	581.9	572.8	592.9	534.3	533.1	576.5	525.8	562.6	573.6	565.5	538.9	569.5	560.9	572.1
E3 ubiquitin-protein ligase KCMF1	Q80UY2	Kcmf1	41.8	4	13.3858	7	381	24.75	172.8	172.3	174.8	171.4	168.7	175.6	185.1	166.6	188.1	169.3	180.9	171.7	166	155.3	168.7	163.7
E3 ubiquitin-protein ligase listerin	Q6A009	Ltn1	198.8	2	1.41483	2	1767	2.32	43	44.9	47	39.8	51.1	49.3	39.1	45.4	37.1	44.9	42	40.2	36.8	35.3	45.5	42.5
E3 ubiquitin-protein ligase LRSAM1	Q80ZI6	Lrsam1	83.9	12	23.3838	15	727	34.11	790.7	752.5	775.4	748.1	799	814.8	805.5	792.8	755.4	788.3	752.2	779.1	760.3	809.3	819.8	812.7
E3 ubiquitin-protein ligase MARCH5	Q3KNM2	2022-03-05	31.2	4	19.4245	5	278	14.43	231.6	231.5	233.5	248.1	230.6	242.4	238.9	242	240.4	253.7	241.9	246	233.4	224.3	237.3	240.3
E3 ubiquitin-protein ligase MGRN1	Q9D074	Mgrn1	58.4	4	14.8496	5	532	18.25	287.2	290.1	319.5	303.2	303.2	302	291.6	300	309.1	303.7	315.6	325.5	376.4	312.3	296.6	299.3
E3 ubiquitin-protein ligase MYCBP2	Q7TPH6	Mycbp2	520.9	11	3.47442	12	4749	23.89	1341.8	1388.5	1386.2	1390.9	1345.6	1370.7	1353.9	1352.3	1385.4	1390	1320	1398.4	1291.6	1374.7	1324.7	1312.5
E3 ubiquitin-protein ligase NEDD4	P46935	Nedd4	102.6	24	38.106	36	887	106.8	3194.2	3203.3	3127.9	3213.1	3237.3	3140.8	3206.1	3074.3	3257.4	3224.6	3306.7	3303.9	3157.2	3093.9	3188.7	3102.7
E3 ubiquitin-protein ligase NEDD4-like	Q8CFI0	Nedd4l	115.3	25	29.8805	32	1004	84.78	3509.3	3566.5	3515.8	3541.5	3375.9	3319.6	3433.7	3475.7	3498	3520.6	3415.8	3542.5	3383.4	3537.6	3415.2	3501.6
E3 ubiquitin-protein ligase NEURL1	Q923S6	Neurl1	61.7	2	5.92334	2	574	3.41	128	119.5	120.4	136.9	125.5	118.4	120.4	115.6	121	112	105.4	129.5	116.9	125.1	119.5	123.7
E3 ubiquitin-protein ligase PPP1R11	Q8K1L5	Ppp1r11	14.5	4	40.458	6	131	22.69	585	556	527.2	584.3	561.2	599.7	595.6	571.7	568.2	568.9	612	577.8	591.7	588.5	575.2	553.9
E3 ubiquitin-protein ligase Praja-1	O55176	Pja1	63.9	3	4.32526	3	578	4.33	188.1	193.9	185.7	180.1	172.6	176.1	165.5	173.8	185.6	187.1	195.8	171.7	184.7	174.3	150.7	168.8
E3 ubiquitin-protein ligase Praja-2	Q80U04	Pja2	77.9	6	12.8713	6	707	19.8	785.8	770.3	762.1	726.6	765.9	742.1	765.7	742.9	798.6	747.1	846	738.5	767.4	755.8	665.4	676.9
E3 ubiquitin-protein ligase RBX1	P62878	Rbx1	12.3	3	12.963	4	108	10.42	924.3	987.5	929.9	963.6	910.5	847.1	877.3	907	972.8	960.7	985.9	939.4	948.8	895.9	906.4	990.5
E3 ubiquitin-protein ligase RING2	Q9CQJ4	Rnf2	37.6	2	6.84524	3	336	7.72	418.6	428.6	411.4	412.4	430.1	425.6	415.8	415.7	413.5	413.8	415.7	409	410	417.8	397.8	395.8
E3 ubiquitin-protein ligase RMND5A	Q80YQ8	Rmnd5a	44	3	6.90537	3	391	4.99	320.4	345.8	339.5	346.8	330.2	339.8	360.9	344.4	338.7	361.5	361.5	357.9	314.3	331.5	346.6	340
E3 ubiquitin-protein ligase RNF114	Q9ET26	Rnf114	25.7	2	17.9039	2	229	6.48	184	192.8	184.2	187	199.4	215.8	200.5	211.2	197	194.8	208	192.3	216.9	208.3	211.5	199
E3 ubiquitin-protein ligase RNF123	Q5XPI3	Rnf123	148.6	2	3.04414	2	1314	12.36	289.6	304.4	311.8	306.3	312.5	306	315.7	307	336.1	326.9	325.8	330.6	294	302.2	307.8	299.4
E3 ubiquitin-protein ligase RNF126	Q91YL2	Rnf126	34.1	3	14.377	3	313	10.01	573.8	553.9	562.6	549.2	589.5	564.5	581.1	583.5	556.5	612.2	585.5	585.2	555.7	609.3	558	592.1
E3 ubiquitin-protein ligase RNF14	Q9JI90	Rnf14	54.9	11	22.268	15	485	44.17	1879	1800.7	1871.4	1873.6	1960.3	1947.2	1978.3	2006.8	2059.8	1987.5	2092.3	2033.1	1987.9	1924.5	1939.9	1947.7
E3 ubiquitin-protein ligase RNF185	Q91YT2	Rnf185	20.5	2	13.5417	2	192	0	161.8	160.5	180.4	188.4	177	165.1	168.5	163.9	160.8	173.7	184.9	171.6	170.2	183.1	159.7	141.7
E3 ubiquitin-protein ligase RNF25	Q9QZR0	Rnf25	51.2	3	8.99123	3	456	5.51	394.1	397.9	383.8	382.1	389.7	365.3	387.9	368.3	377.6	382.7	391.9	360.8	389.5	353.3	395.5	349.4
E3 ubiquitin-protein ligase RNF31	Q924T7	Rnf31	119.2	2	3.75235	3	1066	5.28
E3 ubiquitin-protein ligase SH3RF1	Q69ZI1	Sh3rf1	93.4	3	5.15695	3	892	10.98	199.9	184.5	198.6	201	208	224.6	199.9	214.3	209.9	188.6	198.8	192.8	203.2	207.1	181.3	195
E3 ubiquitin-protein ligase synoviolin	Q9DBY1	Syvn1	67.3	2	5.39216	2	612	5.06	171.7	178.6	191.5	166	191.8	183	184.1	190.1	180	189.9	193.7	195.2	180.9	182.5	181	178.4
E3 ubiquitin-protein ligase TRIM23	Q8BGX0	Trim23	63.9	2	3.65854	2	574	2.1	138.2	141.1	143.9	141	140.9	142.9	132.6	127.7	143.9	140.1	142.8	146.8	132	138	136.5	132.8
E3 ubiquitin-protein ligase TRIM32	Q8CH72	Trim32	72	12	22.2901	15	655	50.36	2324.6	2305.4	2337.3	2327.8	2261.8	2288.9	2263.2	2335.6	2242.5	2240.9	2179.7	2337.7	2199.3	2254	2304.8	2272
E3 ubiquitin-protein ligase TRIM9	Q8C7M3	Trim9	90.8	13	17.8703	15	817	40.27	1925.4	1966.6	1973.2	1935.2	1853.3	1924.3	1948	1944.2	1999.6	1992.9	2006.7	2065.3	1898.6	1950.2	1854.9	1928.6
E3 ubiquitin-protein ligase TRIP12	G5E870	Trip12	224	4	3.11111	4	2025	14.58	395.2	424.1	422.2	420.6	420.8	399.4	394	418.3	426.6	457.2	410.3	449.6	394.4	418	427.5	411.2
E3 ubiquitin-protein ligase UBR1	O70481	Ubr1	200.1	7	5.86227	7	1757	18.21	572.8	530.4	558.4	559.3	555.7	532.5	537.3	554	556	546.2	538.2	555.3	526.6	553.5	551.5	581
E3 ubiquitin-protein ligase UBR2	Q6WKZ8	Ubr2	199	2	1.65242	4	1755	12.98	267.3	290.8	298.3	288.6	275.9	264.8	284	279.5	274.5	274.7	294.3	282.9	279.5	261.1	300.5	271.6
E3 ubiquitin-protein ligase UBR3	Q5U430	Ubr3	212.6	8	5.39968	9	1889	11.04	879.3	861.7	848.3	828.7	863	814.6	807.3	827	870.1	856.4	846.3	843	829.3	830.5	817.1	819
E3 ubiquitin-protein ligase UBR4	A2AN08	Ubr4	571.9	66	17.6834	81	5180	205.96	5985.7	6133.6	6058.6	6028.1	6034.7	5943.5	5989.4	5972.2	6220.2	6207.6	6173.7	6326.4	5846.1	5949.2	5933.5	5912.6
E3 ubiquitin-protein ligase UBR5	Q80TP3	Ubr5	308.2	2	1.46848	2	2792	5.11	47.2	52.6	50.9	48.9	56.7	55	49.9	55.3	47.5	40.6	45.6	44.3	53.8	41.3	51.5	52
E3 ubiquitin-protein transferase MAEA	Q4VC33	Maea	45.3	3	11.8687	4	396	11.12	172.7	145.2	159.8	151.3	161.8	157	154.4	154.2	166.3	172.7	169	178.8	163.7	154.9	158	157.1
E3 UFM1-protein ligase 1	Q8CCJ3	Ufl1	89.5	8	14.8802	10	793	31.07	737.7	807.2	729.3	715.5	723.4	707.9	694.4	686.6	712.8	739.2	747.2	749.6	685	704.2	734.3	697.8
Early endosome antigen 1	Q8BL66	Eea1	160.8	70	52.3033	99	1411	267.32	14564.6	14479.7	14186.7	14199	14570.6	14501.1	14143.1	14282.2	13885.1	14050.1	14233.8	13963.4	14248	14106.3	14074.1	14315.6
EARP and GARP complex-interacting protein 1	Q8K0G5	Eipr1	43.1	8	26.6839	13	386	40.17	1552.6	1549.5	1520.5	1487.1	1460.3	1387.6	1489	1463.5	1464.4	1588.5	1520.2	1538.2	1483.7	1562.4	1496.7	1551.2
Echinoderm microtubule-associated protein-like 1	Q05BC3	Eml1	89.6	8	10.0737	9	814	23.29	818.5	822.6	809.1	828.3	868.4	841.8	840.4	824.3	833.1	828.3	827.8	844.6	797.1	799.9	820.6	834.2
Echinoderm microtubule-associated protein-like 2	Q7TNG5	Eml2	70.7	18	33.8983	26	649	79.88	3432.1	3590.4	3617.7	3569.6	3442.7	3452.2	3382.5	3356.8	3477.5	3536.1	3657.2	3560.9	3445.8	3396	3498.6	3559.1
Echinoderm microtubule-associated protein-like 4	Q3UMY5	Eml4	110	6	7.38866	6	988	17.22	198.8	184.2	197.4	199.6	211.6	200.4	198.2	192.8	229.1	236.2	225.4	240.4	196.5	200.5	213.4	191.4
Ectonucleoside triphosphate diphosphohydrolase 1	P55772	Entpd1	57.2	3	11.7647	3	510	9.04	140.4	153.8	150	133.7	140	149	142.6	136.2	136.7	141.6	147.5	136.6	137.1	126.9	139	146.8
Ectonucleoside triphosphate diphosphohydrolase 2	O55026	Entpd2	54.3	7	14.9495	12	495	40.67	1293.4	1227.2	1232.7	1266.6	1258	1239.2	1234.5	1242.3	1212.2	1266.2	1246.7	1260.4	1169.7	1196.2	1250.4	1185.1
Ectonucleoside triphosphate diphosphohydrolase 5	Q9WUZ9	Entpd5	47.1	4	6.79157	5	427	3.89	421.3	461.4	433.2	412.2	429.6	439.2	410	415.7	410.6	428	464.8	448.4	468.8	429	419.5	431.6
Ectonucleotide pyrophosphatase/phosphodiesterase family member 2	Q9R1E6	Enpp2	98.8	9	15.1972	10	862	23.25	833.1	852.8	823.7	890.2	825.4	793.6	830.1	789.5	957.9	855.4	744.3	898.3	808.3	847.1	933	961.9
Ectonucleotide pyrophosphatase/phosphodiesterase family member 6	Q8BGN3	Enpp6	50.6	16	42.2727	31	440	93.52	1883.5	1872.8	2004.7	2100.2	1878.5	1964.1	2112	2052.4	1970.5	1929.4	1728.9	1924.8	2030.9	2080.7	2071.7	2128.9
Ectopic P granules protein 5 homolog	Q80TA9	Epg5	290.6	2	0.933126	2	2572	6.08	134	133.8	136.3	133.6	151.5	131.7	135.7	146.7	131.7	136.3	133.5	127.4	142.6	130.9	141.1	136.7
eEF1A lysine and N-terminal methyltransferase	Q91YR5	EEF1AKNMT	78.7	3	5.15759	4	698	8.08	61.5	65.1	68.6	60.5	59.6	69.1	67.6	64.4	64	66.7	65.2	67.4	59.6	63.1	55.5	61.4
EF-hand domain-containing protein D2	Q9D8Y0	Efhd2	26.8	17	54.5833	33	240	107.24	5328.8	5508.5	5179.9	5326.4	5064.5	5142.5	5135.5	5275.4	4809.7	4959.1	6364.5	4525.6	5618.4	5114.5	4888.5	5736.2
EH domain-binding protein 1	Q69ZW3	Ehbp1	139	15	16.4907	18	1231	48.97	1554.6	1499.6	1545.3	1540.9	1566.4	1560.9	1516.2	1541.7	1558.7	1527.7	1562.4	1498.5	1536.7	1493.7	1509.8	1482.8
EH domain-containing protein 1	Q9WVK4	Ehd1	60.6	33	71.5356	61	534	218.5	9224.5	9539.4	9358.8	9173.2	9030.6	8845.8	9013.9	9134.3	9252.7	9022.7	9441.9	9189.3	8927.2	9123.5	9153	9165.3
EH domain-containing protein 2	Q8BH64	Ehd2	61.1	6	18.232	8	543	19.76	56.4	68	47.4	52.2	57.4	49	40.7	55.6	45.9	59.6	68	65.2	50.6	41.5	60.3	49.7
EH domain-containing protein 3	Q9QXY6	Ehd3	60.8	31	72.5234	58	535	189.02	4843.4	4835	4878.1	4743	4682.3	4632.8	4793.1	4608.2	4597.1	4793	4646.9	4511	4720.5	4793.9	4759.7	4797.3
EH domain-containing protein 4	Q9EQP2	Ehd4	61.4	13	31.0536	13	541	40.34	697.5	726.3	696.6	704.9	678.8	640.6	649.2	660.6	647.2	641.1	731.5	681.6	657.3	654.1	661.5	685.1
eIF-2-alpha kinase activator GCN1	E9PVA8	Gcn1	292.8	36	17.8959	48	2671	136.81	3070.2	3106.2	3185.7	3083.2	3137.8	3118.1	3127.6	3130.9	3183.5	3204.3	3219.6	3307	3071.2	3120.5	3054.1	3173
EKC/KEOPS complex subunit Tp53rk	Q99PW4	Tp53rk	27.4	2	9.42623	2	244	4.49	259.4	267.5	258.2	197.3	213.6	196.2	201.3	203.1	204.1	184.2	204.3	192.1	203.5	191.5	199.6	203.6
ELAV-like protein 1	P70372	Elavl1	36.1	12	45.092	22	326	49.38	1998.5	2046.7	1926.9	2023.4	2049.5	2090.6	2091.9	2040.7	2017.9	1968.3	1997.1	2045.4	2187.9	2009.6	2030.8	2184.6
ELAV-like protein 2	Q60899	Elavl2	39.6	13	38.8889	24	360	69.46	335.2	320.2	321.7	357.5	339.1	316.3	321.2	321	327.9	350.3	335	336.8	330.3	323	324.9	340.4
ELAV-like protein 3	Q60900	Elavl3	39.5	14	43.8692	27	367	82.96	3453.7	3448.4	3332.9	3540.9	3473.1	3536.1	3505.1	3525.5	3604.5	3574.8	3847.1	3609.7	3532.8	3452.1	3272.6	3435.2
ELAV-like protein 4	Q61701	Elavl4	42.3	12	36.1039	23	385	62.67	97.9	93.9	84.3	93.2	99.1	95.6	91.1	97.3	96.1	90.6	104.8	93.6	98	86.6	88.8	82.2
Electrogenic sodium bicarbonate cotransporter 1	O88343	Slc4a4	121.4	33	31.696	61	1079	198.46	12359.8	12106.7	12070.2	12395.6	13392.6	13673.8	13151.7	13586.7	12072.3	12808.8	12379.8	12119.9	13276.4	13422.5	13468.4	12793.3
Electron transfer flavoprotein subunit alpha, mitochondrial	Q99LC5	Etfa	35	22	69.97	54	333	180.34	8615.6	8714.3	8696.6	8797.4	8624.3	8276.2	8162.2	8436	8789.2	8370.5	8373.5	8460	8174.8	8336.5	8817.2	8942.3
Electron transfer flavoprotein subunit beta	Q9DCW4	Etfb	27.6	19	77.6471	46	255	148.21	7980.1	8258.1	8116.8	8109.7	8026.1	7875.1	7758.8	7885.5	8221.3	7899.7	7689.8	7845.7	7545.5	7701.3	8062	8368.3
Electron transfer flavoprotein-ubiquinone oxidoreductase, mitochondrial	Q921G7	Etfdh	68	30	53.7338	55	616	171.34	9659.6	9550.4	9766.6	9819.3	9818.3	9708.1	9903.8	9625	9705.9	9389.7	9534.8	9390	9825.2	9796.6	10015.4	9803.9
Electroneutral sodium bicarbonate exchanger 1	Q8JZR6	Slc4a8	122.3	14	13.5904	20	1089	60.26	763.5	761.3	774.5	800.1	796	791.6	794.2	769.3	819.6	805.2	837.9	799.6	797	800.2	835.1	792.9
ELKS/Rab6-interacting/CAST family member 1	Q99MI1	Erc1	128.3	37	32.5893	55	1120	162.77	3507.5	3471.1	3453.7	3444.2	3713.3	3712	3722.6	3692.6	3955.2	3840.7	4091.3	4067.6	3753.9	3692.8	3610.8	3733.7
ELMO domain-containing protein 1	Q3V1U8	Elmod1	38	7	28.8344	9	326	31.58	1545.6	1501.4	1536.1	1465.8	1539.1	1545.3	1572.9	1565.5	1510.6	1461.1	1422.1	1518.5	1468.4	1549	1501.8	1475.9
Elongation factor 1-alpha 1	P10126	Eef1a1	50.1	38	74.8918	239	462	677.59	32897.9	32125.2	33016	32956.9	33762	33044	33357.9	33212.9	35730.1	35166.9	34968.2	36167.1	33984.9	34038	34441.2	34338.2
Elongation factor 1-alpha 2	P62631	Eef1a2	50.4	37	66.7387	181	463	572.49	15439.8	14829	15451.9	15371.9	15459.8	15575	15391.7	15311.5	16077	16379.7	16267.8	16071.7	15858.7	15351.3	15495.1	15410.9
Elongation factor 1-beta	O70251	Eef1b	24.7	12	52.4444	27	225	100.51	5319.5	5304.5	5277.7	5359.1	5634.9	5742.6	5481.4	5579.1	5902.5	5968.8	6312.3	6159.1	5682.2	5414.4	5512.2	5642.8
Elongation factor 1-delta	P57776	Eef1d	31.3	16	58.7189	28	281	70.65	4205.3	4459.5	4352.9	4457	4434.2	4507.8	4429.7	4418.1	4796.1	4601.6	4991.3	4811.1	4557.4	4512.3	4423.5	4655.1
Elongation factor 1-gamma	Q9D8N0	Eef1g	50	27	59.9542	76	437	234.63	13511.8	13487.9	13487.4	13721.7	13544.1	13743.5	13468.2	13682	15035.7	15221.4	15355.6	15303.3	13622.2	13667.9	13830.2	13554.7
Elongation factor 2	P58252	Eef2	95.3	66	74.7086	181	858	589.83	24774.5	25312.2	24837.7	24609.6	24538.9	24178.7	24835.3	24276.8	27068.9	26956.1	25996.4	27797.7	24654.8	25900.2	25184.1	24671.1
Elongation factor G, mitochondrial	Q8K0D5	Gfm1	83.5	16	25.4328	21	751	68.59	3710.8	3857.5	3605.2	3507.5	3670.1	3353.4	3475.5	3444.1	3490.6	3723.9	3645.1	3655.2	3313.2	3555.1	3660.6	3644.9
Elongation factor Ts, mitochondrial	Q9CZR8	Tsfm	35.3	16	58.0247	29	324	106.57	2882.7	2803.5	2793.3	2842.6	2888.4	2772.9	2752.1	2802.2	2816	2743.4	2894.2	2746	2766.9	2731.2	2708.5	2797.7
Elongation factor Tu, mitochondrial	Q8BFR5	Tufm	49.5	34	74.7788	83	452	305.16	12853.7	12570.6	12901.6	12925.1	12931.4	12759.2	12662.6	12804.6	13115.5	13194.1	13166.3	12873.2	12685.6	12621.7	12787.1	12829.5
Elongation factor-like GTPase 1	Q8C0D5	Efl1	125.7	12	14.197	15	1127	34.26	956.5	1005.7	1006.7	981.1	1043.4	994.7	965.5	1004.6	1030.7	998.8	989.6	1044.1	987.1	1007	983.1	1008.8
Elongation of very long chain fatty acids protein 4	Q9EQC4	Elovl4	36.5	2	5.76923	3	312	5.81	512.4	499.2	515.8	461.3	524.5	511.4	512.7	525.5	518.5	543.8	511.8	581.4	484.2	492.7	524.1	505.1
Elongator complex protein 1	Q7TT37	Elp1	149.5	13	12.3781	14	1333	29.99	1349.5	1299.8	1322.5	1264	1326.6	1270.6	1345.2	1280.5	1353.7	1289	1357.8	1311.8	1275.4	1251.5	1304.4	1304.3
Elongator complex protein 2	Q91WG4	Elp2	93	10	14.4404	10	831	27.81	987.2	942	939.8	921.6	990.5	918.4	938.3	933.7	925.7	909.6	997.2	921.9	935.7	926.1	927.1	941.7
Elongator complex protein 3	Q9CZX0	Elp3	62.3	7	14.4424	7	547	18.57	697.3	691.3	695.8	691.2	692	694.3	684.3	710.2	665	675.8	679.2	696.6	668	669.6	674.8	693.6
Elongator complex protein 4	Q9ER73	Elp4	46.3	7	21.09	7	422	21.11	1123.1	1148.1	1121.9	1122.1	1141.2	1144.5	1069.7	1156.8	1116.2	1115.1	1128	1144.6	1080.9	1129.9	1121	1092.3
Elongin-B	P62869	Elob	13.2	9	89.8305	25	118	79.39	4407.6	4440.2	4430.3	4324.3	4338.9	4409.1	4329.5	4565.5	4519	4666.6	4463.6	4596.3	4481.6	4534.7	4424.1	4639.2
Elongin-C	P83940	Eloc	12.5	7	66.0714	15	112	60.99	2063.9	2188.1	2259	2247	2191.1	2340.4	2154.4	2208.6	2412.7	2251.9	2525.6	2374.3	2334.7	2187.8	2057.7	2158.6
Embigin	P21995	Emb	37	6	17.2727	8	330	23.21	945	992.3	986.3	1002.5	981.5	1040.4	947.1	972.4	969.1	962.8	1053.1	922.1	987.6	964.2	1002.5	984.2
Emerin	O08579	Emd	29.4	11	59.8456	12	259	48.42	1338.9	1340.5	1308.8	1274.8	1427.6	1314.2	1255.7	1323.6	1265.1	1444.2	1317.9	1358.1	1259	1326.3	1311.8	1319.6
Ena/VASP-like protein	P70429	Evl	44.3	13	43.4783	19	414	43.29	1294.5	1328.7	1380.7	1361.1	1392.1	1347.6	1334.4	1378.1	1363.2	1424.2	1440.9	1399.8	1340.1	1349.8	1313.2	1349.9
Endonuclease domain-containing 1 protein	Q8C522	Endod1	55.2	14	34.7305	23	501	72.61	1682.1	1655.5	1700.6	1715.8	1608.4	1639.6	1710	1648.9	1636.7	1593.9	1569.5	1553	1666.9	1600.2	1660.8	1661.4
Endonuclease G, mitochondrial	O08600	Endog	32.2	4	14.6259	6	294	18.38	415.3	431	420.2	392.4	444.6	424	421.3	442.9	438.8	448.2	449.6	425.7	418.5	397.2	414.5	434.5
Endophilin-A1	Q62420	Sh3gl2	39.9	29	55.9659	114	352	335.91	24246	22878	23510.1	22983.5	23824.3	24173.3	24177	23594	21630.7	21540.3	22064	20302.6	24651.4	24081.6	23435.7	24068.9
Endophilin-A2	Q62419	Sh3gl1	41.5	27	55.163	63	368	173.64	4500.2	4418.3	4384.3	4354.7	4565.1	4515.3	4432.6	4579.3	4581.4	4661.2	4838	4594.8	4561.8	4372.1	4424.6	4452.2
Endophilin-A3	Q62421	Sh3gl3	38.9	17	59.6542	27	347	82.87	3842.7	3668.8	3744.9	3998.2	3713.7	3662.4	3622.3	3622.8	3255	3371.3	3502.3	3227.2	3712.8	3536.5	3586.9	3788.9
Endophilin-B1	Q9JK48	Sh3glb1	40.8	18	45.7534	33	365	102.49	3255.8	3198	3329.4	3230.4	3404.6	3377.3	3473.7	3369.1	3472.9	3481.2	3584.4	3624.8	3487.7	3330.2	3427.7	3402.6
Endophilin-B2	Q8R3V5	Sh3glb2	44.5	27	58.25	49	400	161.79	6155.9	6106.1	6274.8	6127	6266.7	6302.3	6227.1	6262.8	5832.9	5927.2	6131.8	5728.9	6225	6061.3	5997.1	6056.7
Endoplasmic reticulum chaperone BiP	P20029	Hspa5	72.4	45	60.7634	152	655	480.35	24576.7	25685.8	25017.7	24693.1	25282.9	25457.4	24799	25545.1	27138.6	26133.5	26244.9	27102.8	24509.7	25359.2	25356.9	26128.2
Endoplasmic reticulum junction formation protein lunapark	Q7TQ95	Lnpk	47.5	10	36.7059	18	425	59.39	2676.6	2626.6	2644.2	2645.7	2725.7	2773.2	2797.4	2687.7	2752.7	2737.8	2689.1	2806.1	2710.1	2749.2	2747.9	2623.1
Endoplasmic reticulum lectin 1	Q8VEH8	Erlec1	54.9	5	13.8716	7	483	15.3	615.6	589.9	626.6	606.5	644.9	609.9	603.7	592	629.1	630.7	621.9	651.8	603.9	595.1	593.1	581.9
Endoplasmic reticulum metallopeptidase 1	Q3UVK0	Ermp1	100.1	10	15.2561	14	898	49.8	2058.9	2066.2	2096.4	2051.5	2109.2	1975.4	2064.2	2099.2	2013.6	2127.8	1959.6	2156.3	2001.1	2109.9	2081.6	2115.7
Endoplasmic reticulum resident protein 29	P57759	Erp29	28.8	17	66.7939	34	262	105.87	4993.3	5064.7	4915.7	4999.1	5049.9	4934.4	4909.9	5048.1	5190.5	5308.3	5373.4	5351.5	4906.5	4900.1	4826.6	4995.5
Endoplasmic reticulum resident protein 44	Q9D1Q6	Erp44	46.8	14	50.7389	21	406	70.23	2545.8	2691.7	2706.5	2762	2691.7	2642.2	2642.7	2625.3	3004.9	2984	3012.6	3056.3	2722.9	2634.5	2647.3	2696.7
Endoplasmic reticulum-Golgi intermediate compartment protein 1	Q9DC16	Ergic1	32.5	8	32.069	10	290	27.45	1232.8	1235.4	1209.9	1220.9	1227.5	1236.1	1195.9	1218.8	1251.4	1276.2	1275	1299.1	1191.1	1220.6	1245.7	1223
Endoplasmin	P08113	Hsp90b1	92.4	51	56.2344	125	802	382.7	18513.9	19668.3	18466.6	18688.6	18617.7	18471.6	18252.8	18194.4	21271.4	20209.9	20351	21289.2	18273.3	18592.5	19147.1	19287.9
Endothelial cell-selective adhesion molecule	Q925F2	Esam	41.8	3	12.9442	3	394	8.86	150.7	168.2	163.4	156.9	159.9	148.4	155.3	175.3	161.7	163	177.9	181.5	162.1	157.7	165.2	159.8
Endothelial differentiation-related factor 1	Q9JMG1	Edf1	16.4	8	46.6216	9	148	22.01	1818.7	1834.6	1853	1870.8	1899	1991.3	1912.7	1923.2	1970.1	1854.4	1970.5	2029.6	1885.5	1852.1	1827.1	1907.9
Engulfment and cell motility protein 1	Q8BPU7	Elmo1	83.9	11	14.4429	21	727	66.06	567.5	557.2	592.7	556.7	561.1	578.4	576.9	608.8	606.8	595.8	633.5	590	576.4	582.3	575	599.5
Engulfment and cell motility protein 2	Q8BHL5	Elmo2	83.8	26	39.4809	49	732	175.51	5826.5	6002.5	5926.3	5844.9	5844.1	5724.3	6024.7	5779	6043.2	5910.7	5476.7	6185.7	5711.2	5905.7	5714.5	5563.3
Enhancer of mRNA-decapping protein 3	Q8K2D3	Edc3	55.9	4	7.67717	4	508	8.5	225.9	227.8	223.3	231.9	228.1	237.2	216.8	232.5	223.1	230.5	237.4	218.6	214.2	199.8	206.8	220
Enhancer of mRNA-decapping protein 4	Q3UJB9	Edc4	152.4	14	15.8606	18	1406	77.37	1401.2	1386.2	1330	1375.6	1415	1429.6	1405.9	1335.5	1432.9	1387.6	1437.9	1456.5	1352.1	1314.4	1339.1	1311.4
Enhancer of rudimentary homolog	P84089	Erh	12.3	7	47.1154	10	104	26.61	1102.1	1131.6	1118.7	1172.7	1212.7	1165	1243.3	1143.4	1300.9	1249.9	1421.3	1290.1	1249.6	1140.4	1114	1156.2
Enolase-phosphatase E1	Q8BGB7	Enoph1	28.6	7	19.4553	9	257	22.49	922.4	895	915.4	890.7	891.3	839.1	874.9	887.5	866	915	904.9	867.5	908.8	859.8	879	939.6
Enoyl-[acyl-carrier-protein] reductase, mitochondrial	Q9DCS3	Mecr	40.3	14	66.4879	34	373	117.52	3345.7	3272.8	3270.3	3381.7	3409.9	3581.2	3430.5	3380.3	3490.5	3445.3	3615.2	3444.5	3496.8	3392.7	3491.9	3402.2
Enoyl-CoA delta isomerase 1, mitochondrial	P42125	Eci1	32.2	13	57.4394	27	289	92.8	3080	3191.9	3145.5	3319.7	2996	2995.2	2852.3	2897.2	2906.4	2821.3	2997.4	2786.6	2921.4	2850.9	3099.4	3133.6
Enoyl-CoA delta isomerase 2, mitochondrial	Q9WUR2	Eci2	43.2	12	43.734	18	391	56.82	1852.7	1806.7	1814.1	1900.2	1815	1755.9	1795.7	1793	1911.1	1869.6	1907.2	1868.6	1742.6	1738.3	1765.5	1753.5
Enoyl-CoA hydratase domain-containing protein 2, mitochondrial	Q3TLP5	Echdc2	31.8	2	12.8378	4	296	17.09	378.5	398.9	350.5	400.9	361.9	348.2	393.9	354.3	361.3	376	406.4	366.9	378.1	363	365.7	379.4
Enoyl-CoA hydratase, mitochondrial	Q8BH95	Echs1	31.5	21	67.931	42	290	142.01	7105.7	7094.1	7236.7	7312.6	7106.7	7073.1	6941.5	7021.3	6969.2	7073.4	7101.9	6777.6	6921.1	6854.6	6997.7	6965.2
Ensconsin	O88735	Map7	82	8	10.8219	11	730	15.82	748.3	702	655.8	616	683	621.4	660.3	625.7	615.8	602	658.5	609.8	676.9	683.3	628.6	595.7
Ephexin-1	Q8CHT1	Ngef	82.1	18	29.0141	20	710	50.94	1365.2	1395.2	1335.5	1409.1	1424.6	1411	1379.3	1377.5	1377.1	1477.7	1546.2	1451.1	1405.5	1391.8	1370.7	1357.5
Ephrin type-A receptor 4	Q03137	Epha4	109.7	35	46.5517	52	986	186.71	7048.1	7276.8	7071.9	6763.3	6995.7	7066.3	7439.8	7266.7	7095.7	7160.3	6110	7360.4	6913	7258.9	7150.3	6852.9
Ephrin type-A receptor 5	Q60629	Epha5	97	6	6.84932	7	876	20.34	374	355.1	390.7	367.7	391.9	402.1	408.1	371.9	410.8	411.5	406	424.6	395.5	412.1	398.1	382.3
Ephrin type-A receptor 6	Q62413	Epha6	116.1	5	5.41063	5	1035	15.28	340.8	363.2	349.8	359.2	381.8	349	373.1	358.8	378.1	358	358	374.1	342	324.5	364.7	355.8
Ephrin type-A receptor 7	Q61772	Epha7	111.8	13	13.8277	16	998	39.72	1033.1	1065.4	1026.7	1016.2	1126.4	1040.7	1045.7	1077.9	1026.4	1034.5	941.4	1108.5	991.3	1056.4	1036.4	1013
Ephrin type-B receptor 2	P54763	Ephb2	109.8	14	18.2556	20	986	54.97	2129.3	2145.8	2124.4	2131.6	2208.1	2193.3	2195.5	2166.6	2242.9	2275.2	2120.7	2383.3	2103.5	2130.2	2126.2	2107.7
Ephrin type-B receptor 3	P54754	Ephb3	109.6	5	5.94159	6	993	19.39	561.9	567.5	563.3	561.2	546.8	593.4	593.4	591.1	618.9	650.7	577.9	683.5	575.7	581.3	566.1	526.7
Ephrin-B1	P52795	Efnb1	37.8	3	8.98551	3	345	6.08	153.8	139.1	155.8	149.6	145.8	139	126.7	135.1	137.8	142.3	154.1	146.3	138.2	153.6	138.4	136.3
Ephrin-B2	P52800	Efnb2	37.2	4	18.1548	6	336	22.54	714.6	658.7	650.3	693.4	723.6	706.6	667.3	695	759.6	833.8	935.1	763	751.1	619.7	677.3	690
Ephrin-B3	O35393	Efnb3	35.9	5	17.6471	5	340	7.5	953.9	1033.9	986.2	968.9	919.6	900.6	925.8	999.9	903.6	940.9	841.8	938.1	861.4	938.7	930.4	1016.7
Epidermal growth factor receptor	Q01279	Egfr	134.8	7	7.93388	7	1210	22.63	670.7	660.9	656.5	641	669.9	591.4	633.7	608.1	635	700.1	703.8	654.4	637.6	649.5	669.7	665.1
Epidermal growth factor receptor kinase substrate 8	Q08509	Eps8	91.7	7	10.9622	11	821	31.63	1505.6	1527	1491.6	1532.3	1477.7	1533.9	1483.1	1550.5	1494.9	1525.5	1499.9	1515.3	1492.8	1448.8	1481.2	1431.7
Epidermal growth factor receptor substrate 15	P42567	Eps15	98.4	16	23.4114	23	897	67.81	2652.5	2714.2	2698.3	2740.7	2709.9	2672.8	2729	2759.4	2730.9	2708.9	2643	2731.1	2694.1	2739.6	2689.7	2728.5
Epidermal growth factor receptor substrate 15-like 1	Q60902	Eps15l1	99.2	39	50.9372	60	907	197.23	6527.8	6391.8	6271.7	6264.4	6346.5	6343.7	6366.2	6281.5	6175.6	6256	6467.7	6208.3	6407.8	6199.2	6382.3	6312.7
Epimerase family protein SDR39U1	Q5M8N4	Sdr39u1	31.4	7	20.4778	10	293	25.91	1150.6	1170.9	1167.7	1164	1175.2	1138.8	1133.1	1147.1	1073.2	1125.8	1084.7	1096.9	1109.8	1115.3	1146.3	1121.5
EPM2A-interacting protein 1	Q8VEH5	Epm2aip1	70.1	19	39.604	31	606	111.53	3132.1	3134.9	3147.7	3142.5	3153.6	3021.8	3049.7	3053.2	3159.1	3291.2	3305	3176.8	3101.6	3049.8	3107.1	3076
Epoxide hydrolase 1	Q9D379	Ephx1	52.5	11	25.9341	15	455	33.22	1468.1	1645.9	1427.6	1510.6	1333.2	1352.3	1356.2	1292.1	1466.7	1342.3	1306.6	1348.8	1289.1	1329.2	1474.3	1359.8
Epsin-1	Q80VP1	Epn1	60.2	18	35.6522	43	575	184.51	5801.3	5515.6	5614.1	5654.9	5572.9	5685.6	5791.8	5652.6	5227.9	5207.2	5317.2	5055.9	5728.6	5570.4	5635.5	5501.2
Epsin-2	Q8CHU3	Epn2	63.4	21	44.0336	31	595	116.35	4216.6	4234.7	4249.9	4231.7	4257.3	4299.2	4375	4262.3	4194.5	4140	4016	4266.8	4403.8	4442.8	4358.8	4227.8
Epsin-3	Q91W69	Epn3	68.2	6	9.43396	9	636	19.09	45.6	48.4	41.1	52.5	40.8	44.2	42.8	37.4	46.1	31.3	41.7	36	35.9	35.6	41.6	49.7
ER membrane protein complex subunit 1	Q8C7X2	Emc1	111.5	15	21.665	20	997	72.64	2184.9	2194.6	2146.7	2174.7	2181.2	2053.2	2137.4	2091	2308.9	2332.5	2253.6	2311.7	2143.2	2142.9	2148.9	2140.2
ER membrane protein complex subunit 10	Q3TAS6	Emc10	27	4	18.9922	4	258	10.62	433.8	457.6	438.7	422.7	399.5	412.8	409.2	417.3	440.3	464.4	455.1	466.3	409.1	413.4	421.2	415.3
ER membrane protein complex subunit 2	Q9CRD2	Emc2	34.9	9	33.3333	14	297	36.37	1441.5	1472.8	1476.5	1486.7	1481.7	1486	1460.3	1492.7	1509.3	1532.6	1527.9	1614.2	1467.3	1450.3	1467.8	1538.6
ER membrane protein complex subunit 3	Q99KI3	Emc3	30	2	13.0268	2	261	7.18	258.8	290.2	256.9	303.2	271.2	272	262.2	250.1	315.5	316.5	311.5	311.5	269.7	266.3	260.4	263.4
ER membrane protein complex subunit 4	Q9CZX9	Emc4	20.1	3	20.765	3	183	9.74	173.1	178.9	183.4	188.7	184	180.7	179.7	180.4	197.3	196.7	188.3	200.3	171.7	182.1	193	176.6
ER membrane protein complex subunit 7	Q9EP72	Emc7	26.3	6	31.1203	6	241	16.5	859.3	863.9	830.6	821.2	837.5	863.1	820.4	862	880.1	883.8	898.8	960.1	832.1	835.9	873.8	872.9
ER membrane protein complex subunit 8	O70378	Emc8	23.3	10	57.0048	14	207	41.96	1488.2	1437.8	1455.9	1471.7	1485.9	1407.8	1486.5	1475.9	1503.5	1567.6	1524.6	1606.4	1450.9	1426.2	1464.4	1422.3
Erbin	Q80TH2	Erbin	157.2	4	3.85164	7	1402	20.84
ERC protein 2	Q6PH08	Erc2	110.6	64	56.2173	111	957	338.19	17858.7	17358.3	17307.2	16900.1	17485.3	17292.1	17715.2	17486.9	17107.5	17221.9	16777.1	16828.8	17578.6	17685.6	17374.1	17478.4
ERI1 exoribonuclease 3	Q8C460	Eri3	37.2	8	26.7062	12	337	23.57	1717.5	1698	1618	1651.9	1663.1	1537.8	1621.1	1584	1600.9	1640.2	1677.1	1586	1646.7	1693.9	1668.8	1651.7
Erlin-1	Q91X78	Erlin1	39.2	12	31.6092	23	348	49.93	965.7	986.5	966.1	967.9	994.2	1060.1	1005.4	992.7	965.8	1001.1	1024.2	979.4	978.3	978.6	1019.1	946.9
Erlin-2	Q8BFZ9	Erlin2	37.8	18	56.7647	30	340	85.06	3802.4	3861.6	3697.3	3821.8	3787.7	3705.7	3709.2	3645.3	3743.4	3775.4	3677	3779.9	3560.9	3669.3	3811.8	3711.4
Ermin	Q5EBJ4	Ermn	32.1	13	60.1423	26	281	104.83	2997.3	3154.1	3258.3	3398.9	2967.5	3337.5	3535.1	3318.5	3178.8	2933.5	2521.9	3013.6	3281	3450.2	3380.4	3778
ERO1-like protein alpha	Q8R180	Ero1a	54	4	9.69828	4	464	7.71	581.1	567.1	622.4	569.2	560	542.6	545.3	564	556.1	559.6	605.9	578.9	548.5	558.8	564.4	542.1
Erythrocyte band 7 integral membrane protein	P54116	Stom	31.4	2	11.6197	2	284	2.26	162	169.4	154.3	148.1	142.4	126.9	142.9	154.2	135.9	143.4	176.4	170	142.3	136.8	129.2	154.3
Essential MCU regulator, mitochondrial	Q9DB10	Smdt1	11.5	2	28.972	5	107	5.39	425.9	475.9	450.4	411.6	426.6	385.3	422.3	409.9	424.9	439.9	412.5	424.7	431.6	487.6	431.1	396.4
Ester hydrolase C11orf54 homolog	Q91V76		35	11	36.1905	18	315	60.29	1965.7	1931.4	1962.7	1974.1	1955.7	1888.7	1947.8	1872	2000.3	2003.1	2115.3	2038.9	1971.7	1952.2	1922.8	2027.7
Estradiol 17-beta-dehydrogenase 11	Q9EQ06	Hsd17b11	32.9	8	33.8926	9	298	26.83	744.2	776.1	751.3	696.3	717.5	696.2	693.3	701.6	690.8	736	708.5	708	698.9	696.2	696.3	685.7
Estradiol 17-beta-dehydrogenase 8	P50171	Hsd17b8	26.6	7	39.7683	11	259	38.46	1242	1276.4	1279.6	1277.3	1284.8	1356.6	1316.6	1274.4	1248.2	1254.6	1218.9	1283.2	1257.6	1248.6	1262.9	1287.2
Ethanolamine kinase 1	Q9D4V0	Etnk1	42	2	10.1928	3	363	12.05	180	196.5	180.9	200.2	194.1	183.8	184.5	184.4	205	193.4	202.8	203.5	186.2	196	178.8	181
Ethanolamine-phosphate cytidylyltransferase	Q922E4	Pcyt2	45.2	13	35.1485	15	404	46.84	2115.3	2147.3	2095.1	2089.7	2092.9	2147.6	2142.4	2149.3	2094.8	2210.5	2082.7	2164.7	2086.3	2163.2	2158.4	2199
Ethylmalonyl-CoA decarboxylase	Q9D9V3	Echdc1	35.4	11	43.7888	15	322	52.62	1502.1	1548.3	1506.9	1529.5	1507.8	1505.5	1502.8	1501.3	1500.1	1514.7	1458.8	1496.1	1485.2	1475.6	1551.8	1545.8
Eukaryotic initiation factor 4A-I	P60843	Eif4a1	46.1	24	59.6059	51	406	153.32	6593	6732.2	6636.4	6775.3	6747.8	6599	6872.2	6807.2	7225.8	7330.2	7250.5	7491.7	6904.7	6820.8	6848.9	6833.3
Eukaryotic initiation factor 4A-II	P10630	Eif4a2	46.4	23	58.9681	56	407	176.92	3127.2	3161.3	3241.8	3320.9	3172.2	3233.8	3181.6	3188.4	3525.9	3546.7	3706	3492.3	3399.6	3229.1	3184.4	3235.9
Eukaryotic initiation factor 4A-III	Q91VC3	Eif4a3	46.8	15	42.5791	27	411	69.27	933.5	954.4	921	924	940.8	926.6	924	891.4	1010.4	992	1035.8	1023	935.9	906.6	928.1	939.4
Eukaryotic peptide chain release factor GTP-binding subunit ERF3A	Q8R050	Gspt1	68.6	27	44.3396	37	636	127.11	4465.1	4260.2	4371.7	4458.7	4491.1	4518.7	4572.3	4413.3	4630	4623.3	4692.5	4759.8	4494.6	4484.3	4490.2	4424.7
Eukaryotic peptide chain release factor GTP-binding subunit ERF3B	Q149F3	Gspt2	69.1	18	23.1013	22	632	60.74	604.7	602.1	607.7	633.3	635	640.9	631.4	611.9	645.1	654.1	642	692.6	613.9	628.1	636.6	615.8
Eukaryotic peptide chain release factor subunit 1	Q8BWY3	Etf1	49	7	20.8238	10	437	28.88	1559.5	1607.6	1539.8	1566.6	1538.9	1471.4	1478.6	1499.6	1584.4	1629.2	1614.1	1632.7	1548.5	1569.7	1601.7	1636.9
Eukaryotic translation elongation factor 1 epsilon-1	Q9D1M4	Eef1e1	19.8	5	35.6322	9	174	26.25	719.7	726.6	680.5	689.7	721.9	703.4	710.9	724.5	770.4	754.4	764.5	765.9	719.3	688.2	684.1	666.9
Eukaryotic translation initiation factor 1	P48024	Eif1	12.7	8	67.2566	14	113	52.5	1163.7	1147.7	1214.6	1207.1	1247.6	1260.9	1222.5	1198.2	1241.9	1274.6	1308.7	1289	1271.2	1197.7	1243	1262
Eukaryotic translation initiation factor 1A, X-chromosomal	Q8BMJ3	Eif1ax	16.4	10	75.6944	18	144	39.72	1861.1	1993.8	1944.1	1926.6	1968.7	1944	1886	1949.5	2043.3	2092.5	2114.7	2146.9	1970.2	1994.6	1920.2	2105
Eukaryotic translation initiation factor 2 subunit 1	Q6ZWX6	Eif2s1	36.1	16	60.9524	22	315	71.58	3281.6	3227	3192.8	3169.9	3302	3184.8	3269.2	3261.1	3559.3	3552.4	3600.7	3684.2	3345.9	3313.5	3358.4	3325.2
Eukaryotic translation initiation factor 2 subunit 2	Q99L45	Eif2s2	38.1	13	47.7341	22	331	69.4	2714.9	2751.6	2781.3	2787.3	2825.6	2811.9	2792.9	2869.5	3073.9	3057.9	2958.4	3212.7	2801.4	2816.4	2774.7	2801.7
Eukaryotic translation initiation factor 2 subunit 3, X-linked	Q9Z0N1	Eif2s3x	51	18	42.161	23	472	68.57	3095.5	3133.1	3173.7	3234.5	3273.7	3242	3219	3269	3515.7	3485.6	3440.8	3720.5	3273.2	3255	3301.4	3286
Eukaryotic translation initiation factor 2A	Q8BJW6	Eif2a	64.4	6	12.5645	6	581	14.79	350.9	370.8	386.4	362.7	358.7	329.2	367.7	338.4	366.5	366.4	346.1	382.3	333.7	351.5	351.8	376.2
Eukaryotic translation initiation factor 2D	Q61211	Eif2d	62.8	2	7.01754	2	570	8.81	99.3	93.5	98	91.9	105.2	95.5	87	86.3	111.9	109.1	100.5	97.5	103.6	95.7	101.5	84.5
Eukaryotic translation initiation factor 3 subunit A	P23116	Eif3a	161.8	58	44.7173	95	1344	226.67	9197.8	9179.5	9208.9	9407.4	9376.9	9462	9283.1	9282.1	9746.8	9839.4	9885.1	10216.5	9310.9	9296.1	9369.1	9295.9
Eukaryotic translation initiation factor 3 subunit B	Q8JZQ9	Eif3b	91.3	25	40.9714	38	803	128.65	3571.4	3652.5	3744.2	3737.2	3755	3748.5	3708.3	3710.2	3914.9	3897.5	3989.3	4076.4	3782.8	3681	3698.4	3748.9
Eukaryotic translation initiation factor 3 subunit C	Q8R1B4	Eif3c	105.5	25	28.8694	35	911	103.61	5076.3	5294.9	5149.8	5236.4	5329.9	5384.3	5299.3	5253.4	5497	5633.9	5391.1	5719.8	5250.2	5314	5361.2	5205.4
Eukaryotic translation initiation factor 3 subunit D	O70194	Eif3d	63.9	16	40.146	23	548	76.11	1927.7	2037.1	1947.1	2009.9	1985.2	1953.5	1925.2	1934.3	2107	2085.7	2175.7	2124.4	1928	1952.4	1938.8	1964.2
Eukaryotic translation initiation factor 3 subunit E	P60229	Eif3e	52.2	20	50.1124	28	445	74.97	2088.9	2234.6	2051.3	2138	2061.1	1985.7	2012.3	2040.7	2158.4	2190.3	2258.2	2281.4	2040.9	2051.1	2065.4	2063.5
Eukaryotic translation initiation factor 3 subunit F	Q9DCH4	Eif3f	38	9	26.5928	12	361	39.51	1886.5	1900.4	1887	1883.4	1875.2	1791.7	1826.2	1844.5	2033.6	2000	2072.4	2082.5	1895.9	1903.4	1880.6	1968.5
Eukaryotic translation initiation factor 3 subunit G	Q9Z1D1	Eif3g	35.6	8	34.375	11	320	31.86	1514.6	1470.7	1475.7	1490.5	1548.1	1560.1	1559.9	1535.6	1619.7	1497.1	1622.7	1644.2	1611.6	1501.6	1517	1533.5
Eukaryotic translation initiation factor 3 subunit H	Q91WK2	Eif3h	39.8	11	36.0795	17	352	53.22	2126	2129.2	2143.3	2130.4	2240.1	2102.8	2196.8	2202.1	2325.8	2286.9	2430.8	2393.1	2297.6	2136	2144.8	2178.9
Eukaryotic translation initiation factor 3 subunit I	Q9QZD9	Eif3i	36.4	13	55.0769	19	325	64.26	2085.4	2095.5	2044.9	2091	2076	2112.5	2055.7	2074.9	2206.1	2163.6	2276.3	2268.2	2153.9	2058.6	2039.1	2057.4
Eukaryotic translation initiation factor 3 subunit J-B	Q66JS6	Eif3j2	29.5	14	55.1331	18	263	63.2	2462.4	2491.2	2542.6	2537.7	2619.3	2668.9	2706.5	2634.7	2786.5	2788.2	2917.8	2870.1	2705.2	2595.3	2615.7	2707.6
Eukaryotic translation initiation factor 3 subunit K	Q9DBZ5	Eif3k	25.1	6	36.6972	7	218	21.03	1972.9	2144	2085.4	2201.6	2077.7	2061.4	2053.7	2186.9	2254	2108.7	2110.2	2194.8	2026.8	2001.2	1913.3	2039.1
Eukaryotic translation initiation factor 3 subunit L	Q8QZY1	Eif3l	66.6	19	36.7021	27	564	74.42	2843	2721.9	2460.1	2475.9	2509.3	2489	2446.9	2443.3	2620.2	2624.7	2623.9	2640.3	2446.6	2530.7	2549.8	2508.1
Eukaryotic translation initiation factor 3 subunit M	Q99JX4	Eif3m	42.5	8	26.738	9	374	20.75	804.9	904.7	830.8	862.5	819.2	777.5	829.8	813.9	867	900.6	866.9	875.9	831.3	861	852.9	830.1
Eukaryotic translation initiation factor 4 gamma 1	Q6NZJ6	Eif4g1	176	38	29.125	47	1600	123.53	6175	6461.5	6221.5	6395.2	6666.1	6957.1	7099.1	7264.9	6573.5	7059.6	7218.9	6922.2	6363.1	6442.2	6177.5	6433.8
Eukaryotic translation initiation factor 4 gamma 2	Q62448	Eif4g2	102	27	33.5541	36	906	70.85	3518.3	3621.8	3495.4	3527.7	3532.7	3562.8	3502.1	3521.6	3604.2	3601.5	3569.1	3739.4	3471.5	3547	3551	3481.4
Eukaryotic translation initiation factor 4 gamma 3	Q80XI3	Eif4g3	174.8	34	23.6859	40	1579	114.87	4056.5	4124.8	4175.9	4152.5	4171.8	4247.6	4190.7	4195.5	4261	4252	4187.7	4455.5	3988.3	4177.2	4098	4034.5
Eukaryotic translation initiation factor 4B	Q8BGD9	Eif4b	68.8	27	52.7005	47	611	139.09	6546.7	6626.5	6538.2	6470.1	6935.7	7019.2	6796.5	6981.5	6755.6	6570.6	6823.5	6812.4	6920.9	6734.1	6787.7	6785.9
Eukaryotic translation initiation factor 4E	P63073	Eif4e	25	6	26.7281	10	217	26.78	1358.1	1372.6	1311.2	1302.6	1305.4	1347	1323.8	1352.5	1376.4	1371.9	1400.8	1444.3	1294.7	1292.4	1347.9	1315.7
Eukaryotic translation initiation factor 4E transporter	Q9EST3	Eif4enif1	107.9	2	3.76399	2	983	5.15	34.8	26.9	28.3	32.1	41	31.3	34.7	40.3	36.2	39.2	40.1	29.1	35	30	34.7	28.3
Eukaryotic translation initiation factor 4E type 2	Q8BMB3	Eif4e2	28.2	5	30.6122	5	245	13.26	374.4	375	362.5	358.4	343.5	348.2	361.4	352.6	353.9	372.4	373.2	355	351.6	341.2	354.9	350.3
Eukaryotic translation initiation factor 4E-binding protein 2	P70445	Eif4ebp2	12.9	2	37.5	2	120	8.52	165	154.5	149.5	152.6	142.2	163.2	167.9	136.8	149.3	173.2	172.3	167.4	151.4	154.6	148.1	173.9
Eukaryotic translation initiation factor 4H	Q9WUK2	Eif4h	27.3	15	57.6613	33	248	94.81	6272.1	6009.8	6057.3	6002.3	6321.6	6427.6	6238.7	6414.1	6692.5	6971.1	6518.5	6630.5	6550	6432.5	6477.8	6699.2
Eukaryotic translation initiation factor 5	P59325	Eif5	48.9	22	48.2517	37	429	106.25	5234.5	5323.9	5208.4	5230.3	5434.4	5390.4	5424.2	5454.8	5331.9	5502	5491.1	5491.6	5521	5504.2	5430.8	5571.2
Eukaryotic translation initiation factor 5A-1	P63242	Eif5a	16.8	14	71.4286	40	154	131.38	10967.1	11087.9	11083.5	11149.1	11096.4	11317.4	11053.3	11465	11781.3	11858.2	11788.4	12270.4	11741.4	11485.8	11216.1	12057.3
Eukaryotic translation initiation factor 5A-2	Q8BGY2	Eif5a2	16.8	8	41.1765	25	153	76.62	571.3	592.7	591.7	608.2	565.3	566.8	565.8	586.6	560.7	570.9	561.1	537.7	549.5	612.3	599	633.3
Eukaryotic translation initiation factor 5B	Q05D44	Eif5b	137.5	11	11.0197	12	1216	38.46	1793.7	1815.3	1798.5	1781.4	1831.2	1821	1798.5	1808.8	1865.6	1822.9	1823.7	1909	1746.3	1769.8	1777.1	1769.1
Eukaryotic translation initiation factor 6	O55135	Eif6	26.5	6	42.8571	8	245	36.8	908	924.6	910.7	916.6	968.9	917.2	965	948.8	961.4	986	987.2	997.2	968	936.5	930.2	983.5
Evolutionarily conserved signaling intermediate in Toll pathway, mitochondrial	Q9QZH6	Ecsit	49.8	7	27.1264	10	435	29.54	776.7	777.3	779.7	774.4	776.7	791.8	784.5	796.9	781.9	774	793.4	817.9	748.8	772.1	766.9	761
Excitatory amino acid transporter 1	P56564	Slc1a3	59.6	15	24.3094	70	543	226.57	9209.7	8732	9060.2	9080.4	9299.5	8919.4	9190.5	8896.4	9616.2	10120	9750.1	9522.9	9593.7	9384	9139	8845.6
Excitatory amino acid transporter 2	P43006	Slc1a2	62	24	34.965	159	572	465.35	24872.2	24261.9	25620.9	24282.6	25440.8	26214.9	25402.4	25983.8	24862.9	25549.9	23822.8	24751.2	25283.9	25634.1	25117.8	23837
Excitatory amino acid transporter 3	P51906	Slc1a1	56.7	5	12.0459	6	523	22.75	668.4	624.6	586.5	634.6	663.8	661.1	709.6	637.5	678.7	675.3	715.4	695.2	683.3	669.4	704.2	640
Exocyst complex component 1	Q8R3S6	Exoc1	101.8	18	20.9172	24	894	67.58	2832.7	2896.4	2763.4	2848.1	2722.9	2750.7	2755.7	2770.4	2799.5	2820.9	2688.9	2819.6	2714.5	2728.5	2760.9	2701.6
Exocyst complex component 2	Q9D4H1	Exoc2	103.9	26	33.2251	35	924	97.88	4840.1	5010.1	4872.6	4828.6	4743.3	4703.3	4799.9	4848.4	4856.4	4883.4	4695.9	4937.3	4769.8	4747.6	4716.8	4667.3
Exocyst complex component 3	Q6KAR6	Exoc3	86.4	18	33.6424	26	755	76.22	2864.2	3107.9	2858.4	2915.2	2861.5	2824.2	2942.5	2863.9	2806.8	2867.7	2713.7	2845.5	2652.3	2823.8	2770.9	2782.1
Exocyst complex component 4	O35382	Exoc4	110.5	24	29.0256	37	975	91.49	3999	3969.3	4073.9	3954.3	4205.2	4331.2	4595.6	5451.5	4113	4150.2	3890.1	4121	3927.6	4072.2	4247.4	4040.7
Exocyst complex component 5	Q3TPX4	Exoc5	81.7	18	30.0847	27	708	90.9	3246	3364.9	3327.9	3291.3	3234.4	3189.1	3296.1	3185.2	3345.2	3362.7	3251.3	3438.9	3253.7	3248.4	3232.6	3186.4
Exocyst complex component 6	Q8R313	Exoc6	93	9	14.7132	11	802	18.79	437.9	454.6	446.9	459.3	408.8	440.3	429.6	421.8	449.3	437.6	467.1	457.6	419	439	419.4	439.4
Exocyst complex component 6B	A6H5Z3	Exoc6b	94.1	16	27.037	21	810	51.79	1437.8	1427.5	1480.1	1498.1	1481.4	1597.8	1544.4	1505.3	1508.6	1463.2	1507.6	1550.8	1491.8	1505.6	1450	1423.3
Exocyst complex component 7	O35250	Exoc7	79.9	27	44.3329	30	697	91.37	4991.9	5126.4	5094.9	5048.8	4957.9	4913.8	5020.5	4955.5	5006.5	5075.7	4906.7	5084.2	4909	4937.9	5028.3	4913.2
Exocyst complex component 8	Q6PGF7	Exoc8	81	24	36.8715	37	716	140.87	4644.2	4522.3	4628.4	4602.9	4575.5	4551.1	4564.7	4672.1	4618.4	4649	4490.7	4656.2	4509.6	4547	4520.1	4429.4
Exonuclease 3'-5' domain-containing protein 2	Q8VEG4	Exd2	74.3	3	7.07692	3	650	8.46	69.8	59.6	69.3	65.1	65	63.5	59.1	56.2	65.1	68.3	71.7	73.6	67.4	61	62	70.9
Exopolyphosphatase PRUNE1	Q8BIW1	Prune1	50.2	13	34.8018	21	454	54.41	2467	2437.4	2443	2458.5	2526.5	2537.8	2532.3	2477.4	2485	2545.8	2583.1	2574.1	2512	2490.5	2515.5	2508
Exosome RNA helicase MTR4	Q9CZU3	Mtrex	117.6	4	4.90385	4	1040	10.59	140.1	148.7	148.6	139.1	142.1	136.4	143	136.1	138.5	138.5	138.4	147	125.7	124.4	150.1	147.8
Exportin-1	Q6P5F9	Xpo1	123	24	27.5444	44	1071	129.96	5279.2	5442.3	5210.4	5436.2	5139.5	5027.7	5151.6	5167.6	5537.2	5639.1	5571.7	5487.5	5180.6	5320.8	5224.7	5167.1
Exportin-2	Q9ERK4	Cse1l	110.4	34	38.414	47	971	139.59	6082.4	6444.8	6225.2	6385	6137.3	6165	6153.3	6184.5	6411.8	6450.2	6498.9	6389.3	6237.4	6222.8	6199.7	6315.5
Exportin-5	Q924C1	Xpo5	136.9	5	6.39535	5	1204	18.97	250.4	246.7	227.8	230.2	267.3	234.9	230.6	239.3	244.5	242	258.7	244.7	244	213.1	234.2	231.8
Exportin-7	Q9EPK7	Xpo7	123.7	17	18.8592	21	1087	58.59	1787.3	1793.3	1771.1	1844.1	1779.5	1797.2	1765.8	1750.9	1768.2	1743	1809.4	1773	1803.8	1808.9	1770.6	1748.6
Exportin-T	Q9CRT8	Xpot	109.7	5	7.99585	6	963	13.89	547.4	540	528.6	563.1	535	538.5	549.9	532.1	569.1	569.8	591.7	559.5	573.7	513.7	515.1	537.2
Extended synaptotagmin-1	Q3U7R1	Esyt1	121.5	10	12.3626	12	1092	35.59	706.8	728.9	718.8	729.6	738.1	693.2	686.8	693.8	641.9	733.1	745	707.2	713.4	697.1	758.7	728.9
Extended synaptotagmin-2	Q3TZZ7	Esyt2	94.1	10	16.0947	14	845	36.79	705.7	749.6	764.8	791.6	774.9	825.4	747.6	770	789.6	786.7	758.9	787.6	760.8	777.6	766.8	769.4
Ezrin	P26040	Ezr	69.4	47	63.3106	85	586	231.96	12995.5	14394.2	13579.3	14358.5	13701.9	13382.8	13430	13545.5	15295.5	13271	12464.5	14212.5	13031.9	13803.5	14300.6	14803
FACT complex subunit SPT16	Q920B9	Supt16h	119.7	9	10.7927	10	1047	24.55	1180.6	1246.1	1201.3	1179.1	1165.2	1168.2	1148.9	1161.8	1189.2	1212.7	1237.5	1225.9	1138.5	1164	1173	1205.9
FACT complex subunit SSRP1	Q08943	Ssrp1	80.8	7	11.1582	11	708	22.91	940.3	955.9	904.2	964	912.4	879.3	907.2	907	960.7	936.2	994.7	971.8	922.1	912.6	908.6	929.7
F-actin-capping protein subunit alpha-1	P47753	Capza1	32.9	15	71.6783	25	286	95.98	2400.1	2346.9	2384.2	2405	2441.8	2392	2426	2450.2	2511.3	2547.8	2609.2	2575.7	2443.1	2432.4	2455.8	2479
F-actin-capping protein subunit alpha-2	P47754	Capza2	32.9	19	79.7203	48	286	191.16	5524	5671.5	5576.5	5359.3	5434.6	5382.7	5623.5	5495.8	5488.9	5446.6	5158.6	5446.2	5501.4	5697.1	5545	5428.8
F-actin-capping protein subunit beta	P47757	Capzb	31.3	26	74.7292	63	277	164.62	10305.3	10382	10385.8	10215.3	10323.9	10299.3	10603.6	10467.5	10540.3	10174.8	9746	10385.6	10412.4	10446.7	10294.1	10280.3
F-actin-uncapping protein LRRC16A	Q6EDY6	Carmil1	151.8	4	3.56623	4	1374	8.09	231.8	227.8	240.1	232	219.5	241.1	222.7	222	246.2	225.8	261	241.4	233.6	217.5	206	226
Factor VIII intron 22 protein	Q00558	F8a1	40.5	4	14.4737	5	380	20.32	532.6	541.2	541.7	515.3	534.6	516.5	513	533	524.9	544.4	488.3	545.8	509.8	510.5	515.7	510
FAD synthase	Q8R123	Flad1	54.7	9	25.4065	11	492	32.51	1146	1126	1153.2	1160.4	1108	1122.2	1147.5	1128.6	1131.1	1090.6	1140.4	1116.6	1121.4	1104.7	1122.1	1129.5
FAD-linked sulfhydryl oxidase ALR	P56213	Gfer	22.9	2	10.6061	2	198	4.23
Far upstream element-binding protein 1	Q91WJ8	Fubp1	68.5	22	35.7911	32	651	84.66	3066.2	3110.5	3040.2	3199.5	3198.2	3172.5	3054.3	3037.2	3279.2	3304.1	3538.1	3357.1	3120.2	3020.7	3063.4	3114.4
Far upstream element-binding protein 2	Q3U0V1	Khsrp	76.7	34	47.3262	59	748	211.19	7913.9	8223	8192.1	8208.3	8529.9	8741.2	8475.9	8517.9	8529.6	8474.5	8389.2	8858.9	8476.8	8334.2	8583.8	8612.7
Farnesyl pyrophosphate synthase	Q920E5	Fdps	40.6	14	43.0595	33	353	101.18	3153.4	3224.7	3224.8	3293.6	3153.7	2928.1	3060.8	3085.5	3361.8	3467	3330.4	3482.5	3115.4	3134.1	3215.7	3281
Fas apoptotic inhibitory molecule 1	Q9WUD8	Faim	20.2	6	35.7542	8	179	16.12	652.3	660.3	685.6	648.1	665.2	654	650.4	637.4	662.9	651.4	700.3	658.3	634	614.6	638.9	679.8
FAS-associated factor 1	P54731	Faf1	73.8	3	6.47149	4	649	13.1	258.2	265.9	259.8	266.2	244.8	259.4	242.1	261.5	247.9	257.9	254.3	250.6	278.9	249.1	261.4	262.2
FAS-associated factor 2	Q3TDN2	Faf2	52.4	15	43.5955	22	445	80.24	2528.1	2534.7	2548	2655.7	2583.4	2594.1	2550.5	2493	2632.9	2548.2	2744.6	2666.3	2584.8	2508.3	2507.6	2356.5
Fasciculation and elongation protein zeta-1	Q8K0X8	Fez1	45.2	2	5.10204	2	392	1.63	179	179.7	186.3	185.6	166.6	186.6	161.5	177.4	169.9	194.5	180.7	176.1	149.2	169.4	185.2	177.8
Fascin	Q61553	Fscn1	54.5	32	75.4564	79	493	301.79	12827.3	12541.2	12711.5	13126.6	13307.3	13140.6	13125.7	13332	14600.9	15638.5	16155.5	15915.4	13418.3	13087	13304.7	13534.4
FAST kinase domain-containing protein 4	Q91YM4	Tbrg4	71.5	2	6.03175	2	630	6.62	109.9	115.9	118.7	109.3	112	107	115.1	114.3	114.4	124.8	117.8	121.4	122.8	108.2	111.2	115
Fatty acid synthase	P19096	Fasn	272.3	110	55.9105	212	2504	698.42	25819.3	26160.5	25699.9	26332.1	25414.8	25677.2	25963.8	25886.3	27381.8	27036.5	26125.7	28433.3	25523.5	26104.1	26082	25709.4
Fatty acid-binding protein 5	Q05816	Fabp5	15.1	15	86.6667	42	135	144.59	7304.7	6699.1	7254.8	7338.4	7813.2	7745.9	7888.4	7901.6	8905.2	8938.6	9440.8	9481.4	8547.8	7951.4	7864.9	7971.8
Fatty acid-binding protein, brain	P51880	Fabp7	14.9	9	75	23	132	71.56	3291.7	3279.6	3287.7	3378.9	3870.9	3746.9	3727.7	3768.1	5534.4	5857.3	6443.2	6951.8	4216.3	3832.4	3872.7	4122
Fatty acid-binding protein, heart	P11404	Fabp3	14.8	8	48.1203	23	133	59.14	4383.2	4563.2	4378.2	4399.5	4350.2	4463	4301.6	4530.2	4014.8	4432.2	4983.8	4313.3	4493.2	4393.7	4383.9	4834.2
Fatty-acid amide hydrolase 1	O08914	Faah	63.2	19	47.6684	34	579	111.56	3742.3	4008.6	3795.5	3740.7	3650.1	3567.9	3781.9	3702.4	4006.1	3989.1	3558.9	3964.1	3664.9	3831.6	3762.6	3616.8
F-BAR and double SH3 domains protein 2	Q3USJ8	Fchsd2	84.2	2	5.81081	2	740	2.92	35.4	30.6	35.2	34.7	32.2	30.3	29.9	28.1	37.6	29.4	35.3	32.1	29.7	31.6	31.9	30.3
F-BAR domain only protein 2	Q3UQN2	Fcho2	88.7	5	10.8776	7	809	15.61	384.5	385.7	383	383.9	390.6	374.9	370.7	379.7	404.8	394.9	407.8	405.2	416.8	372.3	380.3	387.7
F-box only protein 2	Q80UW2	Fbxo2	33.7	16	77.1044	28	297	112.93	3641	3596.6	3699	3606.2	3559.1	3514.2	3490.2	3540	3278.4	3482.2	3468.5	3132	3547.6	3589.6	3645.8	3672.7
F-box only protein 21	Q8VDH1	Fbxo21	72.1	3	10.3668	3	627	10.29	97.1	107.5	104	103.8	109.3	119.2	110.3	99.9	119.9	101.9	107.6	116.3	94.2	102.6	104.2	104.3
F-box only protein 22	Q78JE5	Fbxo22	44.2	6	16.9154	8	402	26.65	629.7	610.9	621	608.9	631.7	598.1	578.5	581.2	570.2	579.1	597.6	600.8	543.6	557	554.6	562.7
F-box only protein 3	Q9DC63	Fbxo3	55.2	4	13.125	6	480	10.62	173.9	167.2	173.1	164.3	174.8	178.5	191.3	165.2	180	167.2	186.1	180.8	156.9	162.9	173.3	161.2
F-box only protein 41	Q6NS60	Fbxo41	94.3	25	36.9989	35	873	118.61	3225.8	3283.7	3278.4	3212.5	3277	3237.9	3208.7	3264.2	3407.8	3529.3	3415.7	3449	3203.4	3258.6	3249.9	3156.5
F-box/LRR-repeat protein 15	Q91W61	Fbxl15	33.1	3	19.3333	5	300	21.72	51.7	51.4	55.4	53.2	53.5	44.4	55.9	49.5	49.9	58.5	54.2	53.3	48.5	47.1	54.8	48.9
F-box/LRR-repeat protein 16	A2RT62	Fbxl16	51.8	15	47.1816	21	479	91.84	2254.5	2288	2199.3	2217.9	2199.9	2171.9	2183.8	2157.5	2220.2	2236.7	2156.9	2252.9	2117.6	2193	2168.6	2093.7
F-box/LRR-repeat protein 20	Q9CZV8	Fbxl20	48.4	2	5.04587	2	436	5.66	267.4	260.6	303.4	263.2	256.9	245.4	246.3	251	258.8	244.1	260.2	261.1	260.5	268.6	241.7	256
F-box-like/WD repeat-containing protein TBL1X	Q9QXE7	Tbl1x	56.8	3	5.50285	3	527	7.05	309	309.5	306.2	302.3	316.3	292.8	297.4	305.2	291.1	312	358.2	325.3	340.9	303.8	326.5	322.2
F-box-like/WD repeat-containing protein TBL1XR1	Q8BHJ5	Tbl1xr1	55.6	2	4.66926	2	514	6.19	90.3	100.2	96.1	83.6	87.5	89.4	88.2	88.3	87.2	93.5	95.6	88	88.9	81.3	73.8	85.9
FERM and PDZ domain-containing protein 4	A2AFR3	Frmpd4	144.9	15	16.8939	19	1320	63.79	879.4	906.6	950.8	930.6	878.8	886.7	854.1	900	894.3	870.1	837.3	923.1	844.6	854.3	832.7	833.9
FERM domain-containing protein 4A	Q8BIE6	Frmd4a	113.8	4	5.39216	5	1020	17.28	430.8	445.4	449.3	458.6	414.6	442.5	426.4	430.6	452.5	467.1	494.9	478.1	413.2	401.7	428.5	455.7
FERM domain-containing protein 4B	Q920B0	Frmd4b	117.9	2	3.76812	2	1035	4.11
FERM, ARHGEF and pleckstrin domain-containing protein 1	F8VPU2	Farp1	118.8	31	39.9809	39	1048	119.99	4610.2	4766.1	4750.4	4827.3	4604	4680.1	4634.8	4585.3	4659.9	4901.2	5080	4891.4	4477.7	4542.7	4588.8	4527.1
Fermitin family homolog 2	Q8CIB5	Fermt2	77.8	17	37.9412	31	680	100.45	2029.3	2094.9	2106.9	2097.6	2087.6	2033.5	2089.7	2008.7	2217.6	2161.1	2235.6	2251.4	2115.8	2085.9	2150.7	2091.5
Ferredoxin-2, mitochondrial	Q9CPW2	Fdx2	18.8	4	30.4598	9	174	28.49	617.2	618.8	642	620.7	633.4	635.5	614.4	613.4	581.5	555.9	580.2	553.4	610.1	603.4	593.9	604.6
Ferritin heavy chain	P09528	Fth1	21.1	7	56.044	8	182	35.92	1016.9	1058.5	1059.6	1051.8	944.5	902.2	1001.4	1006.9	1102.8	1019.7	1056.1	1019	1045.8	1051.4	962.4	1037.4
Ferrochelatase, mitochondrial	P22315	Fech	47.1	18	53.3333	27	420	97.01	2880.3	2778	2831.2	2806.8	2862	2827.9	2828.3	2812.8	2841.3	2856.4	2925	2833	2856.2	2885.5	2856.9	2811.4
Fibrinogen alpha chain	E9PV24	Fga	87.4	15	21.7997	20	789	46.9	3397	4137.3	3592	3634.5	3525.1	3489	3205.8	3329.3	4339	4344	6019.8	4833.8	3543.2	3384.5	3523.4	3630.5
Fibrinogen beta chain	Q8K0E8	Fgb	54.7	15	37.8378	19	481	59.33	2348.2	2847.1	2508.4	2485.7	2401.1	2269.6	2222.5	2321.6	3005.1	3005.7	4213.2	3291.5	2386.4	2183.8	2337.6	2432
Fibrinogen C domain-containing protein 1	A2AV25	Fibcd1	50.6	6	16.5577	7	459	21.88	626.8	619.7	642.2	655.2	658.5	657.5	648.4	657.5	675.7	722.2	680.3	680.1	647.6	645.7	607.1	637.6
Fibrinogen gamma chain	Q8VCM7	Fgg	49.4	10	33.4862	12	436	32.4	1264.8	1446.1	1329.8	1309.5	1283.3	1270.6	1217	1275.9	1511.1	1503.7	2026.9	1595.6	1244.3	1147.6	1176.2	1235.1
Fibroblast growth factor 12	P61329	Fgf12	27.4	5	25.1029	8	243	21.26	803.5	773.6	796.4	755	693.3	710.9	732.8	728.8	755.2	741	803.9	692.7	739.4	760	716.2	758
Fibroblast growth factor receptor 3	Q61851	Fgfr3	87.7	4	4.61923	5	801	9.7	306.3	300.9	315	300.3	316.2	308.2	306.3	319.1	291	321	297	331.1	281.5	305.9	308.6	323.7
Fibronectin	P11276	Fn1	272.4	4	2.18006	5	2477	15.55	299.4	411.6	299	295.8	294.4	252.8	217.4	249	263.7	288.1	399.9	284.4	257.7	233.3	292.7	275.4
Fibronectin type III and SPRY domain-containing protein 1	Q7TPM6	Fsd1	55.5	18	48.9919	24	496	96.48	2727.7	2767.8	2728.5	2712.1	2656.2	2707.4	2712.6	2768.4	2760.9	2815.8	2874.1	2865.6	2791.1	2702.5	2720.8	2660.5
Fibulin-5	Q9WVH9	Fbln5	50.2	6	14.9554	10	448	24.19	376.6	499.7	409.1	355.9	428.8	313.9	268.1	302.3	319.4	418	714.2	500.3	371.8	253.5	437.8	406.4
Filamin-A	Q8BTM8	Flna	281	44	22.8561	52	2647	159.06	6018.7	7676.4	6272.3	5927.4	6397.2	5014.2	4714.7	5206.9	5148.3	5892.3	7922.7	6336.8	5815.3	4675.2	6562.6	6406.8
Filamin-B	Q80X90	Flnb	277.7	9	4.30438	11	2602	20.47	56.9	59.5	50.6	61.2	60.4	52	57.7	49.4	52.8	59.5	73	50.3	62.5	64.5	59	57.6
Filamin-C	Q8VHX6	Flnc	290.9	5	1.68745	6	2726	12.7	235.9	220.3	224.6	227.8	201.3	206.3	206.8	218.4	251.2	242.2	244.1	241.9	204.9	205.3	198.1	200.5
FK506-binding protein 15	Q6P9Q6	Fkbp15	132.9	15	16.5296	19	1216	51.26	1522.7	1616.2	1571.4	1520.4	1513.7	1528.9	1520.4	1490.8	1575.4	1546.5	1518.7	1594.7	1443.6	1493.6	1556.6	1570.8
Flavin reductase (NADPH)	Q923D2	Blvrb	22.2	10	70.8738	11	206	42.52	1583.2	1676.3	1531.7	1549	1482.8	1406.8	1428.6	1437.7	1491.2	1557.4	1662.8	1483.9	1491.1	1471.1	1556.9	1566.4
Flotillin-1	O08917	Flot1	47.5	26	70.7944	48	428	171.17	6337.8	6109.5	6114.1	6117.1	6091.8	6005	5980.3	5920.9	6029.9	6080.3	6163.2	6066.4	5891.3	5803.7	5981.9	5851
Flotillin-2	Q60634	Flot2	47	27	60.7477	46	428	145.79	5479.4	5430.9	5283.9	5428.7	5295.3	5263.8	5256.4	5178.8	5261.4	5361	5348.1	5319.8	5132	5171.7	5228.8	5090.4
Focadhesin	A2AKG8	Focad	198.8	2	1.89099	2	1798	5.75	23.5	27.7	23.5	19.8	20.8	26.6	22.8	20.2	25.9	29.9	29.1	22.3	28.8	23.7	27.2	27.9
Focal adhesion kinase 1	P34152	Ptk2	119.2	20	26.2357	26	1052	76.1	1965.7	1985.2	1985.9	1968.3	1983.9	1950	1949.9	1973.7	1968.2	2047.3	2005.3	2007.4	1924	1978.4	1943.3	1930.7
Folate receptor alpha	P35846	Folr1	29.4	6	34.902	8	255	23.36	1186.9	1400.8	1316	1411.3	1108.4	1076.7	1043.7	1039.2	1607.5	874.7	783.5	1189.2	956.5	1087	1436.2	1370.9
Forkhead box protein K1	P42128	Foxk1	74.9	2	3.47705	4	719	14.28	203.6	214.9	212	215.4	210.3	229.3	224.8	217.8	207.1	211	193.5	217	213.3	215	210.3	212.3
Formin-1	Q05860	Fmn1	163.5	2	2.6603	2	1466	5.54	43.3	36.1	29.7	43.2	36.7	45.8	38.3	37	38.6	43.2	41.3	37.2	36.8	35.6	38	39.9
Formin-2	Q9JL04	Fmn2	167.3	17	16.6667	23	1578	57.15	1740.1	1743.5	1788.8	1790.4	1792.4	1901.6	1789.9	1810.3	1673.2	1681.1	1679.5	1662.9	1722.9	1781.8	1793.6	1685.5
Formin-binding protein 1	Q80TY0	Fnbp1	71.3	14	22.4026	14	616	33.63	1982.9	1930.9	2046.3	2051.6	2044.1	2090.6	2102.4	2099.2	2094.4	2078	2043	2113.1	2113.2	2054.8	2056.6	2147.2
Formin-binding protein 1-like	Q8K012	Fnbp1l	69.8	3	5.78512	3	605	10.27	258.6	307.3	227.6	229.7	227.8	230.3	230.5	227.4	210.2	226.7	283.5	228.5	211.5	209.6	246.1	236.3
Formin-like protein 1	Q9JL26	Fmnl1	122	19	19.3784	22	1094	52.48	2618.2	2615.4	2646.6	2573.8	2597.7	2573.1	2690.5	2655.6	2670	2629.7	2486.6	2691.4	2599.7	2626.1	2563	2482.3
Formin-like protein 2	A2APV2	Fmnl2	123	17	16.1142	19	1086	51.73	1299.5	1313.4	1307.2	1274.6	1281.1	1208	1216	1238.8	1234.2	1269.5	1241.7	1288	1215.5	1239.5	1269.2	1241.4
Four and a half LIM domains protein 1	P97447	Fhl1	31.9	20	71.7857	32	280	85.85	4369.6	4501.9	4397.7	4593.6	4337	4290.8	4404.8	4327.5	4337.8	4403.6	4451.2	4334.6	4356.7	4364.5	4521	4542.1
Four and a half LIM domains protein 2	O70433	Fhl2	32.1	10	38.3513	11	279	31.26	1678.1	1686.8	1655.9	1589.7	1633.1	1624.9	1699.8	1644	1708.8	1754.6	1654.8	1798.3	1651.2	1648.1	1643.1	1633.3
Fractalkine	O35188	Cx3cl1	42.1	2	6.58228	3	395	9.68	184.4	190.3	181.2	185.5	188.7	188.7	197.5	194.2	195.8	197.8	201.7	217.4	185.4	188.4	188.1	187
Fragile X mental retardation syndrome-related protein 1	Q61584	Fxr1	76.2	14	20.9749	20	677	55.69	3412.5	3449.8	3350.6	3380	3135.6	3169.7	3120.3	3072.6	3501.8	3576.1	3516.7	3600.3	3064.2	3126.2	3181.3	3245.9
Fragile X mental retardation syndrome-related protein 2	Q9WVR4	Fxr2	73.7	12	20.0594	14	673	40.82	1064.7	1068.3	1063.5	1057.3	1037.5	999.3	1025.5	1018.2	1123	1089.4	1145.3	1091.9	1006.8	1014.1	1000.5	983.2
Fructosamine-3-kinase	Q9ER35	Fn3k	35	8	35.9223	11	309	38.65	1700.5	1731.5	1660.6	1721.4	1623.2	1562	1595.5	1564.1	1484.5	1550.6	1539.7	1420.8	1641.2	1592.2	1669.2	1647.4
Fructose-2,6-bisphosphatase TIGAR	Q8BZA9	Tigar	29.2	5	26.0223	9	269	20.92	779.8	740.2	747.8	772.9	754	731.3	791	774.4	782.1	801.2	781.5	773	762.5	788.3	773.9	774.2
Fructose-bisphosphate aldolase A	P05064	Aldoa	39.3	46	94.2308	479	364	1459.27	49828.2	48301.8	49702.5	48298.3	48907.1	49718.4	48999.4	49190	49555	47831.9	47789.8	47658.1	49055.1	48765.7	48143.8	48323.9
Fructose-bisphosphate aldolase B	Q91Y97	Aldob	39.5	2	3.57143	8	364	21.28	578.9	442.8	499.8	510.5	578.6	517	555.2	506	495.6	469.1	481.8	438.8	544.3	526.3	575.6	531.2
Fructose-bisphosphate aldolase C	P05063	Aldoc	39.4	34	87.6033	281	363	821.42	18255.1	17961.6	17900.7	18035.6	18419.9	18296.6	18307.6	18161.7	18270	18752.7	19414.7	18461.6	18587.1	18140.7	18284.2	18611.5
FSD1-like protein	Q8BYN5	Fsd1l	56.8	11	28.9941	16	507	58.48	1479	1467.8	1385.5	1483.1	1427.1	1424.1	1488.7	1387.2	1473.8	1486.4	1503.4	1470.1	1398.8	1433.7	1440.7	1415.5
FTS and Hook-interacting protein	Q3U2I3	Fam160a2	106.5	4	6.15385	6	975	19.19	237.1	237.5	230	236.2	234	232.7	226	211.4	249.5	244.2	281.6	240.6	231	223.4	233.6	233.5
Fumarate hydratase, mitochondrial	P97807	Fh	54.3	33	67.6529	134	507	434.88	21611	20765.4	20935.7	21049.9	21353.8	20783.9	20909.1	20756.3	20210.2	20411.4	20323.3	19269.7	20649.6	20714.8	21115.5	20773.6
Fumarylacetoacetase	P35505	Fah	46.1	11	42.2434	25	419	69.2	2146.6	2129	2204.8	2273	2033.3	2023.5	2026.1	2006.1	1941.3	1897.7	1946.5	1805.2	2015.1	1980.9	2078.3	2123.4
Fumarylacetoacetate hydrolase domain-containing protein 2A	Q3TC72	Fahd2	34.7	14	59.4249	27	313	102.91	4603.2	4590.5	4671.7	4735.4	4501	4444	4326.8	4465	3976.3	4030	4088.2	3889.3	4107.1	4164.2	4249.2	4211.7
FUN14 domain-containing protein 2	Q9D6K8	Fundc2	16.6	5	27.8146	7	151	24.49	1507.5	1654.1	1529.4	1561.5	1549.5	1433.9	1448.2	1520.2	1512.5	1551.9	1529	1538.3	1404.9	1456.1	1488.5	1527
FXYD domain-containing ion transport regulator 6	Q9D164	Fxyd6	10.4	2	26.5957	3	94	11.69	132.3	140.9	126.9	128.6	141.5	122.6	116.7	125.7	129.6	142.6	145.9	150.4	132.2	128.5	132	127.9
FXYD domain-containing ion transport regulator 7	P59648	Fxyd7	8.5	3	28.75	5	80	14.06	1565	1506.6	1455.7	1537.4	1621.9	1637.4	1657.9	1653.6	1492.7	1616.7	1559.2	1655.9	1646.5	1676.4	1693.1	1612.7
FYVE, RhoGEF and PH domain-containing protein 4	Q91ZT5	Fgd4	86.5	5	9.79112	6	766	14.4	577.8	553.3	559.4	557.7	582.9	590.7	583.1	563.9	574	573.9	611.9	606.2	556.5	540.7	523.9	517.1
G protein-activated inward rectifier potassium channel 1	P63250	Kcnj3	56.5	4	9.78044	4	501	14.22	195.4	198	207	210.7	202.5	204.4	198.6	194.1	196	199	189.1	201.7	188.6	200.2	176.2	199.3
G protein-activated inward rectifier potassium channel 2	P48542	Kcnj6	48.6	2	8.70588	3	425	11.75	79.3	80.4	82.1	75.4	81.2	82.6	83	74.3	93.6	78.2	67.3	85.3	75.7	93.8	80.9	72.6
G protein-activated inward rectifier potassium channel 3	P48543	Kcnj9	43.9	3	11.7048	3	393	9.27	166	178	190.3	187.3	177.6	162.9	161	183.8	173.9	180.7	194.6	164.1	162.2	169.5	187.4	170.5
G protein-coupled receptor kinase 6	O70293	Grk6	65.9	7	16.6667	7	576	19.67	457.7	483.5	498.9	479.9	493.6	479.5	517.4	497.5	499	479.6	502.6	526.4	495.8	481.9	486	449.3
G protein-regulated inducer of neurite outgrowth 1	Q3UNH4	Gprin1	95.4	71	76.073	142	932	399.98	24462	23399.6	23825.1	23649.6	25914	26146.7	24780.5	24864.2	25722.6	26618.7	27073.1	26881.1	25328.3	24441.3	24969.8	24258.2
G protein-regulated inducer of neurite outgrowth 3	Q8BWS5	Gprin3	80.4	10	17.038	14	763	23.57	1137.2	1149.3	1126.3	1194.3	1213.4	1234.8	1238.1	1229.8	1259.5	1232.4	1234.2	1324.8	1135	1194.3	1169.6	1150.2
Galactocerebrosidase	P54818	Galc	77.2	2	6.14035	3	684	6.07	21.9	24.4	22.9	26.9	24.1	26.5	26.7	25.2	19.6	26.7	25.3	23.7	33.1	23.3	25.6	22.7
Galactokinase	Q9R0N0	Galk1	42.3	12	45.1531	17	392	49.48	1139.2	1131.9	1116.4	1153.6	1169	1065	1151.8	1102.6	1139.8	1148.9	1240.7	1145.5	1104.8	1095	1065.8	1162.3
Galectin-1	P16045	Lgals1	14.9	6	52.5926	11	135	38.69	1478.5	1712.6	1534.7	1513.5	1474.4	1356.8	1254.8	1271.9	1344.8	1340	1882.4	1302	1453	1333.9	1552.2	1607.7
Galectin-related protein	Q8VED9	Lgalsl	18.9	10	62.7907	21	172	68.12	3294.9	3248	3195.8	3182.3	3149.8	3065.5	3195	3110.6	2906.7	2951.3	3005.8	2884.1	3290	3227.1	3233.3	3392.5
Gamma-adducin	Q9QYB5	Add3	78.7	25	34.8442	47	706	143.96	7142.8	7414.2	7115.1	7152.2	7079.5	7109.6	7118.4	6936.4	7092.3	7067.4	7273.6	6991.6	7020.9	7077.5	7204.8	7103.3
Gamma-aminobutyric acid receptor subunit alpha-1	P62812	Gabra1	51.7	18	30.3297	28	455	68.64	5648.4	5476.8	5543.8	5358.5	5803.6	5630.3	5581	5650.8	5394.5	5815	5360.4	5585	5397.6	5595.8	5760.8	5578.9
Gamma-aminobutyric acid receptor subunit alpha-2	P26048	Gabra2	51.1	10	19.2905	16	451	45.09	1013.9	1005.7	1005.5	979.8	993.3	1031.5	1009.1	957.9	1022	1017.7	947.9	1014.4	958.1	964.6	991.2	968.1
Gamma-aminobutyric acid receptor subunit alpha-3	P26049	Gabra3	55.4	5	8.33333	6	492	16.99	174.6	166.1	177.4	163.1	185	135.3	166.3	148.9	161.8	181.1	173.7	171.5	146.5	172.9	171.5	178.5
Gamma-aminobutyric acid receptor subunit alpha-4	Q9D6F4	Gabra4	60.8	2	3.80435	3	552	6.33	232.1	235.6	219.2	213.6	221.4	217.9	229.6	219.5	225.1	223	214	223.5	217.4	212.3	204.5	208.2
Gamma-aminobutyric acid receptor subunit alpha-5	Q8BHJ7	Gabra5	52.2	10	20.5184	14	463	37.39	1137.4	1101.7	1136.2	1091.4	1104.8	1106.1	1117.1	1115.4	1208.4	1139	1069.6	1191.9	1084.4	1056.5	1076	1055.4
Gamma-aminobutyric acid receptor subunit beta-1	P50571	Gabrb1	54.1	14	31.0127	22	474	61.13	2993	2973.8	2926.7	2961.3	2955.5	2892	2889	2926	2931	3006.3	2949.6	2861.5	2884.7	2865.6	2878.4	2862.2
Gamma-aminobutyric acid receptor subunit beta-2	P63137	Gabrb2	59.2	12	21.875	19	512	62.25	943.5	930.3	970.9	943.2	974.8	949.9	1014.9	944.4	949.8	975.6	972.2	975.8	956.2	912.1	983.1	917.3
Gamma-aminobutyric acid receptor subunit beta-3	P63080	Gabrb3	54.1	10	19.6617	15	473	50.09	700.7	750.2	715.6	696.9	735.7	755.6	768	730.8	752.3	766.6	762.3	776.2	731.8	719.8	760.9	711.7
Gamma-aminobutyric acid receptor subunit gamma-1	Q9R0Y8	Gabrg1	53.4	2	6.23656	3	465	7.01	41.5	34.5	29.9	36.2	32.2	29.9	27.2	27.8	29.2	34.4	39.4	30.1	35.1	25.6	35	29.4
Gamma-aminobutyric acid receptor subunit gamma-2	P22723	Gabrg2	55.1	9	17.7215	13	474	37.23	1060.2	1053.8	1018	1017.2	994.8	1031.5	1009.1	1029.5	1011.6	1049.4	968.7	1003	1004.9	1005.8	990.8	958.4
Gamma-aminobutyric acid receptor-associated protein	Q9DCD6	Gabarap	13.9	5	24.7863	7	117	20.21	766.8	754	749.9	756.5	800.1	812.8	794.7	787.3	772	790.8	729	805.1	777.8	780.1	767.8	806.7
Gamma-aminobutyric acid receptor-associated protein-like 1	Q8R3R8	Gabarapl1	14	5	20.5128	6	117	17.61	484.2	526.1	494.8	494.9	530.7	534.2	536.7	528.7	476.8	473.3	461.3	480.9	513.1	494.7	513.2	482.3
Gamma-aminobutyric acid receptor-associated protein-like 2	P60521	Gabarapl2	13.7	9	52.1368	12	117	36.63	1981.6	1999.7	1949.4	2061.7	2111.9	2026.3	2066.5	2070	1940.3	2015	2062.3	2000	2042.6	2057.7	2016.3	2136
Gamma-aminobutyric acid type B receptor subunit 1	Q9WV18	Gabbr1	108.1	24	26.875	34	960	99.11	3855.4	3701.2	3715.9	3627	3743.3	3731.4	3741.7	3627.2	3685.8	3816.9	3764.3	3655.7	3589.9	3647.5	3701.4	3576.5
Gamma-aminobutyric acid type B receptor subunit 2	Q80T41	Gabbr2	105.6	22	29.3617	32	940	109.95	3655.1	3489.7	3585.8	3513.8	3523.8	3478.3	3511.9	3494.6	3446.5	3561.8	3583.9	3581.9	3438.5	3475	3530.8	3394.5
Gamma-enolase	P17183	Eno2	47.3	40	89.6313	474	434	1426.12	32265.3	31409.6	32656.9	32512	32412.8	33238.1	32880.2	32825	30761.6	29585.2	31106.7	28837.7	34219.6	32202.5	32021.1	33593.8
Gamma-glutamylaminecyclotransferase	Q923B0	Ggact	17.1	3	38.255	4	149	14.43	138.5	134.6	147.1	154	137	126.2	155.8	128.4	150.2	140.9	160	133.6	152.2	154.1	144.7	165.7
Gamma-glutamylcyclotransferase	Q9D7X8	Ggct	21.2	6	32.9787	9	188	26.05	1524.4	1472.1	1486.5	1478.3	1437.9	1445.6	1491.7	1394.7	1488.5	1432.4	1357.5	1454.9	1428.6	1471.2	1477	1440.2
Gamma-soluble NSF attachment protein	Q9CWZ7	Napg	34.7	28	73.3974	79	312	270.92	15620.3	15121.5	15202.3	15224.4	15886.6	16009.3	16095	15932.5	15263.2	15098.1	15119.2	15049.4	16229.2	16039.1	15624.3	15698.4
Gamma-synuclein	Q9Z0F7	Sncg	13.2	7	66.6667	23	123	89.76	1413.8	1272.3	1290.1	1493.2	1335.2	1573.4	1240.9	1343.8	1153.6	1168.6	1292.5	1141.4	1349.4	1202.7	1696.2	1354
Gamma-tubulin complex component 2	Q921G8	Tubgcp2	103.2	3	3.8674	3	905	6.43	207.9	213.9	209.3	218.7	224	218.5	211.5	208	213.4	224.3	210.1	227.5	214.5	224.8	216.4	222.5
Gamma-tubulin complex component 3	P58854	Tubgcp3	103.4	8	11.8232	10	905	27.01	789.4	805.3	792.9	825.2	804.4	734.9	748.2	768.2	763.2	785.8	749.4	761.3	743.5	739.4	751	776.3
Ganglioside GM2 activator	Q60648	Gm2a	20.8	3	20.7254	5	193	13.44	198.8	201.9	204.3	190.4	177.7	179.5	164.5	184.7	224.9	194.1	242.5	220.5	207.2	189.1	181.5	180.5
Ganglioside-induced differentiation-associated protein 1	O88741	Gdap1	41.3	12	43.2961	22	358	85.47	3455.2	3349.7	3389.3	3372.2	3454.9	3488.6	3509.1	3460.7	3588.6	3673.1	3515.7	3566.3	3434.3	3401.3	3432.2	3256.9
Ganglioside-induced differentiation-associated protein 1-like 1	Q8VE33	Gdap1l1	42.3	14	46.2162	28	370	86.4	2792.8	2678.4	2758.8	2804.6	2787.3	2783.6	2799.1	2676.3	2882.9	2894.7	3012.2	2764.9	2873.9	2748.3	2699.7	2699.3
Gap junction alpha-1 protein	P23242	Gja1	43	13	46.5969	32	382	127.71	5784.3	5758.7	5639.2	5566	5381.8	5340.4	5249.2	5430.1	4686.2	4939.9	4637.5	4563.3	5238.7	5493.9	5464.4	5153.4
Gap junction beta-6 protein	P70689	Gjb6	30.3	2	12.2605	2	261	6.21	205	204.9	174.3	192.9	195.3	162.5	183.8	187.6	132.9	166.8	170	144.1	173.5	184.7	211.2	210.2
Gap junction gamma-3 protein	Q921C1	Gjc3	30.3	2	7.43494	3	269	8.58	430.6	441.1	474.4	475.3	394.2	426.8	453	420	392	378.9	320.7	377.3	405.3	450	461.1	465.9
Gasdermin-E	Q9Z2D3	Gsdme	56.6	7	21.2891	7	512	27.03	583.1	554.1	602.6	578.2	579.6	598.7	583.7	578.7	570.9	582.9	565.5	552.6	537.6	576.9	593.3	579.2
GATOR complex protein DEPDC5	P61460	Depdc5	180.3	2	2.26273	2	1591	2.6	111.2	99.1	113	112.8	99.1	107.5	98.2	97.7	123.9	91.6	120.9	106.8	106.9	94.2	101.7	93.7
GATOR complex protein MIOS	Q8VE19	Mios	98.3	3	5.71429	3	875	11.1	339.9	358.7	368	336.9	362.8	330.6	341.8	354	384.7	374.5	367.7	352.2	343.2	325.2	328.3	321.7
GATOR complex protein NPRL3	Q8VIJ8	Nprl3	63.6	2	5.44815	3	569	5.86	39	47.3	68	53.9	48.5	52.9	48.4	50.9	48.9	48.6	53.6	50.4	52.2	68.5	50.4	53.3
GATOR complex protein WDR24	Q8CFJ9	Wdr24	88.1	2	3.67089	2	790	5.34	197.1	192.4	184.9	185.1	194	194.5	191.9	186	194	198.9	202.1	212.1	210.5	192.5	217.5	186
GDNF family receptor alpha-1	P97785	Gfra1	51.7	6	13.2479	7	468	20.96	1100.9	1100.9	1094.3	1042.9	1029.9	1066.6	1059.5	1077.7	1079.4	1043.9	969.9	1105.4	1005	1002.3	1002.3	956.9
GDNF family receptor alpha-2	O08842	Gfra2	51.7	9	22.1983	9	464	25.41	1279.4	1362.1	1300.9	1322.6	1314.7	1328.1	1293.8	1313.5	1295.1	1329.2	1438.9	1355.4	1272.3	1264.9	1286.5	1283.2
GDP-D-glucose phosphorylase 1	Q3TLS3	Gdpgp1	42.5	5	19.9482	7	386	20.82	617.5	631.5	622.9	642.8	628.1	647	621.8	616.4	580.4	574.8	579.3	596.5	591.5	634.9	599	636
GDP-L-fucose synthase	P23591	Tsta3	35.9	4	19.3146	4	321	14.4	395.5	364.4	371.5	383.6	401.5	370.5	385.8	396.2	384.1	389.5	404.2	395.7	377	361.8	394	414.6
GDP-mannose 4,6 dehydratase	Q8K0C9	Gmds	42	5	15.8602	5	372	14.61	566.5	563.5	599.4	596.4	606.4	567.2	592.1	594.8	616.2	594.2	577.1	607.2	615.6	585	595.8	590.7
Gelsolin	P13020	Gsn	85.9	24	37.1795	40	780	129.88	4697.3	4962.3	4898.4	4994.1	4884.5	4803	4962.6	4916	5990.6	5372.9	4977	6212.6	4855.6	5005.3	5358	5450.7
Gem-associated protein 5	Q8BX17	Gemin5	166.5	3	2.99601	3	1502	11.32	343.8	356	374.3	373.2	362.8	363.6	378.4	356.9	376.3	366.6	351.8	366.7	334.9	357.8	329.9	377.7
General receptor for phosphoinositides 1-associated scaffold protein	Q9JJA9	Grasp	42.3	2	9.43878	2	392	8.22	239.7	248.4	250.8	243.1	254.3	261.4	243.7	249.8	253.8	238.3	242.8	258.4	251.9	241.4	238.9	235.5
General transcription factor 3C polypeptide 2	Q8BL74	Gtf3c2	100.2	2	3.52811	2	907	2.26
General transcription factor 3C polypeptide 4	Q8BMQ2	Gtf3c4	91.6	2	4.40636	3	817	6.43	150.8	175	178	176.7	158.8	177.5	153.4	174.8	156.7	157.4	155.4	162.1	163.1	164.3	165.9	167.4
General transcription factor IIF subunit 2	Q8R0A0	Gtf2f2	28.4	2	12.4498	2	249	5.81	121.3	135.3	121.3	129.5	125.3	128.3	123.9	135.2	130.7	123.7	114.3	117.7	124.5	125.4	117.7	113.5
General transcription factor II-I	Q9ESZ8	Gtf2i	112.2	18	26.1523	21	998	57.36	1970.4	1962	1970.8	1997.4	1945.3	1880.6	1899.6	1915	2007.7	1993.8	1994.8	2047.6	1963.5	1941.8	1994.6	1944.9
General vesicular transport factor p115	Q9Z1Z0	Uso1	106.9	29	36.0792	43	959	148.54	7155.6	7250.9	7180.8	7106.7	6879.4	6885.2	6902.4	6991.9	7286.7	7338.2	7144.6	7423.5	6744.2	6984.7	7017.4	7008.4
Gephyrin	Q8BUV3	Gphn	83.2	34	56.827	56	769	152.71	7716.1	7846.5	7669	7641.8	7764.7	7816.7	7787.8	7835.6	7549.4	7573	7233.2	7582.6	7564.9	7597.8	7504.5	7392
Geranylgeranyl pyrophosphate synthase	Q9WTN0	Ggps1	34.7	5	16.6667	5	300	12.42	852.9	873.1	826.3	856.5	832.3	830.9	829.1	815.3	867.3	859.3	840.3	873.9	798.6	818.5	822.2	853.3
Geranylgeranyl transferase type-2 subunit alpha	Q9JHK4	Rabggta	64.9	26	57.3192	40	567	139.97	4143.4	4151.6	4111.5	4148.3	4154.1	4109.7	4154.2	4068.8	4026.9	4108.3	3949.8	4028	4035.6	4077.4	4102.5	4068.6
Geranylgeranyl transferase type-2 subunit beta	P53612	Rabggtb	37.8	2	6.48968	3	339	10.05	527	532.9	515.8	513.4	496.9	509.3	484.5	518.6	472.5	498.5	480.6	486.3	469.2	502.8	504	516.9
Girdin	Q5SNZ0	Ccdc88a	215.8	10	4.91191	11	1873	25.2	833.8	794.9	801	774.7	841.4	769.8	838.8	788.3	796.5	833.2	872.1	883.4	776.4	841.5	818	822.1
Glia maturation factor beta	Q9CQI3	Gmfb	16.7	9	73.2394	28	142	89.64	3836.6	3863.9	3770.3	3764.5	3700.8	3722.1	3806.5	3646.1	3828.3	3831.2	3839.4	3715.8	3793.5	3677.1	3635.7	3723.1
Glia-derived nexin	Q07235	Serpine2	44.2	11	33.2494	13	397	36.63	1304.8	1264.8	1362.4	1275.5	1332.7	1312.7	1299.7	1286.4	1307.8	1351.2	1428.3	1391.3	1289.3	1263.7	1272.3	1302.1
Glial fibrillary acidic protein	P03995	Gfap	49.9	53	83.7209	130	430	404.7	23428.6	23227.1	23422.3	24645.2	25785.9	26597	25573.8	25055.2	21678.1	20602.8	22288.6	20785.9	27593.3	25860.4	29684.9	30431.5
Glomulin	Q8BZM1	Glmn	67.7	4	7.21477	4	596	12.58	36.4	49.8	45.8	46.9	53.8	45.4	44.9	48.3	46	53.4	39.4	46.5	47.8	42.4	47.8	42.8
Glucocorticoid receptor	P06537	Nr3c1	86	3	4.98084	3	783	6.99	67.6	67.2	66.2	62.2	71.7	82.2	66.9	68.4	78.5	71.8	74.5	69.1	64.8	71.4	66.2	62.3
Glucosamine-6-phosphate isomerase 1	O88958	Gnpda1	32.5	8	34.2561	9	289	28.08	657.5	685.2	660.1	673.5	644.2	629.1	644.5	638.6	654.8	632.1	753.5	667.8	666	632.6	651.6	703.9
Glucosamine-6-phosphate isomerase 2	Q9CRC9	Gnpda2	31.1	10	52.5362	13	276	37.34	1779.6	1806.8	1784.5	1781.7	1717	1637.1	1699.6	1642.2	1747	1706.7	1828.1	1662.8	1768.9	1772.1	1765.9	1824.5
Glucose 1,6-bisphosphate synthase	Q8CAA7	Pgm2l1	70.2	32	58.9372	52	621	158.26	6469.3	6743.5	6331.9	6377.2	6538.4	6258.9	6592	6438.4	6502.4	6632.4	6537.7	6683.3	6459.8	6702.4	6674.4	6596.6
Glucose-6-phosphate 1-dehydrogenase X	Q00612	G6pdx	59.2	21	41.7476	31	515	91.63	4515.4	4430.3	4498.8	4568.6	4435.8	4446.6	4412.9	4402.2	4200	4176.5	4302.3	4235	4385.5	4467.3	4557.2	4533.4
Glucose-6-phosphate isomerase	P06745	Gpi	62.7	47	68.638	206	558	646.73	28151.4	27981.8	29439.2	28529.7	27964.8	28551.9	27769.8	28787.2	27861.6	26947.8	25909.5	26267.2	28250.2	28189.6	28303.4	27533.6
Glucose-fructose oxidoreductase domain-containing protein 1	Q3UHD2	Gfod1	43.3	8	29.7436	11	390	28.93	733	732.7	745.5	703.3	708.9	717.4	722.1	664.6	729.2	709.8	766	743.6	696.8	705.1	677.3	672.6
Glucose-induced degradation protein 8 homolog	Q9D7M1	Gid8	26.8	10	49.1228	15	228	41.27	1427.3	1474.5	1381.5	1361.7	1366	1308.5	1377.4	1301.7	1386.6	1423.1	1477.8	1440.5	1342	1378	1392.1	1378.3
Glucosidase 2 subunit beta	O08795	Prkcsh	58.8	18	34.9328	29	521	93.51	3279.4	3530.6	3431.6	3253.2	3308	3338	3284.5	3265.1	3526.7	3410	3382.1	3498	3232.9	3339.7	3293.1	3329.9
Glutamate decarboxylase 1	P48318	Gad1	66.6	22	41.9899	41	593	143.4	4406.7	4337.1	4233.6	4425.4	4341.1	4205.7	4369.4	4274.3	4037.6	4197.1	4303.8	3854	4394.5	4488.4	4348.2	4334.2
Glutamate decarboxylase 2	P48320	Gad2	65.2	23	46.4957	47	585	152.3	6412.1	6346.5	6262.6	6569.4	6761	6618.6	6510.3	6462.9	6023.1	6060.1	6381.3	5803.3	6511.4	6422.2	6511.2	6146.8
Glutamate dehydrogenase 1, mitochondrial	P26443	Glud1	61.3	43	71.5054	151	558	506.85	35698.4	34864.9	34925.8	35902.1	36192.4	36810.1	35016.1	36394.6	33862	34791.5	35380	34075.1	35853.4	35974.9	36129.5	36112.2
Glutamate receptor 1	P23818	Gria1	101.5	42	42.0066	91	907	290.67	9699.5	9911.3	9912.8	9206.4	9768.4	9479.3	10283.9	9858.2	10442.2	9782.2	7853.3	10502.4	9602.6	10199.6	9686.2	9089.1
Glutamate receptor 2	P23819	Gria2	98.6	53	53.9071	131	883	461.09	24445.7	24889.5	24685	23309	23815.7	22708.5	24598.7	24066.9	24680	24646.8	20061.3	24528.3	23030.4	24877	24033	22714.2
Glutamate receptor 3	Q9Z2W9	Gria3	100.5	33	39.6396	53	888	169.84	6268.8	6356	6402.3	6195.7	6486.7	6414.8	6641.1	6337.9	6548.1	6613.1	6068.2	6716.3	6195.5	6536.1	6506.1	6175.9
Glutamate receptor 4	Q9Z2W8	Gria4	100.8	15	18.5144	27	902	89.95	376.6	395.6	420.1	388.9	409.6	382.3	371.7	382.9	395.7	416	432.2	408.8	395.9	379.1	388.8	406.5
Glutamate receptor ionotropic, delta-1	Q61627	Grid1	112.1	6	11.1001	6	1009	19.08	290.6	305.2	312.1	308.1	306.6	301.1	282.7	306.2	296.6	313.7	300.9	309.6	296.6	287.1	292.9	303.2
Glutamate receptor ionotropic, kainate 2	P39087	Grik2	102.4	5	6.4978	6	908	17.31	346.5	364.7	361.1	353.6	363.2	355.9	367	330	371.4	346.1	373.9	369.3	357	346.9	361	365.5
Glutamate receptor ionotropic, kainate 3	B1AS29	Grik3	104	3	4.02612	4	919	11.33	341.3	360.5	333.2	367.7	364.9	396.7	356.8	370.1	351.4	342.5	383.2	352.5	369.8	330.3	343.3	347.7
Glutamate receptor ionotropic, kainate 5	Q61626	Grik5	109.2	3	3.37079	3	979	4.18	198.1	198.5	188.6	176.7	184.8	179.5	188.6	163.7	181.1	172.4	172.1	174.6	169.6	177.1	175.2	177.9
Glutamate receptor ionotropic, NMDA 1	P35438	Grin1	105.4	37	34.968	57	938	154.95	9109	9264.9	9007.3	8702.6	8596.5	8584.6	8710	8719.2	8794.6	8843.3	7748.8	9037.7	8116.4	8615.8	8559	8002.4
Glutamate receptor ionotropic, NMDA 2A	P35436	Grin2a	165.3	29	25.0683	39	1464	115.28	2820.8	2873.3	2929.6	2760.8	2756.1	2750.2	2758.6	2720.1	3001.4	2801.2	2479.2	2858.2	2661	2728.3	2701.7	2583.4
Glutamate receptor ionotropic, NMDA 2B	Q01097	Grin2b	165.9	46	35.5601	74	1482	227.59	9256.5	9427	9461.6	9048.4	9148.6	9146.9	9147.6	9221.2	9427.9	9424.8	8583.2	9689.5	8802.5	8960.8	8943.6	8452
Glutamate receptor-interacting protein 1	Q925T6	Grip1	122	7	11.2689	10	1127	34.79	546.7	497.4	528.2	506.2	534	512.6	537.5	525	558.7	565.8	568.9	537.8	525.3	534.6	526.4	525.3
Glutamate--cysteine ligase catalytic subunit	P97494	Gclc	72.5	15	27.4725	18	637	57.88	1991.2	1954.4	2002.7	2056.3	2004	2051.2	1958.9	1984.2	1991.4	1946.7	1895.6	2005.9	1930.4	1992.9	2023.6	1945.5
Glutamate--cysteine ligase regulatory subunit	O09172	Gclm	30.5	8	35.7664	13	274	39.57	1349.6	1315.8	1279.5	1308.7	1309.5	1259.5	1303.2	1261.3	1369.7	1336.7	1418.3	1419	1314.1	1289.2	1292.6	1324.2
Glutaminase kidney isoform, mitochondrial	D3Z7P3	Gls	73.9	45	70.6231	113	674	354.57	18164.1	17123.7	17787.2	17602.8	17002.5	16611	17063.4	16967.6	17786.9	18085.8	17607.6	17189.8	17151.1	17171	17085.7	16819.8
Glutaminase liver isoform, mitochondrial	Q571F8	Gls2	66.3	2	3.65449	3	602	8.01
Glutamine amidotransferase-like class 1 domain-containing protein 1	Q8BFQ8	Gatd1	23.3	9	68.1818	14	220	60.86	1101.6	1075.2	1136.7	1140	1173.2	1195	1202	1161.9	1195.2	1141.4	1242.5	1147.3	1210.2	1152	1164.3	1164.4
Glutamine amidotransferase-like class 1 domain-containing protein 3A, mitochondrial	Q9D172	Gatd3a	28.1	16	63.9098	61	266	239.35	11387.2	10888.8	10891.6	10957.3	11504.4	11700.8	11355.1	11251.3	9957.9	9947.7	10168.3	9388.6	11343.4	11148.8	11277.3	11188.5
Glutamine synthetase	P15105	Glul	42.1	27	70.7775	146	373	470.9	27550.1	26907.5	26755.7	26449.5	28473.1	28167.2	28379.8	28537.1	26278.9	27367.8	27522.8	25887.5	28820.3	28550.9	27719	27841.1
Glutamine--fructose-6-phosphate aminotransferase [isomerizing] 1	P47856	Gfpt1	78.5	6	12.1951	6	697	19.01	622.2	608.1	634.9	651.4	661.5	666.4	661.9	619.7	654.3	650.2	670.6	691.2	637.7	648.3	657.6	660.5
Glutamine-rich protein 1	Q3UA37	Qrich1	86.5	3	3.861	3	777	4.96	620.7	625	589	562.9	630.5	621.9	601.8	588.6	604	631.6	620.1	639.1	629.3	607.6	630.2	622.9
Glutamine--tRNA ligase	Q8BML9	Qars	87.6	18	28	20	775	56.85	2499.6	2578.6	2557.1	2563.5	2559.3	2587.4	2523.9	2612.9	2643.9	2678.1	2718.4	2829.7	2562.2	2490	2556.7	2560.3
Glutamyl-tRNA(Gln) amidotransferase subunit A, mitochondrial	Q9CZN8	Qrsl1	56.7	2	5.14286	3	525	13.64	315.6	329.6	313.6	343.2	328	311.2	298.7	311.3	341.7	344	336.5	331.2	306.7	311.1	322.4	310
Glutamyl-tRNA(Gln) amidotransferase subunit B, mitochondrial	Q99JT1	Gatb	62.1	4	10.2334	4	557	6.66	132.5	129	132.9	132.5	146.3	120.3	141.9	136.5	136.5	128.8	153.2	145.7	127.6	124.2	138.8	143.8
Glutamyl-tRNA(Gln) amidotransferase subunit C, mitochondrial	Q8CBY0	Gatc	16.7	2	12.9032	2	155	4.44	102.9	108.4	105.4	96.1	105.4	94.5	98.7	95.1	89	85.2	112.5	98	113	93.3	97	102
Glutaredoxin-1	Q9QUH0	Glrx	11.9	5	51.4019	12	107	42.67	1375.1	1353.6	1357.5	1309.9	1366.4	1328.7	1386.2	1298.9	1394.5	1387.3	1558	1304.8	1458.6	1316.7	1319.2	1484
Glutaredoxin-2, mitochondrial	Q923X4	Glrx2	17.3	4	32.6923	5	156	14.14	680.6	656.1	643.8	651.7	643.1	635.3	645.2	628.1	635	623.9	628.9	636.5	642.2	629.8	638.1	655.6
Glutaredoxin-3	Q9CQM9	Glrx3	37.8	19	58.457	32	337	94.45	3102.5	3284.1	3363.4	3209.8	3247.2	3249.1	3389.5	3275.7	3389.2	3237.6	3266	3312.8	3214.5	3262.3	3089.4	3247.6
Glutaredoxin-related protein 5, mitochondrial	Q80Y14	Glrx5	16.3	4	34.8684	7	152	24.25	762.3	753.8	732.8	746.7	799.3	803.3	772.6	793.8	857.2	878.7	867.1	910.5	745.3	768.2	767.1	786.2
Glutaryl-CoA dehydrogenase, mitochondrial	Q60759	Gcdh	48.6	10	33.3333	11	438	31.41	604.9	635.6	603.1	658.8	611.9	591.8	582.8	570	614.6	644.7	677.3	604.9	597.9	615.2	613.6	624.8
Glutathione hydrolase 7	Q99JP7	Ggt7	70.2	13	26.8882	24	662	92.59	2756.9	2954.2	2888.9	2954.2	2875.2	2936.2	2941.6	2958.3	2861.5	2840.1	2799.7	2767	2819.6	2901.5	2858.2	2922.1
Glutathione peroxidase 1	P11352	Gpx1	22.3	10	64.1791	12	201	26.48	1525.3	1530.5	1521.9	1502	1606.6	1533.9	1518	1537.7	1436.9	1445.7	1565.3	1448.8	1573.7	1514.3	1573.7	1592.6
Glutathione reductase, mitochondrial	P47791	Gsr	53.6	15	41.8	22	500	74.3	1839.1	2252.5	1989.1	2141.6	2019.9	2158.6	2312.7	2186.6	1899.8	1679	2135.8	1820	2345.4	2177.1	1845.2	2087.2
Glutathione S-transferase A4	P24472	Gsta4	25.5	15	61.2613	39	222	98.55	3911.1	3978.2	3912.6	3956.8	3584.3	3543.5	3598.7	3605.3	3515.1	3514.2	3263.6	3353.6	3451.1	3478.5	3567.1	3619.4
Glutathione S-transferase kappa 1	Q9DCM2	Gstk1	25.7	9	45.5752	11	226	33.27	1849.9	1987.2	1946.6	2031.6	1847.8	1829.7	1879.1	1805.5	1828.9	1840.6	1888.3	1773.5	1914.7	1882.6	1915.7	1896.7
Glutathione S-transferase LANCL1	O89112	Lancl1	45.3	18	56.391	29	399	96.91	3713.2	3809	3648.9	3754.2	3531.9	3381.9	3545	3594.4	3486.3	3582.3	3594.7	3375.6	3679.7	3612.1	3573.9	3776.3
Glutathione S-transferase Mu 1	P10649	Gstm1	26	25	83.0275	95	218	274.92	19085.2	19628.2	19092.9	19286.2	17263.3	16925.1	16890.6	17027.1	15989.6	16288.7	16630.6	14244.3	18080.7	17160.9	17206.1	17825.9
Glutathione S-transferase Mu 2	P15626	Gstm2	25.7	11	44.4954	22	218	74.58	216.1	269.2	223.6	225.2	220.7	195.1	181.1	183.1	198.5	220.8	273.4	190	231.1	201.4	227.9	248.5
Glutathione S-transferase Mu 5	P48774	Gstm5	26.6	23	85.2679	47	224	127.84	6496	6912.9	6787	6850.8	6090.9	5800.7	6161.2	6107.9	6377.1	6467.3	6384	6175.3	6228.5	6501.1	6205.3	6664.8
Glutathione S-transferase Mu 7	Q80W21	Gstm7	25.7	16	69.7248	30	218	98.48	1517.2	1522.9	1554.1	1481.8	1433.2	1385.1	1484.7	1458.4	1343.7	1282.7	1250.7	1224.6	1490.2	1490.5	1454.7	1496.5
Glutathione S-transferase omega-1	O09131	Gsto1	27.5	14	63.75	21	240	48.38	3045.3	3066.2	3160.1	3153.6	3032.1	2921.7	2943	3093.3	2935.2	3040.3	3010.2	2953.4	2982.8	2978.9	2894.7	2993.4
Glutathione S-transferase P 1	P19157	Gstp1	23.6	13	63.8095	45	210	160.93	8099.5	7723.3	8074.1	8258.1	7985.6	8300.2	8195.1	8201.7	7267.6	6901.8	7140	6733.6	8586.3	8114.6	8173.3	8589.3
Glutathione S-transferase theta-1	Q64471	Gstt1	27.4	3	13.75	3	240	9.28	440.2	464.6	460.6	447.3	419.5	400.3	406.5	426.3	389.9	398.4	414.1	385.9	398.2	423.3	420.6	445.8
Glutathione synthetase	P51855	Gss	52.2	21	47.6793	31	474	100.38	3398.1	3409.5	3424.5	3409.9	3497.2	3425.3	3542.4	3487.5	3515.9	3395	3435.5	3355.5	3486.7	3516.6	3459.1	3645.9
Glyceraldehyde-3-phosphate dehydrogenase	P16858	Gapdh	35.8	38	83.4835	976	333	2721.59	79935.1	77169.2	80087.4	78694.6	78697.7	79594.1	79323.4	78765	77735.9	76767.8	75371.2	74142.2	79963.9	79485.9	79456.6	78525.4
Glycerol kinase	Q64516	Gk	61.2	28	55.814	50	559	172.16	4416.2	4510.5	4483.8	4389.2	4318.8	4155.9	4298.8	4337.6	4016.8	4150.8	3951.3	3884.4	4144.8	4353.8	4300.1	4255.2
Glycerol-3-phosphate acyltransferase 4	Q8K2C8	Gpat4	52.1	4	12.7193	5	456	14.11	253.8	255.3	262	261.4	243.6	272.2	256.6	263.7	271.6	260.1	264	286.5	257.4	251.8	255.8	240.4
Glycerol-3-phosphate dehydrogenase [NAD(+)], cytoplasmic	P13707	Gpd1	37.5	28	87.3926	85	349	255.57	10752.2	11153.3	11017.4	10729.2	10807.8	10716.8	11035.7	11031.2	10887.4	10475.2	9815.2	10349	10958.8	11051.9	11004.7	10920.6
Glycerol-3-phosphate dehydrogenase 1-like protein	Q3ULJ0	Gpd1l	38.2	21	65.2422	49	351	143.08	8115.9	7764.8	7910.2	7982.3	7940.7	8108.9	8144.9	8046.3	7906.5	8225.3	7916.6	8060.9	7914.4	8069.7	8192.4	8040
Glycerol-3-phosphate dehydrogenase, mitochondrial	Q64521	Gpd2	80.9	60	82.2558	165	727	593.98	24839.1	24108.5	24779.4	23571.4	24772.9	24383	24263.5	24292.7	23208.4	23440.9	22113	23008.5	23832.6	23962.5	24130	23413.8
Glycerol-3-phosphate phosphatase	Q8CHP8	Pgp	34.5	16	71.028	36	321	92.34	3843.5	3798.5	3838.5	3803.8	3857.9	3768	3900.4	3825	3656.9	3688.6	3632	3620	3780.3	3755.8	3778.3	3880.7
Glycerophosphocholine phosphodiesterase GPCPD1	Q8C0L9	Gpcpd1	76.5	7	14.2222	9	675	25.02	892.2	897.5	890.9	851.7	932.2	1010.2	929.8	938.3	900.6	897.8	867.9	920.7	866.6	909.7	891.6	863.5
Glycerophosphodiester phosphodiesterase 1	Q9JL56	Gde1	37.6	6	20.5438	7	331	16.63	710.7	708.5	737.9	757.8	738.5	758.7	740.3	723.6	761.8	747.8	748.8	775.5	703	705.4	718.3	690.1
Glycine amidinotransferase, mitochondrial	Q9D964	Gatm	48.3	7	23.1678	10	423	31.86	729	720.7	735.5	736.9	773.1	790.4	778.6	748.5	784.6	744.1	771.6	787.5	712.7	724.2	753.8	755.2
Glycine dehydrogenase (decarboxylating), mitochondrial	Q91W43	Gldc	113.2	14	18.3415	16	1025	50.19	1891.4	1879.2	1881	1812.6	1807.5	1814.6	1767.9	1790.8	1767.5	1831	1768.6	1784.5	1705.6	1787.6	1750.1	1837.3
Glycine--tRNA ligase	Q9CZD3	Gars	81.8	37	53.6351	59	729	167.71	7025.9	7012.5	6976.4	7005.2	7126.9	7011.7	7095.2	7022.6	7123.9	7101.8	7034.7	7312.7	7071.4	7114.5	7206	7180.3
Glycogen [starch] synthase, muscle	Q9Z1E4	Gys1	83.9	6	12.6016	7	738	20.99	593.5	580.4	568.6	556.1	588.2	549.3	559	545.5	556	545.7	567.9	513.6	546	553	566.2	523
Glycogen phosphorylase, brain form	Q8CI94	Pygb	96.7	76	75.5635	213	843	718.25	35281.8	35616.3	35463.6	35468.3	33869	32811.3	33845.6	33915.3	32087.7	32271.9	30877.9	30409.6	34377.1	35163.4	35143.5	34710.2
Glycogen phosphorylase, liver form	Q9ET01	Pygl	97.4	15	16.8235	29	850	68.21	197.6	217.3	208.8	214.9	180.2	195.5	185.4	191.9	186.2	200.2	186.6	181.5	169.8	187.5	182.1	186.9
Glycogen phosphorylase, muscle form	Q9WUB3	Pygm	97.2	53	64.3705	96	842	287.37	8138.8	8306.1	7854.7	8049.1	7481.2	7044	7091.5	7203.9	7551.4	7920.5	8520.3	7121.8	7336.8	7401.9	7525.3	7647
Glycogen synthase kinase-3 alpha	Q2NL51	Gsk3a	51.6	18	45.5102	40	490	149.12	2497.3	2431.7	2562.4	2437.5	2572.2	2588.4	2544.5	2542.8	2563.3	2537.5	2512.4	2572.7	2502.5	2436	2555.5	2464.7
Glycogen synthase kinase-3 beta	Q9WV60	Gsk3b	46.7	23	66.6667	46	420	165.76	7053.1	7137.4	7114.7	7150.1	7233.7	7397.6	7300.3	7395.3	7419.6	7607.5	7195.3	7810.6	7146.8	7311.6	7182.7	6976.6
Glycogenin-1	Q9R062	Gyg1	37.4	5	14.7147	7	333	25.89	1522	1465.8	1517.1	1518.2	1510.6	1500.5	1521.9	1476.7	1556	1523.7	1514	1533.2	1502.1	1514.2	1516.7	1600.9
Glycolipid transfer protein	Q9JL62	Gltp	23.7	8	47.8469	19	209	45.71	2229.6	2321.2	2376.5	2522.7	2189.3	2273.8	2443.8	2371.7	2236.4	2159.7	1925.1	2285.9	2311.4	2359.1	2437.4	2551.5
Glycosaminoglycan xylosylkinase	Q8VCS3	Fam20b	46.6	2	6.84597	2	409	6.51	251.9	233.9	252.6	225.3	227.1	225.9	223.5	222.5	221.7	223.4	201	221.6	203.7	199.1	217	213.5
Glycylpeptide N-tetradecanoyltransferase 1	O70310	Nmt1	56.9	17	39.7177	29	496	87.15	3165.5	3225.8	3106	3109.7	3079.8	3142.2	3211.1	3056.2	3310.5	3292	3108	3260.5	3193.6	3207.4	3103	2991.3
Glycylpeptide N-tetradecanoyltransferase 2	O70311	Nmt2	60.4	11	23.0624	16	529	52	1672.5	1668	1668.1	1685.5	1636.9	1683.4	1758.7	1697.2	1740.9	1711.3	1745	1707.6	1670.4	1590.6	1639.5	1670.2
Glyoxalase domain-containing protein 4	Q9CPV4	Glod4	33.3	23	79.5302	67	298	235.44	11291.4	11125.3	11166.5	11853.4	10937.9	10918	11146.4	10885.9	10841.1	10345	11167.3	10255.5	11540.5	10965.6	11154.6	12116.5
Glyoxylate reductase/hydroxypyruvate reductase	Q91Z53	Grhpr	35.3	10	39.0244	22	328	84.99	3162.4	3028.2	3038	2999.4	2920.2	2843.4	2923.6	2937.8	2773.3	2763.5	2714.5	2557.2	2896.6	2895.4	2956.6	2943.6
Glypican-1	Q9QZF2	Gpc1	61.3	22	50.2693	33	557	114.17	3905.6	3963.1	4023.7	3822.7	3973.3	4079.5	4227.7	4074.6	4391.6	4105	3657	4487.8	3939.2	4108.1	3895.8	3739.1
Glypican-4	P51655	Gpc4	62.5	14	33.2136	17	557	51.72	1942.6	1981.2	1988.6	1884.8	1979.9	1889.3	1859.8	1953.1	1895.8	1948.6	1902.1	1954	1963.5	1856	1924.3	1924
Glypican-5	Q8CAL5	Gpc5	63.8	3	5.94406	3	572	8.33	127	187.9	121.7	152.6	107.9	118.3	116.2	118.1	95.1	115.6	108.2	111.8	96	112.4	145.9	99.2
Glypican-6	Q9R087	Gpc6	63	3	6.84685	6	555	18.59	145.3	139.5	135.9	143.5	134.9	140.2	133.3	146.7	143.8	149.5	146.7	142.6	144.4	130.1	140	133.5
GMP reductase 1	Q9DCZ1	Gmpr	37.5	12	48.6957	26	345	76.93	2892.8	2989.6	3105.9	3041.8	3052.8	3186.1	3121.9	3153.2	3120.1	2997	2831	3088.1	3489.7	3052.7	3014.5	3039.1
GMP reductase 2	Q99L27	Gmpr2	38	6	21.8391	6	348	19.72	392.4	386	410.1	421.4	394.5	429.8	414.3	418.4	428.7	413.2	434.6	435	423.8	404.3	383.9	400
GMP synthase [glutamine-hydrolyzing]	Q3THK7	Gmps	76.7	36	62.482	57	693	206.13	7576.7	7496	7605.3	7801.8	7557.5	7602.9	7347.5	7348.8	7496.7	7553.4	7892.6	7568.6	7403.2	7175.9	7329.3	7206.9
Golgi apparatus protein 1	Q61543	Glg1	133.6	27	28.3404	37	1175	121.14	4710.5	4887	4813.7	4801.9	4889.4	4932.3	4905.2	4893	5088	5019.5	5006.4	5314.6	4794.7	4916	5015.1	4742.9
Golgi phosphoprotein 3	Q9CRA5	Golph3	33.7	6	30.2013	12	298	21.24	208.8	213.6	209.3	210.2	217.9	224.4	211.8	210	211.3	215.6	226.8	227.1	220.7	214.9	217.6	209.8
Golgi reassembly-stacking protein 1	Q91X51	Gorasp1	46.9	3	16.3677	4	446	15.9	101.1	101.6	108.2	99.3	110.5	101.1	100	107.7	86.9	99.8	103.9	102.9	103.3	98.8	100.9	98.5
Golgi reassembly-stacking protein 2	Q99JX3	Gorasp2	47	10	31.2639	17	451	60.5	2031.2	2081.1	2177.2	2141.9	2128.9	2146.7	2127	2141.1	2260.5	2210.4	2148.1	2387.2	2091.2	2073.2	2068.4	2129.2
Golgi resident protein GCP60	Q8BMP6	Acbd3	60.1	9	24.1905	11	525	36.24	914.3	905.7	875.9	870.4	896.1	840.5	835.6	827.3	849.6	922.5	853.8	897.1	841.9	860.1	863.9	919.9
Golgi SNAP receptor complex member 1	O88630	Gosr1	28.5	5	16.8	8	250	17	589	637.5	613.6	598.3	613.1	595	587.9	582.5	618.3	643.8	637.6	657.4	604	609.7	597	581.1
Golgi to ER traffic protein 4 homolog	Q9D1H7	Get4	36.5	3	10.3976	5	327	14.83	382.8	429.7	376.9	415.2	368.1	354.6	362	369.3	395.9	408	393.5	396	380.6	391.8	395.1	386
Golgi-associated PDZ and coiled-coil motif-containing protein	Q8BH60	Gopc	50.6	2	4.31965	2	463	6.07	292.5	313.5	313.4	310.3	310.1	300.6	300.1	298.7	301.8	304.6	307.9	300.2	291	289.5	307.9	306.7
Golgin subfamily A member 2	Q921M4	Golga2	113.2	12	16.016	14	999	29.35	1018.2	1011.5	979.4	1014.5	1045.3	1013.8	1029.3	973.9	1024.9	983.5	1019.7	1174.1	989.9	992.7	993	1021
Golgin subfamily A member 3	P55937	Golga3	167.1	15	12.1722	15	1487	42.41	1241.2	1284.5	1269.1	1223.4	1311.4	1337.9	1307	1329.3	1293.3	1289.5	1295.4	1335.9	1325.5	1301.6	1251.6	1283.1
Golgin subfamily A member 4	Q91VW5	Golga4	257.4	4	1.96604	4	2238	3.06	329.9	306.1	301.5	289.2	325.2	305.6	304.7	299.1	290.9	335.5	302	326.2	298.3	301.8	316.3	297.8
Golgin subfamily A member 7	Q91W53	Golga7	15.8	2	16.7883	4	137	9.08	114.3	115.1	128.4	110.2	120.1	117.1	119.9	120.4	117.7	117.6	105.8	111.3	120.4	116.2	121.4	118.2
Golgin subfamily A member 7B	Q9D428	GOLGA7B	18.3	4	23.3533	5	167	7.81	491.2	511.9	528.5	519.8	517.1	543.6	531.1	530.8	522.2	515.5	507.1	517	523.6	529.3	530	525.2
GPI inositol-deacylase	Q3UUQ7	Pgap1	104.5	2	4.55531	3	922	7.1	13	17.3	18.5	14	12.4	13.2	12.4	13	16.6	17.2	19.4	17	12.7	14.4	16.4	15.2
GPI transamidase component PIG-S	Q6PD26	Pigs	61.7	6	16.036	7	555	19.03	547.7	602	540.7	584.1	546.5	559.4	569.6	553.6	595.1	548.2	592.8	566.8	555.8	551.4	535.7	550.9
GPI transamidase component PIG-T	Q8BXQ2	Pigt	65.7	4	7.38832	5	582	8.59	398.9	406.9	402.1	392	414.2	380.7	397	386.2	389.2	394.2	376.6	391.6	378.3	397.5	383.7	399.7
GPI-anchor transamidase	Q9CXY9	Pigk	44.9	6	20.5063	8	395	18.14	409	439	442.9	439.6	409.6	396.4	423.1	390.6	483.7	458.7	469.7	471.8	416.6	419.8	429.2	421.9
G-protein coupled receptor 37-like 1	Q99JG2	Gpr37l1	52.7	3	8.73181	3	481	9.71	286.6	313.8	276.1	294.2	280.7	245.8	282.5	286	259.4	285	259.7	247.3	281	280.7	267.1	275.2
G-protein coupled receptor family C group 5 member B	Q923Z0	Gprc5b	45.9	5	12.439	5	410	16.42	838.1	804.8	816.3	824.5	851.3	822.5	872.9	850.4	709	743.2	733.5	721.9	800.8	842.9	857.1	840.7
G-protein coupled receptor-associated sorting protein 1	Q5U4C1	Gprasp1	151.6	9	8.90869	10	1347	23.85	781.5	788	832	814	883.5	864.5	822.9	818.1	804.3	794.5	810.6	805.4	805	793.8	824.1	814.4
G-protein coupled receptor-associated sorting protein 2	Q8BUY8	Gprasp2	92.7	5	7.74818	5	826	14	552	547.6	567.4	563.1	557.7	563.1	529.3	565.9	468.7	506.9	570	538.2	555.6	521.4	573.5	602.7
G-protein-signaling modulator 1	Q6IR34	Gpsm1	74.3	14	28.2318	18	673	53.02	1501.4	1498	1512.4	1600	1590.5	1567.3	1509.1	1520	1460.8	1555	1689.1	1538.9	1539	1459.1	1570.3	1539.6
G-protein-signaling modulator 2	Q8VDU0	Gpsm2	75.5	2	3.24006	2	679	8.19
GRB10-interacting GYF protein 1	Q99MR1	Gigyf1	116.2	3	6.6092	4	1044	12.88	203.5	217.6	204.7	196.7	232.7	230.5	225.5	219.2	221.6	210.7	212	221	217.5	228.3	229.3	225.5
GRB10-interacting GYF protein 2	Q6Y7W8	Gigyf2	149.1	11	11.3091	12	1291	37.97	1002.8	997.7	1014.5	1044.4	1059	1092.5	1001.8	1045.1	1010.2	1028.4	1105.1	1037.8	1035.4	1017.5	1012.7	984.4
GRB2-associated and regulator of MAPK protein	Q3UFT3	Garem1	97.2	2	4.45205	3	876	8.75	309.2	285.7	311	309.5	305.2	306.4	328.5	275.2	322.5	319.6	304.1	315.9	321.7	313.4	315.4	284.5
GRB2-associated-binding protein 1	Q9QYY0	Gab1	76.8	2	4.60432	2	695	5.7	88.6	83.6	92.7	100	90.9	96.7	89.1	90.5	83.3	89.9	88.7	98.2	91.5	74.3	88.3	93.3
G-rich sequence factor 1	Q8C5Q4	Grsf1	53	2	7.93319	2	479	8.51	313	324.8	342	334.9	313	340.9	316.4	316.3	318.2	319	333	339.4	327.7	312.2	302.5	324.3
GRIP and coiled-coil domain-containing protein 2	Q8CHG3	Gcc2	194.3	6	4.88386	7	1679	15.24	282.9	278.6	275.4	274.1	292	273.5	277.1	261.3	297.4	308.7	288.5	312.9	257	289.5	288.3	299.7
GRIP1-associated protein 1	Q8VD04	Gripap1	92.7	35	47.6427	49	806	171.08	6122.7	6237.6	6084.5	6093	6253.7	6194.8	6242.4	6215.1	6033.8	6174	6216	6169.5	6104.4	6112.5	6153.4	6209.9
Group XV phospholipase A2	Q8VEB4	Pla2g15	47.3	2	10.1942	2	412	8.21	139.6	161.6	149.8	158.9	137.5	143.2	131	139.6	141.7	132.5	128	124	135.5	141.4	136.2	141.8
Growth arrest and DNA damage-inducible proteins-interacting protein 1	Q9CR59	Gadd45gip1	25.8	3	18.018	5	222	13.89	492.6	511.2	497.4	495.7	522.7	550.3	554.8	536	542.6	561.4	532.8	569.3	507.2	518.9	511.3	522.6
Growth arrest-specific protein 7	Q60780	Gas7	48.1	18	42.0428	27	421	87.09	3570.6	3505.2	3479.6	3676.2	3628	3683.3	3375.7	3537.9	3262.6	3509.9	3634.7	3433.9	3526.8	3439	3436	3574.5
Growth factor receptor-bound protein 10	Q60760	Grb10	70.5	2	2.73752	2	621	2.05	50.5	55.2	53.3	58.9	58.2	53.3	51.7	57	58.8	48.2	45.1	48.8	51.7	53.2	53	66.4
Growth factor receptor-bound protein 2	Q60631	Grb2	25.2	16	76.4977	33	217	111.82	5352.3	5383.9	5388.8	5281.5	5286.8	5332.6	5291.5	5361.5	5193.5	5137.4	5023.4	5271.2	5249.9	5356.8	5218.8	5220.4
GrpE protein homolog 1, mitochondrial	Q99LP6	Grpel1	24.3	13	58.5253	25	217	75.9	6112.9	6182.4	6106	6198.9	6213.9	6055.2	6023.3	6154.1	5799	6104.7	6066	5865.1	5990.4	6109	6209.9	6335.5
GTP:AMP phosphotransferase AK3, mitochondrial	Q9WTP7	Ak3	25.4	20	77.0925	40	227	130.13	6296.5	6457.6	6486	6533	6267.8	6185.3	6068.1	6214.4	6309.6	6336.8	6892.4	6071.8	6158.2	6039.4	6189.5	6256.4
GTPase HRas	Q61411	Hras	21.3	12	70.3704	41	189	139.83	2188	1947.9	1882.1	1795.5	1979.2	1687.1	2010.9	1857.5	1650.4	2004.8	1620.9	1771	1760.3	2067.7	2122.5	1861.5
GTPase KRas	P32883	Kras	21.6	12	67.1958	36	189	125.97	4363.5	4189.4	4314.1	4255	4347.2	4287.8	4441.4	4360.5	4336.2	4413.6	4305.1	4454.8	4290.2	4353.7	4416	4275.6
GTPase NRas	P08556	Nras	21.2	12	70.3704	34	189	117.82	2676.8	2561.2	2694.6	2600.2	2743.6	2757.2	2684.9	2766.6	2755.6	2819	2642.1	2756.4	2758.4	2776.5	2766.7	2697.4
GTPase-activating protein and VPS9 domain-containing protein 1	Q6PAR5	Gapvd1	162.3	23	21.3992	28	1458	90.4	3403.8	3513.1	3419.6	3426.8	3447.5	3382.9	3504	3401	3459.6	3383.6	3473.3	3573.7	3378.9	3288.7	3335	3325.1
GTP-binding nuclear protein Ran	P62827	Ran	24.4	15	50.463	32	216	110.43	7071.6	7070.6	6970.7	7154.3	7094.1	7330.6	6939.6	7171.1	7189.1	7043.1	7292.1	7172.7	7222.3	7074.2	7175.4	7117.5
GTP-binding protein 1	O08582	Gtpbp1	72.3	12	24.5509	15	668	54.01	1356.2	1361.2	1361.9	1386.1	1394.5	1431	1389.8	1389	1353.8	1386.5	1409.3	1411.4	1392.3	1375.1	1394.2	1349.9
GTP-binding protein Di-Ras1	Q91Z61	Diras1	22.2	8	39.3939	13	198	35.77	1083.2	1122.9	1065.9	1077.1	1119.3	1056.2	1104.6	1070.6	1115	1122.1	1109.5	1118.9	1059.8	1120	1123.4	1125.8
GTP-binding protein Di-Ras2	Q5PR73	Diras2	22.5	13	68.8442	30	199	105.76	6171.6	6143.7	5979	5983.9	5853.5	5783.2	6042.3	5956.5	6171.4	6485.4	6018.1	6323.8	5848.8	6066.8	5975.4	5867.4
GTP-binding protein REM 2	Q8VEL9	Rem2	37.3	6	23.1672	8	341	29.27	930.1	971.3	913.6	886	901.5	888.2	991.2	936.4	921.1	855.1	775.7	980	893.7	949.7	921	917.5
GTP-binding protein Rheb	Q921J2	Rheb	20.4	12	55.9783	24	184	68.44	4265.5	4283.2	4127.6	4191.6	4096.5	4115.6	4235.2	4269.4	4227.7	4240.5	4126.3	4382.5	4168	4163.6	4337.4	4225.6
GTP-binding protein SAR1a	P36536	Sar1a	22.4	8	48.4848	20	198	55.26	599.3	616.8	664.8	635	645.4	651.3	642.5	618.4	623.2	642.9	664.2	635.2	651.1	623.9	637.1	631.5
GTP-binding protein SAR1b	Q9CQC9	Sar1b	22.4	10	62.6263	23	198	59.75	1851	1848	1790.2	1846.7	1708.2	1693.7	1774.1	1716.7	1853.8	1869.6	1883.3	1783.5	1825.9	1752.3	1792.7	1772.6
Guanidinoacetate N-methyltransferase	O35969	Gamt	26.3	8	58.8983	9	236	38.66	700.7	753.5	736.6	730.8	683.5	721.1	722.6	681.5	837	745.6	800.8	833.6	733.4	717.1	708.7	741.3
Guanine deaminase	Q9R111	Gda	51	32	75.9912	91	454	312.76	13307.5	13141.4	13132.3	13895	13586.7	13607.5	12811.8	13373.3	12817.1	13307.1	14752.6	12523.8	13838.8	12710.4	12989.4	13828.3
Guanine nucleotide exchange C9orf72 homolog	Q6DFW0		54.2	3	4.158	3	481	4.16	240.4	230.4	243.7	213.2	226	246.1	228.7	219.1	213.9	215.8	205	232.3	212.9	221.8	220.2	217.8
Guanine nucleotide exchange factor DBS	Q64096	Mcf2l	129	7	9.83464	8	1149	21.3	488.3	531.4	555.3	550.4	529	548.8	551.4	537	577.6	558.5	572.4	591.9	547.2	529.1	513.4	522.3
Guanine nucleotide exchange factor MSS4	Q91X96	Rabif	13.9	2	14.6341	2	123	3.09
Guanine nucleotide exchange protein SMCR8	Q3UMB5	Smcr8	104.9	8	11.7647	9	935	31.37	814.3	793.3	815.8	822.5	823.9	804.6	783.3	826.8	803	823.4	800	812.8	774.2	786.4	769.5	774.3
Guanine nucleotide-binding protein G(i) subunit alpha	Q9DC51	Gnai3	40.5	18	57.6271	54	354	117.13	1442.5	1525.5	1477.8	1606.2	1448.7	1510.4	1498.1	1480.7	1644.6	1604.9	1593.3	1637.6	1469	1526.4	1399.7	1500.5
Guanine nucleotide-binding protein G(i) subunit alpha-1	B2RSH2	Gnai1	40.3	24	65.8192	79	354	185.61	3140.2	3229.3	3184.7	3273.4	2973.4	2946.7	3034.9	3117.3	2763.1	2933	2889.3	2802.6	3003.8	3064.7	3079.4	3013.5
Guanine nucleotide-binding protein G(i) subunit alpha-2	P08752	Gnai2	40.5	25	74.3662	73	355	185.07	8520.4	8612.5	8639.3	8783.3	8482.5	8529.2	8486.2	8690.2	8028.1	8202.7	8399.9	7861.2	8685.5	8557.8	8756.9	8601.5
Guanine nucleotide-binding protein G(I)/G(S)/G(O) subunit gamma-10	Q9CXP8	Gng10	7.2	2	52.9412	3	68	13.27	451	416.5	420.2	442.3	430.8	420.2	406.6	408.4	377.1	415.3	414.1	396.3	421.8	420.1	429.5	433.4
Guanine nucleotide-binding protein G(I)/G(S)/G(O) subunit gamma-12	Q9DAS9	Gng12	8	6	70.8333	17	72	64.13	3236.6	3323.8	3393.9	3480.5	3122	3016.8	3217.3	3133.6	3173.4	3368.6	3123.3	3066.3	3395.8	3428.1	3402.3	3515.6
Guanine nucleotide-binding protein G(I)/G(S)/G(O) subunit gamma-13	Q9JMF3	Gng13	8	4	56.7164	8	67	23.03	1631.7	1537.3	1566.7	1697.9	1547.3	1533.4	1542.6	1469.1	1378.5	1538.3	1736.6	1319.9	1563.7	1540.5	1564.1	1559
Guanine nucleotide-binding protein G(I)/G(S)/G(O) subunit gamma-2	P63213	Gng2	7.8	7	64.7887	26	71	96.85	3981	4033.8	4045.7	3968.4	3969.8	3895.7	4030.8	3983.6	3989.9	4210.7	3999	4043.8	4001.5	4114.3	3973.6	3998
Guanine nucleotide-binding protein G(I)/G(S)/G(O) subunit gamma-3	P63216	Gng3	8.3	6	81.3333	16	75	65.6	2278.7	2234.9	2254.2	2374.9	2301.9	2350.9	2410.3	2307.7	2381.5	2503.8	2655.1	2377.8	2489.1	2477.6	2431.8	2334
Guanine nucleotide-binding protein G(I)/G(S)/G(O) subunit gamma-4	P50153	Gng4	8.4	7	65.3333	9	75	38.14	891.3	917.4	896	962.6	978.6	955.5	959	939.2	904.6	948.3	1091.8	912.6	994.7	925.7	953.9	977.1
Guanine nucleotide-binding protein G(I)/G(S)/G(O) subunit gamma-5	Q80SZ7	Gng5	7.3	4	36.7647	7	68	20.06	968.4	940.2	981.3	949	882.5	874	898.8	879.9	835.4	798.3	834.9	773.8	862.5	926	935.4	881.1
Guanine nucleotide-binding protein G(I)/G(S)/G(O) subunit gamma-7	Q61016	Gng7	7.5	5	67.6471	12	68	39.99	1801.6	1882.7	1856.1	1754.7	1841.5	1712.1	1776.8	1801.5	1607.7	1643.7	1415.7	1634.5	1714.3	1814.9	1817.3	1711.8
Guanine nucleotide-binding protein G(I)/G(S)/G(T) subunit beta-1	P62874	Gnb1	37.4	20	71.7647	214	340	597.59	18064.6	18116	18232	18379.5	17857.9	17686.6	17852.9	17787.2	16892.7	17151.1	17616.6	16002.7	18246.3	17869.1	17589.9	17498.1
Guanine nucleotide-binding protein G(I)/G(S)/G(T) subunit beta-2	P62880	Gnb2	37.3	18	69.7059	205	340	552.85	5766.3	5745.9	6005.4	6002.8	5904.4	6168.9	6010.6	5997.1	5651.1	5611.5	5787.5	5474.4	6016.2	5748.9	5729.2	5763.6
Guanine nucleotide-binding protein G(I)/G(S)/G(T) subunit beta-3	Q61011	Gnb3	37.2	3	14.1176	13	340	41.91	112.9	94.5	109.4	111.1	105.4	99.8	107	97.6	110.5	105.4	121.3	97.3	124.9	106.1	107	101.4
Guanine nucleotide-binding protein G(o) subunit alpha	P18872	Gnao1	40.1	23	60.7345	156	354	534.98	26361.6	26139.2	25968.6	26425.5	26386.4	26926.1	26595.1	26688	24365.3	25533.5	25042.9	24523.6	26371.9	26465.9	26389.9	26009.4
Guanine nucleotide-binding protein G(olf) subunit alpha	Q8CGK7	Gnal	44.3	6	20.21	15	381	34.48	120.9	108.9	110.9	115	121.4	125.2	127.3	123.6	116.9	116.4	115.7	125.3	122.3	122.2	121.4	120.6
Guanine nucleotide-binding protein G(q) subunit alpha	P21279	Gnaq	42.1	21	59.0529	44	359	125.43	5488.5	5679.8	5713.1	5809.4	5625.8	5747.3	5891.3	5789	5722.5	5612.7	5218	5556.6	5519.5	5767.6	5663	5524.7
Guanine nucleotide-binding protein G(s) subunit alpha isoforms short	P63094	Gnas	45.6	18	47.9695	36	394	87.73	3974.2	3916.1	3830.4	4015.6	3833.3	3814.1	3951.8	3867.3	3753.5	3903.7	3844.5	3777.4	3834.3	3863.4	4012	3948.2
Guanine nucleotide-binding protein G(z) subunit alpha	O70443	Gnaz	40.8	19	54.6479	55	355	167.57	7046.3	7400.2	7084.3	7275.6	6799.7	6784.6	6891.2	6957.6	6686.6	6855.2	6861.7	6613.1	6709.6	6811.1	6787.8	6610.4
Guanine nucleotide-binding protein subunit alpha-11	P21278	Gna11	42	17	52.9248	34	359	90.31	2519.1	2581.4	2518.6	2692.4	2687.3	2597.7	2668.4	2589.9	2522.5	2549	2505.2	2490.4	2596	2559.9	2605.3	2507.7
Guanine nucleotide-binding protein subunit alpha-12	P27600	Gna12	44.1	3	10.8179	13	379	24.89	46.5	56.6	49.4	50.9	61.1	56.7	48.6	54.3	50.4	45.3	54.8	56.1	50	46.6	41.8	45.2
Guanine nucleotide-binding protein subunit alpha-13	P27601	Gna13	44	21	51.1936	44	377	119.45	4453	4538.2	4473.5	4527.7	4408.2	4450.7	4485.7	4534.8	4278.4	4467	4193.3	4297	4303.3	4303.5	4468.8	4442.5
Guanine nucleotide-binding protein subunit beta-4	P29387	Gnb4	37.4	15	67.0588	45	340	152.38	1064.1	1023.5	1045.8	1094.4	1087.2	1095.9	1081.2	1081.6	1155.5	1206.4	1309.5	1242.8	1125.4	1095.6	1131.2	1093.6
Guanine nucleotide-binding protein subunit beta-5	P62881	Gnb5	43.5	13	38.2278	30	395	105.49	5053.7	5115.3	5094.4	5052.6	4953.7	4888.6	4935.9	4895.1	4687.3	4918.6	5025.3	4683	5040.7	4942.8	4925.7	4910.3
Guanine nucleotide-binding protein-like 1	P36916	Gnl1	68.7	21	49.9176	31	607	110.73	3955.4	3988.4	4055.8	4108.6	4023.7	3983.3	3989	3999.5	3950.3	4024.6	4086.4	3990.3	3927.2	3930.1	3980.1	3881
Guanine nucleotide-binding protein-like 3-like protein	Q6PGG6	Gnl3l	65.2	2	6.58579	2	577	6.55	111.3	103.9	125.7	124.3	129.1	136.3	135.1	113.8	125.1	127.9	122.2	130.1	122.5	113.9	121.1	115.8
Guanosine-3',5'-bis(diphosphate) 3'-pyrophosphohydrolase MESH1	Q9D114	Hddc3	20.2	7	43.0168	11	179	18.91	572.8	575.1	598.5	645	564	595.2	556.1	584.1	593.2	569.9	636.5	564	597.9	548.4	543.6	604.1
Guanylate cyclase soluble subunit alpha-1	Q9ERL9	Gucy1a1	77.5	2	5.20984	2	691	0	182.9	179.9	194.7	219.2	180.4	200	190.9	194.2	184.2	206.7	195.8	206.2	180.8	174.2	188.3	187.5
Guanylate cyclase soluble subunit beta-1	O54865	Gucy1b1	70.6	23	40.3226	31	620	97.67	4143.3	4146.2	4178.3	4233.2	4082.3	3999.6	3958.8	4003.8	3990.6	4218.2	4274.5	4071.1	3959.4	3940.5	4073.4	3991.2
Guanylate kinase	Q64520	Guk1	21.9	10	64.6465	18	198	68.7	1740.8	1682.6	1717.2	1739.1	1704.7	1730	1722.9	1692.5	1737.9	1710.9	1765.9	1746	1739.6	1713.8	1719.4	1816.5
Guanylate-binding protein 2	Q9Z0E6	Gbp2	66.7	2	5.09338	2	589	5.67	22.6	19.6	22	19.5	21.7	13.8	18.6	17.7	15.3	16.8	13.3	16.5	20.7	16.7	19.8	17
H(+)/Cl(-) exchange transporter 3	P51791	Clcn3	90.8	7	9.6577	7	818	16.75	1194.7	1149.6	1109.3	1187.5	1117.3	1156.1	1139.3	1232.2	1155.3	1147.5	1111.2	1172.7	1295.9	1161.7	1171.2	1136.9
H(+)/Cl(-) exchange transporter 4	Q61418	Clcn4	83.7	6	8.29987	6	747	14.41	432.7	412.9	406.6	418.2	416.5	386.8	411.9	390.1	417.5	446.9	419.3	423.5	382.6	411.4	405	395.9
H/ACA ribonucleoprotein complex subunit 1	Q9CY66	Gar1	23.5	5	29.4372	5	231	9.76	483.6	506.4	508	540.7	550.1	539.8	548.5	519.1	544	536.9	593.5	529.6	545.4	520.8	493.1	527
H/ACA ribonucleoprotein complex subunit 2	Q9CRB2	Nhp2	17.2	2	18.9542	2	153	6.86	104.4	129.4	139	152.3	128	152.5	127.5	139.6	135.7	110.2	94.2	120.1	117.9	125.5	121.4	111.4
H/ACA ribonucleoprotein complex subunit DKC1	Q9ESX5	Dkc1	57.4	6	11.9843	6	509	13.2	776.2	750.8	845.2	776.8	822.3	802.4	801.7	805.7	795.1	800.8	801.2	776.5	785.2	839	781.8	832.4
H-2 class I histocompatibility antigen, L-D alpha chain	P01897	H2-L	40.7	3	9.39227	3	362	5.27	276.3	308.9	288.6	285.4	273	238.7	239.8	276.6	259.6	254.5	269.8	271.7	263.7	265.2	241.9	275.2
Haloacid dehalogenase-like hydrolase domain-containing 5	Q91WM2	Hdhd5	46.3	5	14.7971	5	419	13.08	306.9	311.6	315.9	304.1	334.6	335.3	309.7	302.4	311.2	315	309.3	315.9	309.1	323.1	312.4	312
Haloacid dehalogenase-like hydrolase domain-containing protein 2	Q3UGR5	Hdhd2	28.7	14	72.973	36	259	109.68	4470.5	4446.6	4398.4	4467	4318.6	4198.8	4270.2	4215.1	4099.1	4136.9	4438.4	3941.9	4467.2	4264.6	4379.8	4678.2
Haloacid dehalogenase-like hydrolase domain-containing protein 3	Q9CYW4	Hdhd3	28	9	43.8247	12	251	38.22	1393	1427.9	1456.4	1468.5	1338.7	1262.6	1307.7	1316.8	1377.5	1346	1384.2	1295.4	1365.5	1373.1	1355.7	1413.8
Hamartin	Q9EP53	Tsc1	128.7	11	11.3695	18	1161	25.56	403.3	397.2	402.3	405	390.3	398.8	377.5	404.5	366.7	419.7	380	397	371.4	399	382.2	401.4
HBS1-like protein	Q69ZS7	Hbs1l	75.1	2	3.66569	3	682	7.83	350.2	336.8	353.5	334.9	364.1	385.8	380	371.9	361.2	350.5	339.6	389.9	369.6	352.9	353.5	350.2
HCLS1-associated protein X-1	O35387	Hax1	31.6	5	36.4286	6	280	25.38	430.8	428.6	434.1	444.3	424.6	420.6	430.4	446.6	427.1	413.6	428	407	406.3	436.9	398.5	413.4
HCLS1-binding protein 3	Q3TC93	Hs1bp3	43.7	4	25.5696	7	395	32.64	626.6	658.6	659.4	635.8	661.5	669.7	635.9	667.8	639.9	632	636.1	679.1	639.3	635.4	620.9	678.6
HD domain-containing protein 2	Q3SXD3	Hddc2	22.7	10	71.8593	17	199	66.31	2312.6	2300.1	2347.2	2394.9	2303.9	2322.5	2323.1	2239.7	2394.7	2298.8	2474.1	2370.7	2302	2247.7	2234.2	2349.5
HEAT repeat-containing protein 5B	Q8C547	Heatr5b	224.2	6	3.71981	6	2070	15.32	317.2	331.8	303.6	324.4	304	292.3	304.5	283.1	321.6	332.3	333.9	311.4	319.7	309.8	310.6	301.1
[truncated: 2,930 more rows]

## Sheet: Sheet2
	Investigator sample name	Sample number	MS file number		TMTpro tag	Sample ID
			Fusion Lumos		126	A-1
1	Yan 3.9.22 mouse brain TMTpro 16plex Fraction 1	SB19-151-32	Lum_22apr0105		127N	A-2
2	Yan 3.9.22 mouse brain TMTpro 16plex Fraction 2	SB19-151-33	Lum_22apr0106		127C	A-3
3	Yan 3.9.22 mouse brain TMTpro 16plex Fraction 3	SB19-151-34	Lum_22apr0107		128N	A-4
4	Yan 3.9.22 mouse brain TMTpro 16plex Fraction 4	SB19-151-35	Lum_22apr0108		128C	B-1
5	Yan 3.9.22 mouse brain TMTpro 16plex Fraction 5	SB19-151-36	Lum_22apr0109		129N	B-2
6	Yan 3.9.22 mouse brain TMTpro 16plex Fraction 6	SB19-151-37	Lum_22apr0110		129C	B-3
7	Yan 3.9.22 mouse brain TMTpro 16plex Fraction 7	SB19-151-38	Lum_22apr0111		130N	B-4
8	Yan 3.9.22 mouse brain TMTpro 16plex Fraction 8	SB19-151-39	Lum_22apr0112		130C	C-1
9	Yan 3.9.22 mouse brain TMTpro 16plex Fraction 9	SB19-151-40	Lum_22apr0113		131N	C-2
10	Yan 3.9.22 mouse brain TMTpro 16plex Fraction 10	SB19-151-41	Lum_22apr0114		131C	C-3
					132N	C-4
					132C	D-1
					133N	D-2
					133C	D-3
					134	D-4

## Sheet: Sheet3
Description	Accession	Gene	WT-1	WT-2	WT-3	WT-4	FXS-1	FXS-2	FXS-3	FXS-4	FXS/WT ratio	p value
Suppressor of IKBKE 1	Q9CPR7	Sike1	157.1	236.3	205.7	257.4	115.2	107.7	110.2	103	0.509165	0.00301578
Polyglutamine-binding protein 1	Q91VJ5	Pqbp1	301.5	585.8	202.8	229.7	234.1	209.9	192.9	196.8	0.631687	0.217809
Tropomyosin beta chain	P58774	Tpm2	131.9	190.8	136.9	114.9	126.2	81.6	68.9	89.4	0.63725	0.0441073
Histone H3.3	P84244	H3f3a	7072.6	5915.1	6327.7	6088	4101.3	4497.6	4429	4356.9	0.684349	0.000302809
Collagen alpha-2(I) chain	Q01149	Col1a2	1388.6	2065.9	1345.9	1164.9	1365.6	1015.5	764.8	965.9	0.689286	0.0947111
Collagen alpha-1(I) chain	P11087	Col1a1	1383	1986.3	1278.3	1191	1315.2	1034.5	756	981.3	0.699997	0.0860814
Histone H4	P62806	Hist1h4a	10503.7	10180.2	10483.5	10753.5	6805.7	7595	7763	7745.1	0.713458	2.29095e-05
Retinal dehydrogenase 2	Q62148	Aldh1a2	394.8	544.4	419.7	380.4	386.2	301.9	268.1	300.5	0.722532	0.0368788
Apolipoprotein C-III	P33622	Apoc3	536.1	619.1	549.4	560.6	501.2	410.1	375.2	404.7	0.746601	0.0047014
DNA-binding protein SATB1	Q60611	Satb1	538.7	483.3	505.8	496.6	358.5	404.6	378.7	389.8	0.75657	0.000195338
Membrane primary amine oxidase	O70423	Aoc3	134.5	178.1	138.2	137.2	131.9	102.1	104.3	107.5	0.758163	0.0292452
Transgelin	P37804	Tagln	2728.1	3425.5	2795	2469.6	2849.7	2057.1	1823.5	2036.3	0.767774	0.0715649
Basal cell adhesion molecule	Q9R069	Bcam	237.8	244.7	227.5	213	196.3	177.8	162.4	177.7	0.773781	0.00176295
Biglycan	P28653	Bgn	106.4	137.6	109.4	108.8	110.4	84.1	82.5	80.8	0.774124	0.0427088
Fibronectin	P11276	Fn1	299.4	411.6	299	295.8	294.4	252.8	217.4	249	0.776229	0.0656241
Glypican-5	Q8CAL5	Gpc5	127	187.9	121.7	152.6	107.9	118.3	116.2	118.1	0.781568	0.0804459
Myosin-11	O08638	Myh11	7595.1	9277	7660.6	7080.5	7964	5833.5	5303	6124.7	0.797933	0.0769276
Fibulin-5	Q9WVH9	Fbln5	376.6	499.7	409.1	355.9	428.8	313.9	268.1	302.3	0.800037	0.132589
Folate receptor alpha	P35846	Folr1	1186.9	1400.8	1316	1411.3	1108.4	1076.7	1043.7	1039.2	0.80301	0.0029452
Actin-binding LIM protein 3	Q69ZX8	Ablim3	161	191.3	146.6	149.9	136.6	134.4	121.5	132.3	0.808878	0.0275752
GPI inositol-deacylase	Q3UUQ7	Pgap1	13	17.3	18.5	14	12.4	13.2	12.4	13	0.812102	0.0677091
Protein SAAL1	Q9D2C2	Saal1	68.5	84.3	65.4	67.6	66.5	58.9	58.9	49.4	0.817705	0.0579837
Protein TANC1	Q0VGY8	Tanc1	199.9	196	196.3	186.1	166.7	168.9	153.6	150.2	0.821534	0.000754406
Filamin-A	Q8BTM8	Flna	6018.7	7676.4	6272.3	5927.4	6397.2	5014.2	4714.7	5206.9	0.823833	0.0833076
Gamma-aminobutyric acid receptor subunit gamma-1	Q9R0Y8	Gabrg1	41.5	34.5	29.9	36.2	32.2	29.9	27.2	27.8	0.824068	0.0564056
Apolipoprotein A-I	Q00623	Apoa1	6555.3	7945.6	6612.7	6773.6	6463.3	5602.4	5276.3	5665.8	0.825031	0.0256171
EKC/KEOPS complex subunit Tp53rk	Q99PW4	Tp53rk	259.4	267.5	258.2	197.3	213.6	196.2	201.3	203.1	0.828787	0.0448426
Actin, aortic smooth muscle	P62737	Acta2	283.9	369	397.9	355.9	351.3	282.7	245.4	286.7	0.828961	0.115678
Annexin A1	P10107	Anxa1	150.1	188.6	190.5	165.5	157.6	140.8	140.5	139.5	0.83259	0.0338948
Glutathione S-transferase Mu 2	P15626	Gstm2	216.1	269.2	223.6	225.2	220.7	195.1	181.1	183.1	0.835028	0.0435044
Myosin regulatory light polypeptide 9	Q9CQ19	Myl9	332.1	411.2	326.7	314.8	349.8	287.9	256.4	265.5	0.837377	0.113607
Activity-dependent neuroprotector homeobox protein	Q9Z103	Adnp	367.9	516.2	351.8	440.3	336.5	393.8	311.2	365.2	0.83922	0.157183
Pregnancy zone protein	Q61838	Pzp	4883.2	5507.1	5057.3	5118.4	4850.1	4293.4	4021.3	4097.5	0.839361	0.0112403
Carbonic anhydrase 1	P13634	Ca1	896.3	1140.5	1035.4	1053.5	923.9	877.9	836.2	836.6	0.842184	0.024735
YrdC domain-containing protein, mitochondrial	Q3U5F4	Yrdc	10.2	10	13.1	13.2	7.6	11.5	9.7	10.5	0.845161	0.187265
Hemopexin	Q91X72	Hpx	3052.4	3370.8	3330.6	3288.9	3024.3	2682.9	2636.7	2680.4	0.845247	0.00461284
D-dopachrome decarboxylase	O35215	Ddt	3111.1	3141.2	2899.7	2773.5	2394.8	2412.2	2601.3	2677.5	0.845734	0.00635302
Immunoglobulin kappa constant	P01837	Igkc	337	315.7	297.6	259.3	261.4	262.5	247.4	252.8	0.846644	0.0332513
Caveolae-associated protein 1	O54724	Cavin1	512.2	588.6	535.5	499.7	502.7	457.7	416.9	431.4	0.84677	0.0238379
45 kDa calcium-binding protein	Q61112	Sdf4	17	23.5	19.7	14.9	14.8	13.3	17.2	18.4	0.848202	0.239783
Tubulointerstitial nephritis antigen-like	Q99JR5	Tinagl1	824.2	916.6	840.4	814.5	792.5	667.6	709.2	711.4	0.848338	0.0102583
RING finger and SPRY domain-containing protein 1	Q8BVR6	Rspry1	81.3	75.8	71.1	64.3	61.1	61	60.5	65.6	0.848547	0.0267348
Vitamin D-binding protein	P21614	Gc	701	798	721.8	770.4	697	606.6	640.1	595.3	0.848823	0.0120298
Calcium-binding protein 39-like	Q9DB16	Cab39l	336.3	408.2	349.1	417	331.6	313.9	306.4	332.5	0.850258	0.0386487
Annexin A2	P07356	Anxa2	2658.3	3091.8	2883.4	2654	2690	2417.3	2205	2325.3	0.853829	0.0309044
RAS guanyl-releasing protein 2	Q9QUG9	Rasgrp2	44	47.9	47.8	39.4	39.3	33.1	44.8	35.8	0.854271	0.0896265
Chloride intracellular channel protein 5	Q8BXK9	Clic5	43.6	40.4	34.8	47.2	41.4	33	33.6	33.9	0.854819	0.117162
NPC intracellular cholesterol transporter 2	Q9Z0J0	Npc2	284.6	273.7	251.7	252.2	232.2	229.9	220.3	225.7	0.854924	0.00412505
Peroxiredoxin-4	O08807	Prdx4	66.6	79.5	77.6	84.6	64.1	67.3	61.3	71	0.855336	0.0420118
BMP/retinoic acid-inducible neural-specific protein 2	Q6DFY8	Brinp2	98.1	119.4	113.5	118.8	95.6	94.1	93.8	101.6	0.856158	0.0222279
Heat shock protein beta-1	P14602	Hspb1	1345.4	1589.9	1299.6	1261.8	1201.4	1202.8	1135.9	1169.3	0.856769	0.0404504
Tetraspanin-2	Q922J6	Tspan2	1422.2	1234.5	1430.5	1440	1046.9	1163.7	1315.7	1211.6	0.857197	0.0378942
Guanylate-binding protein 2	Q9Z0E6	Gbp2	22.6	19.6	22	19.5	21.7	13.8	18.6	17.7	0.857826	0.152243
Galectin-1	P16045	Lgals1	1478.5	1712.6	1534.7	1513.5	1474.4	1356.8	1254.8	1271.9	0.858734	0.0227506
Methanethiol oxidase	P17563	Selenbp1	2354.6	2448.1	2341.7	2438.8	2087	2069.6	2005.3	2069.8	0.858972	5.09857e-05
Hemoglobin subunit beta-1	P02088	Hbb-b1	18504	22962.4	20541.2	20020.8	19590.3	17274.1	16329.9	17367.6	0.860213	0.0476726
2-iminobutanoate/2-iminopropanoate deaminase	P52760	Rida	4281.7	4201.2	3982.8	3677.3	3428.4	3416.1	3498.8	3550.6	0.860676	0.00671095
ADP-ribosylation factor 2	Q8BSL7	Arf2	117.4	114.6	122.2	129.6	103.4	105.1	109.6	98.8	0.86172	0.00560177
Calponin-2	Q08093	Cnn2	91.1	119.3	91.6	87.2	102.9	79.7	69.8	83	0.861768	0.233175
Sorting nexin-9	Q91VH2	Snx9	184	222.5	189.9	181.2	182.9	167	161.8	158.6	0.862011	0.0499512
Carboxymethylenebutenolidase homolog	Q8R1G2	Cmbl	1261.6	1287.4	1221.9	1297.1	1173.2	1094.2	1047.2	1071.9	0.865529	0.00179578
Lysosome-associated membrane glycoprotein 2	P17047	Lamp2	126.1	125.3	122.1	117	107	112.8	102.4	102.5	0.865851	0.00216076
Alpha-1-antitrypsin 1-1	P07758	Serpina1a	5908.6	7285.5	6075.1	6326.2	6240	5331.8	5170.8	5434	0.866429	0.0704671
Alpha-1-antitrypsin 1-2	P22599	Serpina1b	957.6	1120.8	1032.9	1015.8	998	849.4	837.9	894.6	0.867413	0.0331641
Multiple epidermal growth factor-like domains protein 8	P60882	Megf8	81.6	98.9	101.7	92.2	79.1	76.8	86.2	83	0.868323	0.0465252
Cysteine-rich protein 1	P63254	Crip1	1089.2	1299.4	1108.2	1073.7	1188	933	850.7	997.8	0.868505	0.142708
Centromere/kinetochore protein zw10 homolog	O54692	Zw10	9.7	12.9	18.6	14.4	15.3	10.6	11.1	11.3	0.868705	0.4271
Diamine acetyltransferase 2	Q6P8J2	Sat2	51.1	58.7	56.6	61.9	50.5	48.6	52.5	46.8	0.869032	0.0274513
Isocitrate dehydrogenase [NADP], mitochondrial	P54071	Idh2	11692.1	12732.1	11805.2	12676.5	10960.4	10241.3	10599.5	10704.5	0.869132	0.00225324
Protein S100-A1	P56565	S100a1	801.8	874.2	827.3	781.6	734.6	694.1	678.7	747.9	0.86922	0.00595798
Optineurin	Q8K3K8	Optn	128.3	145.4	137.2	144.9	121	112.2	122.9	127.3	0.869737	0.0122546
Sorbin and SH3 domain-containing protein 2	Q3UTJ2	Sorbs2	4086.3	4612.9	4192.7	4133.7	4061.5	3703.9	3428.2	3650.3	0.871858	0.0222766
Beta-2-syntrophin	Q61235	Sntb2	74.4	97.7	79.1	84	76.1	71.9	73.8	70.7	0.872613	0.0843584
Inositol 1,4,5-trisphosphate receptor type 3	P70227	Itpr3	315	344	311.7	305.8	282.4	254.2	305.7	271.6	0.87262	0.0252494
Murinoglobulin-1	P28665	Mug1	3506.5	4541	3638.9	3707	3651.3	3330.3	3198.7	3253.4	0.872692	0.103661
Hemoglobin subunit alpha	P01942	Hba	13056.8	16805.1	14640.5	14138.6	14227	12585.6	11932.3	12451.7	0.873051	0.0925418
Protein phosphatase 1 regulatory subunit 3F	Q9JIG4	Ppp1r3f	73.9	73.8	66.4	68.4	65.5	54.6	62.5	64.1	0.873274	0.0275876
Pre-mRNA-splicing factor SYF1	Q9DCD2	Xab2	21.7	15.2	16.3	24.2	18.6	20.2	15	13.8	0.873385	0.386351
Chloride intracellular channel protein 6	Q8BHB9	Clic6	1981.5	2676.9	2245.9	2875.3	2286.2	2140.8	1998	2131.6	0.874944	0.197773
CD82 antigen	P40237	Cd82	1571.6	1512.1	1593.3	1678.6	1256.2	1411.8	1488.8	1405.8	0.875228	0.0158973
Angiotensin-converting enzyme	P09470	Ace	1085.9	1378.1	1215	1301.7	1162.4	1055.5	1051.6	1090.5	0.875379	0.0618553
Hippocalcin-like protein 1	P62748	Hpcal1	1390.7	1393.8	1385	1536.9	1286.8	1278.1	1195.4	1238.4	0.875981	0.00582733
Prostaglandin-H2 D-isomerase	O09114	Ptgds	1188.1	1446.6	1208.9	1206.2	1169.9	1091.6	1074.7	1090.4	0.876589	0.0540066
Collagen alpha-1(XVIII) chain	P39061	Col18a1	277.4	313.8	278.5	285.1	269.8	244.5	254.1	244.2	0.876862	0.0143999
Cytosolic endo-beta-N-acetylglucosaminidase	Q8BX80	Engase	32	37.6	31.8	31	29	25	36.5	25.7	0.877644	0.230759
Caveolin-1	P49817	Cav1	1158.2	1355.8	1230.2	1121.1	1214.5	1042.4	993.1	1023	0.87826	0.0847471
Pyridine nucleotide-disulfide oxidoreductase domain-containing protein 2	Q3U4I7	Pyroxd2	39.9	47.1	47.3	42.7	43.4	35.1	36	41	0.878531	0.0918139
Retinol-binding protein 1	Q00915	Rbp1	600.6	737	632	714.3	638.5	592	562.8	565.1	0.878721	0.0701384
Hemoglobin subunit beta-2	P02089	Hbb-b2	8705.9	10671	9528.8	9226.5	9565.3	7989.9	7836.9	8139	0.879338	0.0928722
Multivesicular body subunit 12B	Q6KAU4	Mvb12b	142.6	129	142.8	150.7	135.8	117.2	133	111.5	0.880375	0.0637618
Epsin-3	Q91W69	Epn3	45.6	48.4	41.1	52.5	40.8	44.2	42.8	37.4	0.880597	0.0937597
Epoxide hydrolase 1	Q9D379	Ephx1	1468.1	1645.9	1427.6	1510.6	1333.2	1352.3	1356.2	1292.1	0.881299	0.0111154
Sorting nexin-25	Q3ZT31	Snx25	22.7	26.7	25.5	22.9	20.1	19.1	23.9	23.1	0.881391	0.104689
Aldo-keto reductase family 1 member B7	P21300	Akr1b7	130.2	138.3	125.5	125.5	122.1	112	115.3	108.6	0.881617	0.0102618
Anion exchange protein 2	P13808	Slc4a2	654.9	755.5	664.2	764.4	649.9	625.2	637	592.2	0.882106	0.0382209
Calcium/calmodulin-dependent protein kinase type 1	Q91YS8	Camk1	301.2	318.6	324.8	335.7	289.6	279.4	283.4	277.1	0.882215	0.00275339
Carboxylesterase 1C	P23953	Ces1c	2142.8	2417.9	2177.6	2150	2168	1886.4	1844.9	1942.8	0.882295	0.036385
Annexin A4	P97429	Anxa4	347.8	385.8	370	361.9	324.7	315.1	350.2	303.6	0.882702	0.0148017
Immunity-related GTPase family M protein 1	Q60766	Irgm1	81.3	93.7	78.3	79.9	78.1	63.6	72.4	80.2	0.883253	0.105987
Glutathione S-transferase Mu 1	P10649	Gstm1	19085.2	19628.2	19092.9	19286.2	17263.3	16925.1	16890.6	17027.1	0.883434	6.13394e-06
Parafibromin	Q8JZM7	Cdc73	96	93.7	91.6	94.2	88.8	76.5	81.3	85.7	0.884953	0.00875187
Myelin proteolipid protein	P60202	Plp1	20742.6	19297.6	20853.8	22331.2	16087.2	17944.1	20579.1	19069.4	0.885306	0.0794521
Phospholipid phosphatase 3	Q99JY8	Plpp3	1620.1	1524.6	1555.9	1471.2	1360.8	1296.2	1382.5	1424.5	0.885317	0.00502064
Apolipoprotein A-IV	P06728	Apoa4	482.5	515.5	500.4	495.3	481.8	415.4	420.6	447.9	0.88564	0.0142199
Tubulin alpha-8 chain	Q9JJZ2	Tuba8	1427.9	1367.8	1413.6	1341.3	1240.3	1214.8	1216.2	1247.3	0.886138	0.000343666
3-ketoacyl-CoA thiolase, mitochondrial	Q8BWT1	Acaa2	9214.4	9913.5	9283.7	10011.7	8842.6	8561.4	8281.3	8378.6	0.886543	0.00403719
F-BAR and double SH3 domains protein 2	Q3USJ8	Fchsd2	35.4	30.6	35.2	34.7	32.2	30.3	29.9	28.1	0.886681	0.0343654
Serotransferrin	Q921I1	Tf	15647.1	16792.7	16003.9	16247.1	15344.6	13765.3	13928.6	14331.1	0.886828	0.00525572
H-2 class I histocompatibility antigen, L-D alpha chain	P01897	H2-L	276.3	308.9	288.6	285.4	273	238.7	239.8	276.6	0.886905	0.0381446
Collagen alpha-2(VI) chain	Q02788	Col6a2	218.5	218.6	200.6	198.3	189.1	187.6	177.2	188	0.88744	0.00897027
Ganglioside GM2 activator	Q60648	Gm2a	198.8	201.9	204.3	190.4	177.7	179.5	164.5	184.7	0.888107	0.00550141
NGFI-A-binding protein 2	Q61127	Nab2	73.2	81.9	80	71.4	70.1	75.5	67.8	58.9	0.888418	0.0938431
Cap-specific mRNA (nucleoside-2'-O-)-methyltransferase 1	Q9DBC3	Cmtr1	147.1	157.9	154.3	145.9	148.3	131.8	128.1	129.7	0.888797	0.0220214
ATP-dependent translocase ABCB1	P21447	Abcb1a	1968.7	2182.8	1945.8	2000.9	1919.1	1788.4	1751	1745.2	0.889543	0.0161257
Protein S100-A6	P14069	S100a6	365.6	391	417.9	420.3	349	353.2	363.5	355	0.890833	0.0166339
Glycogen phosphorylase, muscle form	Q9WUB3	Pygm	8138.8	8306.1	7854.7	8049.1	7481.2	7044	7091.5	7203.9	0.890935	0.000632884
Aldose 1-epimerase	Q8K157	Galm	187.5	221.5	216.6	199.8	183.8	193.4	173.2	185.1	0.891083	0.0440377
Basement membrane-specific heparan sulfate proteoglycan core protein	Q05793	Hspg2	5748.8	6414	5752.1	5724.8	5637.5	5275.6	4947.2	5229.8	0.892148	0.0273704
Tyrosine-protein phosphatase non-receptor type 12	P35831	Ptpn12	22.5	20.8	20.4	19	19.9	18.6	18.5	16.8	0.892382	0.0597925
Glutathione S-transferase Mu 5	P48774	Gstm5	6496	6912.9	6787	6850.8	6090.9	5800.7	6161.2	6107.9	0.893296	0.00108012
Erythrocyte band 7 integral membrane protein	P54116	Stom	162	169.4	154.3	148.1	142.4	126.9	142.9	154.2	0.893657	0.0596023
Serine hydroxymethyltransferase, cytosolic	P50431	Shmt1	147.9	143.8	158.8	158.5	145.9	131.8	128.5	138.5	0.894417	0.0247913
Hematopoietic progenitor cell antigen CD34	Q64314	Cd34	628.5	631.8	606.5	614.5	576.1	534	544.8	564.6	0.894491	0.00110848
Formin-binding protein 1-like	Q8K012	Fnbp1l	258.6	307.3	227.6	229.7	227.8	230.3	230.5	227.4	0.895231	0.19937
Sulfide:quinone oxidoreductase, mitochondrial	Q9R112	Sqor	587.7	647	605.2	593.2	588.6	518.1	537.3	537	0.896387	0.0206738
Retinal dehydrogenase 1	P24549	Aldh1a1	2543.1	2965.4	2752.6	2679.3	2677.7	2420.4	2321.8	2387.9	0.896475	0.0529261
2,4-dienoyl-CoA reductase, mitochondrial	Q9CQ62	Decr1	1955.8	1991.7	1899.7	2009.8	1794.1	1756.2	1720.3	1774.2	0.896627	0.000414288
Transthyretin	P07309	Ttr	1262.7	1431.3	1258.4	1248.4	1294.9	1124.5	1010	1234.8	0.896824	0.1305
Alpha-aminoadipic semialdehyde dehydrogenase	Q9DBF1	Aldh7a1	6288.7	6449.4	6233.9	6386.8	5866.9	5578	5602.3	5707.9	0.897326	0.000206649
Iron-responsive element-binding protein 2	Q811J3	Ireb2	65.1	60.6	59.7	63.7	53.7	50.5	55.2	64.2	0.897631	0.0933773
Glycogen phosphorylase, liver form	Q9ET01	Pygl	197.6	217.3	208.8	214.9	180.2	195.5	185.4	191.9	0.897925	0.00846328
A-kinase anchor protein 8	Q9DBR0	Akap8	17.2	12.4	14.3	8.1	9.4	12.7	13	11.6	0.898077	0.546774
Probable glutamate--tRNA ligase, mitochondrial	Q9CXJ1	Ears2	282.4	345.8	289.5	289.6	278	261.6	283.3	261.9	0.898534	0.100143
Complement C1q subcomponent subunit B	P14106	C1qb	260.8	282.5	243.8	252.4	242.6	243.3	228.6	220	0.89899	0.0400188
Sphingomyelin phosphodiesterase	Q04519	Smpd1	154.3	158.6	183	171	168.9	147	148.3	135.6	0.899385	0.127434
Potassium voltage-gated channel subfamily C member 3	Q63959	Kcnc3	100.1	101.3	100.9	129.2	97.5	97.1	99.5	94.1	0.899652	0.183386
RUN domain-containing protein 3B	Q6PDC0	Rundc3b	87.3	95	102.1	81.4	83.3	78.5	87.2	80.1	0.899672	0.110511
Serine protease inhibitor A3K	P07759	Serpina3k	4551.4	6144.1	5230.6	5116.4	5244.1	4485.3	4452	4757	0.900007	0.212595
Collagen alpha-1(IV) chain	P02463	Col4a1	207	218.7	186.4	198.4	196.4	166.3	189.6	177.5	0.900432	0.0785926
Transmembrane emp24 domain-containing protein 4	Q8R1V4	Tmed4	345.4	352	356.3	352.4	328.3	300.6	307.9	331.2	0.901785	0.00462108
Transforming growth factor beta-1-induced transcript 1 protein	Q62219	Tgfb1i1	196.1	224.9	219.8	185.5	206.9	177.9	175.3	185.4	0.902215	0.138778
Pterin-4-alpha-carbinolamine dehydratase 2	Q9CZL5	Pcbd2	553.7	544.8	580.7	584.5	522.1	502.4	507.9	511.1	0.902726	0.00209452
Antithrombin-III	P32261	Serpinc1	224.1	263.4	228.2	261.2	247.2	218.1	213.6	203.3	0.903061	0.143723
Sorting nexin-32	Q80ZJ7	Snx32	222.7	210.6	206.2	203.3	196.9	183.1	186.7	194.4	0.903061	0.00882458
Amine oxidase [flavin-containing] B	Q8BW75	Maob	3408.5	3414	3468.4	3644.7	3164.6	3112.9	3132	3179.9	0.903398	0.00108178
Band 3 anion transport protein	P04919	Slc4a1	1407.6	1651.4	1489.4	1483.9	1448.1	1297.8	1273.4	1430.4	0.90342	0.0762433
Conserved oligomeric Golgi complex subunit 1	Q9Z160	Cog1	164.5	171.4	151.6	166.3	152.1	142	147.7	149	0.90364	0.0155573
SWI/SNF-related matrix-associated actin-dependent regulator of chromatin subfamily B member 1	Q9Z0H3	Smarcb1	46.9	41.4	35.7	37	39.2	38	32.2	36.1	0.903727	0.237992
Group XV phospholipase A2	Q8VEB4	Pla2g15	139.6	161.6	149.8	158.9	137.5	143.2	131	139.6	0.903919	0.039772
Muscleblind-like protein 1	Q9JKP5	Mbnl1	296.6	322.2	304.9	314.7	283.5	277.6	285	273.5	0.90407	0.00302739
Fibrinogen beta chain	Q8K0E8	Fgb	2348.2	2847.1	2508.4	2485.7	2401.1	2269.6	2222.5	2321.6	0.904352	0.0738625
DENN domain-containing protein 5A	Q6PAL8	Dennd5a	125.2	138.3	118.7	131.8	116.8	116.9	118.6	112.6	0.904475	0.0318644
Ras GTPase-activating-like protein IQGAP1	Q9JKF1	Iqgap1	320.5	348.6	343.1	364.1	336.3	310	293	305.6	0.904527	0.0427711
Copine-3	Q8BT60	Cpne3	331.9	394.1	306.3	313.9	318.6	273.2	321.2	305	0.904769	0.208827
Annexin A5	P48036	Anxa5	10655.6	10685.1	10433.9	10735.4	9621.3	9680.9	9438.5	9722.2	0.904797	3.23627e-05
EH domain-containing protein 2	Q8BH64	Ehd2	56.4	68	47.4	52.2	57.4	49	40.7	55.6	0.904911	0.39434
Ankyrin repeat domain-containing protein 17	Q99NH0	Ankrd17	326.8	368.7	309.5	339.9	300	292.6	318.4	306.2	0.905049	0.0576516
T-complex protein 11-like protein 1	Q8BTG3	Tcp11l1	191.9	219.6	195.4	210.4	185.2	174.2	195.8	184.5	0.905053	0.0481886
NADH-ubiquinone oxidoreductase chain 1	P03888	Mtnd1	587.8	643.5	617.4	665.9	582.6	530.7	576.3	586.5	0.905154	0.0308813
UV radiation resistance-associated protein	Q8K245	Uvrag	103.6	104.9	94.3	101.4	93.5	87	86	99.4	0.905245	0.0500767
Trans-L-3-hydroxyproline dehydratase	Q9CXA2	L3hypdh	103.9	118.4	115.3	111.9	104.1	96.1	96.1	110.8	0.905673	0.0661406
Protein C19orf12 homolog	Q8WUR0		131.6	113.3	112.8	130.2	109	104.5	130	98.5	0.905923	0.229281
Golgi to ER traffic protein 4 homolog	Q9D1H7	Get4	382.8	429.7	376.9	415.2	368.1	354.6	362	369.3	0.906145	0.0286449
NF-kappa-B inhibitor-interacting Ras-like protein 1	Q8CEC5	Nkiras1	282	266.8	255.4	236.1	244.5	224.7	245	228.6	0.906277	0.0690101
Protein-glutamine gamma-glutamyltransferase 2	P21981	Tgm2	1303.7	1449	1243.7	1291.1	1281.5	1162.8	1156.9	1196.1	0.907291	0.0593447
Serine/threonine-protein kinase 38	Q91VJ4	Stk38	55.4	55.8	59.5	50.8	50.6	48.9	46.2	55.3	0.907449	0.0975845
Tetratricopeptide repeat protein 38	A3KMP2	Ttc38	332.4	337.5	332.3	306.7	307.1	278.2	308.7	294.2	0.907785	0.0226996
Flavin reductase (NADPH)	Q923D2	Blvrb	1583.2	1676.3	1531.7	1549	1482.8	1406.8	1428.6	1437.7	0.907842	0.0066574
Muscular LMNA-interacting protein	Q5FW52	Mlip	113.3	116.5	110.1	110.7	106.4	92.9	100.3	109.6	0.908123	0.0398624
Probable cytosolic iron-sulfur protein assembly protein CIAO1	Q99KN2	Ciao1	178.4	187.7	192.5	182.5	166.7	170	165.9	170.8	0.908649	0.00215201
THO complex subunit 5 homolog	Q8BKT7	Thoc5	32.3	29.4	28.7	31.4	27.2	26.3	29.5	27.7	0.908867	0.0420566
Alpha-2-antiplasmin	Q61247	Serpinf2	311.9	337.3	329.2	314.7	324	279.1	286.8	286	0.909365	0.0476894
Deoxynucleoside triphosphate triphosphohydrolase SAMHD1	Q60710	Samhd1	107.7	107.8	121.5	113.2	109.9	105.9	95	98.6	0.909374	0.0727189
Glutathione S-transferase A4	P24472	Gsta4	3911.1	3978.2	3912.6	3956.8	3584.3	3543.5	3598.7	3605.3	0.909453	3.19856e-06
Haloacid dehalogenase-like hydrolase domain-containing protein 3	Q9CYW4	Hdhd3	1393	1427.9	1456.4	1468.5	1338.7	1262.6	1307.7	1316.8	0.909499	0.00137589
Serine/threonine-protein phosphatase 4 regulatory subunit 4	Q8C0Y0	Ppp4r4	457.9	495.1	469.2	443.5	448.7	438.3	414.3	395.6	0.909525	0.0402578
Major vault protein	Q9EQK5	Mvp	318.1	353.4	340.1	353.5	321.5	317.1	302	301.1	0.909604	0.0201282
Aldehyde dehydrogenase, mitochondrial	P47738	Aldh2	9871.6	10423.6	9856.2	10243.6	9617.1	9150.8	8891.5	9092.6	0.909816	0.0046815
Ribose-phosphate pyrophosphokinase 2	Q9CS42	Prps2	934.4	984.8	960.1	1038.2	909.7	859	887.9	907.9	0.909892	0.0125549
Ubiquitin carboxyl-terminal hydrolase 4	P35123	Usp4	539.1	596.8	546.3	533.4	555.2	477.8	498.9	484.4	0.910047	0.0718367
A-kinase anchor protein 8-like	Q9R0L7	Akap8l	32.1	32.6	34	33.9	30.3	30.8	31	28.6	0.910256	0.00621757
Protein ABHD11	Q8K4F5	Abhd11	466.8	474.9	454.8	467	415.6	415.2	438.4	427.4	0.910437	0.000933142
Ribulose-phosphate 3-epimerase	Q8VEE0	Rpe	550.1	639.4	569.3	558.8	563.1	523.1	514.6	510.1	0.910813	0.0720279
Centrosomal protein of 41 kDa	Q99NF3	Cep41	67	62.5	62.1	60.7	57.2	54.9	63.2	54.5	0.91082	0.059603
Transgelin-2	Q9WVA4	Tagln2	2129.7	2410.7	2130	2151.3	2122.3	1946.2	1949.1	2019.9	0.911106	0.0499399
Trans-1,2-dihydrobenzene-1,2-diol dehydrogenase	Q9DBB8	Dhdh	67.2	71.4	66	64.6	63.5	66.7	61.6	53.5	0.911218	0.108588
Plastin-1	Q3V0K9	Pls1	573.6	558.2	587.3	559.6	520.4	513.2	520.5	522.4	0.911265	0.000392584
Glutathione S-transferase theta-1	Q64471	Gstt1	440.2	464.6	460.6	447.3	419.5	400.3	406.5	426.3	0.911679	0.00279911
Anoctamin-10	Q8BH79	Ano10	206.6	210.7	205.5	203.3	175.3	192.2	192.3	193.6	0.911996	0.00774845
Cytoplasmic dynein 2 heavy chain 1	Q45VK7	Dync2h1	1190.8	1132.1	1095.7	1074.8	1026.6	975.1	1051.4	1045.4	0.912116	0.0183737
Carbonic anhydrase 2	P00920	Ca2	8272.3	8269.8	8591.3	8901	7611.9	7569.8	8036.9	7826	0.912154	0.00688098
NADH-ubiquinone oxidoreductase chain 2	P03893	Mtnd2	1152.2	1119.9	1027.5	1003.3	992.3	942.2	972.8	1018.5	0.912361	0.053109
Synaptoporin	Q8BGN8	Synpr	4568.2	3993.3	4309.3	3941	3904.8	3731.2	3929.6	3773.4	0.912395	0.0542953
Cytochrome c oxidase assembly protein COX18, mitochondrial	Q8VC74	Cox18	302.1	347.4	290.3	290.2	295.2	278.3	262.6	286.3	0.91252	0.128223
39S ribosomal protein L10, mitochondrial	Q3TBW2	Mrpl10	617	606.7	865.1	626.4	635.3	594.5	641.1	607.9	0.912935	0.385887
Solute carrier family 12 member 2	P55012	Slc12a2	7604	8540.2	8169.7	8970.4	7562.9	7596	7790.5	7440.8	0.913049	0.0516327
Acyl-coenzyme A thioesterase 2, mitochondrial	Q9QYR9	Acot2	500.9	505.5	469.9	458.6	451.4	449.1	432.2	434	0.91307	0.015406
Aquaporin-1	Q02013	Aqp1	233.5	287	247	287.4	246.4	230	245.4	241.5	0.913167	0.161217
F-box/LRR-repeat protein 20	Q9CZV8	Fbxl20	267.4	260.6	303.4	263.2	256.9	245.4	246.3	251	0.91321	0.0616663
Histone H2A.J	Q8R1M2	H2afj	357.3	392.3	396.4	381.9	336.3	374.5	348.7	336.1	0.913411	0.0391924
Protein phosphatase 1 regulatory subunit 1B	Q60829	Ppp1r1b	2301.2	2259.2	2212.9	2325.6	2088.2	2088.8	2052.9	2082.3	0.913539	0.00028765
Ephrin-B1	P52795	Efnb1	153.8	139.1	155.8	149.6	145.8	139	126.7	135.1	0.913589	0.0555404
THUMP domain-containing protein 1	Q99J36	Thumpd1	697	730.8	736.7	710.5	655.7	640.7	660.3	670	0.913635	0.0013352
28S ribosomal protein S11, mitochondrial	Q9DCA2	Mrps11	54.6	60.1	47.4	56.2	49.8	56.1	46.1	47.5	0.91388	0.222678
THUMP domain-containing protein 3	P97770	Thumpd3	187.1	197.6	174.3	178.5	177.4	158.5	172.5	165.6	0.913898	0.0527865
Signal transducer and activator of transcription 3	P42227	Stat3	707.5	771.6	660.4	656.6	638.5	621.6	653.5	641.8	0.913916	0.0721619
Isochorismatase domain-containing protein 2A	P85094	Isoc2a	821.5	806.8	815.1	794.6	801.5	707.5	721.6	730.5	0.914484	0.0189752
Peroxisomal membrane protein 11B	Q9Z210	Pex11b	298.8	367.4	289.8	305.6	304.5	276.8	275.9	296.7	0.914632	0.207036
Ceruloplasmin	Q61147	Cp	570.8	580.5	623.2	558.2	560.6	549	467.9	557.3	0.915163	0.107778
Mammalian ependymin-related protein 1	Q99M71	Epdr1	722.8	756.3	741.4	700.1	685.3	629.4	685.7	672.5	0.915189	0.0138112
Tropomodulin-3	Q9JHJ0	Tmod3	192.4	206.9	200	190.4	194	183.6	172.1	173.1	0.915284	0.0394478
Armadillo repeat-containing X-linked protein 3	Q8BHS6	Armcx3	205.2	201.5	210.3	204.9	188.5	182.3	186.9	194.8	0.915562	0.00152142
Trans-Golgi network integral membrane protein 2	Q62314	Tgoln2	162.7	179.8	158.3	163.5	136.5	154.2	153.1	164.6	0.915851	0.111037
Lipoma-preferred partner homolog	Q8BFW7	Lpp	397.8	416.5	411	369.7	393.2	368.9	346.1	352.6	0.915862	0.0640426
Hyaluronan and proteoglycan link protein 1	Q9QUP5	Hapln1	4359.1	4422.8	4349.9	4216.7	3984.3	3934.1	3950.4	4022.9	0.916027	0.000258783
Fibroblast growth factor 12	P61329	Fgf12	803.5	773.6	796.4	755	693.3	710.9	732.8	728.8	0.91603	0.00372721
Filamin-C	Q8VHX6	Flnc	235.9	220.3	224.6	227.8	201.3	206.3	206.8	218.4	0.916575	0.00825975
Cysteine sulfinic acid decarboxylase	Q9DBE0	Csad	658.4	677.3	635.6	621.3	601.8	605	585.3	585.2	0.916956	0.00708103
ADP/ATP translocase 4	Q3V132	Slc25a31	258.9	262.4	264.7	248.6	229.6	237	238.7	243.6	0.917166	0.00343682
Dual specificity phosphatase 28	Q8BTR5	Dusp28	46.7	41.4	43.3	50.9	45.5	36.8	47.7	37.2	0.91717	0.322049
Proteasome activator complex subunit 1	P97371	Psme1	1900.5	1935.9	1896.3	1944.6	1871.9	1741.7	1700.7	1728.6	0.917367	0.00736982
Replication protein A 14 kDa subunit	Q9CQ71	Rpa3	361.8	399.7	393.9	394	351.8	360.4	382	327.7	0.91771	0.0653111
Ras-related protein Rap-2b	P61226	Rap2b	5921.6	5975.7	5893.9	5812	5327.8	5280.5	5566	5490.8	0.917888	0.000670663
Fibrinogen alpha chain	E9PV24	Fga	3397	4137.3	3592	3634.5	3525.1	3489	3205.8	3329.3	0.917918	0.132773
Tyrosine-protein kinase Mer	Q60805	Mertk	234	231.2	207.7	199.4	202.9	195.2	208.5	194.1	0.917918	0.100316
Protein SCO1 homolog, mitochondrial	Q5SUC9	Sco1	337.9	322	309.3	304.2	298.2	277.8	288.7	304.4	0.918093	0.0334727
Tubulin alpha chain-like 3	Q3UX10	Tubal3	62.6	84.1	67.8	70.9	63.3	69.1	68	61.7	0.91836	0.281165
Nidogen-2	O88322	Nid2	1102.1	1224.4	1130.4	1142.4	1073.9	1093	1018.7	1039.1	0.918553	0.0237859
O-phosphoseryl-tRNA(Sec) selenium transferase	Q6P6M7	Sepsecs	493.6	604.4	526.3	537.4	503	464.9	491.2	527.4	0.918953	0.151279
Succinate dehydrogenase cytochrome b560 subunit, mitochondrial	Q9CZB0	Sdhc	478.4	517.5	506.4	480.8	462.6	424.2	453.1	482.9	0.919167	0.0418245
Histone H1.0	P10922	H1f0	1013.1	912.3	863.8	819.1	819.6	779	926.4	792.3	0.919353	0.221909
Fragile X mental retardation syndrome-related protein 1	Q61584	Fxr1	3412.5	3449.8	3350.6	3380	3135.6	3169.7	3120.3	3072.6	0.919465	8.62848e-05
Claudin-11	Q60771	Cldn11	5721.2	5640.7	6344.2	7062.4	4815.7	5910.5	6221.9	5826.4	0.919495	0.309544
E3 ubiquitin-protein ligase Praja-1	O55176	Pja1	188.1	193.9	185.7	180.1	172.6	176.1	165.5	173.8	0.920032	0.00646986
Thymidylate kinase	P97930	Dtymk	1284.9	1316.9	1268	1287.3	1192.4	1181.6	1203.8	1167.7	0.920188	0.000193652
Podocalyxin	Q9R0M4	Podxl	237.6	280.2	242.7	242.6	240.3	232.6	218.6	231.7	0.920347	0.115416
Histone H1.2	P15864	Hist1h1c	264.9	245.7	271.8	269.3	234.1	250	254.1	229.9	0.92051	0.0465808
DnaJ homolog subfamily B member 6	O54946	Dnajb6	316.7	338.2	343.2	311	309.7	273.2	313.7	308.5	0.920556	0.0789519
Short coiled-coil protein	Q78YZ6	Scoc	283.7	249	270.8	278	253.5	244.7	269.7	227.7	0.920573	0.11349
Zinc finger MYM-type protein 3	Q9JLM4	Zmym3	167.8	197.1	195.5	174.9	176.2	178.7	163.5	158.5	0.920577	0.149249
Neuropilin and tolloid-like protein 1	Q8R4I7	Neto1	107.4	104.7	108.1	123.7	97	101.9	105.4	104.4	0.920703	0.110037
Ferritin heavy chain	P09528	Fth1	1016.9	1058.5	1059.6	1051.8	944.5	902.2	1001.4	1006.9	0.920751	0.021439
Guanine nucleotide-binding protein G(I)/G(S)/G(O) subunit gamma-5	Q80SZ7	Gng5	968.4	940.2	981.3	949	882.5	874	898.8	879.9	0.920889	0.000394156
Syndecan-4	O35988	Sdc4	686.9	646.9	677.7	669.1	639.8	630.2	622.8	576.9	0.921324	0.0181013
Cordon-bleu protein-like 1	Q3UMF0	Cobll1	47.4	64.3	66.2	57.3	52.4	60	44	60.3	0.921344	0.451118
Complement C1q-like protein 2	Q8CFR0	C1ql2	45.2	48.8	37.6	47.9	44.7	45.7	35.6	39.4	0.921448	0.349065
NADH dehydrogenase (ubiquinone) complex I, assembly factor 6	A2AIL4	Ndufaf6	21.8	22.6	31.3	29	26.1	25.6	22.3	22.5	0.921681	0.452618
Enoyl-CoA delta isomerase 1, mitochondrial	P42125	Eci1	3080	3191.9	3145.5	3319.7	2996	2995.2	2852.3	2897.2	0.921772	0.00706672
Medium-chain specific acyl-CoA dehydrogenase, mitochondrial	P45952	Acadm	5087.9	5307.4	5174.6	5335.7	4946.1	4724.6	4738.6	4868.8	0.92215	0.00207857
Large neutral amino acids transporter small subunit 4	Q8CGA3	Slc43a2	161	197.1	179	184.3	158.8	174.1	161.4	171.1	0.922373	0.1446
Argininosuccinate synthase	P16460	Ass1	2060.5	2118.1	2047.9	2126	1926.6	1918.4	1890.1	1973.2	0.922873	0.000862079
GATOR complex protein DEPDC5	P61460	Depdc5	111.2	99.1	113	112.8	99.1	107.5	98.2	97.7	0.922953	0.0837108
Alpha-crystallin B chain	P23927	Cryab	1935.3	1963.2	2050.1	2162.6	1741.6	1872.4	1966.5	1906.5	0.923045	0.0668445
Ciliary neurotrophic factor receptor subunit alpha	O88507	Cntfr	1109.8	1205.2	1143.8	1205.9	1068.6	1053.8	1068.9	1114.6	0.923082	0.0164104
Protein kinase C and casein kinase substrate in neurons protein 2	Q9WVE8	Pacsin2	1964.9	2110.9	2017.2	2073.7	1873.9	1851.2	1854.3	1959.3	0.923102	0.0085398
Mitogen-activated protein kinase kinase kinase 4	O08648	Map3k4	202.6	201.5	174	188.4	181.6	170	180.5	175.5	0.923157	0.0871302
1-phosphatidylinositol 4,5-bisphosphate phosphodiesterase delta-1	Q8R3B1	Plcd1	1189.1	1267.3	1253	1243.7	1160.9	1111.9	1131.8	1168.8	0.923341	0.00456821
Protein ABHD14B	Q8VCR7	Abhd14b	734	744	751.9	767.5	711.5	703.3	687.8	666.4	0.923801	0.00337069
CD81 antigen	P35762	Cd81	1472.6	1465.6	1538.7	1548.4	1334.3	1341.5	1453.9	1436.9	0.923871	0.0234989
Sodium channel subunit beta-2	Q56A07	Scn2b	1976.8	1916.9	1838.1	1866.4	1738.2	1671.4	1842.7	1769	0.924074	0.0216456
Fumarylacetoacetase	P35505	Fah	2146.6	2129	2204.8	2273	2033.3	2023.5	2026.1	2006.1	0.924098	0.00238744
Exonuclease 3'-5' domain-containing protein 2	Q8VEG4	Exd2	69.8	59.6	69.3	65.1	65	63.5	59.1	56.2	0.924185	0.158893
Netrin receptor UNC5A	Q8K1S4	Unc5a	117.1	122.4	110.9	106.1	109.3	104.7	103.3	104.7	0.924425	0.0633514
Transmembrane protein 201	A2A8U2	Tmem201	138.2	140	139	135	135.4	120.4	129.4	125.3	0.924484	0.0209714
Small nuclear ribonucleoprotein E	P62305	Snrpe	80.4	72.1	74.9	66.8	75.6	56	75.6	64.8	0.924541	0.353819
Calcium-binding mitochondrial carrier protein Aralar2	Q9QXX4	Slc25a13	54.8	58.9	52.8	56.4	51.5	50.1	51.1	53.4	0.92463	0.0283773
Tryptophan 5-hydroxylase 2	Q8CGV2	Tph2	574.1	557.5	587.5	569.4	518.2	535.4	528.5	534	0.924667	0.0010709
Neural proliferation differentiation and control protein 1	Q64322	Npdc1	173.1	182.2	173.1	163.4	155.3	157.3	170.3	156.8	0.924689	0.0457487
OTU domain-containing protein 7B	B2RUR8	Otud7b	97.7	87	93.2	98.7	86.9	79.7	96.1	85.6	0.924854	0.152153
Septin-4	P28661	Septin4	4121.8	4091.6	4152.4	4398	3740.9	3858.8	3980.4	3930.5	0.925244	0.0115097
SWI/SNF-related matrix-associated actin-dependent regulator of chromatin subfamily D member 1	Q61466	Smarcd1	206.6	211.6	207.2	211.8	193.1	197.2	180.4	204	0.925346	0.0230585
Arginine--tRNA ligase, cytoplasmic	Q9D0I9	Rars	5028.6	5798.1	4726.4	4731	4825.9	4654.3	4636.8	4654.7	0.925439	0.190681
Phosphatidylinositol 3,4,5-trisphosphate 3-phosphatase and dual-specificity protein phosphatase PTEN	O08586	Pten	1828.7	1817.9	1820.8	1850.1	1711.7	1662.4	1680.3	1718.3	0.925548	0.000102517
Dolichyl-diphosphooligosaccharide--protein glycosyltransferase subunit DAD1	P61804	Dad1	284.3	312.8	307.1	302.5	280.5	270.9	270.3	295.3	0.925665	0.0384553
c-Myc-binding protein	Q9EQS3	Mycbp	213.3	225.9	226.8	233.6	207.7	207	202.1	216.3	0.926078	0.0180756
Ubiquitin-conjugating enzyme E2 J1	Q9JJZ4	Ube2j1	87.8	92.1	88.7	87.7	87.5	80.9	72.1	89.5	0.926186	0.156233
Vesicle-associated membrane protein 1	Q62442	Vamp1	1355.9	1336.1	1418.9	1353.1	1278	1229.6	1305.7	1247.9	0.926281	0.00654612
Histone H2A.V	Q3THW5	H2afv	1345.3	1479.5	1415.3	1456.1	1330.7	1316.1	1283.1	1347.2	0.926425	0.0178596
Reticulocalbin-1	Q05186	Rcn1	724.8	805.6	782.5	782.1	730.8	742.8	686.6	707.6	0.926591	0.0369623
Trafficking protein particle complex subunit 13	Q3TIR1	Trappc13	135.9	142.4	140	129.9	135.3	131.5	111.1	130.1	0.926669	0.148555
Vimentin	P20152	Vim	12618.1	15260.2	14091.9	13875.2	13471.8	12710	12588.6	12988.4	0.926823	0.12632
Signal peptidase complex catalytic subunit SEC11C	Q9D8V7	Sec11c	278.2	247.4	270.3	260.2	245.1	258	235.8	240	0.926901	0.0570902
HEAT repeat-containing protein 5B	Q8C547	Heatr5b	317.2	331.8	303.6	324.4	304	292.3	304.5	283.1	0.927095	0.0257775
Cathepsin B	P10605	Ctsb	1891.4	1977	1863.7	1927.7	1773.9	1765.4	1778.5	1783.6	0.9271	0.00134103
Histone H1.4	P43274	Hist1h1e	3359.4	3154.1	3015.1	3037.2	2755	3047.2	3065.2	2786.3	0.927414	0.0930001
Sorting nexin-13	Q6PHS6	Snx13	186.7	203.3	188.4	190.9	181.6	189.8	169.4	172.8	0.927597	0.0572204
Acyl-coenzyme A thioesterase 1	O55137	Acot1	4047	4138.5	4097.1	4228.2	3824.5	3849.1	3757.4	3885.9	0.92769	0.00071071
CAD protein	B2RQC6	Cad	263.7	262.4	268	264.7	258.8	238.8	235	249.7	0.927748	0.0134824
Histone H2B type 1-P	Q8CGP2	Hist1h2bp	105.6	100.8	107	107.7	96	96.3	94.1	104.3	0.927808	0.0324366
C-terminal-binding protein 2	P56546	Ctbp2	95.3	90.8	102	95.6	94	88.7	83.8	89.5	0.927808	0.0675573
Voltage-dependent L-type calcium channel subunit beta-3	P54285	Cacnb3	923.3	876.3	869.1	882.6	851.6	810.6	807.6	825.3	0.927857	0.00662224
TOX high mobility group box family member 4	Q8BU11	Tox4	69.9	80.5	86.1	78.2	69.3	75.9	77.8	69	0.927868	0.210688
Anaphase-promoting complex subunit 4	Q91W96	Anapc4	209.3	206.8	220.6	207.8	215.6	181.9	194.1	192.1	0.928005	0.0982349
Inter-alpha-trypsin inhibitor heavy chain H5	Q8BJD1	Itih5	133.9	117.6	130.3	121.6	129	119.3	117.6	101.5	0.928486	0.235954
E3 ubiquitin-protein ligase HECW2	Q6I6G8	Hecw2	196	199.2	192.7	212.3	190.7	187.8	186	178.6	0.928643	0.0291896
CCR4-NOT transcription complex subunit 10	Q8BH15	Cnot10	247.6	270	242.6	247.5	236.3	224	243.3	232.2	0.928649	0.0499223
m7GpppX diphosphatase	Q9DAR7	Dcps	2762.6	2905.4	2838	2865.2	2633.8	2664.6	2592.2	2669.3	0.928653	0.00114897
Adhesion G protein-coupled receptor B2	Q8CGM1	Adgrb2	184.8	183.6	192	189.1	169.8	173.5	175.5	177.3	0.928753	0.00183828
CAAX prenyl protease 1 homolog	Q80W54	Zmpste24	262.9	281.6	270.9	257.6	247.7	233.1	276.6	239.4	0.928984	0.132197
Homer protein homolog 1	Q9Z2Y3	Homer1	7039.2	6988.1	7019.7	6671.7	6582.6	6350.3	6412.7	6406	0.929033	0.00268094
SH3 domain-binding protein 1	P55194	Sh3bp1	81.6	91	89.6	91.3	89.4	70.9	85.4	82.8	0.929279	0.222326
NAD(P) transhydrogenase, mitochondrial	Q61941	Nnt	10818.4	11296.8	10850.8	10862.7	10385.8	10168.1	10149.6	10027.5	0.929323	0.00125995
Regulator of MON1-CCZ1 complex	Q8VC42	Rmc1	222.3	215.4	235.6	238.1	211.4	210.6	221.5	203.6	0.929449	0.049352
RNA-binding protein 42	Q91V81	Rbm42	93.3	90.1	101.7	100.1	92.6	82.4	97.9	85.2	0.929647	0.180649
Guanine nucleotide-binding protein G(I)/G(S)/G(O) subunit gamma-12	Q9DAS9	Gng12	3236.6	3323.8	3393.9	3480.5	3122	3016.8	3217.3	3133.6	0.929653	0.0117459
Myeloid leukemia factor 2	Q99KX1	Mlf2	1336	1311	1293.5	1325.4	1212.7	1257	1236.2	1189.6	0.929661	0.00171093
Cell division cycle protein 123 homolog	Q8CII2	Cdc123	15.1	11.2	13.9	9.6	10.4	8.3	16.1	11.5	0.929719	0.68718
Catechol O-methyltransferase domain-containing protein 1	Q8BIG7	Comtd1	1602	1592	1565.1	1629	1505.5	1440.9	1490.6	1502.3	0.929744	0.00135884
Very-long-chain (3R)-3-hydroxyacyl-CoA dehydratase 3	Q8K2C9	Hacd3	2923.1	3395.3	3052.3	3307.5	3150.4	2890.2	2854.6	2892.5	0.929761	0.135861
60S ribosomal protein L35a	O55142	Rpl35a	2737.3	3114.1	2598	2997.2	2919.3	2572	2525.8	2625.6	0.92977	0.222088
Gap junction gamma-3 protein	Q921C1	Gjc3	430.6	441.1	474.4	475.3	394.2	426.8	453	420	0.930054	0.104358
EH domain-containing protein 4	Q9EQP2	Ehd4	697.5	726.3	696.6	704.9	678.8	640.6	649.2	660.6	0.930591	0.00387834
E3 ubiquitin-protein ligase RBX1	P62878	Rbx1	924.3	987.5	929.9	963.6	910.5	847.1	877.3	907	0.930781	0.0200692
Solute carrier family 25 member 51	Q5HZI9	Slc25a51	502.6	478.2	466.1	507	465.2	421.8	484.7	447.1	0.930856	0.0878186
WD repeat-containing protein 6	Q99ME2	Wdr6	384.2	393.6	390.9	399.3	389.8	350.8	356.3	362.8	0.930931	0.0258201
Protein Njmu-R1	Q9CYI0		90.8	89.3	89.7	91.4	88.5	80.9	77.7	89.2	0.931063	0.073767
Fructosamine-3-kinase	Q9ER35	Fn3k	1700.5	1731.5	1660.6	1721.4	1623.2	1562	1595.5	1564.1	0.931142	0.00153281
Probable proline--tRNA ligase, mitochondrial	Q8CFI5	Pars2	383.3	426.2	409.1	387.5	378.5	369.4	363	384.7	0.9312	0.0468892
Centrosomal protein of 112 kDa	Q5PR68	Cep112	118.9	131	111.2	116.4	111.2	104.1	111	118.4	0.931309	0.159677
Annexin A3	O35639	Anxa3	879.8	937.2	915.1	874.2	887.9	839.6	803.5	828	0.931426	0.0371505
NPC intracellular cholesterol transporter 1	O35604	Npc1	312.3	329.6	309	300.5	304.9	284.6	294.8	281.3	0.931437	0.0383758
Myosin light chain kinase, smooth muscle	Q6PDN3	Mylk	514.9	543.1	535.3	529.5	538.2	473.4	483.9	482.2	0.931647	0.0630248
Serine/threonine-protein kinase TBK1	Q9WUN2	Tbk1	244.9	266.5	252.8	255.8	248.7	246	211.7	243.9	0.931667	0.124575
Leukotriene A-4 hydrolase	P24527	Lta4h	6074.6	6278.7	6060.6	6201	5894.9	5579.1	5711	5748.6	0.931696	0.00235317
Rapamycin-insensitive companion of mTOR	Q6QI06	Rictor	512.7	567.8	523.8	535.3	528.5	490.9	485.8	488.3	0.931716	0.0577796
Sorbitol dehydrogenase	Q64442	Sord	1774.3	1819.3	1813.3	1780.9	1727.2	1600.2	1651.3	1718.5	0.931745	0.0086643
Nuclear cap-binding protein subunit 2	Q9CQ49	Ncbp2	289.5	304	267.4	277.1	278	257.8	258.9	265.7	0.93181	0.0789729
Essential MCU regulator, mitochondrial	Q9DB10	Smdt1	425.9	475.9	450.4	411.6	426.6	385.3	422.3	409.9	0.932135	0.127188
Choline transporter-like protein 2	Q8BY89	Slc44a2	813.8	715.1	778.4	734.4	720.2	697.3	717.3	700.7	0.932209	0.0655162
Carboxypeptidase Q	Q9WVJ3	Cpq	144.1	155.1	125.3	135.5	139.7	134.3	123.6	124.8	0.932857	0.252043
Glycosaminoglycan xylosylkinase	Q8VCS3	Fam20b	251.9	233.9	252.6	225.3	227.1	225.9	223.5	222.5	0.932863	0.0562874
Phosphatidate cytidylyltransferase 2	Q99L43	Cds2	2109	2347.1	2232.6	2194.6	2003.1	2067.6	2045.5	2171.1	0.932908	0.0501317
Gamma-aminobutyric acid receptor subunit alpha-3	P26049	Gabra3	174.6	166.1	177.4	163.1	185	135.3	166.3	148.9	0.932913	0.350867
Inactive dipeptidyl peptidase 10	Q6NXK7	Dpp10	3471.7	3355.3	3364.3	3529.3	3303.1	3201.1	3096.6	3200.6	0.933006	0.00848912
Serine/threonine-protein kinase LMTK2	Q3TYD6	Lmtk2	589.5	756.2	555.7	578.9	575.1	604.6	564.9	569.9	0.933153	0.409651
C2 calcium-dependent domain-containing protein 4C	Q5HZI2	C2cd4cC2CD4 family	575.2	563	599.8	600.7	532.5	570.7	535.2	544	0.933168	0.0222413
Argininosuccinate lyase	Q91YI0	Asl	1921.3	1891.7	1841.3	1904.5	1821.5	1713.9	1742.7	1776.3	0.93327	0.00471104
Angiomotin	Q8VHG2	Amot	11.4	10.1	11.8	13.4	10	9.8	10.6	13.2	0.933619	0.483801
D-glutamate cyclase, mitochondrial	Q8BH86	Dglucy	493.2	493.1	475.9	468.8	457.7	446.2	456.4	442.9	0.933817	0.00435925
Vinculin	Q64727	Vcl	10008.1	10620.5	9516.9	9331.2	9630.9	9081	8891.8	9260.4	0.933819	0.0939198
Plectin	Q9QXS1	Plec	58812.6	59562.1	59013.1	59481.1	55426.4	56072.1	55134.2	54598	0.93398	3.42138e-05
Citramalyl-CoA lyase, mitochondrial	Q8R4N0	Clybl	6564.1	6686.1	6650.5	6674.7	6265.6	6148.1	6170.6	6241.3	0.934157	3.13938e-05
Myotubularin-related protein 2	Q9Z2D1	Mtmr2	913.7	896.8	910.9	860.4	828.5	826.9	852.5	838.8	0.934363	0.00497299
Rab9 effector protein with kelch motifs	Q8VCH5	Rabepk	335.7	313.3	376.3	370.5	343.1	333.8	324.3	303.4	0.934661	0.231793
Kinase suppressor of Ras 2	Q3UVC0	Ksr2	87	93.2	85.7	99	89.1	86.4	84	81.6	0.934777	0.136398
Delta(3,5)-Delta(2,4)-dienoyl-CoA isomerase, mitochondrial	O35459	Ech1	1588.8	1684.9	1620.1	1663.7	1548.1	1525.1	1522.2	1534.5	0.934792	0.00306284
Small nuclear ribonucleoprotein Sm D1	P62315	Snrpd1	133	126.6	125.4	119.7	125.2	121.8	115.1	109.7	0.934813	0.111115
Islet cell autoantigen 1	P97411	Ica1	1953	1635.4	1772.4	1521.7	1645.3	1589.9	1531.6	1667.5	0.934878	0.295224
ER membrane protein complex subunit 10	Q3TAS6	Emc10	433.8	457.6	438.7	422.7	399.5	412.8	409.2	417.3	0.934961	0.0132478
Peroxisomal acyl-coenzyme A oxidase 3	Q9EPL9	Acox3	40.1	48.8	48	47.7	47.2	47.1	33.8	44.5	0.934995	0.456675
Palmitoyl-protein thioesterase 1	O88531	Ppt1	3508.7	3540.6	3516.1	3567.7	3332.3	3336	3237.5	3311.5	0.935202	0.000133068
G-protein coupled receptor 37-like 1	Q99JG2	Gpr37l1	286.6	313.8	276.1	294.2	280.7	245.8	282.5	286	0.935338	0.174908
BAG family molecular chaperone regulator 3	Q9JLV1	Bag3	92	93.4	91.4	95.5	83	83.7	89.8	91.8	0.935536	0.044911
Synaptotagmin-12	Q920N7	Syt12	877.9	867.1	1035.1	867.6	906.7	809.1	872	824.8	0.935548	0.255752
Tripeptidyl-peptidase 1	O89023	Tpp1	1184.4	1263.9	1130.9	1245.1	1178.1	1110.8	1111.8	1114.1	0.935846	0.0658417
Complement C3	P01027	C3	2020.3	2147.1	2136.7	2041.8	2082.2	1900.2	1909.7	1919.4	0.935969	0.0483414
GPI-anchor transamidase	Q9CXY9	Pigk	409	439	442.9	439.6	409.6	396.4	423.1	390.6	0.935972	0.0417602
5'-nucleotidase domain-containing protein 3	Q3UHB1	Nt5dc3	4948.7	4787.3	4813.3	4536.8	4573.7	4230.9	4495.3	4566.7	0.936105	0.0412443
Polyadenylate-binding protein-interacting protein 1	Q8VE62	Paip1	1634.8	1691.3	1605.9	1612.9	1526.7	1501.7	1557.7	1540.9	0.936149	0.00368421
[truncated: 4,452 more rows]

## Sheet: Sheet4
Description	Accession	Gene	WT-1	WT-2	WT-3	WT-4	WT + CQ-1	WT + CQ-2	WT + CQ-3	WT + CQ-4	WT+CQ/WT ratio	p value
[truncated: 4,812 more rows]

## Sheet: Sheet5
Description	Accession	Gene	FXS-1	FXS-2	FXS-3	FXS-4	FXS+Ril-1	FXS+Ril-2	FXS+Ril-3	FXS+Ril-4	FXS + Ril/FXS ratio	p value
[truncated: 4,812 more rows]
