# Supplementary material for: Autophagy controls the hippocampal postsynaptic organization and affects cognition in a mouse model of Fragile X syndrome
Source: Research Square preprint supplement (doi:10.21203/rs.3.rs-4415392/v1), 2025-08-27
Supplement: Supplementary file 6 [file 95b37aa82394fbd5e95a3073.xlsx]

## Sheet: sheet1
GO term ID	user interface reference code	GO domain	GO term name	GO term name - hierarchical structure	GO parent term ID	GSEA p-value	GSEA 'gene cluster' FDR corrected p-value	GSEA count foreground/input	GSEA count background	genes - hgnc_id	genes - hgnc_symbol	genes - your genelist input	genes - without hierarchical rollup - hgnc_symbol
GO:0045202		CC	synapse	synapse		7.32861e-26	9.52719e-25	86	1478	HGNC:12666;HGNC:8554;HGNC:10377;HGNC:10421;HGNC:10360;HGNC:10386;HGNC:10409;HGNC:10402;HGNC:10413;HGNC:10298;HGNC:10299;HGNC:10369;HGNC:10397;HGNC:5036;HGNC:12005;HGNC:17780;HGNC:21100;HGNC:9315;HGNC:678;HGNC:3015;HGNC:12852;HGNC:10316;HGNC:10317;HGNC:10385;HGNC:10387;HGNC:10416;HGNC:3266;HGNC:3299;HGNC:6159;HGNC:17062;HGNC:5030;HGNC:5031;HGNC:5037;HGNC:5039;HGNC:5045;HGNC:25127;HGNC:11280;HGNC:2…	VCP;PABPC1;RPLP2;RPS3A;RPL5;RPS13;RPS21;RPS19;RPS25;RPL10;RPL10A;RPL9;RPS17;HNRNPD;TPD52;ACTBL2;QKI;PPP3CB;ARHGDIA;DPYSL3;YWHAG;RPL23;RPL23A;RPS12;RPS14;RPS27;EIF2S2;EIF5;EIF6;HABP4;HNRNPA0;HNRNPA1;HNRNPDL;HNRNPF;HNRNPL;HNRNPLL;SQSTM1;DPYSL5;SARM1;GIPC1;HSPA8;TNIK;PTN;SCRN1;GAP43;NTRK2;CRMP1;SEPTIN2;SUMO2;MARCKS;MARCKSL1;GDI1;ERC1;SNAP47;PI4K2A;ATP2B2;SNAP29;RAB3C;SGTA;NCAM1;L1CAM;CXADR;TNC;CAMK4…	VCP;PABPC1;RPLP2;RPS3A;RPL5;RPS13;RPS21;RPS19;RPS25;RPL10;RPL10A;RPL9;RPS17;HNRNPD;TPD52;ACTBL2;QKI;PPP3CB;ARHGDIA;DPYSL3;YWHAG;RPL23;RPL23A;RPS12;RPS14;RPS27;EIF2S2;EIF5;EIF6;HABP4;HNRNPA0;HNRNPA1;HNRNPDL;HNRNPF;HNRNPL;HNRNPLL;SQSTM1;DPYSL5;SARM1;GIPC1;HSPA8;TNIK;PTN;SCRN1;GAP43;NTRK2;CRMP1;SEPTIN2;SUMO2;MARCKS;MARCKSL1;GDI1;ERC1;SNAP47;PI4K2A;ATP2B2;SNAP29;RAB3C;SGTA;NCAM1;L1CAM;CXADR;TNC;CAMK4…	VCP;PABPC1;RPLP2;RPS3A;RPL5;RPS13;RPS21;RPS19;RPS25;RPL10;RPL10A;RPL9;RPS17;HNRNPD;TPD52;ACTBL2;QKI;PPP3CB;ARHGDIA;DPYSL3;YWHAG;RPL23;RPL23A;RPS12;RPS14;RPS27;EIF2S2;EIF5;EIF6;HABP4;HNRNPA0;HNRNPA1;HNRNPDL;HNRNPF;HNRNPL;HNRNPLL;SQSTM1;DPYSL5
GO:0097060	A1	CC	synaptic membrane	├─ synaptic membrane	GO:0045202			1	26	HGNC:17074	SARM1	SARM1
GO:0099243	A2	CC	extrinsic component of synaptic membrane	│ ├─ extrinsic component of synaptic membrane	GO:0097060			1	2	HGNC:17074	SARM1	SARM1	SARM1
GO:0099699	A3	CC	integral component of synaptic membrane	│ └─ integral component of synaptic membrane	GO:0097060			0	19
GO:0098793	B1	CC	presynapse	├─ presynapse	GO:0045202	4.39038e-09	1.1415e-08	35	692	HGNC:10416;HGNC:1226;HGNC:5241;HGNC:30765;HGNC:9630;HGNC:12852;HGNC:22192;HGNC:4140;HGNC:8032;HGNC:2365;HGNC:7729;HGNC:11125;HGNC:6759;HGNC:7142;HGNC:4226;HGNC:17072;HGNC:30669;HGNC:30031;HGNC:815;HGNC:11133;HGNC:30269;HGNC:10819;HGNC:7656;HGNC:6470;HGNC:2559;HGNC:10369;HGNC:10298;HGNC:10299;HGNC:10316;HGNC:10317;HGNC:10360;HGNC:10377;HGNC:10385;HGNC:10387;HGNC:10386	RPS27;GIPC1;HSPA8;TNIK;PTN;YWHAG;SCRN1;GAP43;NTRK2;CRMP1;SEPTIN2;SUMO2;MARCKS;MARCKSL1;GDI1;ERC1;SNAP47;PI4K2A;ATP2B2;SNAP29;RAB3C;SGTA;NCAM1;L1CAM;CXADR;RPL9;RPL10;RPL10A;RPL23;RPL23A;RPL5;RPLP2;RPS12;RPS14;RPS13	RPS27;GIPC1;HSPA8;TNIK;PTN;YWHAG;SCRN1;GAP43;NTRK2;CRMP1;SEPTIN2;SUMO2;MARCKS;MARCKSL1;GDI1;ERC1;SNAP47;PI4K2A;ATP2B2;SNAP29;RAB3C;SGTA;NCAM1;L1CAM;CXADR;RPL9;RPL10;RPL10A;RPL23;RPL23A;RPL5;RPLP2;RPS12;RPS14;RPS13	RPS27;GIPC1;HSPA8;TNIK;PTN;YWHAG;SCRN1;GAP43;NTRK2;CRMP1;SEPTIN2;SUMO2
GO:0099523	B2	CC	presynaptic cytosol	│ ├─ presynaptic cytosol	GO:0098793	0.00218267	0.00354683	5	53	HGNC:6759;HGNC:7142;HGNC:4226;HGNC:17072;HGNC:11125	MARCKS;MARCKSL1;GDI1;ERC1;SUMO2	MARCKS;MARCKSL1;GDI1;ERC1;SUMO2	MARCKS;MARCKSL1;GDI1;ERC1;SUMO2
GO:0099569	B3	CC	presynaptic cytoskeleton	│ ├─ presynaptic cytoskeleton	GO:0098793			0	5
GO:0099182	B12	CC	presynaptic intermediate filament cytoskeleton	│ │ ├─ presynaptic intermediate filament cytoskeleton	GO:0099569			0	1
GO:0099143	B13	CC	presynaptic actin cytoskeleton	│ │ └─ presynaptic actin cytoskeleton	GO:0099569			0	2
GO:0048786	B4	CC	presynaptic active zone	│ ├─ presynaptic active zone	GO:0098793	0.103716	0.122574	4	109	HGNC:30669;HGNC:30031;HGNC:17072;HGNC:815	SNAP47;PI4K2A;ERC1;ATP2B2	SNAP47;PI4K2A;ERC1;ATP2B2	SNAP47;PI4K2A
GO:0098831	B14	CC	presynaptic active zone cytoplasmic component	│ │ ├─ presynaptic active zone cytoplasmic component	GO:0048786			1	21	HGNC:17072	ERC1	ERC1	ERC1
GO:0048787	B15	CC	presynaptic active zone membrane	│ │ └─ presynaptic active zone membrane	GO:0048786			1	70	HGNC:815	ATP2B2	ATP2B2
GO:0099029	B27	CC	anchored component of presynaptic active zone membrane	│ │ ├─ anchored component of presynaptic active zone membrane	GO:0048787			0	8
GO:0098891	B28	CC	extrinsic component of presynaptic active zone membrane	│ │ ├─ extrinsic component of presynaptic active zone membrane	GO:0048787			0	3
GO:0099059	B29	CC	integral component of presynaptic active zone membrane	│ │ └─ integral component of presynaptic active zone membrane	GO:0048787			1	52	HGNC:815	ATP2B2	ATP2B2	ATP2B2
GO:0098833	B5	CC	presynaptic endocytic zone	│ ├─ presynaptic endocytic zone	GO:0098793			0	21
GO:0098835	B16	CC	presynaptic endocytic zone membrane	│ │ └─ presynaptic endocytic zone membrane	GO:0098833			0	17
GO:0098894	B30	CC	extrinsic component of presynaptic endocytic zone membrane	│ │ └─ extrinsic component of presynaptic endocytic zone membrane	GO:0098835			0	11
GO:0098830	B6	CC	presynaptic endosome	│ ├─ presynaptic endosome	GO:0098793			0	13
GO:0098954	B17	CC	presynaptic endosome membrane	│ │ └─ presynaptic endosome membrane	GO:0098830			0	2
GO:0099067	B31	CC	integral component of presynaptic endosome membrane	│ │ └─ integral component of presynaptic endosome membrane	GO:0098954			0	2
GO:0008021	B7	CC	synaptic vesicle	│ ├─ synaptic vesicle	GO:0098793	0.235945	0.235945	4	153	HGNC:7142;HGNC:11133;HGNC:30269;HGNC:10819	MARCKSL1;SNAP29;RAB3C;SGTA	MARCKSL1;SNAP29;RAB3C;SGTA	MARCKSL1;SNAP29
GO:0034592	B18	CC	synaptic vesicle lumen	│ │ ├─ synaptic vesicle lumen	GO:0008021			0	1
GO:0030672	B19	CC	synaptic vesicle membrane	│ │ └─ synaptic vesicle membrane	GO:0008021			3	122	HGNC:30269;HGNC:10819;HGNC:11133	RAB3C;SGTA;SNAP29	RAB3C;SGTA;SNAP29
GO:0098993	B32	CC	anchored component of synaptic vesicle membrane	│ │ ├─ anchored component of synaptic vesicle membrane	GO:0030672			1	20	HGNC:30269	RAB3C	RAB3C	RAB3C
GO:0098850	B33	CC	extrinsic component of synaptic vesicle membrane	│ │ ├─ extrinsic component of synaptic vesicle membrane	GO:0030672			2	26	HGNC:10819;HGNC:11133	SGTA;SNAP29	SGTA;SNAP29	SGTA;SNAP29
GO:0030285	B34	CC	integral component of synaptic vesicle membrane	│ │ └─ integral component of synaptic vesicle membrane	GO:0030672			0	57
GO:0098992	B8	CC	neuronal dense core vesicle	│ ├─ neuronal dense core vesicle	GO:0098793			0	40
GO:0099013	B20	CC	neuronal dense core vesicle lumen	│ │ ├─ neuronal dense core vesicle lumen	GO:0098992			0	8
GO:0099012	B21	CC	neuronal dense core vesicle membrane	│ │ └─ neuronal dense core vesicle membrane	GO:0098992			0	6
GO:0098674	B35	CC	extrinsic component of neuronal dense core vesicle membrane	│ │ ├─ extrinsic component of neuronal dense core vesicle membrane	GO:0099012			0	2
GO:0099066	B36	CC	integral component of neuronal dense core vesicle membrane	│ │ └─ integral component of neuronal dense core vesicle membrane	GO:0099012			0	4
GO:0042734	B9	CC	presynaptic membrane	│ ├─ presynaptic membrane	GO:0098793	0.0493293	0.0641281	6	161	HGNC:815;HGNC:6759;HGNC:7142;HGNC:7656;HGNC:6470;HGNC:2559	ATP2B2;MARCKS;MARCKSL1;NCAM1;L1CAM;CXADR	ATP2B2;MARCKS;MARCKSL1;NCAM1;L1CAM;CXADR	ATP2B2
GO:0099026	B22	CC	anchored component of presynaptic membrane	│ │ ├─ anchored component of presynaptic membrane	GO:0042734			2	9	HGNC:6759;HGNC:7142	MARCKS;MARCKSL1	MARCKS;MARCKSL1	MARCKS;MARCKSL1
GO:0098888	B23	CC	extrinsic component of presynaptic membrane	│ │ ├─ extrinsic component of presynaptic membrane	GO:0042734			0	8
GO:0099056	B24	CC	integral component of presynaptic membrane	│ │ └─ integral component of presynaptic membrane	GO:0042734			3	130	HGNC:7656;HGNC:6470;HGNC:2559	NCAM1;L1CAM;CXADR	NCAM1;L1CAM;CXADR	NCAM1;L1CAM;CXADR
SYNGO:presyn_ribosome	B10	CC	presynaptic ribosome	│ ├─ presynaptic ribosome	GO:0098793	3.69553e-09	1.1415e-08	11	52	HGNC:10369;HGNC:10298;HGNC:10299;HGNC:10316;HGNC:10317;HGNC:10360;HGNC:10377;HGNC:10385;HGNC:10387;HGNC:10386;HGNC:10416	RPL9;RPL10;RPL10A;RPL23;RPL23A;RPL5;RPLP2;RPS12;RPS14;RPS13;RPS27	RPL9;RPL10;RPL10A;RPL23;RPL23A;RPL5;RPLP2;RPS12;RPS14;RPS13;RPS27	RPL9;RPL10;RPL10A;RPL23;RPL23A;RPL5;RPLP2;RPS12;RPS14;RPS13;RPS27
SYNGO:presyn_er	B11	CC	presynaptic ER	│ └─ presynaptic ER	GO:0098793			0	4
SYNGO:presyn_er_membrane	B25	CC	presynaptic ER membrane	│ ├─ presynaptic ER membrane	SYNGO:presyn_er			0	1
SYNGO:presyn_er_membrane_integral	B37	CC	integral component of presynaptic ER membrane	│ │ └─ integral component of presynaptic ER membrane	SYNGO:presyn_er_membrane			0	1
SYNGO:presyn_ser	B26	CC	presynaptic SER	│ └─ presynaptic SER	SYNGO:presyn_er			0	2
SYNGO:presyn_ser_membrane	B38	CC	presynaptic SER membrane	│ └─ presynaptic SER membrane	SYNGO:presyn_ser			0	2
SYNGO:presyn_ser_membrane_integral	B39	CC	integral component of presynaptic SER membrane	│ └─ integral component of presynaptic SER membrane	SYNGO:presyn_ser_membrane			0	1
GO:0043083	C1	CC	synaptic cleft	├─ synaptic cleft	GO:0045202			1	22	HGNC:5318	TNC	TNC
GO:0098965	C2	CC	extracellular matrix of synaptic cleft	│ └─ extracellular matrix of synaptic cleft	GO:0043083			1	5	HGNC:5318	TNC	TNC	TNC
GO:0098794	D1	CC	postsynapse	├─ postsynapse	GO:0045202	1.76793e-14	1.14915e-13	51	911	HGNC:1464;HGNC:1226;HGNC:21747;HGNC:3285;HGNC:169;HGNC:3296;HGNC:5044;HGNC:9630;HGNC:8032;HGNC:5241;HGNC:6839;HGNC:2365;HGNC:2700;HGNC:7732;HGNC:6320;HGNC:11125;HGNC:8988;HGNC:418;HGNC:2695;HGNC:3560;HGNC:6759;HGNC:10360;HGNC:30669;HGNC:4617;HGNC:10386;HGNC:10416;HGNC:10413;HGNC:10402;HGNC:10387;HGNC:10316;HGNC:10299;HGNC:5042;HGNC:5036;HGNC:1504;HGNC:19751;HGNC:16918;HGNC:30765;HGNC:1874;HGNC:29…	CAMK4;GIPC1;CPEB4;EIF4B;ACTR2;EIF4G1;HNRNPK;PTN;NTRK2;HSPA8;MAP2;CRMP1;DCLK1;NEDD8;KIF3B;SUMO2;PIN1;ALDOC;DBN1;FABP5;MARCKS;RPL5;SNAP47;GSK3B;RPS13;RPS27;RPS25;RPS19;RPS14;RPL23;RPL10A;HNRNPH2;HNRNPD;CASP3;SRGAP2;SYNCRIP;TNIK;CFL1;DLG4;ATP2B2;SLC16A7;NRCAM;NCAM1;RPL10;RPL23A;RPLP2;RPS12;RPS17;RPS21;RPS3A;RPL9	CAMK4;GIPC1;CPEB4;EIF4B;ACTR2;EIF4G1;HNRNPK;PTN;NTRK2;HSPA8;MAP2;CRMP1;DCLK1;NEDD8;KIF3B;SUMO2;PIN1;ALDOC;DBN1;FABP5;MARCKS;RPL5;SNAP47;GSK3B;RPS13;RPS27;RPS25;RPS19;RPS14;RPL23;RPL10A;HNRNPH2;HNRNPD;CASP3;SRGAP2;SYNCRIP;TNIK;CFL1;DLG4;ATP2B2;SLC16A7;NRCAM;NCAM1;RPL10;RPL23A;RPLP2;RPS12;RPS17;RPS21;RPS3A;RPL9	CAMK4;GIPC1;CPEB4;EIF4B;ACTR2;EIF4G1;HNRNPK;PTN;NTRK2;HSPA8;MAP2;CRMP1;DCLK1;NEDD8;KIF3B;SUMO2
GO:0099524	D2	CC	postsynaptic cytosol	│ ├─ postsynaptic cytosol	GO:0098794	0.0018666	0.00346654	5	51	HGNC:8988;HGNC:418;HGNC:2695;HGNC:3560;HGNC:11125	PIN1;ALDOC;DBN1;FABP5;SUMO2	PIN1;ALDOC;DBN1;FABP5;SUMO2	PIN1;ALDOC;DBN1;FABP5;SUMO2
GO:0099571	D3	CC	postsynaptic cytoskeleton	│ ├─ postsynaptic cytoskeleton	GO:0098794			2	26	HGNC:6759;HGNC:2695	MARCKS;DBN1	MARCKS;DBN1	MARCKS
GO:0099160	D12	CC	postsynaptic intermediate filament cytoskeleton	│ │ ├─ postsynaptic intermediate filament cytoskeleton	GO:0099571			0	3
GO:0098871	D13	CC	postsynaptic actin cytoskeleton	│ │ ├─ postsynaptic actin cytoskeleton	GO:0099571			1	21	HGNC:2695	DBN1	DBN1	DBN1
GO:0150050	D14	CC	postsynaptic septin cytoskeleton	│ │ ├─ postsynaptic septin cytoskeleton	GO:0099571			0	1
GO:0099189	D15	CC	postsynaptic spectrin-associated cytoskeleton	│ │ └─ postsynaptic spectrin-associated cytoskeleton	GO:0099571			0	1
GO:0097444	D4	CC	spine apparatus	│ ├─ spine apparatus	GO:0098794			0	8
GO:0098897	D16	CC	spine apparatus membrane	│ │ └─ spine apparatus membrane	GO:0097444			0	2
GO:0099065	D30	CC	integral component of spine apparatus membrane	│ │ └─ integral component of spine apparatus membrane	GO:0098897			0	2
GO:0150051	D5	CC	postsynaptic Golgi apparatus	│ ├─ postsynaptic Golgi apparatus	GO:0098794			0	4
GO:0099572	D6	CC	postsynaptic specialization	│ ├─ postsynaptic specialization	GO:0098794	1.38299e-07		24	415	HGNC:5241;HGNC:10360;HGNC:30669;HGNC:4617;HGNC:10386;HGNC:10416;HGNC:10413;HGNC:10402;HGNC:10387;HGNC:10316;HGNC:10299;HGNC:5042;HGNC:2695;HGNC:5036;HGNC:1504;HGNC:19751;HGNC:16918;HGNC:30765;HGNC:1874;HGNC:3560;HGNC:2903;HGNC:815;HGNC:10928;HGNC:7994	HSPA8;RPL5;SNAP47;GSK3B;RPS13;RPS27;RPS25;RPS19;RPS14;RPL23;RPL10A;HNRNPH2;DBN1;HNRNPD;CASP3;SRGAP2;SYNCRIP;TNIK;CFL1;FABP5;DLG4;ATP2B2;SLC16A7;NRCAM	HSPA8;RPL5;SNAP47;GSK3B;RPS13;RPS27;RPS25;RPS19;RPS14;RPL23;RPL10A;HNRNPH2;DBN1;HNRNPD;CASP3;SRGAP2;SYNCRIP;TNIK;CFL1;FABP5;DLG4;ATP2B2;SLC16A7;NRCAM
GO:0099091	D17	CC	postsynaptic specialization, intracellular component	│ │ ├─ postsynaptic specialization, intracellular component	GO:0099572			0	11
GO:0099634	D18	CC	postsynaptic specialization membrane	│ │ ├─ postsynaptic specialization membrane	GO:0099572			1	48	HGNC:5241	HSPA8	HSPA8	HSPA8
GO:0098892	D31	CC	extrinsic component of postsynaptic specialization membrane	│ │ │ ├─ extrinsic component of postsynaptic specialization membrane	GO:0099634			0	2
GO:0099060	D32	CC	integral component of postsynaptic specialization membrane	│ │ │ └─ integral component of postsynaptic specialization membrane	GO:0099634			0	44
GO:0014069	D19	CC	postsynaptic density	│ │ ├─ postsynaptic density	GO:0099572	5.95142e-09	1.28947e-08	24	348	HGNC:10360;HGNC:30669;HGNC:4617;HGNC:10386;HGNC:10416;HGNC:10413;HGNC:10402;HGNC:10387;HGNC:10316;HGNC:10299;HGNC:5042;HGNC:2695;HGNC:5241;HGNC:5036;HGNC:1504;HGNC:19751;HGNC:16918;HGNC:30765;HGNC:1874;HGNC:3560;HGNC:2903;HGNC:815;HGNC:10928;HGNC:7994	RPL5;SNAP47;GSK3B;RPS13;RPS27;RPS25;RPS19;RPS14;RPL23;RPL10A;HNRNPH2;DBN1;HSPA8;HNRNPD;CASP3;SRGAP2;SYNCRIP;TNIK;CFL1;FABP5;DLG4;ATP2B2;SLC16A7;NRCAM	RPL5;SNAP47;GSK3B;RPS13;RPS27;RPS25;RPS19;RPS14;RPL23;RPL10A;HNRNPH2;DBN1;HSPA8;HNRNPD;CASP3;SRGAP2;SYNCRIP;TNIK;CFL1;FABP5;DLG4;ATP2B2;SLC16A7;NRCAM	RPL5;SNAP47;GSK3B;RPS13;RPS27;RPS25;RPS19;RPS14;RPL23;RPL10A;HNRNPH2;DBN1;HSPA8;HNRNPD;CASP3;SRGAP2;SYNCRIP
GO:0099092	D33	CC	postsynaptic density, intracellular component	│ │ │ ├─ postsynaptic density, intracellular component	GO:0014069			3	50	HGNC:30765;HGNC:1874;HGNC:3560	TNIK;CFL1;FABP5	TNIK;CFL1;FABP5	TNIK;CFL1;FABP5
GO:0098839	D34	CC	postsynaptic density membrane	│ │ │ └─ postsynaptic density membrane	GO:0014069	0.202715	0.219608	4	143	HGNC:2903;HGNC:815;HGNC:10928;HGNC:7994	DLG4;ATP2B2;SLC16A7;NRCAM	DLG4;ATP2B2;SLC16A7;NRCAM
GO:0099031	D41	CC	anchored component of postsynaptic density membrane	│ │ │ ├─ anchored component of postsynaptic density membrane	GO:0098839			1	11	HGNC:2903	DLG4	DLG4	DLG4
GO:0099147	D42	CC	extrinsic component of postsynaptic density membrane	│ │ │ ├─ extrinsic component of postsynaptic density membrane	GO:0098839			0	11
GO:0099061	D43	CC	integral component of postsynaptic density membrane	│ │ │ └─ integral component of postsynaptic density membrane	GO:0098839			3	113	HGNC:815;HGNC:10928;HGNC:7994	ATP2B2;SLC16A7;NRCAM	ATP2B2;SLC16A7;NRCAM	ATP2B2;SLC16A7;NRCAM
GO:0099629	D20	CC	postsynaptic specialization of symmetric synapse	│ │ └─ postsynaptic specialization of symmetric synapse	GO:0099572			0	4
GO:0099164	D35	CC	postsynaptic specialization membrane of symmetric synapse	│ │ └─ postsynaptic specialization membrane of symmetric synapse	GO:0099629			0	1
GO:0098843	D7	CC	postsynaptic endocytic zone	│ ├─ postsynaptic endocytic zone	GO:0098794			0	20
GO:0098844	D21	CC	postsynaptic endocytic zone membrane	│ │ └─ postsynaptic endocytic zone membrane	GO:0098843			0	2
GO:0098845	D8	CC	postsynaptic endosome	│ ├─ postsynaptic endosome	GO:0098794			0	24
GO:0098895	D22	CC	postsynaptic endosome membrane	│ │ ├─ postsynaptic endosome membrane	GO:0098845			0	3
GO:0098999	D36	CC	extrinsic component of postsynaptic endosome membrane	│ │ │ └─ extrinsic component of postsynaptic endosome membrane	GO:0098895			0	1
GO:0098842	D23	CC	postsynaptic early endosome	│ │ ├─ postsynaptic early endosome	GO:0098845			0	5
GO:0098896	D37	CC	postsynaptic early endosome membrane	│ │ │ └─ postsynaptic early endosome membrane	GO:0098842			0	1
GO:0098998	D44	CC	extrinsic component of postsynaptic early endosome membrane	│ │ │ └─ extrinsic component of postsynaptic early endosome membrane	GO:0098896			0	1
GO:0098837	D24	CC	postsynaptic recycling endosome	│ │ └─ postsynaptic recycling endosome	GO:0098845			0	11
GO:0098944	D38	CC	postsynaptic recycling endosome membrane	│ │ └─ postsynaptic recycling endosome membrane	GO:0098837			0	7
GO:0099033	D45	CC	anchored component of postsynaptic recycling endosome membrane	│ │ ├─ anchored component of postsynaptic recycling endosome membrane	GO:0098944			0	2
GO:0099063	D46	CC	integral component of postsynaptic recycling endosome membrane	│ │ └─ integral component of postsynaptic recycling endosome membrane	GO:0098944			0	2
GO:0045211	D9	CC	postsynaptic membrane	│ ├─ postsynaptic membrane	GO:0098794	0.0364719	0.0526816	6	149	HGNC:2695;HGNC:8032;HGNC:6759;HGNC:815;HGNC:7994;HGNC:7656	DBN1;NTRK2;MARCKS;ATP2B2;NRCAM;NCAM1	DBN1;NTRK2;MARCKS;ATP2B2;NRCAM;NCAM1	DBN1;NTRK2
GO:0099025	D25	CC	anchored component of postsynaptic membrane	│ │ ├─ anchored component of postsynaptic membrane	GO:0045211			1	5	HGNC:6759	MARCKS	MARCKS	MARCKS
GO:0098890	D26	CC	extrinsic component of postsynaptic membrane	│ │ ├─ extrinsic component of postsynaptic membrane	GO:0045211			0	12
GO:0099055	D27	CC	integral component of postsynaptic membrane	│ │ └─ integral component of postsynaptic membrane	GO:0045211			3	119	HGNC:815;HGNC:7994;HGNC:7656	ATP2B2;NRCAM;NCAM1	ATP2B2;NRCAM;NCAM1	ATP2B2;NRCAM;NCAM1
SYNGO:postsyn_ribosome	D10	CC	postsynaptic ribosome	│ ├─ postsynaptic ribosome	GO:0098794	4.32129e-12	1.87256e-11	15	70	HGNC:10298;HGNC:10299;HGNC:10316;HGNC:10317;HGNC:10360;HGNC:10377;HGNC:10385;HGNC:10387;HGNC:10386;HGNC:10397;HGNC:10402;HGNC:10409;HGNC:10421;HGNC:10369;HGNC:10416	RPL10;RPL10A;RPL23;RPL23A;RPL5;RPLP2;RPS12;RPS14;RPS13;RPS17;RPS19;RPS21;RPS3A;RPL9;RPS27	RPL10;RPL10A;RPL23;RPL23A;RPL5;RPLP2;RPS12;RPS14;RPS13;RPS17;RPS19;RPS21;RPS3A;RPL9;RPS27	RPL10;RPL10A;RPL23;RPL23A;RPL5;RPLP2;RPS12;RPS14;RPS13;RPS17;RPS19;RPS21;RPS3A;RPL9;RPS27
SYNGO:postsyn_er	D11	CC	postsynaptic ER	│ └─ postsynaptic ER	GO:0098794			0	9
SYNGO:postsyn_er_membrane	D28	CC	postsynaptic ER membrane	│ ├─ postsynaptic ER membrane	SYNGO:postsyn_er			0	2
SYNGO:postsyn_er_membrane_integral	D39	CC	integral component of postsynaptic ER membrane	│ │ └─ integral component of postsynaptic ER membrane	SYNGO:postsyn_er_membrane			0	2
SYNGO:postsyn_ser	D29	CC	postsynaptic SER	│ └─ postsynaptic SER	SYNGO:postsyn_er			0	4
SYNGO:postsyn_ser_membrane	D40	CC	postsynaptic SER membrane	│ └─ postsynaptic SER membrane	SYNGO:postsyn_ser			0	1
SYNGO:postsyn_ser_membrane_integral	D47	CC	integral component of postsynaptic SER membrane	│ └─ integral component of postsynaptic SER membrane	SYNGO:postsyn_ser_membrane			0	1
GO:0099544	E1	CC	extrasynaptic space	└─ extrasynaptic space	GO:0045202			1	7	HGNC:5318	TNC	TNC
GO:0098966	E2	CC	perisynaptic extracellular matrix	└─ perisynaptic extracellular matrix	GO:0099544			1	6	HGNC:5318	TNC	TNC	TNC
SYNGO:synprocess		BP	process in the synapse	process in the synapse		2.76686e-11	4.42697e-10	51	1117	HGNC:17072;HGNC:7142;HGNC:11133;HGNC:678;HGNC:22192;HGNC:1504;HGNC:9315;HGNC:2559;HGNC:5241;HGNC:10819;HGNC:815;HGNC:2903;HGNC:30765;HGNC:4617;HGNC:30669;HGNC:9944;HGNC:1464;HGNC:3560;HGNC:8032;HGNC:5044;HGNC:30829;HGNC:6470;HGNC:7656;HGNC:9630;HGNC:1874;HGNC:1226;HGNC:7994;HGNC:9857;HGNC:17074;HGNC:6759;HGNC:12666;HGNC:19751;HGNC:2365;HGNC:2700;HGNC:7732;HGNC:4140;HGNC:2695;HGNC:8988;HGNC:10369;…	ERC1;MARCKSL1;SNAP29;ARHGDIA;SCRN1;CASP3;PPP3CB;CXADR;HSPA8;SGTA;ATP2B2;DLG4;TNIK;GSK3B;SNAP47;RDX;CAMK4;FABP5;NTRK2;HNRNPK;TUBB2B;L1CAM;NCAM1;PTN;CFL1;GIPC1;NRCAM;RAP1B;SARM1;MARCKS;VCP;SRGAP2;CRMP1;DCLK1;NEDD8;GAP43;DBN1;PIN1;RPL9;RPL10;RPL10A;RPL23;RPL23A;RPL5;RPLP2;RPS12;RPS14;RPS13;RPS27;KIF3B;HNRNPU	ERC1;MARCKSL1;SNAP29;ARHGDIA;SCRN1;CASP3;PPP3CB;CXADR;HSPA8;SGTA;ATP2B2;DLG4;TNIK;GSK3B;SNAP47;RDX;CAMK4;FABP5;NTRK2;HNRNPK;TUBB2B;L1CAM;NCAM1;PTN;CFL1;GIPC1;NRCAM;RAP1B;SARM1;MARCKS;VCP;SRGAP2;CRMP1;DCLK1;NEDD8;GAP43;DBN1;PIN1;RPL9;RPL10;RPL10A;RPL23;RPL23A;RPL5;RPLP2;RPS12;RPS14;RPS13;RPS27;KIF3B;HNRNPU
SYNGO:presynprocess	F1	BP	process in the presynapse	├─ process in the presynapse	SYNGO:synprocess	0.0328489	0.0437985	10	313	HGNC:17072;HGNC:7142;HGNC:11133;HGNC:678;HGNC:22192;HGNC:1504;HGNC:9315;HGNC:2559;HGNC:5241;HGNC:10819	ERC1;MARCKSL1;SNAP29;ARHGDIA;SCRN1;CASP3;PPP3CB;CXADR;HSPA8;SGTA	ERC1;MARCKSL1;SNAP29;ARHGDIA;SCRN1;CASP3;PPP3CB;CXADR;HSPA8;SGTA
GO:0099509	F2	BP	regulation of presynaptic cytosolic calcium levels	│ ├─ regulation of presynaptic cytosolic calcium levels	SYNGO:presynprocess			2	29	HGNC:17072;HGNC:7142	ERC1;MARCKSL1	ERC1;MARCKSL1	ERC1;MARCKSL1
GO:1905056	F11	BP	ATPase-coupled calcium ion transmembrane transporter activity involved in regulation of presynaptic cytosolic calcium levels	│ │ ├─ ATPase-coupled calcium ion transmembrane transporter activity involved in regulation of presynaptic cytosolic calcium levels	GO:0099509			0	1
GO:0099534	F12	BP	calcium ion binding involved in regulation of presynaptic cytosolic calcium levels	│ │ ├─ calcium ion binding involved in regulation of presynaptic cytosolic calcium levels	GO:0099509			0	2
GO:0099626	F13	BP	voltage-gated calcium channel activity involved in regulation of presynaptic cytosolic calcium levels	│ │ └─ voltage-gated calcium channel activity involved in regulation of presynaptic cytosolic calcium levels	GO:0099509			0	9
GO:0099505	F3	BP	regulation of presynaptic membrane potential	│ ├─ regulation of presynaptic membrane potential	SYNGO:presynprocess			0	48
GO:0099507	F14	BP	ligand-gated ion channel activity involved in regulation of presynaptic membrane potential	│ │ ├─ ligand-gated ion channel activity involved in regulation of presynaptic membrane potential	GO:0099505			0	24
GO:0099508	F15	BP	voltage-gated ion channel activity involved in regulation of presynaptic membrane potential	│ │ ├─ voltage-gated ion channel activity involved in regulation of presynaptic membrane potential	GO:0099505			0	17
GO:0150047	F16	BP	G protein-coupled neurotransmitter receptor activity involved in regulation of presynaptic membrane potential	│ │ ├─ G protein-coupled neurotransmitter receptor activity involved in regulation of presynaptic membrane potential	GO:0099505			0	5
GO:0140232	F17	BP	intracellular cAMP-activated cation channel activity involved in regulation of presynaptic membrane potential	│ │ └─ intracellular cAMP-activated cation channel activity involved in regulation of presynaptic membrane potential	GO:0099505			0	1
GO:0140238	F4	BP	presynaptic endocytosis	│ ├─ presynaptic endocytosis	SYNGO:presynprocess			0	6
GO:0099504	F5	BP	synaptic vesicle cycle	│ ├─ synaptic vesicle cycle	SYNGO:presynprocess	0.0299048	0.0434979	8	222	HGNC:11133;HGNC:678;HGNC:22192;HGNC:1504;HGNC:17072;HGNC:9315;HGNC:2559;HGNC:5241	SNAP29;ARHGDIA;SCRN1;CASP3;ERC1;PPP3CB;CXADR;HSPA8	SNAP29;ARHGDIA;SCRN1;CASP3;ERC1;PPP3CB;CXADR;HSPA8
GO:0098693	F18	BP	regulation of synaptic vesicle cycle	│ │ ├─ regulation of synaptic vesicle cycle	GO:0099504	0.00059025	0.001574	4	21	HGNC:11133;HGNC:678;HGNC:22192;HGNC:1504	SNAP29;ARHGDIA;SCRN1;CASP3	SNAP29;ARHGDIA;SCRN1;CASP3	SNAP29;ARHGDIA;SCRN1;CASP3
GO:0097091	F19	BP	synaptic vesicle clustering	│ │ ├─ synaptic vesicle clustering	GO:0099504			0	9
GO:0099532	F20	BP	synaptic vesicle endosomal processing	│ │ ├─ synaptic vesicle endosomal processing	GO:0099504			0	13
GO:0016182	F29	BP	synaptic vesicle budding from endosome	│ │ │ ├─ synaptic vesicle budding from endosome	GO:0099532			0	4
GO:0016189	F30	BP	synaptic vesicle to endosome fusion	│ │ │ └─ synaptic vesicle to endosome fusion	GO:0099532			0	5
GO:0016079	F21	BP	synaptic vesicle exocytosis	│ │ ├─ synaptic vesicle exocytosis	GO:0099504			2	83	HGNC:17072;HGNC:11133	ERC1;SNAP29	ERC1;SNAP29
GO:0099502	F31	BP	calcium-dependent activation of synaptic vesicle fusion	│ │ │ ├─ calcium-dependent activation of synaptic vesicle fusion	GO:0016079			1	13	HGNC:17072	ERC1	ERC1
GO:0150037	F41	BP	regulation of calcium-dependent activation of synaptic vesicle fusion	│ │ │ │ └─ regulation of calcium-dependent activation of synaptic vesicle fusion	GO:0099502			1	7	HGNC:17072	ERC1	ERC1	ERC1
GO:2000300	F32	BP	regulation of synaptic vesicle exocytosis	│ │ │ ├─ regulation of synaptic vesicle exocytosis	GO:0016079			1	37	HGNC:11133	SNAP29	SNAP29	SNAP29
GO:0016081	F33	BP	synaptic vesicle docking	│ │ │ ├─ synaptic vesicle docking	GO:0016079			0	8
GO:0099148	F42	BP	regulation of synaptic vesicle docking	│ │ │ │ └─ regulation of synaptic vesicle docking	GO:0016081			0	3
GO:0031629	F34	BP	synaptic vesicle fusion to presynaptic active zone membrane	│ │ │ ├─ synaptic vesicle fusion to presynaptic active zone membrane	GO:0016079			0	6
GO:0031630	F43	BP	regulation of synaptic vesicle fusion to presynaptic active zone membrane	│ │ │ │ └─ regulation of synaptic vesicle fusion to presynaptic active zone membrane	GO:0031629			0	5
GO:0016082	F35	BP	synaptic vesicle priming	│ │ │ └─ synaptic vesicle priming	GO:0016079			1	19	HGNC:17072	ERC1	ERC1	ERC1
GO:0010807	F44	BP	regulation of synaptic vesicle priming	│ │ │ └─ regulation of synaptic vesicle priming	GO:0016082			0	7
GO:0098700	F22	BP	synaptic vesicle neurotransmitter loading	│ │ ├─ synaptic vesicle neurotransmitter loading	GO:0099504			0	9
GO:0099162	F36	BP	regulation of synaptic vesicle neurotransmitter loading	│ │ │ └─ regulation of synaptic vesicle neurotransmitter loading	GO:0098700			0	2
GO:0099180	F23	BP	zinc ion import into synaptic vesicle	│ │ ├─ zinc ion import into synaptic vesicle	GO:0099504			0	2
GO:0097401	F24	BP	synaptic vesicle proton loading	│ │ ├─ synaptic vesicle proton loading	GO:0099504			0	20
GO:1901546	F37	BP	regulation of proton loading	│ │ │ └─ regulation of proton loading	GO:0097401			0	2
GO:0048488	F25	BP	synaptic vesicle endocytosis	│ │ └─ synaptic vesicle endocytosis	GO:0099504			3	71	HGNC:9315;HGNC:2559;HGNC:5241	PPP3CB;CXADR;HSPA8	PPP3CB;CXADR;HSPA8
GO:1900242	F38	BP	regulation of synaptic vesicle endocytosis	│ │ ├─ regulation of synaptic vesicle endocytosis	GO:0048488			2	24	HGNC:9315;HGNC:2559	PPP3CB;CXADR	PPP3CB;CXADR	PPP3CB;CXADR
GO:0016185	F39	BP	synaptic vesicle budding from presynaptic endocytic zone membrane	│ │ ├─ synaptic vesicle budding from presynaptic endocytic zone membrane	GO:0048488			0	1
GO:0098694	F45	BP	regulation of synaptic vesicle budding from presynaptic endocytic zone membrane	│ │ │ └─ regulation of synaptic vesicle budding from presynaptic endocytic zone membrane	GO:0016185			0	1
GO:0016191	F40	BP	synaptic vesicle uncoating	│ │ └─ synaptic vesicle uncoating	GO:0048488			1	3	HGNC:5241	HSPA8	HSPA8	HSPA8
GO:0099525	F6	BP	presynaptic dense core vesicle exocytosis	│ ├─ presynaptic dense core vesicle exocytosis	SYNGO:presynprocess			0	24
GO:0099161	F26	BP	regulation of presynaptic dense core vesicle exocytosis	│ │ └─ regulation of presynaptic dense core vesicle exocytosis	GO:0099525			0	11
GO:0001504	F7	BP	neurotransmitter uptake	│ ├─ neurotransmitter uptake	SYNGO:presynprocess			0	6
GO:0098810	F8	BP	neurotransmitter reuptake	│ ├─ neurotransmitter reuptake	SYNGO:presynprocess			0	10
GO:0051580	F27	BP	regulation of neurotransmitter uptake	│ │ └─ regulation of neurotransmitter uptake	GO:0098810			0	5
SYNGO:presyn_chaperoneProteinFolding	F9	BP	presynaptic chaperone-mediated protein folding	│ ├─ presynaptic chaperone-mediated protein folding	SYNGO:presynprocess			2	3	HGNC:10819;HGNC:5241	SGTA;HSPA8	SGTA;HSPA8	SGTA;HSPA8
GO:0098928	F10	BP	presynaptic signaling pathway	│ └─ presynaptic signaling pathway	SYNGO:presynprocess			0	2
GO:0099526	F28	BP	presynapse to nucleus signaling pathway	│ └─ presynapse to nucleus signaling pathway	GO:0098928			0	1
SYNGO:postsynprocess	G1	BP	process in the postsynapse	├─ process in the postsynapse	SYNGO:synprocess	0.155235	0.155235	7	273	HGNC:815;HGNC:2903;HGNC:30765;HGNC:4617;HGNC:30669;HGNC:9944;HGNC:1464	ATP2B2;DLG4;TNIK;GSK3B;SNAP47;RDX;CAMK4	ATP2B2;DLG4;TNIK;GSK3B;SNAP47;RDX;CAMK4
GO:0099566	G2	BP	regulation of postsynaptic cytosolic calcium levels	│ ├─ regulation of postsynaptic cytosolic calcium levels	SYNGO:postsynprocess			1	12	HGNC:815	ATP2B2	ATP2B2
GO:1905059	G9	BP	ATPase-coupled calcium ion transmembrane transporter activity involved in regulation of postsynaptic cytosolic calcium levels	│ │ ├─ ATPase-coupled calcium ion transmembrane transporter activity involved in regulation of postsynaptic cytosolic calcium levels	GO:0099566			1	1	HGNC:815	ATP2B2	ATP2B2	ATP2B2
GO:0099567	G10	BP	calcium ion binding involved in regulation of postsynaptic cytosolic calcium levels	│ │ ├─ calcium ion binding involved in regulation of postsynaptic cytosolic calcium levels	GO:0099566			0	1
GO:1905060	G11	BP	calcium:cation antiporter activity involved in regulation of postsynaptic cytosolic calcium ion levels	│ │ ├─ calcium:cation antiporter activity involved in regulation of postsynaptic cytosolic calcium ion levels	GO:0099566			0	3
GO:0098695	G12	BP	inositol 1,4,5-trisphosphate receptor activity involved in regulation of postsynaptic cytosolic calcium levels	│ │ ├─ inositol 1,4,5-trisphosphate receptor activity involved in regulation of postsynaptic cytosolic calcium levels	GO:0099566			0	1
GO:0099583	G13	BP	neurotransmitter receptor activity involved in regulation of postsynaptic cytosolic calcium levels	│ │ └─ neurotransmitter receptor activity involved in regulation of postsynaptic cytosolic calcium levels	GO:0099566			0	1
GO:0098872	G23	BP	G-protein coupled neurotransmitter receptor activity involved in regulation of postsynaptic cytosolic calcium levels	│ │ └─ G-protein coupled neurotransmitter receptor activity involved in regulation of postsynaptic cytosolic calcium levels	GO:0099583			0	1
GO:0060078	G3	BP	regulation of postsynaptic membrane potential	│ ├─ regulation of postsynaptic membrane potential	SYNGO:postsynprocess			0	60
GO:0140233	G14	BP	intracellular cAMP-activated cation channel activity involved in regulation of postsynaptic membrane potential	│ │ ├─ intracellular cAMP-activated cation channel activity involved in regulation of postsynaptic membrane potential	GO:0060078			0	4
GO:0099579	G24	BP	G protein-coupled neurotransmitter receptor activity involved in regulation of postsynaptic membrane potential	│ │ │ └─ G protein-coupled neurotransmitter receptor activity involved in regulation of postsynaptic membrane potential	GO:0140233			0	4
GO:1904315	G15	BP	transmitter-gated ion channel activity involved in regulation of postsynaptic membrane potential	│ │ ├─ transmitter-gated ion channel activity involved in regulation of postsynaptic membrane potential	GO:0060078			0	42
GO:1905030	G16	BP	voltage-gated ion channel activity involved in regulation of postsynaptic membrane potential	│ │ └─ voltage-gated ion channel activity involved in regulation of postsynaptic membrane potential	GO:0060078			0	5
GO:0098962	G4	BP	regulation of postsynaptic neurotransmitter receptor activity	│ ├─ regulation of postsynaptic neurotransmitter receptor activity	SYNGO:postsynprocess			0	22
GO:0099072	G5	BP	regulation of postsynaptic membrane neurotransmitter receptor levels	│ ├─ regulation of postsynaptic membrane neurotransmitter receptor levels	SYNGO:postsynprocess	0.13653	0.145632	5	167	HGNC:2903;HGNC:30765;HGNC:4617;HGNC:30669;HGNC:9944	DLG4;TNIK;GSK3B;SNAP47;RDX	DLG4;TNIK;GSK3B;SNAP47;RDX
GO:0099645	G17	BP	neurotransmitter receptor localization to postsynaptic specialization membrane	│ │ ├─ neurotransmitter receptor localization to postsynaptic specialization membrane	GO:0099072			3	58	HGNC:2903;HGNC:30765;HGNC:4617	DLG4;TNIK;GSK3B	DLG4;TNIK;GSK3B	DLG4
GO:0098696	G25	BP	regulation of neurotransmitter receptor localization to postsynaptic specialization membrane	│ │ │ └─ regulation of neurotransmitter receptor localization to postsynaptic specialization membrane	GO:0099645			2	32	HGNC:30765;HGNC:4617	TNIK;GSK3B	TNIK;GSK3B	TNIK;GSK3B
GO:0098967	G18	BP	exocytic insertion of neurotransmitter receptor to postsynaptic membrane	│ │ ├─ exocytic insertion of neurotransmitter receptor to postsynaptic membrane	GO:0099072			1	8	HGNC:30669	SNAP47	SNAP47	SNAP47
GO:0099145	G26	BP	regulation of exocytic insertion of neurotransmitter receptor to postsynaptic membrane	│ │ │ └─ regulation of exocytic insertion of neurotransmitter receptor to postsynaptic membrane	GO:0098967			0	2
GO:0098970	G19	BP	postsynaptic neurotransmitter receptor diffusion trapping	│ │ ├─ postsynaptic neurotransmitter receptor diffusion trapping	GO:0099072			1	8	HGNC:9944	RDX	RDX
GO:0150054	G27	BP	regulation of postsynaptic neurotransmitter receptor diffusion trapping	│ │ │ └─ regulation of postsynaptic neurotransmitter receptor diffusion trapping	GO:0098970			1	5	HGNC:9944	RDX	RDX	RDX
GO:0098884	G20	BP	postsynaptic neurotransmitter receptor endocytosis	│ │ └─ postsynaptic neurotransmitter receptor endocytosis	GO:0099072			0	54
GO:0099149	G28	BP	regulation of postsynaptic neurotransmitter receptor endocytosis	│ │ └─ regulation of postsynaptic neurotransmitter receptor endocytosis	GO:0098884			0	43
GO:0140239	G6	BP	postsynaptic endocytosis	│ ├─ postsynaptic endocytosis	SYNGO:postsynprocess			0	1
GO:0150038	G7	BP	postsynaptic dense core vesicle exocytosis	│ ├─ postsynaptic dense core vesicle exocytosis	SYNGO:postsynprocess			0	2
GO:0150044	G21	BP	regulation of postsynaptic dense core vesicle exocytosis	│ │ └─ regulation of postsynaptic dense core vesicle exocytosis	GO:0150038			0	1
GO:0098926	G8	BP	postsynaptic signaling pathway	│ └─ postsynaptic signaling pathway	SYNGO:postsynprocess			1	18	HGNC:1464	CAMK4	CAMK4
GO:0099527	G22	BP	postsynapse to nucleus signaling pathway	│ └─ postsynapse to nucleus signaling pathway	GO:0098926			1	16	HGNC:1464	CAMK4	CAMK4	CAMK4
GO:1905539	G29	BP	regulation of postsynapse to nucleus signaling pathway	│ └─ regulation of postsynapse to nucleus signaling pathway	GO:0099527			0	2
GO:0099536	H1	BP	synaptic signaling	├─ synaptic signaling	SYNGO:synprocess	0.00122674		11	222	HGNC:3560;HGNC:8032;HGNC:5044;HGNC:30829;HGNC:6470;HGNC:7656;HGNC:9630;HGNC:1874;HGNC:1226;HGNC:4617;HGNC:1464	FABP5;NTRK2;HNRNPK;TUBB2B;L1CAM;NCAM1;PTN;CFL1;GIPC1;GSK3B;CAMK4	FABP5;NTRK2;HNRNPK;TUBB2B;L1CAM;NCAM1;PTN;CFL1;GIPC1;GSK3B;CAMK4
GO:0099537	H2	BP	trans-synaptic signaling	│ ├─ trans-synaptic signaling	GO:0099536	0.000924637	0.00211346	11	214	HGNC:3560;HGNC:8032;HGNC:5044;HGNC:30829;HGNC:6470;HGNC:7656;HGNC:9630;HGNC:1874;HGNC:1226;HGNC:4617;HGNC:1464	FABP5;NTRK2;HNRNPK;TUBB2B;L1CAM;NCAM1;PTN;CFL1;GIPC1;GSK3B;CAMK4	FABP5;NTRK2;HNRNPK;TUBB2B;L1CAM;NCAM1;PTN;CFL1;GIPC1;GSK3B;CAMK4
GO:0099541	H5	BP	trans-synaptic signaling by lipid	│ │ ├─ trans-synaptic signaling by lipid	GO:0099537			1	11	HGNC:3560	FABP5	FABP5
GO:0099542	H14	BP	trans-synaptic signaling by endocannabinoid	│ │ │ └─ trans-synaptic signaling by endocannabinoid	GO:0099541			1	11	HGNC:3560	FABP5	FABP5
GO:0098921	H22	BP	retrograde trans-synaptic signaling by endocannabinoid	│ │ │ ├─ retrograde trans-synaptic signaling by endocannabinoid	GO:0099542			1	6	HGNC:3560	FABP5	FABP5	FABP5
GO:0099178	H27	BP	regulation of retrograde trans-synaptic signaling by endocanabinoid	│ │ │ │ └─ regulation of retrograde trans-synaptic signaling by endocanabinoid	GO:0098921			0	3
GO:0099553	H23	BP	trans-synaptic signaling by endocannabinoid, modulating synaptic transmission	│ │ │ └─ trans-synaptic signaling by endocannabinoid, modulating synaptic transmission	GO:0099542			0	5
GO:0150036	H28	BP	regulation of trans-synaptic signaling by endocannabinoid, modulating synaptic transmission	│ │ │ └─ regulation of trans-synaptic signaling by endocannabinoid, modulating synaptic transmission	GO:0099553			0	4
GO:0099540	H6	BP	trans-synaptic signaling by neuropeptide	│ │ ├─ trans-synaptic signaling by neuropeptide	GO:0099537			0	1
GO:0099543	H7	BP	trans-synaptic signaling by soluble gas	│ │ ├─ trans-synaptic signaling by soluble gas	GO:0099537			0	1
GO:0099548	H15	BP	trans-synaptic signaling by nitric oxide	│ │ │ └─ trans-synaptic signaling by nitric oxide	GO:0099543			0	1
GO:0099555	H24	BP	trans-synaptic signaling by nitric oxide, modulating synaptic transmission	│ │ │ └─ trans-synaptic signaling by nitric oxide, modulating synaptic transmission	GO:0099548			0	1
GO:0098925	H29	BP	retrograde trans-synaptic signaling by nitric oxide, modulating synaptic transmission	│ │ │ └─ retrograde trans-synaptic signaling by nitric oxide, modulating synaptic transmission	GO:0099555			0	1
GO:0099545	H8	BP	trans-synaptic signaling by trans-synaptic complex	│ │ ├─ trans-synaptic signaling by trans-synaptic complex	GO:0099537			0	9
GO:0098942	H16	BP	retrograde trans-synaptic signaling by trans-synaptic protein complex	│ │ │ ├─ retrograde trans-synaptic signaling by trans-synaptic protein complex	GO:0099545			0	4
GO:0099557	H17	BP	trans-synaptic signaling by trans-synaptic complex, modulating synaptic transmission	│ │ │ └─ trans-synaptic signaling by trans-synaptic complex, modulating synaptic transmission	GO:0099545			0	2
GO:0099157	H9	BP	trans-synaptic signalling via exosome	│ │ ├─ trans-synaptic signalling via exosome	GO:0099537			0	1
GO:0099183	H10	BP	trans-synaptic signaling by BDNF, modulating synaptic transmission	│ │ ├─ trans-synaptic signaling by BDNF, modulating synaptic transmission	GO:0099537			1	6	HGNC:8032	NTRK2	NTRK2	NTRK2
GO:0150035	H18	BP	regulation of trans-synaptic signaling by BDNF, modulating synaptic transmission	│ │ │ └─ regulation of trans-synaptic signaling by BDNF, modulating synaptic transmission	GO:0099183			0	2
GO:0099550	H11	BP	trans-synaptic signaling, modulating synaptic transmission	│ │ ├─ trans-synaptic signaling, modulating synaptic transmission	GO:0099537			0	7
GO:0007268	H12	BP	chemical synaptic transmission	│ │ └─ chemical synaptic transmission	GO:0099537	0.00315851	0.00561514	9	180	HGNC:5044;HGNC:30829;HGNC:6470;HGNC:7656;HGNC:9630;HGNC:1874;HGNC:1226;HGNC:4617;HGNC:1464	HNRNPK;TUBB2B;L1CAM;NCAM1;PTN;CFL1;GIPC1;GSK3B;CAMK4	HNRNPK;TUBB2B;L1CAM;NCAM1;PTN;CFL1;GIPC1;GSK3B;CAMK4
GO:0050804	H19	BP	modulation of chemical synaptic transmission	│ │ ├─ modulation of chemical synaptic transmission	GO:0007268	0.00639328	0.0102293	6	99	HGNC:5044;HGNC:30829;HGNC:6470;HGNC:7656;HGNC:9630;HGNC:1874	HNRNPK;TUBB2B;L1CAM;NCAM1;PTN;CFL1	HNRNPK;TUBB2B;L1CAM;NCAM1;PTN;CFL1	HNRNPK;TUBB2B;L1CAM;NCAM1;PTN;CFL1
GO:0099531	H20	BP	presynaptic process involved in chemical synaptic transmission	│ │ ├─ presynaptic process involved in chemical synaptic transmission	GO:0007268			2	48	HGNC:1226;HGNC:4617	GIPC1;GSK3B	GIPC1;GSK3B
GO:0099171	H25	BP	presynaptic modulation of chemical synaptic transmission	│ │ │ └─ presynaptic modulation of chemical synaptic transmission	GO:0099531			2	48	HGNC:1226;HGNC:4617	GIPC1;GSK3B	GIPC1;GSK3B	GIPC1;GSK3B
GO:0099565	H21	BP	postsynaptic process involved in chemical synaptic transmission	│ │ └─ postsynaptic process involved in chemical synaptic transmission	GO:0007268			1	39	HGNC:1464	CAMK4	CAMK4
GO:0099170	H26	BP	postsynaptic modulation of chemical synaptic transmission	│ │ └─ postsynaptic modulation of chemical synaptic transmission	GO:0099565			1	33	HGNC:1464	CAMK4	CAMK4	CAMK4
GO:0099538	H3	BP	synaptic signaling via neuropeptide	│ ├─ synaptic signaling via neuropeptide	GO:0099536			0	8
GO:0099163	H4	BP	synaptic signaling by nitric oxide	│ └─ synaptic signaling by nitric oxide	GO:0099536			0	3
GO:0150045	H13	BP	regulation of synaptic signaling by nitric oxide	│ └─ regulation of synaptic signaling by nitric oxide	GO:0099163			0	2
GO:0050808	I1	BP	synapse organization	├─ synapse organization	SYNGO:synprocess	8.41085e-05	0.000269147	19	424	HGNC:5044;HGNC:7994;HGNC:5241;HGNC:9857;HGNC:17074;HGNC:4617;HGNC:1874;HGNC:6759;HGNC:12666;HGNC:17072;HGNC:2903;HGNC:7656;HGNC:6470;HGNC:19751;HGNC:2365;HGNC:2700;HGNC:7732;HGNC:4140;HGNC:2695	HNRNPK;NRCAM;HSPA8;RAP1B;SARM1;GSK3B;CFL1;MARCKS;VCP;ERC1;DLG4;NCAM1;L1CAM;SRGAP2;CRMP1;DCLK1;NEDD8;GAP43;DBN1	HNRNPK;NRCAM;HSPA8;RAP1B;SARM1;GSK3B;CFL1;MARCKS;VCP;ERC1;DLG4;NCAM1;L1CAM;SRGAP2;CRMP1;DCLK1;NEDD8;GAP43;DBN1
GO:0099172	I2	BP	presynapse organization	│ ├─ presynapse organization	GO:0050808			0	2
GO:0099174	I16	BP	regulation of presynapse organization	│ │ └─ regulation of presynapse organization	GO:0099172			0	2
GO:0099173	I3	BP	postsynapse organization	│ ├─ postsynapse organization	GO:0050808			3	75	HGNC:5044;HGNC:7994;HGNC:5241	HNRNPK;NRCAM;HSPA8	HNRNPK;NRCAM;HSPA8
GO:0099175	I17	BP	regulation of postsynapse organization	│ │ ├─ regulation of postsynapse organization	GO:0099173			3	55	HGNC:5044;HGNC:7994;HGNC:5241	HNRNPK;NRCAM;HSPA8	HNRNPK;NRCAM;HSPA8	HNRNPK;NRCAM;HSPA8
GO:0099084	I18	BP	postsynaptic specialization organization	│ │ └─ postsynaptic specialization organization	GO:0099173			0	4
GO:0099563	I4	BP	modification of synaptic structure	│ ├─ modification of synaptic structure	GO:0050808	0.00253604		5	55	HGNC:9857;HGNC:17074;HGNC:4617;HGNC:1874;HGNC:6759	RAP1B;SARM1;GSK3B;CFL1;MARCKS	RAP1B;SARM1;GSK3B;CFL1;MARCKS
GO:0099010	I19	BP	modification of postsynaptic structure	│ │ ├─ modification of postsynaptic structure	GO:0099563	0.00202012	0.00404024	5	52	HGNC:9857;HGNC:17074;HGNC:4617;HGNC:1874;HGNC:6759	RAP1B;SARM1;GSK3B;CFL1;MARCKS	RAP1B;SARM1;GSK3B;CFL1;MARCKS	RAP1B;SARM1
GO:0099159	I36	BP	regulation of modification of postsynaptic structure	│ │ │ ├─ regulation of modification of postsynaptic structure	GO:0099010			1	19	HGNC:4617	GSK3B	GSK3B	GSK3B
GO:0098885	I37	BP	modification of postsynaptic actin cytoskeleton	│ │ │ └─ modification of postsynaptic actin cytoskeleton	GO:0099010			2	26	HGNC:1874;HGNC:6759	CFL1;MARCKS	CFL1;MARCKS	CFL1
GO:1905274	I50	BP	regulation of modification of postsynaptic actin cytoskeleton	│ │ │ └─ regulation of modification of postsynaptic actin cytoskeleton	GO:0098885			1	13	HGNC:6759	MARCKS	MARCKS	MARCKS
GO:0099564	I20	BP	modification of synaptic structure, modulating synaptic transmission	│ │ ├─ modification of synaptic structure, modulating synaptic transmission	GO:0099563			0	1
GO:1905244	I21	BP	regulation of modification of synaptic structure	│ │ └─ regulation of modification of synaptic structure	GO:0099563			0	2
GO:0098987	I38	BP	regulation of modification of synapse structure, modulating synaptic transmission	│ │ └─ regulation of modification of synapse structure, modulating synaptic transmission	GO:1905244			0	2
GO:0050807	I5	BP	regulation of synapse organization	│ ├─ regulation of synapse organization	GO:0050808			1	29	HGNC:12666	VCP	VCP	VCP
GO:0098918	I6	BP	structural constituent of synapse	│ ├─ structural constituent of synapse	GO:0050808			2	38	HGNC:17072;HGNC:2903	ERC1;DLG4	ERC1;DLG4
GO:0099181	I22	BP	structural constituent of presynapse	│ │ ├─ structural constituent of presynapse	GO:0098918			1	11	HGNC:17072	ERC1	ERC1
GO:0098882	I39	BP	structural constituent of active zone	│ │ │ ├─ structural constituent of active zone	GO:0099181			1	8	HGNC:17072	ERC1	ERC1	ERC1
GO:0098699	I40	BP	structural constituent of presynaptic actin cytoskeleton	│ │ │ └─ structural constituent of presynaptic actin cytoskeleton	GO:0099181			0	1
GO:0099186	I23	BP	structural constituent of postsynapse	│ │ └─ structural constituent of postsynapse	GO:0098918			1	28	HGNC:2903	DLG4	DLG4
GO:0098973	I41	BP	structural constituent of postsynaptic actin cytoskeleton	│ │ ├─ structural constituent of postsynaptic actin cytoskeleton	GO:0099186			0	6
GO:0099184	I42	BP	structural constituent of postsynaptic intermediate filament cytoskeleton	│ │ ├─ structural constituent of postsynaptic intermediate filament cytoskeleton	GO:0099186			0	2
GO:0098879	I43	BP	structural constituent of postsynaptic specialization	│ │ ├─ structural constituent of postsynaptic specialization	GO:0099186			0	3
GO:0098919	I44	BP	structural constituent of postsynaptic density	│ │ └─ structural constituent of postsynaptic density	GO:0099186			1	13	HGNC:2903	DLG4	DLG4	DLG4
GO:0150043	I7	BP	structural constituent of synapse-associated extracellular matrix	│ ├─ structural constituent of synapse-associated extracellular matrix	GO:0050808			0	1
GO:0099560	I8	BP	synapse adhesion between pre- and post-synapse	│ ├─ synapse adhesion between pre- and post-synapse	GO:0050808			1	45	HGNC:7656	NCAM1	NCAM1	NCAM1
GO:0099179	I24	BP	regulation of synaptic membrane adhesion	│ │ └─ regulation of synaptic membrane adhesion	GO:0099560			0	7
GO:0008039	I9	BP	synaptic target recognition	│ ├─ synaptic target recognition	GO:0050808			0	3
GO:0007416	I10	BP	synapse assembly	│ ├─ synapse assembly	GO:0050808	0.0517115	0.0590989	6	163	HGNC:6470;HGNC:19751;HGNC:2365;HGNC:2700;HGNC:7732;HGNC:4140	L1CAM;SRGAP2;CRMP1;DCLK1;NEDD8;GAP43	L1CAM;SRGAP2;CRMP1;DCLK1;NEDD8;GAP43
GO:0099054	I25	BP	presynapse assembly	│ │ ├─ presynapse assembly	GO:0007416			0	15
GO:0051963	I26	BP	regulation of synapse assembly	│ │ ├─ regulation of synapse assembly	GO:0007416	0.039138	0.0481699	5	113	HGNC:6470;HGNC:19751;HGNC:2365;HGNC:2700;HGNC:7732	L1CAM;SRGAP2;CRMP1;DCLK1;NEDD8	L1CAM;SRGAP2;CRMP1;DCLK1;NEDD8	L1CAM;SRGAP2
GO:1905606	I45	BP	regulation of presynapse assembly	│ │ │ ├─ regulation of presynapse assembly	GO:0051963			0	31
GO:0150052	I46	BP	regulation of postsynapse assembly	│ │ │ └─ regulation of postsynapse assembly	GO:0051963			3	62	HGNC:2365;HGNC:2700;HGNC:7732	CRMP1;DCLK1;NEDD8	CRMP1;DCLK1;NEDD8	CRMP1;DCLK1;NEDD8
GO:0098698	I27	BP	postsynaptic specialization assembly	│ │ ├─ postsynaptic specialization assembly	GO:0007416			1	40	HGNC:4140	GAP43	GAP43
GO:0099150	I47	BP	regulation of postsynaptic specialization assembly	│ │ │ ├─ regulation of postsynaptic specialization assembly	GO:0098698			1	9	HGNC:4140	GAP43	GAP43	GAP43
GO:0097107	I48	BP	postsynaptic density assembly	│ │ │ └─ postsynaptic density assembly	GO:0098698			0	26
GO:0099151	I51	BP	regulation of postsynaptic density assembly	│ │ │ └─ regulation of postsynaptic density assembly	GO:0097107			0	20
GO:0097104	I28	BP	postsynaptic membrane assembly	│ │ └─ postsynaptic membrane assembly	GO:0007416			0	1
GO:0098883	I11	BP	synapse disassembly	│ ├─ synapse disassembly	GO:0050808			1	11	HGNC:17074	SARM1	SARM1
GO:1905806	I29	BP	regulation of synapse disassembly	│ │ └─ regulation of synapse disassembly	GO:0098883			1	11	HGNC:17074	SARM1	SARM1	SARM1
GO:0060074	I12	BP	synapse maturation	│ ├─ synapse maturation	GO:0050808			0	34
GO:0090128	I30	BP	regulation of synapse maturation	│ │ └─ regulation of synapse maturation	GO:0060074			0	27
GO:0099558	I13	BP	maintenance of synapse structure	│ ├─ maintenance of synapse structure	GO:0050808			2	23	HGNC:6470;HGNC:5241	L1CAM;HSPA8	L1CAM;HSPA8	L1CAM
GO:0099559	I31	BP	maintenance of alignment of postsynaptic density and presynaptic active zone	│ │ ├─ maintenance of alignment of postsynaptic density and presynaptic active zone	GO:0099558			0	4
GO:0098880	I32	BP	maintenance of postsynaptic specialization structure	│ │ └─ maintenance of postsynaptic specialization structure	GO:0099558			1	13	HGNC:5241	HSPA8	HSPA8	HSPA8
GO:0099562	I49	BP	maintenance of postsynaptic density structure	│ │ └─ maintenance of postsynaptic density structure	GO:0098880			0	6
GO:0099187	I14	BP	presynaptic cytoskeleton organization	│ ├─ presynaptic cytoskeleton organization	GO:0050808			0	9
GO:0099140	I33	BP	presynaptic actin cytoskeleton organization	│ │ └─ presynaptic actin cytoskeleton organization	GO:0099187			0	8
GO:0099188	I15	BP	postsynaptic cytoskeleton organization	│ └─ postsynaptic cytoskeleton organization	GO:0050808			1	27	HGNC:2695	DBN1	DBN1
GO:0098974	I34	BP	postsynaptic actin cytoskeleton organization	│ ├─ postsynaptic actin cytoskeleton organization	GO:0099188			1	21	HGNC:2695	DBN1	DBN1	DBN1
GO:0099190	I35	BP	postsynaptic spectrin-associated cytoskeleton organization	│ └─ postsynaptic spectrin-associated cytoskeleton organization	GO:0099188			0	4
SYNGO:metabolism	J1	BP	metabolism	├─ metabolism	SYNGO:synprocess	3.63617e-07	1.45447e-06	12	106	HGNC:8988;HGNC:10369;HGNC:10298;HGNC:10299;HGNC:10316;HGNC:10317;HGNC:10360;HGNC:10377;HGNC:10385;HGNC:10387;HGNC:10386;HGNC:10416	PIN1;RPL9;RPL10;RPL10A;RPL23;RPL23A;RPL5;RPLP2;RPS12;RPS14;RPS13;RPS27	PIN1;RPL9;RPL10;RPL10A;RPL23;RPL23A;RPL5;RPLP2;RPS12;RPS14;RPS13;RPS27
SYNGO:presyn_ATPmetabolic	J2	BP	ATP metabolic process in the presynapse	│ ├─ ATP metabolic process in the presynapse	SYNGO:metabolism			0	1
SYNGO:presyn_regulationATPmetabolic	J12	BP	regulation of ATP metabolic process in the presynapse	│ │ └─ regulation of ATP metabolic process in the presynapse	SYNGO:presyn_ATPmetabolic			0	1
SYNGO:postsyn_ATPmetabolic	J3	BP	ATP metabolic process in the postsynapse	│ ├─ ATP metabolic process in the postsynapse	SYNGO:metabolism			0	1
GO:0099546	J4	BP	protein catabolic process, modulating synaptic transmission	│ ├─ protein catabolic process, modulating synaptic transmission	SYNGO:metabolism			0	1
GO:0099574	J5	BP	regulation of protein catabolic process at synapse, modulating synaptic transmission	│ ├─ regulation of protein catabolic process at synapse, modulating synaptic transmission	SYNGO:metabolism			0	8
GO:0099576	J13	BP	regulation of protein catabolic process at postsynapse, modulating synaptic transmission	│ │ ├─ regulation of protein catabolic process at postsynapse, modulating synaptic transmission	GO:0099574			0	6
GO:0099575	J14	BP	regulation of protein catabolic process at presynapse, modulating synaptic transmission	│ │ └─ regulation of protein catabolic process at presynapse, modulating synaptic transmission	GO:0099574			0	1
GO:0099547	J6	BP	regulation of translation at synapse, modulating synaptic transmission	│ ├─ regulation of translation at synapse, modulating synaptic transmission	SYNGO:metabolism			0	7
GO:0099578	J15	BP	regulation of translation at postsynapse, modulating synaptic transmission	│ │ ├─ regulation of translation at postsynapse, modulating synaptic transmission	GO:0099547			0	3
GO:0099577	J16	BP	regulation of translation at presynapse, modulating synaptic transmission	│ │ └─ regulation of translation at presynapse, modulating synaptic transmission	GO:0099547			0	2
GO:0042135	J7	BP	neurotransmitter catabolic process	│ ├─ neurotransmitter catabolic process	SYNGO:metabolism			0	2
GO:0140246	J8	BP	protein catabolic process at synapse	│ ├─ protein catabolic process at synapse	SYNGO:metabolism			1	25	HGNC:8988	PIN1	PIN1
GO:0140247	J17	BP	protein catabolic process at presynapse	│ │ ├─ protein catabolic process at presynapse	GO:0140246			0	5
GO:0140251	J21	BP	regulation protein catabolic process at presynapse	│ │ │ └─ regulation protein catabolic process at presynapse	GO:0140247			0	4
GO:0140249	J18	BP	protein catabolic process at postsynapse	│ │ └─ protein catabolic process at postsynapse	GO:0140246			1	20	HGNC:8988	PIN1	PIN1
GO:0140252	J22	BP	regulation protein catabolic process at postsynapse	│ │ └─ regulation protein catabolic process at postsynapse	GO:0140249			1	15	HGNC:8988	PIN1	PIN1	PIN1
GO:0042136	J9	BP	neurotransmitter biosynthetic process	│ ├─ neurotransmitter biosynthetic process	SYNGO:metabolism			0	2
GO:0140241	J10	BP	translation at synapse	│ ├─ translation at synapse	SYNGO:metabolism	7.29283e-09		11	56	HGNC:10369;HGNC:10298;HGNC:10299;HGNC:10316;HGNC:10317;HGNC:10360;HGNC:10377;HGNC:10385;HGNC:10387;HGNC:10386;HGNC:10416	RPL9;RPL10;RPL10A;RPL23;RPL23A;RPL5;RPLP2;RPS12;RPS14;RPS13;RPS27	RPL9;RPL10;RPL10A;RPL23;RPL23A;RPL5;RPLP2;RPS12;RPS14;RPS13;RPS27
GO:0140236	J19	BP	translation at presynapse	│ │ ├─ translation at presynapse	GO:0140241	3.0932e-09	2.47456e-08	11	51	HGNC:10369;HGNC:10298;HGNC:10299;HGNC:10316;HGNC:10317;HGNC:10360;HGNC:10377;HGNC:10385;HGNC:10387;HGNC:10386;HGNC:10416	RPL9;RPL10;RPL10A;RPL23;RPL23A;RPL5;RPLP2;RPS12;RPS14;RPS13;RPS27	RPL9;RPL10;RPL10A;RPL23;RPL23A;RPL5;RPLP2;RPS12;RPS14;RPS13;RPS27	RPL9;RPL10;RPL10A;RPL23;RPL23A;RPL5;RPLP2;RPS12;RPS14;RPS13;RPS27
GO:0140242	J20	BP	translation at postsynapse	│ │ └─ translation at postsynapse	GO:0140241	7.29283e-09	3.88951e-08	11	56	HGNC:10369;HGNC:10298;HGNC:10299;HGNC:10316;HGNC:10317;HGNC:10360;HGNC:10377;HGNC:10385;HGNC:10387;HGNC:10386;HGNC:10416	RPL9;RPL10;RPL10A;RPL23;RPL23A;RPL5;RPLP2;RPS12;RPS14;RPS13;RPS27	RPL9;RPL10;RPL10A;RPL23;RPL23A;RPL5;RPLP2;RPS12;RPS14;RPS13;RPS27	RPL9;RPL10;RPL10A;RPL23;RPL23A;RPL5;RPLP2;RPS12;RPS14;RPS13;RPS27
GO:0140245	J23	BP	regulation of translation at postsynapse	│ │ └─ regulation of translation at postsynapse	GO:0140242			0	4
GO:0140235	J11	BP	RNA polyadenylation at postsynapse	│ └─ RNA polyadenylation at postsynapse	SYNGO:metabolism			0	1
SYNGO:transport	K1	BP	transport	└─ transport	SYNGO:synprocess			2	54	HGNC:6320;HGNC:5048	KIF3B;HNRNPU	KIF3B;HNRNPU
GO:0008088	K2	BP	axo-dendritic transport	├─ axo-dendritic transport	SYNGO:transport			2	28	HGNC:6320;HGNC:5048	KIF3B;HNRNPU	KIF3B;HNRNPU
GO:0098930	K7	BP	axonal transport	│ ├─ axonal transport	GO:0008088			0	10
GO:0008089	K14	BP	anterograde axonal transport	│ │ ├─ anterograde axonal transport	GO:0098930			0	6
GO:0099641	K23	BP	anterograde axonal protein transport	│ │ │ ├─ anterograde axonal protein transport	GO:0008089			0	2
GO:0140231	K24	BP	anterograde axonal transport of neurotransmitter receptor complex	│ │ │ └─ anterograde axonal transport of neurotransmitter receptor complex	GO:0008089			0	1
GO:0099088	K15	BP	axonal transport of messenger ribonucleoprotein complex	│ │ └─ axonal transport of messenger ribonucleoprotein complex	GO:0098930			0	1
GO:0098935	K8	BP	dendritic transport	│ └─ dendritic transport	GO:0008088			2	19	HGNC:6320;HGNC:5048	KIF3B;HNRNPU	KIF3B;HNRNPU
GO:0098937	K16	BP	anterograde dendritic transport	│ ├─ anterograde dendritic transport	GO:0098935			1	9	HGNC:6320	KIF3B	KIF3B
GO:0098971	K25	BP	anterograde dendritic transport of neurotransmitter receptor complex	│ │ └─ anterograde dendritic transport of neurotransmitter receptor complex	GO:0098937			1	6	HGNC:6320	KIF3B	KIF3B	KIF3B
GO:0098939	K17	BP	dendritic transport of mitochondrion	│ ├─ dendritic transport of mitochondrion	GO:0098935			0	1
GO:0098961	K18	BP	dendritic transport of ribonucleoprotein complex	│ ├─ dendritic transport of ribonucleoprotein complex	GO:0098935			1	6	HGNC:5048	HNRNPU	HNRNPU
GO:0098963	K26	BP	dendritic transport of messenger ribonucleoprotein complex	│ │ └─ dendritic transport of messenger ribonucleoprotein complex	GO:0098961			1	6	HGNC:5048	HNRNPU	HNRNPU	HNRNPU
GO:0098964	K29	BP	anterograde dendritic transport of messenger ribonucleoprotein complex	│ │ └─ anterograde dendritic transport of messenger ribonucleoprotein complex	GO:0098963			0	2
GO:0098934	K19	BP	retrograde dendritic transport	│ └─ retrograde dendritic transport	GO:0098935			0	1
GO:0099514	K3	BP	synaptic vesicle cytoskeletal transport	├─ synaptic vesicle cytoskeletal transport	SYNGO:transport			0	4
GO:0099517	K9	BP	synaptic vesicle transport along microtubule	│ └─ synaptic vesicle transport along microtubule	GO:0099514			0	4
GO:0048490	K20	BP	anterograde synaptic vesicle transport	│ └─ anterograde synaptic vesicle transport	GO:0099517			0	4
GO:1903742	K27	BP	regulation of anterograde synaptic vesicle transport	│ └─ regulation of anterograde synaptic vesicle transport	GO:0048490			0	2
GO:0099090	K4	BP	synaptic vesicle recycling via endosome	├─ synaptic vesicle recycling via endosome	SYNGO:transport			0	3
GO:0099158	K10	BP	regulation of recycling endosome localization within postsynapse	│ └─ regulation of recycling endosome localization within postsynapse	GO:0099090			0	1
GO:0099089	K5	BP	establishment of endoplasmic reticulum localization to postsynapse	├─ establishment of endoplasmic reticulum localization to postsynapse	SYNGO:transport			0	1
GO:0099637	K6	BP	neurotransmitter receptor transport	└─ neurotransmitter receptor transport	SYNGO:transport			0	19
GO:0098968	K11	BP	neurotransmitter receptor transport postsynaptic membrane to endosome	├─ neurotransmitter receptor transport postsynaptic membrane to endosome	GO:0099637			0	2
GO:0098877	K12	BP	neurotransmitter receptor transport to plasma membrane	├─ neurotransmitter receptor transport to plasma membrane	GO:0099637			0	15
GO:0098969	K21	BP	neurotransmitter receptor transport to postsynaptic membrane	│ ├─ neurotransmitter receptor transport to postsynaptic membrane	GO:0098877			0	5
GO:0099639	K22	BP	neurotransmitter receptor transport, endosome to plasma membrane	│ └─ neurotransmitter receptor transport, endosome to plasma membrane	GO:0098877			0	11
GO:0098887	K28	BP	neurotransmitter receptor transport, endosome to postsynaptic membrane	│ └─ neurotransmitter receptor transport, endosome to postsynaptic membrane	GO:0099639			0	10
GO:0099152	K30	BP	regulation of neurotransmitter receptor transport, endosome to postsynaptic membrane	│ └─ regulation of neurotransmitter receptor transport, endosome to postsynaptic membrane	GO:0098887			0	2
GO:0098943	K13	BP	neurotransmitter receptor transport, postsynaptic endosome to lysosome	└─ neurotransmitter receptor transport, postsynaptic endosome to lysosome	GO:0099637			0	2

## Sheet: Sheet2
your genelist input	gene hgnc_id	gene symbol	gene name	gene synonyms
ACTBL2	HGNC:17780	ACTBL2	actin beta like 2	DKFZP686D0972
ACTR2	HGNC:169	ACTR2	actin related protein 2
ALDOC	HGNC:418	ALDOC	aldolase, fructose-bisphosphate C
ARHGDIA	HGNC:678	ARHGDIA	Rho GDP dissociation inhibitor alpha	RHOGDI,GDIA1
ATP2B2	HGNC:815	ATP2B2	ATPase plasma membrane Ca2+ transporting 2	PMCA2
CAMK4	HGNC:1464	CAMK4	calcium/calmodulin dependent protein kinase IV	CAMK-GR,CAMKIV
CASP3	HGNC:1504	CASP3	caspase 3	CPP32,CPP32B,YAMA,APOPAIN
CFL1	HGNC:1874	CFL1	cofilin 1	CFL
CPEB4	HGNC:21747	CPEB4	cytoplasmic polyadenylation element binding protein 4	KIAA1673
CRMP1	HGNC:2365	CRMP1	collapsin response mediator protein 1	DPYSL1
CXADR	HGNC:2559	CXADR	CXADR Ig-like cell adhesion molecule
DBN1	HGNC:2695	DBN1	drebrin 1	D0S117E
DCLK1	HGNC:2700	DCLK1	doublecortin like kinase 1	KIAA0369,DCLK,DCDC3A,DCAMKL1
DLG4	HGNC:2903	DLG4	discs large MAGUK scaffold protein 4	PSD-95,PSD95,SAP90,SAP-90
DPYSL3	HGNC:3015	DPYSL3	dihydropyrimidinase like 3	DRP-3,ULIP,CRMP4
DPYSL5	HGNC:20637	DPYSL5	dihydropyrimidinase like 5	CRMP5,ULIP6,CRMP-5,CRAM
EIF2S2	HGNC:3266	EIF2S2	eukaryotic translation initiation factor 2 subunit beta	EIF2BETA,PPP1R67
EIF4B	HGNC:3285	EIF4B	eukaryotic translation initiation factor 4B
EIF4G1	HGNC:3296	EIF4G1	eukaryotic translation initiation factor 4 gamma 1	PARK18,EIF4G
EIF5	HGNC:3299	EIF5	eukaryotic translation initiation factor 5
EIF6	HGNC:6159	EIF6	eukaryotic translation initiation factor 6	P27BBP,B(2)GCN,ITGB4BP
ERC1	HGNC:17072	ERC1	ELKS/RAB6-interacting/CAST family member 1	ELKS,KIAA1081,CAST2,MGC12974,RAB6IP2
FABP5	HGNC:3560	FABP5	fatty acid binding protein 5	E-FABP,PA-FABP,KFABP
GAP43	HGNC:4140	GAP43	growth associated protein 43	B-50,PP46,GAP-43
GDI1	HGNC:4226	GDI1	GDP dissociation inhibitor 1	RABGDIA,XAP-4,OPHN2,FLJ41411,MRX48,MRX41,GDIL
GIPC1	HGNC:1226	GIPC1	GIPC PDZ domain containing family member 1	TIP-2,HS.6454,GIPC,SEMCAP,GLUT1CBP,SYNECTIN,C19ORF3,RGS19IP1
GSK3B	HGNC:4617	GSK3B	glycogen synthase kinase 3 beta
HABP4	HGNC:17062	HABP4	hyaluronan binding protein 4	IHABP4,SERBP1L
HNRNPA0	HGNC:5030	HNRNPA0	heterogeneous nuclear ribonucleoprotein A0	HNRPA0
HNRNPA1	HGNC:5031	HNRNPA1	heterogeneous nuclear ribonucleoprotein A1	HNRNP-A1,ALS20,HNRPA1
HNRNPD	HGNC:5036	HNRNPD	heterogeneous nuclear ribonucleoprotein D	AUF1,HNRPD
HNRNPDL	HGNC:5037	HNRNPDL	heterogeneous nuclear ribonucleoprotein D like	JKTBP,LAAUF1,HNRPDL,LGMD1G
HNRNPF	HGNC:5039	HNRNPF	heterogeneous nuclear ribonucleoprotein F	HNRPF
HNRNPH2	HGNC:5042	HNRNPH2	heterogeneous nuclear ribonucleoprotein H2	HNRNPH',FTP3,HNRPH',HNRPH2
HNRNPK	HGNC:5044	HNRNPK	heterogeneous nuclear ribonucleoprotein K	CSBP,TUNP,HNRPK
HNRNPL	HGNC:5045	HNRNPL	heterogeneous nuclear ribonucleoprotein L	HNRPL
HNRNPLL	HGNC:25127	HNRNPLL	heterogeneous nuclear ribonucleoprotein L like	HNRPLL
HNRNPU	HGNC:5048	HNRNPU	heterogeneous nuclear ribonucleoprotein U	SAF-A,FLJ37978,FLJ30202,HNRPU,HNRNPU-AS1,C1ORF199,NCRNA00201
HSPA8	HGNC:5241	HSPA8	heat shock protein family A (Hsp70) member 8	HSC71,HSC70,HSP73,HSPA10
KIF3B	HGNC:6320	KIF3B	kinesin family member 3B	KIAA0359,FLA8,KLP-11
L1CAM	HGNC:6470	L1CAM	L1 cell adhesion molecule	CD171,NCAM-L1,CAML1,HSAS1,SPG1,HSAS,MIC5
MAP2	HGNC:6839	MAP2	microtubule associated protein 2	MAP2A,MAP2B,MAP2C
MARCKS	HGNC:6759	MARCKS	myristoylated alanine rich protein kinase C substrate	PKCSL,80K-L,MACS
MARCKSL1	HGNC:7142	MARCKSL1	MARCKS like 1	F52,MACMARCKS
NCAM1	HGNC:7656	NCAM1	neural cell adhesion molecule 1	NCAM,CD56
NEDD8	HGNC:7732	NEDD8	NEDD8 ubiquitin like modifier	NEDD-8
NRCAM	HGNC:7994	NRCAM	neuronal cell adhesion molecule	KIAA0343,BRAVO
NTRK2	HGNC:8032	NTRK2	neurotrophic receptor tyrosine kinase 2	TRKB
PABPC1	HGNC:8554	PABPC1	poly(A) binding protein cytoplasmic 1	PAB1,PABPC2
PI4K2A	HGNC:30031	PI4K2A	phosphatidylinositol 4-kinase type 2 alpha	PI4KII,DKFZP761G1923,PIK42A
PIN1	HGNC:8988	PIN1	peptidylprolyl cis/trans isomerase, NIMA-interacting 1	DOD
PPP3CB	HGNC:9315	PPP3CB	protein phosphatase 3 catalytic subunit beta	CALNA2,PP2BBETA,CALNB
PTN	HGNC:9630	PTN	pleiotrophin	HBNF,HBGF8,NEGF1
QKI	HGNC:21100	QKI	QKI, KH domain containing RNA binding	QK3
RAB3C	HGNC:30269	RAB3C	RAB3C, member RAS oncogene family
RAP1B	HGNC:9857	RAP1B	RAP1B, member of RAS oncogene family	RAL1B,DKFZP586H0723
RDX	HGNC:9944	RDX	radixin	DFNB24
RPL10	HGNC:10298	RPL10	ribosomal protein L10	QM,DXS648,FLJ23544,L10,UL16
RPL10A	HGNC:10299	RPL10A	ribosomal protein L10a	CSA-19,L10A,UL1,NEDD6
RPL23	HGNC:10316	RPL23	ribosomal protein L23	L23,UL14
RPL23A	HGNC:10317	RPL23A	ribosomal protein L23a	L23A,UL23
RPL5	HGNC:10360	RPL5	ribosomal protein L5	PPP1R135,UL18
RPL9	HGNC:10369	RPL9	ribosomal protein L9	UL6
RPLP2	HGNC:10377	RPLP2	ribosomal protein lateral stalk subunit P2	MGC71408,LP2,D11S2243E
RPS12	HGNC:10385	RPS12	ribosomal protein S12	ES12
RPS13	HGNC:10386	RPS13	ribosomal protein S13	US15
RPS14	HGNC:10387	RPS14	ribosomal protein S14	EMTB,US11
RPS17	HGNC:10397	RPS17	ribosomal protein S17	MGC72007,S17,ES17,RPS17L
RPS19	HGNC:10402	RPS19	ribosomal protein S19	S19,ES19,DBA,LOH19CR1
RPS21	HGNC:10409	RPS21	ribosomal protein S21	S21,ES21
RPS25	HGNC:10413	RPS25	ribosomal protein S25	S25,ES25
RPS27	HGNC:10416	RPS27	ribosomal protein S27	MPS-1,S27,ES27
RPS3A	HGNC:10421	RPS3A	ribosomal protein S3A	S3A,MFTL
SARM1	HGNC:17074	SARM1	sterile alpha and TIR motif containing 1	SARM,SAMD2,KIAA0524
SCRN1	HGNC:22192	SCRN1	secernin 1	KIAA0193
SEPTIN2	HGNC:7729	SEPTIN2	septin 2	KIAA0158,HNEDD5,SEPTIN-2,NEDD5
SGTA	HGNC:10819	SGTA	small glutamine rich tetratricopeptide repeat co-chaperone alpha	UBP,VPU,HSGT,ALPHASGT,SGT
SLC16A7	HGNC:10928	SLC16A7	solute carrier family 16 member 7	MCT2
SNAP29	HGNC:11133	SNAP29	synaptosome associated protein 29	SNAP-29,CEDNIK
SNAP47	HGNC:30669	SNAP47	synaptosome associated protein 47	SVAP1,SNAP-47,C1ORF142
SQSTM1	HGNC:11280	SQSTM1	sequestosome 1	P62B,A170,PDB3,OSIL
SRGAP2	HGNC:19751	SRGAP2	SLIT-ROBO Rho GTPase activating protein 2	KIAA0456,ARHGAP34,SRGAP2A,FNBP2
SUMO2	HGNC:11125	SUMO2	small ubiquitin like modifier 2	SMT3B,SMT3H2
SYNCRIP	HGNC:16918	SYNCRIP	synaptotagmin binding cytoplasmic RNA interacting protein	NSAP1,GRY-RBP,DJ3J17.2,HNRPQ1,HNRNP-Q,HNRNPQ
TNC	HGNC:5318	TNC	tenascin C	MGC167029,HXB,DFNA56
TNIK	HGNC:30765	TNIK	TRAF2 and NCK interacting kinase	KIAA0551
TPD52	HGNC:12005	TPD52	tumor protein D52	D52,HD52,N8L
TUBB2B	HGNC:30829	TUBB2B	tubulin beta 2B class IIb	MGC8685,DKFZP566F223,BA506K6.1
VCP	HGNC:12666	VCP	valosin containing protein	IBMPFD,CDC48
YWHAG	HGNC:12852	YWHAG	tyrosine 3-monooxygenase/tryptophan 5-monooxygenase activation protein gamma	PPP1R170,14-3-3GAMMA,14-3-3Y
ABCD2
ACAT1
ACSBG1
AK2
ANKIB1
ANKRD13D
APPL2
ARCN1
ARFGAP2
ARMC6
ARSB
ATAD3
ATG4B
ATXN10
BABAM2
BCKDHB
BDH1
BOLA2
BSG
BTF3
BTF3L4
BUB3
BUD31
CALU
CBS
CBX3
CC2D1B
CCAR1
CCDC22
CDC37
CDKN1B
CELF2
CIAPIN1
CKAP4
CLIP1
CLIP2
CMAS
CMPK1
COA7
COMMD2
COMMD9
COPS7B
CSDE1
CUSTOS
CZIB
DCAKD
DPY30
DPYSL4
EDF1
EEF1B
EIF2S3X
EIF3G
EIF3J2
EIF4H
ENY2
FABP7
FAM49A
FARSB
FAU
FDXR
FKBP3
FNBP1
FSCN1
G3BP2
GADD45GIP1
GATM
GDAP1
GGA1
GLG1
GLRX5
GOLGA3
GPRIN1
GPRIN3
HCCS
HDAC4
HECTD3
HMGCS1
HMGN3
HMGN5
HSPA4
IGLON5
IRGQ
ISCA2
KHDRBS1
KHSRP
KIF3C
LAMTOR1
LIPE
LNPK
LRRC59
LYSMD1
LZIC
MAPRE1
MAPT
MATN4
MECR
MFF
MIA3
MMAA
MMS19
MPC1
MPST
MRPL12
MRPL39
MRPL40
MRPL47
MRPS5
MT2
MVD
MYEF2
MYO18A
NAA25
NAV1
NDRG4
NPLOC4
NPM1
NUDC
OGFR
OXA1L
OXCT1
PABPN1
PCNP
PDAP1
PGAM5
PGBD5
PGLS
PITPNC1
PLGRKT
PLXDC2
PPP6R1
PRDX2
PRUNE1
PSMC2
PSMC3
PSMC4
PSMD1
PSMD4
PSMD6
PSPC1
PTMA
PURB
RAMAC
RAP1GAP
RBM10
REEP2
RNF114
RNF14
RUFY3
SAFB
SARNP
SARS
SDHA
SEC62
SEC63
SERBP1
SESTD1
SF1
SF3A1
SH3GLB1
SLC25A1
SLC25A22
SLC27A4
SLC39A6
SMAP
SMU1
SND1
SNRPA
SNRPB2
SNX3
SPAG9
SPHKAP
SRP14
SRP54
SRP68
SRSF4
ST13
STRAP
TBC1D13
TDRKH
THRAP3
TKFC
TMCO1
TMED10
TMEM38A
TMSB10
TRA2A
TRIM28
TSG101
TTC9
TTLL12
TTYH3
TUBB2A
TXNDC17
UBE2O
UFM1
VCAM1
ZNF638
ZNRD2
ZRANB2
