# Supplementary material for: Autophagy controls the hippocampal postsynaptic organization and affects cognition in a mouse model of Fragile X syndrome
Source: Research Square preprint supplement (doi:10.21203/rs.3.rs-4415392/v1), 2025-08-27
Supplement: Supplementary file 7 [file a3265fd3b1f9b52c9d7503f8.xlsx]

## Sheet: Sheet1
description	access.ID	gene.ID
26S proteasome regulatory subunit 6A	O88685	Psmc3
Fructose-bisphosphate aldolase C	P05063	Aldoc
Cold shock domain-containing protein E1	Q91W50	Csde1
CXXC motif containing zinc binding protein	Q8BHG2	Czib
DCC-interacting protein 13-beta	Q8K3G9	Appl2
Hydroxymethylglutaryl-CoA synthase| cytoplasmic	Q8JZK9	Hmgcs1
Staphylococcal nuclease domain-containing protein 1	Q78PY7	Snd1
Plasma membrane calcium-transporting ATPase 2	Q9R0K7	Atp2b2
Septin-2	P42208	Septin2
Phenylalanine--tRNA ligase beta subunit	Q9WUA2	Farsb
Serine-threonine kinase receptor-associated protein	Q9Z1Z2	Strap
Transitional endoplasmic reticulum ATPase	Q01853	Vcp
BDNF/NT-3 growth factors receptor	P15209	Ntrk2
26S proteasome regulatory subunit 7	P46471	Psmc2
26S proteasome non-ATPase regulatory subunit 1	Q3TXS7	Psmd1
Golgi apparatus protein 1	Q61543	Glg1
Calcium/calmodulin-dependent protein kinase type IV	P08414	Camk4
Heterogeneous nuclear ribonucleoprotein U	Q8VEK3	Hnrnpu
Drebrin	Q9QXS6	Dbn1
Heterogeneous nuclear ribonucleoprotein L-like	Q921F4	Hnrnpll
ADP-ribosylation factor-binding protein GGA1	Q8R0H9	Gga1
Transport and Golgi organization protein 1 homolog	Q8BI84	Mia3
Transformer-2 protein homolog alpha	Q6PFR5	Tra2a
Rap1 GTPase-activating protein 1	A2ALS5	Rap1gap
Heterogeneous nuclear ribonucleoprotein K	P61979	Hnrnpk
Eukaryotic translation initiation factor 2 subunit 2	Q99L45	Eif2s2
(E3-independent) E2 ubiquitin-conjugating enzyme UBE2O	Q6ZPJ3	Ube2o
Synaptosomal-associated protein 47	Q8R570	Snap47
Tumor protein D52	Q62393	Tpd52
Hsc70-interacting protein	Q99L47	St13
WD40 repeat-containing protein SMU1	Q3UKJ7	Smu1
Arylsulfatase B	P50429	Arsb
26S proteasome non-ATPase regulatory subunit 6	Q99JI4	Psmd6
Ganglioside-induced differentiation-associated protein 1	O88741	Gdap1
Polyadenylate-binding protein 2	Q8CCS6	Pabpn1
60S ribosomal protein L9	P51410	Rpl9
N-alpha-acetyltransferase 25| NatB auxiliary subunit	Q8BWZ3	Naa25
Heat shock 70 kDa protein 4	Q61316	Hspa4
Rab GDP dissociation inhibitor alpha	P50396	Gdi1
CAP-Gly domain-containing linker protein 2	Q9Z0H8	Clip2
Exopolyphosphatase PRUNE1	Q8BIW1	Prune1
Transcription intermediary factor 1-beta	Q62318	Trim28
Protein RUFY3	Q9D394	Rufy3
Translocation protein SEC63 homolog	Q8VHE0	Sec63
Neural cell adhesion molecule L1	P11627	L1cam
Unconventional myosin-XVIIIa	Q9JMH9	Myo18a
Eukaryotic translation initiation factor 2 subunit 3| X-linked	Q9Z0N1	Eif2s3x
SEC14 domain and spectrin repeat-containing protein 1	Q80UK0	Sestd1
Nuclear migration protein nudC	O35685	Nudc
Ataxin-10	P28658	Atxn10
NADPH:adrenodoxin oxidoreductase| mitochondrial	Q61578	Fdxr
Splicing factor 3A subunit 1	Q8K4Z5	Sf3a1
Glycogen synthase kinase-3 beta	Q9WV60	Gsk3b
ADP-ribosylation factor GTPase-activating protein 2	Q99K28	Arfgap2
39S ribosomal protein L39| mitochondrial	Q9JKF7	Mrpl39
Transcription factor BTF3	Q64152	Btf3
Radixin	P26043	Rdx
Hsp90 co-chaperone Cdc37	Q61081	Cdc37
Myelin expression factor 2	Q8C854	Myef2
Scaffold attachment factor B1	D3YXK2	Safb
60S ribosomal protein L23	P62830	Rpl23
Cytoplasmic phosphatidylinositol transfer protein 1	Q8K4R4	Pitpnc1
Eukaryotic translation initiation factor 4 gamma 1	Q6NZJ6	Eif4g1
Fascin	Q61553	Fscn1
Triokinase/FMN cyclase	Q8VC30	Tkfc
Serine--tRNA ligase| cytoplasmic	P26638	Sars
Eukaryotic translation initiation factor 5	P59325	Eif5
Tudor and KH domain-containing protein	Q80VL1	Tdrkh
Thyroid hormone receptor-associated protein 3	Q569Z6	Thrap3
Tubulin--tyrosine ligase-like protein 12	Q3UDE2	Ttll12
26S proteasome regulatory subunit 6B	P54775	Psmc4
PiggyBac transposable element-derived protein 5	D3YZI9	Pgbd5
Heterogeneous nuclear ribonucleoprotein Q	Q7TMK9	Syncrip
Cofilin-1	P18760	Cfl1
40S ribosomal protein S13	P62301	Rps13
Transmembrane emp24 domain-containing protein 10	Q9D1D4	Tmed10
Zinc transporter ZIP6	Q8C145	Slc39a6
NEDD8	P29595	Nedd8
Neural cell adhesion molecule 1	P13595	Ncam1
Ubiquitin-fold modifier 1	P61961	Ufm1
Sorting nexin-3	O70492	Snx3
Endoplasmic reticulum junction formation protein lunapark	Q7TQ95	Lnpk
Protein dpy-30 homolog	Q99LT0	Dpy30
40S ribosomal protein S17	P63276	Rps17
Zinc finger Ran-binding domain-containing protein 2	Q9R020	Zranb2
C-Jun-amino-terminal kinase-interacting protein 4	Q58A65	Spag9
Heterogeneous nuclear ribonucleoprotein H2	P70333	Hnrnph2
ATPase family AAA domain-containing protein 3	Q925I1	Atad3
Vascular cell adhesion protein 1	P29533	Vcam1
Eukaryotic translation initiation factor 6	O55135	Eif6
Metallothionein-2	P02798	Mt2
Small glutamine-rich tetratricopeptide repeat-containing protein alpha	Q8BJU0	Sgta
CAP-Gly domain-containing linker protein 1	Q922J3	Clip1
Calcium load-activated calcium channel	Q921L3	Tmco1
Signal recognition particle 14 kDa protein	P16254	Srp14
Actin-related protein 2	P61161	Actr2
14-3-3 protein gamma	P61982	Ywhag
Cell division cycle and apoptosis regulator protein 1	Q8CH18	Ccar1
Sterile alpha and TIR motif-containing protein 1	Q6PDS3	Sarm1
Matrilin-4	O89029	Matn4
Enoyl-[acyl-carrier-protein] reductase| mitochondrial	Q9DCS3	Mecr
Small acidic protein	Q9R0P4	Smap
Mitotic checkpoint protein BUB3	Q9WVA3	Bub3
Formin-binding protein 1	Q80TY0	Fnbp1
Iron-sulfur cluster assembly 2 homolog| mitochondrial	Q9DCB8	Isca2
Secernin-1	Q9CZC8	Scrn1
Cytochrome c oxidase assembly factor 7	Q921H9	Coa7
Long-chain-fatty-acid--CoA ligase ACSBG1	Q99PU5	Acsbg1
Coatomer subunit delta	Q5XJY5	Arcn1
Cytochrome c-type heme lyase	P53702	Hccs
Protein NDRG4	Q8BTG7	Ndrg4
Eukaryotic translation initiation factor 3 subunit G	Q9Z1D1	Eif3g
40S ribosomal protein S12	P63323	Rps12
Heterogeneous nuclear ribonucleoprotein L	Q8R081	Hnrnpl
Protein BUD31 homolog	Q6PGH1	Bud31
60S ribosomal protein L10a	P53026	Rpl10a
6-phosphogluconolactonase	Q9CQ60	Pgls
SLIT-ROBO Rho GTPase-activating protein 2	Q91Z67	Srgap2
Succinate dehydrogenase [ubiquinone] flavoprotein subunit| mitochondrial	Q8K2B3	Sdha
Long-chain fatty acid transport protein 4	Q91VE0	Slc27a4
Eukaryotic translation initiation factor 4H	Q9WUK2	Eif4h
N-acylneuraminate cytidylyltransferase	Q99KK2	Cmas
Chromobox protein homolog 3	P23198	Cbx3
Intracellular hyaluronan-binding protein 4	Q9JKS5	Habp4
Polyadenylate-binding protein 1	P29341	Pabpc1
Acetyl-CoA acetyltransferase| mitochondrial	Q8QZT1	Acat1
40S ribosomal protein S14	P62264	Rps14
Anamorsin	Q8WTY4	Ciapin1
Peroxiredoxin-2	Q61171	Prdx2
PEST proteolytic signal-containing nuclear protein	Q6P8I4	Pcnp
Serine/threonine-protein kinase DCLK1	Q9JLM8	Dclk1
Diphosphomevalonate decarboxylase	Q99JF5	Mvd
Dephospho-CoA kinase domain-containing protein	Q8BHC4	Dcakd
40S ribosomal protein S25	P62852	Rps25
Endophilin-B1	Q9JK48	Sh3glb1
Heterogeneous nuclear ribonucleoprotein F	Q9Z2X1	Hnrnpf
Endothelial differentiation-related factor 1	Q9JMG1	Edf1
Dihydropyrimidinase-related protein 1	P97427	Crmp1
Paraspeckle component 1	Q8R326	Pspc1
Microtubule-associated protein tau	P10637	Mapt
Protein quaking	Q9QYS9	Qki
Kinesin-like protein KIF3B	Q61771	Kif3b
Heterogeneous nuclear ribonucleoprotein D0	Q60668	Hnrnpd
Ras-related protein Rap-1b	Q99JI6	Rap1b
Cytoplasmic polyadenylation element-binding protein 4	Q7TN98	Cpeb4
Traf2 and NCK-interacting protein kinase	P83510	Tnik
Signal recognition particle 54 kDa protein	P14576	Srp54
Armadillo repeat-containing protein 6	Q8BNU0	Armc6
3-mercaptopyruvate sulfurtransferase	Q99J99	Mpst
Serine/threonine-protein phosphatase 2B catalytic subunit beta isoform	P48453	Ppp3cb
Thioredoxin domain-containing protein 17	Q9CQM5	Txndc17
40S ribosomal protein S21	Q9CQR2	Rps21
Calumenin	O35887	Calu
Histone deacetylase 4	Q6NZM9	Hdac4
40S ribosomal protein S19	Q9CZX8	Rps19
SAP domain-containing ribonucleoprotein	Q9D1J3	Sarnp
Heterogeneous nuclear ribonucleoprotein D-like	Q9Z130	Hnrnpdl
Cysteine protease ATG4B	Q8BGE6	Atg4b
Phosphatidylinositol 4-kinase type 2-alpha	Q2TBE6	Pi4k2a
60S acidic ribosomal protein P2	P99027	Rplp2
Protein ZNRD2	P56873	Znrd2
2-oxoisovalerate dehydrogenase subunit beta| mitochondrial	Q6P3A8	Bckdhb
Immunity-related GTPase family Q protein	Q8VIM9	Irgq
CUGBP Elav-like family member 2	Q9Z0H4	Celf2
Plasminogen activator inhibitor 1 RNA-binding protein	Q9CY58	Serbp1
Microtubule-associated protein RP/EB family member 1	Q61166	Mapre1
Far upstream element-binding protein 2	Q3U0V1	Khsrp
Tumor susceptibility gene 101 protein	Q61187	Tsg101
Golgin subfamily A member 3	P55937	Golga3
26S proteasome non-ATPase regulatory subunit 4	O35226	Psmd4
Mitochondrial glutamate carrier 1	Q9D6M3	Slc25a22
Prothymosin alpha	P26350	Ptma
Small ubiquitin-related modifier 2	P61957	Sumo2
Protein FAM49A	Q8BHZ0	Fam49a
Elongation factor 1-beta	O70251	Eef1b
Cyclin-dependent kinase inhibitor 1B	P46414	Cdkn1b
Peptidyl-prolyl cis-trans isomerase FKBP3	Q62446	Fkbp3
Heterogeneous nuclear ribonucleoprotein A1	P49312	Hnrnpa1
Coiled-coil and C2 domain-containing protein 1B	Q8BRN9	Cc2d1b
COMM domain-containing protein 2	Q8BXC6	Commd2
U2 small nuclear ribonucleoprotein B''	Q9CQI7	Snrpb2
Nuclear protein localization protein 4 homolog	P60670	Nploc4
60S ribosomal protein L23a	P62751	Rpl23a
Microtubule-associated protein 2	P20357	Map2
Cytoskeleton-associated protein 4	Q8BMK4	Ckap4
60S ribosomal protein L5	P47962	Rpl5
LysM and putative peptidoglycan-binding domain-containing protein 1	Q9D0E3	Lysmd1
Dihydropyrimidinase-related protein 4	O35098	Dpysl4
Glycine amidinotransferase| mitochondrial	Q9D964	Gatm
A-kinase anchor protein SPHKAP	Q6NSW3	Sphkap
Transcription factor BTF3 homolog 4	Q9CQH7	Btf3l4
Glutaredoxin-related protein 5| mitochondrial	Q80Y14	Glrx5
E3 ubiquitin-protein ligase HECTD3	Q3U487	Hectd3
Heterogeneous nuclear ribonucleoprotein A0	Q9CX86	Hnrnpa0
Ragulator complex protein LAMTOR1	Q9CQ22	Lamtor1
28 kDa heat- and acid-stable phosphoprotein	Q3UHX2	Pdap1
28S ribosomal protein S5| mitochondrial	Q99N87	Mrps5
Eukaryotic translation initiation factor 4B	Q8BGD9	Eif4b
UMP-CMP kinase	Q9DBP5	Cmpk1
Eukaryotic translation initiation factor 3 subunit J-B	Q66JS6	Eif3j2
Peptidyl-prolyl cis-trans isomerase NIMA-interacting 1	Q9QUR7	Pin1
Caspase-3	P70677	Casp3
39S ribosomal protein L12| mitochondrial	Q9DB15	Mrpl12
RNA-binding protein 10	Q99KG3	Rbm10
High mobility group nucleosome-binding domain-containing protein 3	Q9DCB1	Hmgn3
40S ribosomal protein S3a	P97351	Rps3a
Receptor expression-enhancing protein 2	Q8VCD6	Reep2
Protein tweety homolog 3	Q6P5F7	Ttyh3
60S ribosomal protein L10	Q6ZWV3	Rpl10
Mitochondrial fission factor	Q6PCP5	Mff
E3 ubiquitin-protein ligase RNF14	Q9JI90	Rnf14
Tubulin beta-2A chain	Q7TMM9	Tubb2a
Heat shock cognate 71 kDa protein	P63017	Hspa8
Leucine-rich repeat-containing protein 59	Q922Q8	Lrrc59
Nucleophosmin	Q61937	Npm1
Succinyl-CoA:3-ketoacid coenzyme A transferase 1| mitochondrial	Q9D0K2	Oxct1
U1 small nuclear ribonucleoprotein A	Q62189	Snrpa
Rho GDP-dissociation inhibitor 1	Q99PT1	Arhgdia
Signal recognition particle subunit SRP68	Q8BMA6	Srp68
Tricarboxylate transport protein| mitochondrial	Q8JZU2	Slc25a1
G protein-regulated inducer of neurite outgrowth 1	Q3UNH4	Gprin1
G protein-regulated inducer of neurite outgrowth 3	Q8BWS5	Gprin3
Adenylate kinase 2| mitochondrial	Q9WTP6	Ak2
40S ribosomal protein S27	Q6ZWU9	Rps27
Coiled-coil domain-containing protein 22	Q9JIG7	Ccdc22
ELKS/Rab6-interacting/CAST family member 1	Q99MI1	Erc1
KH domain-containing| RNA-binding| signal transduction-associated protein 1	Q60749	Khdrbs1
Serine/arginine-rich splicing factor 4	Q8VE97	Srsf4
TBC1 domain family member 13	Q8R3D1	Tbc1d13
Disks large homolog 4	Q62108	Dlg4
Coxsackievirus and adenovirus receptor homolog	P97792	Cxadr
Tetratricopeptide repeat protein 9A	Q3V038	Ttc9
Ras GTPase-activating protein-binding protein 2	P97379	G3bp2
Transcription and mRNA export factor ENY2	Q9JIX0	Eny2
MMS19 nucleotide excision repair protein homolog	Q9D071	Mms19
Zinc finger protein 638	Q61464	Znf638
Neuronal cell adhesion molecule	Q810U4	Nrcam
Cystathionine beta-synthase	Q91WT9	Cbs
Ras-related protein Rab-3C	P62823	Rab3c
Splicing factor 1	Q64213	Sf1
COP9 signalosome complex subunit 7b	Q8BV13	Cops7b
Protein LZIC	Q8K3C3	Lzic
Trimeric intracellular cation channel type A	Q3TMP8	Tmem38a
39S ribosomal protein L40| mitochondrial	Q9Z2Q5	Mrpl40
Opioid growth factor receptor	Q99PG2	Ogfr
PDZ domain-containing protein GIPC1	Q9Z0G0	Gipc1
Basigin	P18572	Bsg
Serine/threonine-protein phosphatase 6 regulatory subunit 1	Q7TSI3	Ppp6r1
BolA-like protein 2	Q8BGS2	Bola2
Serine/threonine-protein phosphatase PGAM5| mitochondrial	Q8BX10	Pgam5
Mitochondrial pyruvate carrier 1	P63030	Mpc1
Growth arrest and DNA damage-inducible proteins-interacting protein 1	Q9CR59	Gadd45gip1
Neuron navigator 1	Q8CH77	Nav1
Sequestosome-1	Q64337	Sqstm1
BRISC and BRCA1-A complex member 2	Q8K3W0	Babam2
Synaptosomal-associated protein 29	Q9ERB0	Snap29
D-beta-hydroxybutyrate dehydrogenase| mitochondrial	Q80XN0	Bdh1
Protein CUSTOS	Q3UY34	Custos
RNA guanine-N7 methyltransferase activating subunit	Q9CQY2	Ramac
Pleiotrophin	P63089	Ptn
Translocation protein SEC62	Q8BU14	Sec62
Methylmalonic aciduria type A homolog| mitochondrial	Q8C7H1	Mmaa
Fatty acid-binding protein 5	Q05816	Fabp5
Plasminogen receptor (KT)	Q9D3P8	Plgrkt
39S ribosomal protein L47| mitochondrial	Q8K2Y7	Mrpl47
COMM domain-containing protein 9	Q8K2Q0	Commd9
40S ribosomal protein S30	P62862	Fau
Dihydropyrimidinase-related protein 5	Q9EQF6	Dpysl5
E3 ubiquitin-protein ligase RNF114	Q9ET26	Rnf114
Mitochondrial inner membrane protein OXA1L	Q8BGA9	Oxa1l
Plexin domain-containing protein 2	Q9DC11	Plxdc2
Thymosin beta-10	Q6ZWY8	Tmsb10
Dihydropyrimidinase-related protein 3	Q62188	Dpysl3
ATP-binding cassette sub-family D member 2	Q61285	Abcd2
Ankyrin repeat and IBR domain-containing protein 1	Q6ZPS6	Ankib1
Myristoylated alanine-rich C-kinase substrate	P26645	Marcks
IgLON family member 5	Q8HW98	Iglon5
Transcriptional activator protein Pur-beta	O35295	Purb
Kinesin-like protein KIF3C	O35066	Kif3c
Tenascin	Q80YX1	Tnc
Fatty acid-binding protein| brain	P51880	Fabp7
Monocarboxylate transporter 2	O70451	Slc16a7
Neuromodulin	P06837	Gap43
MARCKS-related protein	P28667	Marcksl1
Ankyrin repeat domain-containing protein 13D	Q6PD24	Ankrd13d
High mobility group nucleosome-binding domain-containing protein 5	Q9JL35	Hmgn5
Hormone-sensitive lipase	P54310	Lipe
Tubulin beta-2B chain	Q9CWF2	Tubb2b
Beta-actin-like protein 2	Q8BFZ3	Actbl2
