# Supplementary material for: Autophagy controls the hippocampal postsynaptic organization and affects cognition in a mouse model of Fragile X syndrome
Source: Research Square preprint supplement (doi:10.21203/rs.3.rs-4415392/v1), 2025-08-27
Supplement: Supplementary file 8 [file c11dbc912a985321adbd3d2a.xlsx]

## Sheet: ADS1451
				Human FMR1 Methylation Analysis - Results in % Methylation
					ADS1451-FS1						ADS1451-FS2
CpG #'s are relative to the ATG translational start codon				From ATG	-523	-511	-509	-499	-488	-472	-456	-454	-450	-446	-441	-439	-437	-426	-421	-413	-409	-396	-394	-388	-386	-384	-523 to -384
				From TSS	-395	-383	-381	-371	-360	-344	-328	-326	-322	-318	-313	-311	-309	-298	-293	-285	-281	-268	-266	-260	-258	-256	-395 to -256
				GRCh38/hg38 (+)	ChrX:147911657	ChrX:147911669	ChrX:147911671	ChrX:147911681	ChrX:147911692	ChrX:147911708	ChrX:147911724	ChrX:147911726	ChrX:147911730	ChrX:147911734	ChrX:147911739	ChrX:147911741	ChrX:147911743	ChrX:147911754	ChrX:147911759	ChrX:147911767	ChrX:147911771	ChrX:147911784	ChrX:147911786	ChrX:147911792	ChrX:147911794	ChrX:147911796	ChrX:147911657-147911796
				Location	5-Upstream	5-Upstream	5-Upstream	5-Upstream	5-Upstream	5-Upstream	5-Upstream	5-Upstream	5-Upstream	5-Upstream	5-Upstream	5-Upstream	5-Upstream	5-Upstream	5-Upstream	5-Upstream	5-Upstream	5-Upstream	5-Upstream	5-Upstream	5-Upstream	5-Upstream	5' Upstream
				FASTA ID	FMR1.4606	FMR1.4618	FMR1.4620	FMR1.4630	FMR1.4641	FMR1.4657	FMR1.4673	FMR1.4675	FMR1.4679	FMR1.4683	FMR1.4688	FMR1.4690	FMR1.4692	FMR1.4703	FMR1.4708	FMR1.4716	FMR1.4720	FMR1.4733	FMR1.4735	FMR1.4741	FMR1.4743	FMR1.4745	FMR1.4606-4745
		Well	Sample ID	EpigenDx ID	CpG#-81 cg04744025	CpG #-80	CpG #-79	CpG #-78	CpG #-77	CpG #-76	CpG #-75	CpG #-74	CpG #-73	CpG #-72	CpG #-71	CpG #-70	CpG #-69	CpG #-68	CpG #-67	CpG #-66	CpG #-65	CpG #-64	CpG #-63	CpG #-62	CpG #-61	CpG #-60	Mean	St Dev	Min	Max
		A8	WT1	B133309	0.86	2.4	0.88	1.33	1.72	2.09	1.49	1.75	0	3.11	2.66	0	1.46	2.39	2.68	1.89	0	0	0	0	0	0	1.21409	1.08166	0	3.11
		B8	WT2	B133310	1.45	3.01	1.07	2.11	1.9	1.93	1.49	1.99	1.17	2.55	2.67	1.45	1.5	3.3	2.49	1.81	0	0	0	0	0	0	1.44955	1.06386	0	3.3
		C8	WT3	B133311	0.75	2.93	0.98	1.33	2.16	2.08	1.93	1.97	1.58	2.82	3.21	1.51	1.33	2.38	3.04	2.23	1.87	0	0	0	0	0	1.55	1.06452	0	3.21
		D8	F1	B133312	93.77	90.94	88.95	91.87	91.83	74.63	98.51	88.1	82.93	97.25	93.17	86.26	87.66	94.92	100	94.7	85.4	74.32	56.45	73.15	85.67	79.69	86.8259	10.2205	56.45	100
		E8	F2	B133313	89.22	85.91	89.69	90.97	91.85	78.56	98.8	89.08	80.39	95.43	91.62	85.44	84.54	84.48	100	94.2	89.11	71.76	54.89	71.54	84.93	78.25	85.4845	10.1801	54.89	100
		F8	F3	B133314	91.09	88.84	88.39	90.66	92.49	80.88	94.81	91.24	83.35	95.7	89.02	86.67	86.94	88.57	100	94.31	90.07	76.67	57.02	74.17	85.8	80.76	86.7023	9.04509	57.02	100
		A9	Methylation Controls	Low	1.61	6.68	0.87	2.93	2.15	2.68	4.38	4.21	2.22	3.54	4.14	0	2.74	4.24	2.65	3.17	0	0	0	0	0	0	2.19136	1.91212	0	6.68
		B9		Med	42.22	47.72	41.98	41.34	43.95	40.47	47.52	42.92	41.8	44.16	43.6	37.6	41.8	42.75	52.05	45.33	44.39	33.68	28.35	33.85	40.14	38.74	41.6527	5.11346	28.35	52.05
		C9		High	89.73	88.91	90.66	90.23	87.9	80.7	100	90.52	86.83	91.63	96.96	88.41	87.17	87.59	96.67	94.49	90.35	74.36	59.37	72.84	89.12	80.71	87.0523	9.01949	59.37	100
		D9		NTC							-	-	-	-	-	-	-	-	-	-	-	-	-	-	-	-
		G8		NTC	-	-	-	-	-	-	-	-	-	-	-	-	-	-	-	-	-	-	-	-	-	-
		H8		NTC	-	-	-	-	-	-	-	-	-	-	-	-	-	-	-	-	-	-	-	-	-	-
